# Supplementary material for: A platform of ADAPTive scaffolds: development of CDR-H3 β-hairpin mimics into covalent inhibitors of the PD1/PDL1 immune checkpoint
Source: RSC Chem Biol. 2024 Nov 4;5(12):1259–70. doi: 10.1039/d4cb00174e (PMC11562385; doi:10.1039/d4cb00174e)
Supplement: CB-005-D4CB00174E-s001 [file CB-005-D4CB00174E-s001.xlsx]

## Sheet: Summary
Peptides	Sequences	[θ]RC95 Value	Solvent	Concentration
		(deg.cm².dmol-1)		(µM)
Native	RWCAR-RDYRFDMGFD-YWGWE		PB/MeOH (50/50 v/v)	102
RC	RGVAR-RDYRGDPGFD-YWHWE	Random Coil	n.a.	n.a.
1a	RWVW-G4K2G4-WVWE	8643	PB	29
1b	RWVW-RDYRGDMGFD-WVWE	-6116	PB	54
1c	RWVW-RDYRFDMGFD-WVWE	-19595	PB/MeOH (80/20 v/v)	35
1d	RWVW-RRDYRFDMGFDY-WVWE	-19595	PB/MeOH (80/20 v/v)	10
2a	RWVAR-G4K2G2FD-YWVWE	-6518	PB	33
2b	RWVA-RRDYRGDMGFDY-WVWE	-6116	PB	30
2c	RWVAR-RDYRFDMGFD-YWVWE	-29978	PB/MeOH (90/10 v/v)	44
2d	RWVA-RRDYRGDMGFDY-WHWE	-6116	PB	34
2e	RWVAR-RDYRFDM..GFD-YWHWE	-19595	PB/MeOH (80/20 v/v)	89
2f	RWVKR-RDYRGDM..GFD-YWVWE	-6116	PB	26
2g	RWVKR-RDYRFDMGFD-YWVWE	-41537	PB/MeOH (90/10 v/v)	57
2h	RWVVR-RDYRGDMGFD-YWVWE	-22092	PB/H2O (90/10 v/v)	30
2i	RWVVR-RDYRFDMGFD-YWVWE	-19595	PB/MeOH (80/20 v/v)	83
2j	RWVAR-RDYRGDMGFN-YWVWE	-6116	PB	32
2k	RWVAR-RDYRFDMGFN-YWVWE	-19595	PB/MeOH (80/20 v/v)	50
2l	RWCAR-RDYRFDMGFD-YWCWE	-22092	PB/H2O (90/10 v/v)	47
1e	RWVW-SPDSSGVAY-WVWE	-6116	PB	34
1f	RWVW-RDLDIATTRDY-WVWE	-19595	PB/MeOH (80/20 v/v)	35
2m	RWVAR-QLYYFD-YWVWE	β-sheet	n.a.	n.a.
2n	RWVA-REGMNTDWYFDY-WHWE	-19595	PB/MeOH (80/20 v/v)	42
2o	RWVA-REGMNTDGYFDY-WHWE	-6116	PB	39
2p	RWVA-REGMNTDGYFN-YWVWE	-6116	PB	23
2q	RWVA-RAYGNYWYIDV-WHWE	β-sheet	PB/H2O (80/20 v/v)	31
2r	RWVA-RAYGNYGYIDV-WHWE	-22092	PB/H2O (90/10 v/v)	62
2ca	RWVAR-RDYRFD[Dab(ACA)]GFD-YWVWE	-29978	PB/MeOH (90/10 v/v)	15
2cb	RWVAR-RDYRFD[Dap(ACA)]GFD-YWVWE	-29978	PB/MeOH (90/10 v/v)	23
2cc	RWVAR-RDYRFD[Dab(DMA)]GFD-YWVWE	-29978	PB/MeOH (90/10 v/v)	21
2cd	RWVAR-RDYRFD[Dab(MAA)]GFD-YWVWE	-29978	PB/MeOH (90/10 v/v)	29
2pa	RWVA-REGMNTDG[Dab(ACA)]FN-YWVWE	-29978	PB/MeOH (90/10 v/v)	29
2pb	RWVA-REGMNTDG[Dap(ACA)]FN-YWVWE	-29978	PB/MeOH (90/10 v/v)	25

## Sheet: Native
	GKZ-26-50%MeOH-20dC - smoothed	GKZ-26-50%MeOH-37dC - smoothed	GKZ-26-50%MeOH-80dC - smoothed													c	0.000102497	M
Wavelength [nm]	20dC	37dC	80dC		Wavelenght	20dC	37dC	80dC								l	0.1	cm
195	0.515149	1.28483	2.01543		195	5025.99	12535.3	19663.3
195.1	-1.0031	1.43641	1.49162		195.1	-9786.62	14014.1	14552.9
195.2	-1.6123	1.63785	1.26905		195.2	-15730.2	15979.5	12381.4
195.3	-1.62849	1.60127	1.01212		195.3	-15888.2	15622.6	9874.68
195.4	-3.02694	1.66428	0.716998		195.4	-29532	16237.3	6995.31
195.5	-4.01092	1.80052	0.532987		195.5	-39132.1	17566.6	5200.03
195.6	-4.43874	1.77197	0.416877		195.6	-43306	17288	4067.21
195.7	-4.35244	1.6067	0.331406		195.7	-42464	15675.6	3233.32
195.8	-3.76922	1.24808	0.255656		195.8	-36774	12176.8	2494.28
195.9	-2.90147	0.708081	0.223761		195.9	-28307.9	6908.31	2183.1
196	-1.80657	0.0297953	0.187308		196	-17625.6	290.694	1827.45
196.1	-1.92104	-0.178975	0.150042		196.1	-18742.4	-1746.15	1463.87
196.2	-3.16947	0.234506	0.119624		196.2	-30922.6	2287.93	1167.09
196.3	-2.56736	-0.238744	0.221075		196.3	-25048.1	-2329.27	2156.89
196.4	-2.30701	-0.539705	0.36406		196.4	-22508	-5265.57	3551.91
196.5	-2.15843	-0.733555	0.536932		196.5	-21058.4	-7156.84	5238.51
196.6	-2.13765	-0.790209	0.683996		196.6	-20855.7	-7709.58	6673.32
196.7	-2.2064	-0.804043	0.819097		196.7	-21526.4	-7844.55	7991.42
196.8	-2.26721	-0.783376	0.974379		196.8	-22119.8	-7642.92	9506.42
196.9	-2.33506	-0.761318	1.06441		196.9	-22781.7	-7427.71	10384.8
197	-2.36072	-0.752676	1.12288		197	-23032.1	-7343.39	10955.3
197.1	-2.36297	-0.768833	1.16507		197.1	-23054.1	-7501.03	11366.9
197.2	-2.3908	-0.802673	1.19136		197.2	-23325.6	-7831.19	11623.3
197.3	-2.44776	-0.853669	1.1963		197.3	-23881.3	-8328.72	11671.6
197.4	-2.56216	-0.927608	1.18792		197.4	-24997.4	-9050.1	11589.8
197.5	-2.70292	-1.03211	1.15734		197.5	-26370.8	-10069.6	11291.5
197.6	-2.87771	-1.14539	1.10157		197.6	-28076.1	-11174.9	10747.3
197.7	-3.04196	-1.28403	1.05566		197.7	-29678.5	-12527.5	10299.4
197.8	-3.19989	-1.44383	1.02244		197.8	-31219.3	-14086.5	9975.35
197.9	-3.35663	-1.61838	0.986809		197.9	-32748.6	-15789.5	9627.69
198	-3.52218	-1.81554	0.957521		198	-34363.7	-17713.1	9341.94
198.1	-3.69589	-2.0085	0.936922		198.1	-36058.5	-19595.7	9140.97
198.2	-3.86656	-2.20443	0.925558		198.2	-37723.7	-21507.3	9030.09
198.3	-4.00821	-2.37871	0.909664		198.3	-39105.6	-23207.6	8875.03
198.4	-4.13795	-2.52055	0.906147		198.4	-40371.5	-24591.5	8840.72
198.5	-4.25975	-2.63217	0.910883		198.5	-41559.8	-25680.4	8886.93
198.6	-4.37002	-2.71385	0.900221		198.6	-42635.6	-26477.3	8782.9
198.7	-4.46252	-2.77554	0.871553		198.7	-43538.1	-27079.3	8503.21
198.8	-4.52927	-2.80737	0.837059		198.8	-44189.3	-27389.7	8166.67
198.9	-4.56913	-2.82433	0.80104		198.9	-44578.2	-27555.2	7815.26
199	-4.59156	-2.83685	0.757777		199	-44797	-27677.4	7393.17
199.1	-4.62151	-2.83969	0.710237		199.1	-45089.2	-27705.1	6929.34
199.2	-4.6657	-2.84208	0.647089		199.2	-45520.3	-27728.4	6313.25
199.3	-4.71463	-2.85301	0.567123		199.3	-45997.7	-27835	5533.07
199.4	-4.76446	-2.86803	0.477827		199.4	-46483.9	-27981.6	4661.87
199.5	-4.81932	-2.88848	0.398771		199.5	-47019.1	-28181.1	3890.56
199.6	-4.86778	-2.91833	0.320596		199.6	-47491.9	-28472.3	3127.86
199.7	-4.91619	-2.94951	0.240546		199.7	-47964.2	-28776.5	2346.86
199.8	-4.95881	-2.98389	0.163603		199.8	-48380	-29112	1596.17
199.9	-4.99649	-3.02366	0.0941032		199.9	-48747.7	-29500	918.107
200	-5.01809	-3.07216	0.0390491		200	-48958.4	-29973.2	380.978
200.1	-5.02313	-3.11916	0.00342952		200.1	-49007.6	-30431.7	33.4597
200.2	-5.01873	-3.1646	-0.0251444		200.2	-48964.7	-30875	-245.318
200.3	-5.0083	-3.2136	-0.0477166		200.3	-48862.9	-31353.1	-465.542
200.4	-5.00608	-3.25221	-0.0755418		200.4	-48841.3	-31729.8	-737.014
200.5	-5.00519	-3.28696	-0.105277		200.5	-48832.5	-32068.9	-1027.12
200.6	-5.00314	-3.31832	-0.137838		200.6	-48812.6	-32374.8	-1344.8
200.7	-4.99921	-3.34082	-0.176219		200.7	-48774.2	-32594.3	-1719.26
200.8	-4.98893	-3.35159	-0.224787		200.8	-48673.9	-32699.4	-2193.11
200.9	-4.97018	-3.35334	-0.282375		200.9	-48490.9	-32716.5	-2754.96
201	-4.95728	-3.35149	-0.343434		201	-48365.1	-32698.5	-3350.67
201.1	-4.95651	-3.34342	-0.406444		201.1	-48357.7	-32619.7	-3965.42
201.2	-4.95703	-3.3282	-0.466093		201.2	-48362.6	-32471.2	-4547.38
201.3	-4.95071	-3.31279	-0.523595		201.3	-48301	-32320.8	-5108.39
201.4	-4.94069	-3.3007	-0.579729		201.4	-48203.2	-32202.9	-5656.06
201.5	-4.93247	-3.28912	-0.634895		201.5	-48123.1	-32090	-6194.28
201.6	-4.92565	-3.27282	-0.689839		201.6	-48056.5	-31930.9	-6730.33
201.7	-4.92365	-3.25872	-0.74229		201.7	-48037	-31793.3	-7242.07
201.8	-4.92119	-3.24872	-0.786883		201.8	-48013	-31695.8	-7677.13
201.9	-4.91421	-3.23813	-0.828465		201.9	-47944.9	-31592.4	-8082.82
202	-4.90577	-3.23045	-0.871576		202	-47862.6	-31517.5	-8503.43
202.1	-4.89478	-3.2261	-0.91508		202.1	-47755.4	-31475.1	-8927.87
202.2	-4.88664	-3.22016	-0.955829		202.2	-47675.9	-31417.1	-9325.43
202.3	-4.87859	-3.2105	-0.990314		202.3	-47597.4	-31322.9	-9661.88
202.4	-4.87121	-3.2027	-1.01857		202.4	-47525.4	-31246.8	-9937.52
202.5	-4.85811	-3.18944	-1.05399		202.5	-47397.6	-31117.4	-10283.1
202.6	-4.82843	-3.1842	-1.0753		202.6	-47108	-31066.3	-10491
202.7	-4.80721	-3.17493	-1.10067		202.7	-46901	-30975.9	-10738.6
202.8	-4.79785	-3.16093	-1.12722		202.8	-46809.7	-30839.3	-10997.6
202.9	-4.78438	-3.14289	-1.15534		202.9	-46678.3	-30663.2	-11271.9
203	-4.76373	-3.12549	-1.18348		203	-46476.8	-30493.4	-11546.4
203.1	-4.74879	-3.10537	-1.21302		203.1	-46331	-30297.2	-11834.7
203.2	-4.75678	-3.08215	-1.24585		203.2	-46408.9	-30070.7	-12155
203.3	-4.77971	-3.05349	-1.2778		203.3	-46632.7	-29791	-12466.7
203.4	-4.79828	-3.02142	-1.30805		203.4	-46813.8	-29478.1	-12761.8
203.5	-4.79899	-2.99028	-1.33716		203.5	-46820.8	-29174.3	-13045.9
203.6	-4.78665	-2.96255	-1.36656		203.6	-46700.4	-28903.8	-13332.7
203.7	-4.77126	-2.9357	-1.39682		203.7	-46550.2	-28641.8	-13628
203.8	-4.74025	-2.91149	-1.42849		203.8	-46247.7	-28405.6	-13936.9
203.9	-4.69392	-2.89249	-1.45791		203.9	-45795.7	-28220.2	-14224
204	-4.63613	-2.87485	-1.48732		204	-45231.9	-28048.1	-14510.9
204.1	-4.56993	-2.86173	-1.51605		204.1	-44586	-27920.2	-14791.1
204.2	-4.50527	-2.84929	-1.54301		204.2	-43955.1	-27798.8	-15054.2
204.3	-4.44768	-2.83442	-1.56667		204.3	-43393.2	-27653.7	-15285
204.4	-4.3985	-2.81298	-1.59018		204.4	-42913.5	-27444.5	-15514.4
204.5	-4.35269	-2.78603	-1.61095		204.5	-42466.5	-27181.6	-15717
204.6	-4.31277	-2.75382	-1.62915		204.6	-42077	-26867.3	-15894.6
204.7	-4.27677	-2.71644	-1.64402		204.7	-41725.8	-26502.6	-16039.7
204.8	-4.24317	-2.67421	-1.6534		204.8	-41398	-26090.6	-16131.2
204.9	-4.20428	-2.6301	-1.66032		204.9	-41018.6	-25660.3	-16198.7
205	-4.16216	-2.58408	-1.66626		205	-40607.6	-25211.3	-16256.7
205.1	-4.11318	-2.53623	-1.67069		205.1	-40129.7	-24744.5	-16299.9
205.2	-4.06202	-2.48598	-1.67177		205.2	-39630.7	-24254.2	-16310.5
205.3	-4.01139	-2.4331	-1.6689		205.3	-39136.6	-23738.3	-16282.5
205.4	-3.95877	-2.37748	-1.66512		205.4	-38623.3	-23195.6	-16245.5
205.5	-3.9092	-2.31716	-1.65938		205.5	-38139.6	-22607.1	-16189.5
205.6	-3.86287	-2.25559	-1.65286		205.6	-37687.6	-22006.4	-16125.9
205.7	-3.82242	-2.19741	-1.6458		205.7	-37293	-21438.8	-16057
205.8	-3.78498	-2.14332	-1.63936		205.8	-36927.7	-20911.1	-15994.2
205.9	-3.74321	-2.09355	-1.63699		205.9	-36520.1	-20425.5	-15971.1
206	-3.69689	-2.04685	-1.63844		206	-36068.3	-19969.8	-15985.3
206.1	-3.65168	-2.00509	-1.64233		206.1	-35627.2	-19562.4	-16023.2
206.2	-3.60789	-1.9686	-1.64901		206.2	-35200	-19206.4	-16088.4
206.3	-3.5615	-1.93755	-1.65489		206.3	-34747.3	-18903.5	-16145.8
206.4	-3.51341	-1.91082	-1.65916		206.4	-34278.2	-18642.7	-16187.4
206.5	-3.47064	-1.89004	-1.66259		206.5	-33860.8	-18440	-16220.9
206.6	-3.42998	-1.87373	-1.66555		206.6	-33464.2	-18280.8	-16249.7
206.7	-3.39598	-1.85811	-1.66842		206.7	-33132.4	-18128.4	-16277.7
206.8	-3.36922	-1.84366	-1.67285		206.8	-32871.4	-17987.4	-16320.9
206.9	-3.3466	-1.83343	-1.67929		206.9	-32650.7	-17887.7	-16383.8
207	-3.32852	-1.82731	-1.68757		207	-32474.3	-17827.9	-16464.6
207.1	-3.31188	-1.82353	-1.69588		207.1	-32311.9	-17791.1	-16545.7
207.2	-3.2992	-1.82323	-1.70531		207.2	-32188.2	-17788.1	-16637.6
207.3	-3.28619	-1.82713	-1.71505		207.3	-32061.4	-17826.1	-16732.7
207.4	-3.27266	-1.83246	-1.72385		207.4	-31929.3	-17878.2	-16818.5
207.5	-3.25697	-1.83688	-1.73103		207.5	-31776.2	-17921.3	-16888.5
207.6	-3.24257	-1.84062	-1.73495		207.6	-31635.8	-17957.7	-16926.8
207.7	-3.22825	-1.84555	-1.73418		207.7	-31496.1	-18005.9	-16919.3
207.8	-3.20997	-1.85225	-1.72842		207.8	-31317.7	-18071.2	-16863.2
207.9	-3.18989	-1.85844	-1.72027		207.9	-31121.8	-18131.7	-16783.6
208	-3.17395	-1.86384	-1.71192		208	-30966.3	-18184.3	-16702.1
208.1	-3.1597	-1.86788	-1.70418		208.1	-30827.3	-18223.8	-16626.6
208.2	-3.14674	-1.86987	-1.69774		208.2	-30700.8	-18243.2	-16563.8
208.3	-3.13648	-1.87032	-1.69085		208.3	-30600.7	-18247.5	-16496.6
208.4	-3.12757	-1.86982	-1.68139		208.4	-30513.8	-18242.7	-16404.3
208.5	-3.11952	-1.86466	-1.6718		208.5	-30435.3	-18192.3	-16310.8
208.6	-3.11117	-1.85287	-1.66269		208.6	-30353.8	-18077.3	-16221.8
208.7	-3.10034	-1.83748	-1.65374		208.7	-30248.1	-17927.2	-16134.5
208.8	-3.08817	-1.81886	-1.64538		208.8	-30129.3	-17745.5	-16052.9
208.9	-3.07239	-1.79657	-1.63754		208.9	-29975.4	-17528.1	-15976.5
209	-3.05458	-1.7679	-1.63167		209	-29801.6	-17248.3	-15919.2
209.1	-3.03625	-1.73399	-1.62708		209.1	-29622.8	-16917.5	-15874.4
209.2	-3.02074	-1.6971	-1.62313		209.2	-29471.5	-16557.6	-15835.9
209.3	-3.00603	-1.66043	-1.61875		209.3	-29328	-16199.7	-15793.1
209.4	-2.98987	-1.62224	-1.61938		209.4	-29170.3	-15827.2	-15799.3
209.5	-2.97574	-1.58303	-1.62379		209.5	-29032.5	-15444.7	-15842.3
209.6	-2.96097	-1.54207	-1.63183		209.6	-28888.3	-15045.1	-15920.7
209.7	-2.94367	-1.49907	-1.64421		209.7	-28719.6	-14625.5	-16041.5
209.8	-2.92484	-1.45546	-1.65762		209.8	-28535.9	-14200	-16172.3
209.9	-2.90731	-1.41184	-1.66938		209.9	-28364.8	-13774.5	-16287.1
210	-2.88901	-1.36848	-1.68243		210	-28186.3	-13351.4	-16414.5
210.1	-2.87031	-1.32677	-1.6978		210.1	-28003.8	-12944.5	-16564.4
210.2	-2.85416	-1.29022	-1.71451		210.2	-27846.3	-12587.9	-16727.4
210.3	-2.84092	-1.25832	-1.73247		210.3	-27717.1	-12276.7	-16902.6
210.4	-2.8317	-1.2284	-1.75257		210.4	-27627.2	-11984.8	-17098.8
210.5	-2.82785	-1.20031	-1.77434		210.5	-27589.6	-11710.7	-17311.1
210.6	-2.82859	-1.1741	-1.79682		210.6	-27596.8	-11455	-17530.5
210.7	-2.83356	-1.15103	-1.82022		210.7	-27645.3	-11229.9	-17758.8
210.8	-2.83852	-1.1317	-1.84595		210.8	-27693.7	-11041.3	-18009.8
210.9	-2.84161	-1.11605	-1.87329		210.9	-27723.8	-10888.6	-18276.6
211	-2.84301	-1.10306	-1.8999		211	-27737.5	-10761.9	-18536.2
211.1	-2.84272	-1.09167	-1.92233		211.1	-27734.7	-10650.8	-18755
211.2	-2.8406	-1.08363	-1.94313		211.2	-27714	-10572.4	-18957.9
211.3	-2.83647	-1.07849	-1.96209		211.3	-27673.6	-10522.2	-19142.9
211.4	-2.83124	-1.07715	-1.97854		211.4	-27622.7	-10509.1	-19303.4
211.5	-2.82491	-1.08004	-1.99439		211.5	-27560.9	-10537.3	-19458.1
211.6	-2.81653	-1.08572	-2.0117		211.6	-27479.2	-10592.7	-19626.9
211.7	-2.80751	-1.09242	-2.02931		211.7	-27391.1	-10658.1	-19798.8
211.8	-2.79893	-1.09918	-2.04502		211.8	-27307.4	-10724	-19952
211.9	-2.78818	-1.10542	-2.05842		211.9	-27202.5	-10784.9	-20082.7
212	-2.77567	-1.11352	-2.07051		212	-27080.5	-10864	-20200.7
212.1	-2.76207	-1.12319	-2.08159		212.1	-26947.8	-10958.3	-20308.8
212.2	-2.74717	-1.13225	-2.09158		212.2	-26802.4	-11046.7	-20406.3
212.3	-2.73023	-1.14101	-2.10109		212.3	-26637.2	-11132.1	-20499.1
212.4	-2.71087	-1.1503	-2.11098		212.4	-26448.2	-11222.8	-20595.5
212.5	-2.69076	-1.15773	-2.12062		212.5	-26252.1	-11295.3	-20689.6
212.6	-2.67287	-1.16232	-2.13134		212.6	-26077.6	-11340.1	-20794.1
212.7	-2.6563	-1.16512	-2.14553		212.7	-25915.9	-11367.3	-20932.6
212.8	-2.64289	-1.16578	-2.16495		212.8	-25785	-11373.8	-21122.1
212.9	-2.63321	-1.16392	-2.18584		212.9	-25690.7	-11355.7	-21325.9
213	-2.62698	-1.1603	-2.2089		213	-25629.8	-11320.3	-21550.9
213.1	-2.62264	-1.15421	-2.2342		213.1	-25587.5	-11261	-21797.7
213.2	-2.62037	-1.1443	-2.26253		213.2	-25565.3	-11164.2	-22074.1
213.3	-2.61836	-1.13315	-2.29166		213.3	-25545.8	-11055.4	-22358.3
213.4	-2.61566	-1.12301	-2.32086		213.4	-25519.4	-10956.5	-22643.2
213.5	-2.61162	-1.11304	-2.35121		213.5	-25480	-10859.3	-22939.3
213.6	-2.60801	-1.10338	-2.38352		213.6	-25444.7	-10765	-23254.6
213.7	-2.60611	-1.0919	-2.41834		213.7	-25426.2	-10653	-23594.3
213.8	-2.60308	-1.07965	-2.45428		213.8	-25396.7	-10533.5	-23944.9
213.9	-2.60066	-1.0691	-2.49092		213.9	-25373	-10430.5	-24302.4
214	-2.59877	-1.05818	-2.52798		214	-25354.6	-10324.1	-24663.9
214.1	-2.59725	-1.04752	-2.56376		214.1	-25339.8	-10220	-25013
214.2	-2.59729	-1.03855	-2.59772		214.2	-25340.2	-10132.5	-25344.3
214.3	-2.59967	-1.0322	-2.6302		214.3	-25363.4	-10070.5	-25661.2
214.4	-2.60567	-1.02795	-2.66035		214.4	-25421.9	-10029.1	-25955.4
214.5	-2.61247	-1.02602	-2.68756		214.5	-25488.3	-10010.2	-26220.9
214.6	-2.61828	-1.02487	-2.71492		214.6	-25544.9	-9999.06	-26487.8
214.7	-2.62293	-1.02418	-2.74154		214.7	-25590.3	-9992.27	-26747.5
214.8	-2.62533	-1.02497	-2.76701		214.8	-25613.7	-10000	-26996
214.9	-2.62633	-1.02692	-2.79091		214.9	-25623.5	-10019	-27229.1
215	-2.62701	-1.02959	-2.81493		215	-25630.1	-10045.1	-27463.6
215.1	-2.62737	-1.03284	-2.83925		215.1	-25633.7	-10076.8	-27700.8
215.2	-2.62758	-1.03551	-2.86263		215.2	-25635.7	-10102.8	-27928.9
215.3	-2.62861	-1.03826	-2.88457		215.3	-25645.8	-10129.7	-28142.9
215.4	-2.62961	-1.04011	-2.90435		215.4	-25655.5	-10147.7	-28336
215.5	-2.63067	-1.04108	-2.92316		215.5	-25665.9	-10157.2	-28519.5
215.6	-2.631	-1.04192	-2.94097		215.6	-25669.1	-10165.3	-28693.3
215.7	-2.63159	-1.04343	-2.95648		215.7	-25674.8	-10180.1	-28844.5
215.8	-2.63179	-1.04606	-2.97035		215.8	-25676.7	-10205.7	-28979.9
215.9	-2.63032	-1.04923	-2.98265		215.9	-25662.4	-10236.7	-29099.8
216	-2.627	-1.05239	-2.99398		216	-25630	-10267.5	-29210.4
216.1	-2.6221	-1.05407	-3.00516		216.1	-25582.2	-10283.9	-29319.5
216.2	-2.6176	-1.05506	-3.01616		216.2	-25538.3	-10293.6	-29426.8
216.3	-2.61462	-1.05591	-3.02622		216.3	-25509.3	-10301.9	-29525
216.4	-2.61119	-1.05672	-3.03445		216.4	-25475.7	-10309.8	-29605.3
216.5	-2.60682	-1.05726	-3.04047		216.5	-25433.1	-10315	-29664
216.6	-2.60148	-1.05776	-3.04528		216.6	-25381	-10319.9	-29710.9
216.7	-2.5958	-1.05648	-3.04792		216.7	-25325.6	-10307.4	-29736.7
216.8	-2.59085	-1.0534	-3.04876		216.8	-25277.3	-10277.3	-29744.9
216.9	-2.58659	-1.04886	-3.0477		216.9	-25235.8	-10233.1	-29734.5
217	-2.58071	-1.04258	-3.04288		217	-25178.4	-10171.8	-29687.5
217.1	-2.57475	-1.03554	-3.03619		217.1	-25120.3	-10103.1	-29622.2
217.2	-2.56859	-1.02784	-3.02798		217.2	-25060.1	-10028	-29542.1
217.3	-2.5616	-1.01903	-3.01875		217.3	-24992	-9942.03	-29452.1
217.4	-2.55388	-1.00864	-3.01046		217.4	-24916.7	-9840.64	-29371.2
217.5	-2.54615	-0.996902	-3.00262		217.5	-24841.2	-9726.16	-29294.7
217.6	-2.53845	-0.985041	-2.99369		217.6	-24766.1	-9610.44	-29207.6
217.7	-2.53011	-0.972527	-2.98404		217.7	-24684.7	-9488.34	-29113.4
217.8	-2.52048	-0.959339	-2.9735		217.8	-24590.8	-9359.67	-29010.6
217.9	-2.50873	-0.944696	-2.96196		217.9	-24476.1	-9216.81	-28898
218	-2.49671	-0.928711	-2.9495		218	-24358.9	-9060.86	-28776.4
218.1	-2.48574	-0.910857	-2.93815		218.1	-24251.8	-8886.67	-28665.7
218.2	-2.47607	-0.891903	-2.92717		218.2	-24157.4	-8701.75	-28558.6
218.3	-2.46818	-0.872461	-2.91492		218.3	-24080.5	-8512.07	-28439.1
218.4	-2.46146	-0.851741	-2.90061		218.4	-24014.9	-8309.91	-28299.5
218.5	-2.45443	-0.830496	-2.88615		218.5	-23946.3	-8102.63	-28158.4
218.6	-2.44637	-0.808827	-2.87258		218.6	-23867.8	-7891.22	-28026
218.7	-2.43668	-0.7873	-2.85867		218.7	-23773.2	-7681.2	-27890.3
218.8	-2.42523	-0.766418	-2.84445		218.8	-23661.4	-7477.47	-27751.5
218.9	-2.4125	-0.745341	-2.83051		218.9	-23537.3	-7271.83	-27615.6
219	-2.40005	-0.723833	-2.81498		219	-23415.8	-7061.99	-27464
219.1	-2.38844	-0.703605	-2.79672		219.1	-23302.5	-6864.64	-27285.8
219.2	-2.37799	-0.683637	-2.77764		219.2	-23200.5	-6669.83	-27099.7
219.3	-2.36807	-0.663274	-2.75864		219.3	-23103.8	-6471.15	-26914.3
219.4	-2.35758	-0.64261	-2.739		219.4	-23001.4	-6269.55	-26722.7
219.5	-2.34619	-0.623434	-2.71798		219.5	-22890.3	-6082.46	-26517.6
219.6	-2.33308	-0.606215	-2.69518		219.6	-22762.4	-5914.46	-26295.2
219.7	-2.31927	-0.590857	-2.66997		219.7	-22627.7	-5764.62	-26049.3
219.8	-2.30546	-0.576868	-2.64219		219.8	-22493	-5628.14	-25778.3
219.9	-2.29028	-0.563868	-2.61303		219.9	-22344.8	-5501.31	-25493.8
220	-2.27287	-0.55309	-2.58327		220	-22175	-5396.16	-25203.4
220.1	-2.2537	-0.543968	-2.55344		220.1	-21988	-5307.16	-24912.4
220.2	-2.23489	-0.536	-2.52402		220.2	-21804.4	-5229.42	-24625.3
220.3	-2.21819	-0.529826	-2.49563		220.3	-21641.5	-5169.19	-24348.4
220.4	-2.20358	-0.525518	-2.46983		220.4	-21499	-5127.16	-24096.7
220.5	-2.18969	-0.523025	-2.44511		220.5	-21363.4	-5102.83	-23855.4
220.6	-2.17594	-0.521547	-2.42122		220.6	-21229.3	-5088.41	-23622.4
220.7	-2.16154	-0.520433	-2.39896		220.7	-21088.8	-5077.54	-23405.1
220.8	-2.14636	-0.518123	-2.37837		220.8	-20940.8	-5055.01	-23204.3
220.9	-2.13142	-0.514431	-2.35828		220.9	-20795	-5018.98	-23008.3
221	-2.11516	-0.509696	-2.33821		221	-20636.3	-4972.79	-22812.5
221.1	-2.09779	-0.504399	-2.31723		221.1	-20466.8	-4921.11	-22607.8
221.2	-2.08064	-0.497383	-2.2966		221.2	-20299.5	-4852.66	-22406.5
221.3	-2.06368	-0.487811	-2.277		221.3	-20134.1	-4759.27	-22215.3
221.4	-2.04672	-0.47613	-2.259		221.4	-19968.6	-4645.31	-22039.7
221.5	-2.03117	-0.461751	-2.24272		221.5	-19816.8	-4505.02	-21880.9
221.6	-2.01631	-0.444147	-2.22809		221.6	-19671.9	-4333.27	-21738.1
221.7	-2.0026	-0.423561	-2.21399		221.7	-19538.1	-4132.42	-21600.5
221.8	-1.98957	-0.403061	-2.19863		221.8	-19411	-3932.42	-21450.7
221.9	-1.97539	-0.382662	-2.18202		221.9	-19272.7	-3733.4	-21288.6
222	-1.95925	-0.360511	-2.16392		222	-19115.2	-3517.29	-21112.1
222.1	-1.94141	-0.335346	-2.14455		222.1	-18941.1	-3271.77	-20923
222.2	-1.92353	-0.307729	-2.12285		222.2	-18766.7	-3002.32	-20711.3
222.3	-1.90625	-0.278879	-2.10002		222.3	-18598.1	-2720.85	-20488.6
222.4	-1.88961	-0.248985	-2.07708		222.4	-18435.8	-2429.19	-20264.8
222.5	-1.8724	-0.218844	-2.05388		222.5	-18267.8	-2135.13	-20038.4
222.6	-1.85392	-0.188697	-2.02988		222.6	-18087.5	-1841	-19804.3
222.7	-1.83631	-0.158724	-2.0064		222.7	-17915.7	-1548.57	-19575.2
222.8	-1.8198	-0.128378	-1.98355		222.8	-17754.7	-1252.51	-19352.3
222.9	-1.80355	-0.0977491	-1.96128		222.9	-17596.1	-953.677	-19135
223	-1.78802	-0.0673858	-1.939		223	-17444.6	-657.442	-18917.6
223.1	-1.77154	-0.0371722	-1.91738		223.1	-17283.8	-362.666	-18706.7
223.2	-1.75382	-0.00697882	-1.89554		223.2	-17110.9	-68.088	-18493.7
223.3	-1.73563	0.0221275	-1.87361		223.3	-16933.4	215.885	-18279.7
223.4	-1.71615	0.0501455	-1.85255		223.4	-16743.4	489.239	-18074.2
223.5	-1.69502	0.0790193	-1.83337		223.5	-16537.3	770.942	-17887
223.6	-1.67241	0.107631	-1.81501		223.6	-16316.6	1050.09	-17707.9
223.7	-1.64918	0.135014	-1.79612		223.7	-16090	1317.25	-17523.7
223.8	-1.62547	0.160577	-1.77716		223.8	-15858.7	1566.65	-17338.7
223.9	-1.60154	0.18583	-1.75904		223.9	-15625.2	1813.03	-17161.9
224	-1.57749	0.210535	-1.74123		224	-15390.6	2054.06	-16988.1
224.1	-1.55447	0.233617	-1.7242		224.1	-15166	2279.26	-16821.9
224.2	-1.53172	0.255695	-1.70874		224.2	-14944.1	2494.66	-16671.1
224.3	-1.50958	0.277186	-1.69459		224.3	-14728	2704.34	-16533.1
224.4	-1.4876	0.298901	-1.68225		224.4	-14513.5	2916.19	-16412.7
224.5	-1.46557	0.319264	-1.67067		224.5	-14298.6	3114.86	-16299.7
224.6	-1.44211	0.33863	-1.66075		224.6	-14069.8	3303.8	-16202.9
224.7	-1.41683	0.355682	-1.65123		224.7	-13823.1	3470.17	-16110
224.8	-1.39142	0.369222	-1.64188		224.8	-13575.2	3602.27	-16018.8
224.9	-1.36578	0.3796	-1.63338		224.9	-13325.1	3703.52	-15935.9
225	-1.34033	0.388097	-1.62494		225	-13076.8	3786.42	-15853.6
225.1	-1.31608	0.394995	-1.61581		225.1	-12840.1	3853.72	-15764.5
225.2	-1.293	0.400716	-1.60579		225.2	-12615	3909.53	-15666.7
225.3	-1.27068	0.405575	-1.59572		225.3	-12397.2	3956.95	-15568.5
225.4	-1.2487	0.409143	-1.58723		225.4	-12182.8	3991.76	-15485.6
225.5	-1.22658	0.411219	-1.57975		225.5	-11967	4012.01	-15412.7
225.6	-1.20321	0.411414	-1.57251		225.6	-11739	4013.91	-15342
225.7	-1.17798	0.410733	-1.56577		225.7	-11492.8	4007.26	-15276.3
225.8	-1.15016	0.409898	-1.55873		225.8	-11221.4	3999.12	-15207.6
225.9	-1.12103	0.407814	-1.5512		225.9	-10937.2	3978.79	-15134.1
226	-1.09077	0.404873	-1.543		226	-10642	3950.09	-15054.1
226.1	-1.06025	0.400467	-1.53474		226.1	-10344.2	3907.11	-14973.6
226.2	-1.03032	0.395552	-1.52622		226.2	-10052.2	3859.16	-14890.4
226.3	-1.00231	0.390452	-1.51753		226.3	-9778.92	3809.4	-14805.7
226.4	-0.97651	0.385847	-1.50871		226.4	-9527.2	3764.47	-14719.5
226.5	-0.952093	0.382374	-1.49985		226.5	-9288.99	3730.59	-14633.1
226.6	-0.928391	0.379967	-1.49101		226.6	-9057.74	3707.1	-14546.9
226.7	-0.904462	0.379094	-1.48268		226.7	-8824.28	3698.59	-14465.6
226.8	-0.880043	0.379834	-1.47512		226.8	-8586.03	3705.81	-14391.8
226.9	-0.856296	0.380936	-1.4695		226.9	-8354.35	3716.55	-14337
227	-0.833218	0.382521	-1.46483		227	-8129.2	3732.02	-14291.5
227.1	-0.811122	0.385252	-1.46016		227.1	-7913.62	3758.67	-14245.9
227.2	-0.78988	0.388988	-1.4561		227.2	-7706.37	3795.12	-14206.3
227.3	-0.770153	0.392803	-1.45355		227.3	-7513.91	3832.34	-14181.4
227.4	-0.752759	0.396484	-1.45119		227.4	-7344.21	3868.25	-14158.4
227.5	-0.737535	0.401535	-1.44929		227.5	-7195.67	3917.53	-14139.8
227.6	-0.724302	0.406899	-1.44796		227.6	-7066.57	3969.86	-14126.9
227.7	-0.712187	0.412117	-1.44781		227.7	-6948.37	4020.78	-14125.4
227.8	-0.700795	0.417041	-1.4486		227.8	-6837.22	4068.81	-14133.1
227.9	-0.689643	0.420568	-1.44969		227.9	-6728.42	4103.22	-14143.7
228	-0.67777	0.42285	-1.45149		228	-6612.59	4125.48	-14161.3
228.1	-0.663785	0.424216	-1.45414		228.1	-6476.14	4138.82	-14187.1
228.2	-0.648604	0.424853	-1.45689		228.2	-6328.03	4145.03	-14213.9
228.3	-0.634191	0.424564	-1.45942		228.3	-6187.41	4142.21	-14238.7
228.4	-0.62075	0.423493	-1.4629		228.4	-6056.27	4131.76	-14272.6
228.5	-0.607063	0.421927	-1.46702		228.5	-5922.74	4116.48	-14312.8
228.6	-0.591934	0.420073	-1.47009		228.6	-5775.13	4098.4	-14342.8
228.7	-0.575964	0.418339	-1.47219		228.7	-5619.32	4081.48	-14363.2
228.8	-0.559699	0.416629	-1.47293		228.8	-5460.64	4064.79	-14370.5
228.9	-0.543834	0.415334	-1.47292		228.9	-5305.85	4052.16	-14370.3
229	-0.528267	0.415174	-1.47212		229	-5153.98	4050.6	-14362.6
229.1	-0.512667	0.415047	-1.47122		229.1	-5001.78	4049.36	-14353.8
229.2	-0.497405	0.414677	-1.47027		229.2	-4852.88	4045.74	-14344.5
229.3	-0.482237	0.414775	-1.46936		229.3	-4704.89	4046.7	-14335.6
229.4	-0.466118	0.416062	-1.4679		229.4	-4547.62	4059.26	-14321.4
229.5	-0.449511	0.418632	-1.46632		229.5	-4385.61	4084.33	-14306
229.6	-0.433119	0.422731	-1.46453		229.6	-4225.67	4124.33	-14288.5
229.7	-0.417574	0.427915	-1.46109		229.7	-4074.01	4174.9	-14255
229.8	-0.402416	0.433646	-1.4562		229.8	-3926.13	4230.82	-14207.3
229.9	-0.386733	0.439526	-1.45109		229.9	-3773.11	4288.19	-14157.4
230	-0.370527	0.444719	-1.4456		230	-3615.01	4338.85	-14103.8
230.1	-0.355125	0.448286	-1.43895		230.1	-3464.74	4373.65	-14038.9
230.2	-0.34108	0.451333	-1.43193		230.2	-3327.7	4403.38	-13970.5
230.3	-0.329612	0.453758	-1.4251		230.3	-3215.82	4427.04	-13903.8
230.4	-0.319768	0.455421	-1.41815		230.4	-3119.78	4443.27	-13836
230.5	-0.311434	0.456422	-1.41203		230.5	-3038.47	4453.03	-13776.3
230.6	-0.303749	0.45688	-1.40518		230.6	-2963.5	4457.49	-13709.5
230.7	-0.296549	0.45626	-1.39769		230.7	-2893.25	4451.44	-13636.4
230.8	-0.290038	0.45451	-1.38992		230.8	-2829.73	4434.37	-13560.6
230.9	-0.28397	0.451779	-1.38201		230.9	-2770.52	4407.73	-13483.4
231	-0.27855	0.448441	-1.37382		231	-2717.64	4375.16	-13403.5
231.1	-0.274508	0.445088	-1.36497		231.1	-2678.2	4342.45	-13317.1
231.2	-0.270375	0.441663	-1.35519		231.2	-2637.88	4309.03	-13221.7
231.3	-0.265432	0.43822	-1.34575		231.3	-2589.66	4275.45	-13129.6
231.4	-0.260335	0.435508	-1.33723		231.4	-2539.93	4248.98	-13046.5
231.5	-0.257011	0.432833	-1.32917		231.5	-2507.5	4222.89	-12967.9
231.6	-0.255476	0.430595	-1.32107		231.6	-2492.53	4201.05	-12888.9
231.7	-0.255165	0.429368	-1.31197		231.7	-2489.49	4189.08	-12800.1
231.8	-0.255752	0.429158	-1.30121		231.8	-2495.21	4187.03	-12695.1
231.9	-0.256187	0.429419	-1.28902		231.9	-2499.46	4189.58	-12576.2
232	-0.256025	0.430388	-1.27688		232	-2497.88	4199.03	-12457.7
232.1	-0.255567	0.431335	-1.26641		232.1	-2493.41	4208.27	-12355.6
232.2	-0.253881	0.43162	-1.25729		232.2	-2476.96	4211.05	-12266.6
232.3	-0.251428	0.430865	-1.24939		232.3	-2453.02	4203.68	-12189.5
232.4	-0.247939	0.430184	-1.24215		232.4	-2418.99	4197.04	-12118.9
232.5	-0.242837	0.42965	-1.23397		232.5	-2369.21	4191.83	-12039.1
232.6	-0.237741	0.429149	-1.22472		232.6	-2319.49	4186.94	-11948.9
232.7	-0.232321	0.428439	-1.21511		232.7	-2266.61	4180.01	-11855.1
232.8	-0.227643	0.426723	-1.20533		232.8	-2220.97	4163.28	-11759.7
232.9	-0.224238	0.42417	-1.19554		232.9	-2187.76	4138.36	-11664.1
233	-0.22216	0.420616	-1.18568		233	-2167.47	4103.69	-11567.9
233.1	-0.220721	0.416426	-1.1755		233.1	-2153.43	4062.81	-11468.6
233.2	-0.218531	0.412186	-1.16436		233.2	-2132.08	4021.44	-11360
233.3	-0.21525	0.408215	-1.15317		233.3	-2100.06	3982.7	-11250.8
233.4	-0.210843	0.404451	-1.14293		233.4	-2057.06	3945.98	-11150.9
233.5	-0.205261	0.40088	-1.13437		233.5	-2002.6	3911.14	-11067.3
233.6	-0.198832	0.397284	-1.12685		233.6	-1939.89	3876.05	-10994
233.7	-0.192001	0.393808	-1.11888		233.7	-1873.23	3842.14	-10916.2
233.8	-0.185733	0.389993	-1.10985		233.8	-1812.08	3804.93	-10828.2
233.9	-0.179988	0.386489	-1.09979		233.9	-1756.03	3770.74	-10730
234	-0.174773	0.38368	-1.08865		234	-1705.15	3743.33	-10621.3
234.1	-0.170475	0.381207	-1.07759		234.1	-1663.22	3719.2	-10513.4
234.2	-0.166409	0.379335	-1.06716		234.2	-1623.55	3700.94	-10411.6
234.3	-0.161755	0.377181	-1.05713		234.3	-1578.14	3679.92	-10313.8
234.4	-0.156441	0.375106	-1.04729		234.4	-1526.3	3659.68	-10217.7
234.5	-0.151262	0.373308	-1.03804		234.5	-1475.77	3642.14	-10127.5
234.6	-0.147604	0.371685	-1.02958		234.6	-1440.08	3626.3	-10045
234.7	-0.145013	0.36997	-1.022		234.7	-1414.8	3609.57	-9971.07
234.8	-0.143881	0.367913	-1.01534		234.8	-1403.76	3589.5	-9906.09
234.9	-0.144202	0.364872	-1.01007		234.9	-1406.89	3559.83	-9854.63
235	-0.146083	0.360209	-1.00569		235	-1425.24	3514.34	-9811.91
235.1	-0.150455	0.354935	-1.00224		235.1	-1467.89	3462.88	-9778.19
235.2	-0.157778	0.348895	-0.999262		235.2	-1539.35	3403.95	-9749.18
235.3	-0.166657	0.342541	-0.99623		235.3	-1625.97	3341.96	-9719.6
235.4	-0.175828	0.335672	-0.993175		235.4	-1715.44	3274.95	-9689.79
235.5	-0.18478	0.328659	-0.989626		235.5	-1802.78	3206.52	-9655.17
235.6	-0.194368	0.322076	-0.985485		235.6	-1896.33	3142.29	-9614.77
235.7	-0.204577	0.315042	-0.980869		235.7	-1995.93	3073.67	-9569.73
235.8	-0.214913	0.307465	-0.976752		235.8	-2096.77	2999.75	-9529.57
235.9	-0.225344	0.299264	-0.972832		235.9	-2198.54	2919.73	-9491.32
236	-0.235467	0.290838	-0.968822		236	-2297.31	2837.52	-9452.2
236.1	-0.246485	0.282852	-0.963901		236.1	-2404.8	2759.61	-9404.19
236.2	-0.257174	0.274974	-0.957939		236.2	-2509.09	2682.75	-9346.02
236.3	-0.266524	0.26758	-0.950575		236.3	-2600.31	2610.61	-9274.18
236.4	-0.274515	0.259579	-0.941863		236.4	-2678.27	2532.56	-9189.18
236.5	-0.281258	0.251097	-0.932092		236.5	-2744.06	2449.8	-9093.84
236.6	-0.286789	0.242363	-0.921417		236.6	-2798.03	2364.59	-8989.69
236.7	-0.290568	0.233143	-0.909852		236.7	-2834.9	2274.63	-8876.87
236.8	-0.29162	0.222575	-0.897386		236.8	-2845.15	2171.53	-8755.24
236.9	-0.290676	0.211563	-0.884711		236.9	-2835.94	2064.09	-8631.58
237	-0.288783	0.200552	-0.871934		237	-2817.48	1956.67	-8506.93
237.1	-0.28697	0.18983	-0.859154		237.1	-2799.79	1852.06	-8382.24
237.2	-0.285217	0.17874	-0.846278		237.2	-2782.68	1743.86	-8256.61
237.3	-0.282425	0.167422	-0.833683		237.3	-2755.44	1633.44	-8133.73
237.4	-0.278877	0.15632	-0.820767		237.4	-2720.83	1525.12	-8007.72
237.5	-0.274765	0.144996	-0.807336		237.5	-2680.71	1414.64	-7876.68
237.6	-0.271271	0.133876	-0.794098		237.6	-2646.62	1306.15	-7747.52
237.7	-0.267986	0.122576	-0.781566		237.7	-2614.58	1195.9	-7625.26
237.8	-0.264144	0.111215	-0.769679		237.8	-2577.09	1085.05	-7509.29
237.9	-0.259445	0.100053	-0.758263		237.9	-2531.25	976.156	-7397.91
238	-0.254425	0.0889436	-0.747107		238	-2482.27	867.768	-7289.06
238.1	-0.249132	0.0784636	-0.736075		238.1	-2430.62	765.521	-7181.43
238.2	-0.243288	0.0687324	-0.725213		238.2	-2373.61	670.579	-7075.46
238.3	-0.237594	0.0590651	-0.714294		238.3	-2318.06	576.262	-6968.93
238.4	-0.232612	0.0503937	-0.703292		238.4	-2269.45	491.66	-6861.59
238.5	-0.229206	0.043066	-0.692028		238.5	-2236.22	420.169	-6751.7
238.6	-0.227314	0.0350291	-0.680297		238.6	-2217.76	341.757	-6637.24
238.7	-0.226331	0.0261906	-0.668713		238.7	-2208.17	255.525	-6524.22
238.8	-0.225478	0.0172711	-0.657883		238.8	-2199.85	168.503	-6418.56
238.9	-0.225171	0.00877655	-0.647955		238.9	-2196.85	85.6273	-6321.7
239	-0.22519	0.000153121	-0.63894		239	-2197.04	1.49391	-6233.75
239.1	-0.225601	-0.00812184	-0.630207		239.1	-2201.05	-79.2398	-6148.54
239.2	-0.225483	-0.0158306	-0.621072		239.2	-2199.9	-154.45	-6059.42
239.3	-0.224597	-0.0231746	-0.611455		239.3	-2191.26	-226.101	-5965.59
239.4	-0.222723	-0.03027	-0.601685		239.4	-2172.97	-295.326	-5870.27
239.5	-0.219974	-0.037281	-0.591522		239.5	-2146.15	-363.727	-5771.12
239.6	-0.217039	-0.0441427	-0.580867		239.6	-2117.52	-430.674	-5667.16
239.7	-0.214391	-0.0512541	-0.569869		239.7	-2091.68	-500.054	-5559.86
239.8	-0.212526	-0.0586478	-0.558482		239.8	-2073.48	-572.191	-5448.77
239.9	-0.211003	-0.0655785	-0.547059		239.9	-2058.63	-639.809	-5337.32
240	-0.209381	-0.0725263	-0.536021		240	-2042.81	-707.594	-5229.63
240.1	-0.207426	-0.0801397	-0.525088		240.1	-2023.73	-781.873	-5122.96
240.2	-0.204833	-0.0876945	-0.51461		240.2	-1998.43	-855.581	-5020.73
240.3	-0.201338	-0.093625	-0.504547		240.3	-1964.33	-913.441	-4922.55
240.4	-0.197548	-0.0978187	-0.494737		240.4	-1927.35	-954.356	-4826.85
240.5	-0.193495	-0.100928	-0.48443		240.5	-1887.81	-984.696	-4726.28
240.6	-0.18924	-0.103557	-0.473347		240.6	-1846.3	-1010.34	-4618.15
240.7	-0.185713	-0.105567	-0.462052		240.7	-1811.89	-1029.95	-4507.95
240.8	-0.183173	-0.107432	-0.451077		240.8	-1787.11	-1048.15	-4400.88
240.9	-0.182281	-0.109121	-0.440317		240.9	-1778.41	-1064.62	-4295.9
241	-0.182973	-0.110353	-0.429524		241	-1785.16	-1076.65	-4190.6
241.1	-0.184807	-0.111225	-0.418678		241.1	-1803.04	-1085.15	-4084.78
241.2	-0.187134	-0.111683	-0.408078		241.2	-1825.76	-1089.62	-3981.36
241.3	-0.18947	-0.11191	-0.398331		241.3	-1848.54	-1091.84	-3886.27
241.4	-0.191562	-0.11067	-0.389228		241.4	-1868.96	-1079.74	-3797.46
241.5	-0.193304	-0.108191	-0.380954		241.5	-1885.95	-1055.55	-3716.73
241.6	-0.195164	-0.105079	-0.372629		241.6	-1904.1	-1025.19	-3635.51
241.7	-0.197279	-0.100494	-0.364205		241.7	-1924.73	-980.461	-3553.33
241.8	-0.199801	-0.0950145	-0.355393		241.8	-1949.34	-926.997	-3467.35
241.9	-0.202829	-0.089373	-0.346612		241.9	-1978.88	-871.957	-3381.68
242	-0.2063	-0.0831098	-0.337459		242	-2012.74	-810.851	-3292.38
242.1	-0.209986	-0.0770539	-0.327884		242.1	-2048.71	-751.767	-3198.96
242.2	-0.213191	-0.0706152	-0.31835		242.2	-2079.98	-688.949	-3105.95
242.3	-0.215782	-0.0640399	-0.309184		242.3	-2105.25	-624.798	-3016.52
242.4	-0.217185	-0.0572879	-0.299679		242.4	-2118.94	-558.922	-2923.78
242.5	-0.217291	-0.0500958	-0.290184		242.5	-2119.97	-488.754	-2831.14
242.6	-0.216562	-0.0425525	-0.280311		242.6	-2112.86	-415.159	-2734.82
242.7	-0.214792	-0.0344416	-0.270409		242.7	-2095.59	-336.026	-2638.21
242.8	-0.211835	-0.0260527	-0.259698		242.8	-2066.74	-254.18	-2533.72
242.9	-0.208285	-0.0175545	-0.248319		242.9	-2032.11	-171.268	-2422.7
243	-0.204114	-0.00867434	-0.236264		243	-1991.42	-84.6302	-2305.08
243.1	-0.199706	0.000101477	-0.223697		243.1	-1948.41	0.990052	-2182.47
243.2	-0.195578	0.00880809	-0.21095		243.2	-1908.13	85.9351	-2058.11
243.3	-0.191728	0.0179347	-0.198514		243.3	-1870.57	174.978	-1936.78
243.4	-0.187368	0.0270292	-0.186553		243.4	-1828.03	263.707	-1820.09
243.5	-0.182012	0.0362664	-0.174683		243.5	-1775.78	353.829	-1704.28
243.6	-0.175964	0.0454378	-0.162021		243.6	-1716.77	443.308	-1580.74
243.7	-0.170007	0.0544249	-0.149357		243.7	-1658.65	530.99	-1457.19
243.8	-0.163978	0.0634396	-0.136823		243.8	-1599.84	618.941	-1334.9
243.9	-0.158134	0.0724473	-0.124246		243.9	-1542.81	706.823	-1212.19
244	-0.152547	0.0816377	-0.111624		244	-1488.31	796.489	-1089.04
244.1	-0.147527	0.0906474	-0.0993474		244.1	-1439.33	884.391	-969.271
244.2	-0.143113	0.0987989	-0.086702		244.2	-1396.26	963.92	-845.898
244.3	-0.139237	0.105856	-0.0741622		244.3	-1358.45	1032.77	-723.555
244.4	-0.136578	0.112048	-0.0623892		244.4	-1332.5	1093.18	-608.693
244.5	-0.13551	0.116909	-0.0520533		244.5	-1322.09	1140.61	-507.852
244.6	-0.135592	0.120682	-0.0427093		244.6	-1322.89	1177.42	-416.688
244.7	-0.136733	0.123341	-0.0342833		244.7	-1334.02	1203.36	-334.481
244.8	-0.138127	0.12506	-0.0269287		244.8	-1347.62	1220.13	-262.727
244.9	-0.139585	0.126424	-0.0202996		244.9	-1361.84	1233.44	-198.05
245	-0.141299	0.127176	-0.0137246		245	-1378.57	1240.78	-133.902
245.1	-0.143516	0.127611	-0.00743029		245.1	-1400.2	1245.02	-72.4927
245.2	-0.145645	0.127958	-0.00170451		245.2	-1420.97	1248.41	-16.6299
245.3	-0.147272	0.127161	0.00415665		245.3	-1436.84	1240.63	40.5539
245.4	-0.148369	0.125404	0.0104067		245.4	-1447.54	1223.49	101.531
245.5	-0.1493	0.12331	0.0164206		245.5	-1456.63	1203.06	160.206
245.6	-0.149896	0.120837	0.0223918		245.6	-1462.44	1178.93	218.463
245.7	-0.150052	0.11855	0.0281672		245.7	-1463.96	1156.62	274.81
245.8	-0.14929	0.11689	0.0337574		245.8	-1456.53	1140.42	329.351
245.9	-0.147702	0.116265	0.0385831		245.9	-1441.03	1134.32	376.432
246	-0.145361	0.116623	0.0436919		246	-1418.19	1137.82	426.275
246.1	-0.142748	0.117545	0.0489577		246.1	-1392.71	1146.81	477.65
246.2	-0.139303	0.118789	0.0542641		246.2	-1359.1	1158.95	529.421
246.3	-0.135498	0.120462	0.0597198		246.3	-1321.97	1175.27	582.649
246.4	-0.131507	0.122483	0.065978		246.4	-1283.04	1194.99	643.707
246.5	-0.127378	0.12433	0.0730483		246.5	-1242.75	1213.01	712.687
246.6	-0.122101	0.126171	0.0801177		246.6	-1191.26	1230.98	781.659
246.7	-0.115603	0.128175	0.0870121		246.7	-1127.87	1250.53	848.924
246.8	-0.108591	0.130482	0.093794		246.8	-1059.46	1273.04	915.091
246.9	-0.101386	0.13294	0.0996679		246.9	-989.165	1297.02	972.398
247	-0.093843	0.135699	0.104194		247	-915.568	1323.94	1016.56
247.1	-0.0857242	0.137911	0.107856		247.1	-836.359	1345.51	1052.29
247.2	-0.0779156	0.139381	0.111469		247.2	-760.175	1359.85	1087.53
247.3	-0.0710834	0.140246	0.114366		247.3	-693.517	1368.3	1115.79
247.4	-0.0652307	0.140562	0.116865		247.4	-636.416	1371.37	1140.18
247.5	-0.0602119	0.139959	0.119132		247.5	-587.45	1365.49	1162.3
247.6	-0.0559367	0.138609	0.12127		247.6	-545.74	1352.32	1183.15
247.7	-0.0517935	0.135983	0.123192		247.7	-505.317	1326.7	1201.91
247.8	-0.0475515	0.133231	0.125349		247.8	-463.931	1299.86	1222.95
247.9	-0.0438447	0.130907	0.127169		247.9	-427.766	1277.18	1240.71
248	-0.0407517	0.129261	0.128445		248	-397.59	1261.12	1253.16
248.1	-0.0381966	0.128154	0.129763		248.1	-372.66	1250.32	1266.01
248.2	-0.0362851	0.127727	0.131318		248.2	-354.011	1246.15	1281.19
248.3	-0.0356629	0.127466	0.133304		248.3	-347.941	1243.61	1300.57
248.4	-0.0359603	0.126872	0.135112		248.4	-350.842	1237.81	1318.21
248.5	-0.0364684	0.12579	0.137169		248.5	-355.799	1227.26	1338.27
248.6	-0.037365	0.124301	0.139694		248.6	-364.547	1212.73	1362.91
248.7	-0.0390819	0.122772	0.143263		248.7	-381.298	1197.81	1397.72
248.8	-0.0414755	0.121396	0.147464		248.8	-404.651	1184.38	1438.71
248.9	-0.0437111	0.120312	0.152231		248.9	-426.462	1173.81	1485.22
249	-0.0451407	0.119092	0.157709		249	-440.41	1161.91	1538.67
249.1	-0.0458258	0.11782	0.163102		249.1	-447.094	1149.5	1591.29
249.2	-0.0462456	0.1162	0.168526		249.2	-451.19	1133.69	1644.2
249.3	-0.0468214	0.114247	0.173465		249.3	-456.807	1114.64	1692.39
249.4	-0.0474694	0.112631	0.177563		249.4	-463.129	1098.87	1732.37
249.5	-0.0482257	0.110374	0.18129		249.5	-470.508	1076.85	1768.74
249.6	-0.0484889	0.107178	0.184936		249.6	-473.076	1045.67	1804.31
249.7	-0.0478077	0.103326	0.188155		249.7	-466.43	1008.09	1835.72
249.8	-0.0464122	0.0990665	0.190754		249.8	-452.815	966.531	1861.07
249.9	-0.0443093	0.0942332	0.193006		249.9	-432.298	919.375	1883.04
250	-0.0420305	0.0893668	0.195199		250	-410.066	871.897	1904.43
250.1	-0.0400947	0.0850927	0.197394		250.1	-391.179	830.197	1925.85
250.2	-0.0379029	0.0811351	0.19924		250.2	-369.795	791.585	1943.86
250.3	-0.0345508	0.0772591	0.20058		250.3	-337.091	753.769	1956.94
250.4	-0.0303669	0.0733645	0.201154		250.4	-296.272	715.772	1962.54
250.5	-0.0255032	0.0692199	0.200805		250.5	-248.819	675.336	1959.13
250.6	-0.0207996	0.0653159	0.199861		250.6	-202.929	637.247	1949.92
250.7	-0.01628	0.0616797	0.198333		250.7	-158.834	601.771	1935.01
250.8	-0.0112714	0.0582239	0.196325		250.8	-109.968	568.055	1915.42
250.9	-0.00572025	0.055426	0.194261		250.9	-55.8089	540.758	1895.29
251	0.000278476	0.0530272	0.19252		251	2.71692	517.354	1878.3
251.1	0.00631848	0.0507568	0.191228		251.1	61.6455	495.203	1865.7
251.2	0.0124022	0.0482279	0.189975		251.2	121.001	470.53	1853.47
251.3	0.0183394	0.0459742	0.188901		251.3	178.926	448.542	1842.99
251.4	0.024501	0.0435861	0.187929		251.4	239.041	425.243	1833.51
251.5	0.0310979	0.0412115	0.186581		251.5	303.403	402.075	1820.35
251.6	0.0381372	0.0384532	0.184661		251.6	372.081	375.164	1801.62
251.7	0.0461224	0.0351566	0.182786		251.7	449.987	343.001	1783.33
251.8	0.0542256	0.0316449	0.181012		251.8	529.046	308.739	1766.02
251.9	0.0615321	0.0283376	0.17929		251.9	600.331	276.473	1749.22
252	0.0676678	0.0253658	0.177204		252	660.193	247.478	1728.87
252.1	0.0732315	0.0226488	0.174731		252.1	714.475	220.97	1704.74
252.2	0.0786579	0.0198026	0.1719		252.2	767.416	193.202	1677.12
252.3	0.0838605	0.0165092	0.168669		252.3	818.175	161.07	1645.6
252.4	0.0883699	0.0126321	0.165681		252.4	862.171	123.244	1616.44
252.5	0.092566	0.00869513	0.163177		252.5	903.11	84.833	1592.02
252.6	0.0963595	0.00498161	0.161255		252.6	940.121	48.6025	1573.26
252.7	0.100038	0.00140879	0.159993		252.7	976.009	13.7447	1560.95
252.8	0.10356	-0.00158007	0.159297		252.8	1010.37	-15.4158	1554.16
252.9	0.106966	-0.00416489	0.159029		252.9	1043.6	-40.6343	1551.55
253	0.110176	-0.00701746	0.158682		253	1074.92	-68.465	1548.16
253.1	0.112701	-0.010445	0.158414		253.1	1099.55	-101.906	1545.54
253.2	0.114469	-0.0144833	0.158477		253.2	1116.8	-141.305	1546.16
253.3	0.115175	-0.01911	0.158899		253.3	1123.7	-186.445	1550.27
253.4	0.11566	-0.0238181	0.159269		253.4	1128.42	-232.378	1553.89
253.5	0.11651	-0.0287502	0.15958		253.5	1136.71	-280.498	1556.93
253.6	0.1182	-0.033467	0.159864		253.6	1153.2	-326.517	1559.69
253.7	0.120494	-0.0373151	0.160482		253.7	1175.59	-364.061	1565.72
253.8	0.122739	-0.0399421	0.161541		253.8	1197.49	-389.69	1576.06
253.9	0.125013	-0.0413945	0.162983		253.9	1219.67	-403.86	1590.12
254	0.127627	-0.0419511	0.164728		254	1245.18	-409.291	1607.15
254.1	0.130425	-0.0417644	0.166622		254.1	1272.47	-407.469	1625.63
254.2	0.132935	-0.0416437	0.167984		254.2	1296.97	-406.292	1638.92
254.3	0.135252	-0.0414801	0.168432		254.3	1319.57	-404.695	1643.29
254.4	0.137416	-0.0413348	0.168083		254.4	1340.68	-403.278	1639.89
254.5	0.139481	-0.0410859	0.167657		254.5	1360.83	-400.85	1635.73
254.6	0.141764	-0.040584	0.167371		254.6	1383.1	-395.953	1632.93
254.7	0.14413	-0.0393371	0.16736		254.7	1406.19	-383.788	1632.83
254.8	0.146357	-0.0370842	0.167275		254.8	1427.92	-361.808	1632
254.9	0.148523	-0.0337843	0.166908		254.9	1449.05	-329.612	1628.41
255	0.15052	-0.0298091	0.166219		255	1468.53	-290.829	1621.69
255.1	0.151677	-0.02511	0.165316		255.1	1479.82	-244.983	1612.88
255.2	0.152286	-0.0197068	0.164456		255.2	1485.76	-192.267	1604.5
255.3	0.152153	-0.0142227	0.163468		255.3	1484.47	-138.762	1594.86
255.4	0.151583	-0.00917819	0.162608		255.4	1478.91	-89.546	1586.46
255.5	0.150991	-0.00531103	0.161961		255.5	1473.13	-51.8165	1580.15
255.6	0.150265	-0.00234736	0.161548		255.6	1466.04	-22.9018	1576.12
255.7	0.149395	-8.62264e-05	0.160973		255.7	1457.56	-0.841258	1570.52
255.8	0.148755	0.00148691	0.160675		255.8	1451.31	14.5068	1567.61
255.9	0.148373	0.00283104	0.160664		255.9	1447.58	27.6207	1567.5
256	0.148531	0.00368519	0.160685		256	1449.12	35.9541	1567.71
256.1	0.148716	0.00417741	0.160405		256.1	1450.93	40.7564	1564.97
256.2	0.149	0.00439777	0.159398		256.2	1453.71	42.9064	1555.15
256.3	0.14878	0.00468491	0.157607		256.3	1451.55	45.7078	1537.67
256.4	0.148124	0.00483565	0.155661		256.4	1445.16	47.1785	1518.69
256.5	0.147104	0.0050053	0.153671		256.5	1435.2	48.8337	1499.27
256.6	0.146021	0.00525432	0.151916		256.6	1424.64	51.2632	1482.15
256.7	0.145325	0.00602555	0.150029		256.7	1417.84	58.7876	1463.74
256.8	0.144947	0.00663819	0.148071		256.8	1414.16	64.7647	1444.64
256.9	0.144838	0.00699121	0.146369		256.9	1413.09	68.2089	1428.03
257	0.14536	0.00724126	0.144797		257	1418.18	70.6485	1412.69
257.1	0.146356	0.00722542	0.143159		257.1	1427.9	70.494	1396.72
257.2	0.147875	0.00780895	0.141276		257.2	1442.73	76.1871	1378.34
257.3	0.149776	0.00889633	0.139295		257.3	1461.27	86.796	1359.01
257.4	0.151377	0.0107261	0.137664		257.4	1476.89	104.648	1343.1
257.5	0.152455	0.0129969	0.136188		257.5	1487.41	126.803	1328.71
257.6	0.152853	0.0157153	0.135144		257.6	1491.3	153.325	1318.52
257.7	0.153106	0.0189232	0.134095		257.7	1493.76	184.622	1308.28
257.8	0.152895	0.0224367	0.132936		257.8	1491.7	218.901	1296.98
257.9	0.151934	0.0266707	0.131786		257.9	1482.32	260.21	1285.76
258	0.150806	0.0311623	0.131076		258	1471.32	304.031	1278.83
258.1	0.149817	0.0358157	0.130505		258.1	1461.68	349.432	1273.25
258.2	0.148992	0.040674	0.130374		258.2	1453.62	396.831	1271.98
258.3	0.147755	0.0455683	0.130594		258.3	1441.56	444.582	1274.12
258.4	0.146729	0.0498713	0.131149		258.4	1431.54	486.564	1279.54
258.5	0.145435	0.0541692	0.132035		258.5	1418.92	528.496	1288.18
258.6	0.143129	0.0584783	0.133172		258.6	1396.42	570.537	1299.28
258.7	0.139797	0.0627061	0.133944		258.7	1363.91	611.784	1306.81
258.8	0.13585	0.0667427	0.13435		258.8	1325.41	651.167	1310.77
258.9	0.13104	0.0706419	0.134306		258.9	1278.47	689.21	1310.34
259	0.125804	0.0740708	0.133689		259	1227.39	722.664	1304.32
259.1	0.12012	0.0770529	0.132191		259.1	1171.93	751.757	1289.7
259.2	0.114704	0.0795084	0.13008		259.2	1119.1	775.714	1269.11
259.3	0.11	0.0819394	0.127004		259.3	1073.2	799.432	1239.1
259.4	0.105968	0.0846608	0.123535		259.4	1033.86	825.983	1205.26
259.5	0.103168	0.0873804	0.120323		259.5	1006.55	852.516	1173.92
259.6	0.101277	0.0899358	0.117408		259.6	988.099	877.448	1145.47
259.7	0.0996994	0.0923713	0.114307		259.7	972.706	901.21	1115.22
259.8	0.0981959	0.0947906	0.111453		259.8	958.037	924.813	1087.37
259.9	0.0970469	0.0969136	0.108808		259.9	946.827	945.526	1061.57
260	0.0959437	0.0989444	0.1063		260	936.063	965.339	1037.1
260.1	0.0946599	0.101207	0.103906		260.1	923.538	987.418	1013.74
260.2	0.0936534	0.103526	0.101781		260.2	913.719	1010.04	993.017
260.3	0.0934133	0.106007	0.0997754		260.3	911.376	1034.25	973.447
260.4	0.0937191	0.109013	0.0978744		260.4	914.359	1063.57	954.9
260.5	0.0943074	0.112662	0.0960574		260.5	920.099	1099.17	937.172
260.6	0.0949799	0.116713	0.0948365		260.6	926.66	1138.69	925.261
260.7	0.0956892	0.121125	0.0940875		260.7	933.581	1181.74	917.953
260.8	0.0966797	0.125555	0.0936948		260.8	943.244	1224.96	914.122
260.9	0.0973084	0.130442	0.0937039		260.9	949.378	1272.64	914.211
261	0.097474	0.135017	0.0949202		261	950.993	1317.28	926.078
261.1	0.0969049	0.13904	0.0966222		261.1	945.441	1356.53	942.683
261.2	0.0958606	0.142734	0.0987616		261.2	935.253	1392.57	963.556
261.3	0.0946897	0.146086	0.101601		261.3	923.829	1425.27	991.255
261.4	0.0935747	0.149377	0.10482		261.4	912.951	1457.38	1022.67
261.5	0.0923043	0.152837	0.10745		261.5	900.556	1491.13	1048.32
261.6	0.0908726	0.15649	0.109713		261.6	886.588	1526.77	1070.41
261.7	0.0890931	0.15999	0.111856		261.7	869.227	1560.93	1091.31
261.8	0.0867837	0.163208	0.113716		261.8	846.695	1592.32	1109.45
261.9	0.0841808	0.166358	0.115034		261.9	821.3	1623.05	1122.31
262	0.0813011	0.16912	0.116046		262	793.205	1650	1132.19
262.1	0.077861	0.171193	0.117454		262.1	759.642	1670.23	1145.93
262.2	0.0738602	0.172569	0.119403		262.2	720.608	1683.65	1164.94
262.3	0.0701796	0.173644	0.121733		262.3	684.699	1694.14	1187.67
262.4	0.0668204	0.174422	0.124509		262.4	651.926	1701.73	1214.75
262.5	0.0638399	0.174803	0.127417		262.5	622.847	1705.45	1243.13
262.6	0.0598198	0.176386	0.12901		262.6	583.625	1720.89	1258.67
262.7	0.0536381	0.179907	0.132363		262.7	523.314	1755.25	1291.38
262.8	0.0484483	0.184446	0.134421		262.8	472.68	1799.53	1311.46
262.9	0.0450405	0.188228	0.135851		262.9	439.432	1836.43	1325.41
263	0.0443206	0.190613	0.136903		263	432.409	1859.69	1335.68
263.1	0.0458231	0.191682	0.137772		263.1	447.068	1870.12	1344.16
263.2	0.0489987	0.192642	0.137438		263.2	478.05	1879.49	1340.9
263.3	0.0543353	0.1931	0.134618		263.3	530.116	1883.96	1313.39
263.4	0.0579925	0.192209	0.129196		263.4	565.797	1875.26	1260.49
263.5	0.0601952	0.190053	0.122555		263.5	587.288	1854.23	1195.69
263.6	0.0612756	0.187246	0.116924		263.6	597.828	1826.84	1140.75
263.7	0.0604993	0.184182	0.111988		263.7	590.254	1796.95	1092.6
263.8	0.0577122	0.180994	0.108003		263.8	563.062	1765.85	1053.72
263.9	0.054548	0.179567	0.104226		263.9	532.191	1751.92	1016.87
264	0.0507683	0.178256	0.102205		264	495.315	1739.13	997.156
264.1	0.0454314	0.176973	0.102254		264.1	443.246	1726.61	997.628
264.2	0.0403048	0.176541	0.103296		264.2	393.229	1722.4	1007.8
264.3	0.0366489	0.175315	0.103246		264.3	357.56	1710.44	1007.31
264.4	0.0336851	0.17202	0.101574		264.4	328.645	1678.29	990.996
264.5	0.0326763	0.166826	0.0983262		264.5	318.802	1627.62	959.308
264.6	0.0315395	0.161473	0.0948447		264.6	307.711	1575.4	925.341
264.7	0.029527	0.156259	0.0925904		264.7	288.077	1524.52	903.347
264.8	0.0264739	0.150831	0.0900803		264.8	258.289	1471.56	878.858
264.9	0.0234564	0.14592	0.0885416		264.9	228.85	1423.65	863.846
265	0.0206677	0.1406	0.0900155		265	201.642	1371.75	878.226
265.1	0.0178167	0.136679	0.0945267		265.1	173.827	1333.49	922.239
265.2	0.0138827	0.133157	0.101175		265.2	135.445	1299.13	987.1
265.3	0.00988172	0.130746	0.108654		265.3	96.4098	1275.6	1060.07
265.4	0.00657224	0.129918	0.116152		265.4	64.1213	1267.53	1133.22
265.5	0.0049971	0.131762	0.122724		265.5	48.7537	1285.52	1197.35
265.6	0.00426395	0.13612	0.129366		265.6	41.6008	1328.04	1262.15
265.7	0.00413012	0.141144	0.135784		265.7	40.295	1377.05	1324.76
265.8	0.00618745	0.144693	0.140915		265.8	60.3671	1411.68	1374.82
265.9	0.00901411	0.146623	0.143893		265.9	87.9451	1430.51	1403.88
266	0.0140938	0.148256	0.146107		266	137.504	1446.44	1425.47
266.1	0.0202593	0.149589	0.147169		266.1	197.658	1459.45	1435.83
266.2	0.0257593	0.149396	0.14749		266.2	251.318	1457.56	1438.97
266.3	0.0314749	0.145803	0.146678		266.3	307.081	1422.51	1431.05
266.4	0.0376317	0.137641	0.14516		266.4	367.149	1342.88	1416.23
266.5	0.0442606	0.12556	0.14349		266.5	431.824	1225.01	1399.94
266.6	0.0509435	0.109727	0.140162		266.6	497.024	1070.54	1367.48
266.7	0.0565719	0.0938897	0.136238		266.7	551.937	916.024	1329.19
266.8	0.0615494	0.0804224	0.129849		266.8	600.5	784.631	1266.86
266.9	0.0643324	0.0690213	0.12402		266.9	627.652	673.398	1209.98
267	0.0649782	0.0590116	0.122024		267	633.952	575.74	1190.51
267.1	0.0653266	0.049385	0.124505		267.1	637.352	481.819	1214.72
267.2	0.0669069	0.0404438	0.133552		267.2	652.769	394.585	1302.99
267.3	0.0678783	0.0335332	0.142763		267.3	662.246	327.163	1392.85
267.4	0.0663477	0.0317097	0.154912		267.4	647.314	309.372	1511.38
267.5	0.0617238	0.033113	0.171143		267.5	602.201	323.063	1669.74
267.6	0.0553742	0.0336548	0.18633		267.6	540.252	328.349	1817.9
267.7	0.0489869	0.0350679	0.206119		267.7	477.935	342.136	2010.97
267.8	0.0456918	0.0351602	0.225464		267.8	445.786	343.036	2199.71
267.9	0.024175	0.029973	0.228393		267.9	235.86	292.428	2228.29
268	0.03349	0.0347023	0.251536		268	326.741	338.569	2454.08
268.1	0.0706147	0.0332978	0.200329		268.1	688.944	324.866	1954.49
268.2	0.0231709	0.0314803	0.259067		268.2	226.065	307.134	2527.56
268.3	0.0521292	0.0290378	0.184809		268.3	508.592	283.304	1803.07
268.4	0.0348572	0.0299204	0.20395		268.4	340.08	291.915	1989.81
268.5	0.0373017	0.0289056	0.189174		268.5	363.929	282.014	1845.65
268.6	0.0405414	0.0224591	0.152693		268.6	395.537	219.12	1489.74
268.7	0.0362991	0.0158855	0.100328		268.7	354.148	154.985	978.843
268.8	0.0317903	0.0130066	0.0486658		268.8	310.158	126.897	474.802
268.9	0.0251948	0.0116362	0.000324397		268.9	245.81	113.527	3.16494
269	0.0167246	0.0101258	-0.0580882		269	163.172	98.7909	-566.731
269.1	-0.000298081	0.00762952	-0.112814		269.1	-2.9082	74.4365	-1100.66
269.2	-0.0173736	0.00111931	-0.155029		269.2	-169.503	10.9204	-1512.52
269.3	-0.0381478	-0.00724933	-0.183564		269.3	-372.184	-70.7273	-1790.92
269.4	-0.0599661	-0.0183622	-0.20039		269.4	-585.053	-179.149	-1955.08
269.5	-0.0710246	-0.0266965	-0.209917		269.5	-692.943	-260.462	-2048.03
269.6	-0.0885405	-0.0320575	-0.218244		269.6	-863.835	-312.765	-2129.27
269.7	-0.106017	-0.0343971	-0.222464		269.7	-1034.34	-335.591	-2170.44
269.8	-0.134175	-0.0271221	-0.249743		269.8	-1309.06	-264.614	-2436.59
269.9	-0.167645	-0.0113151	-0.262537		269.9	-1635.61	-110.394	-2561.41
270	-0.183474	0.0311941	-0.23317		270	-1790.04	304.341	-2274.9

## Sheet: CD-1a
		015-001	015-002	015-003	015-004	015-005	015-006	015-007	015-008	015-009	015-010														C	2.93324e-05	M	Get your concentration
	Wavelength [nm]	Intensity	intensity	intensity	intensity	intensity	intensity	intensity	intensity	intensity	intensity		Wavelength [nm]	0	10	20	30	40	50	60	70	80	90		l	0.1
Input your raw data from Spectragryph	190	-2.77925	-3.09974	-1.45831	-0.409435	-1.83935	-1.06354	-0.927184	-2.62651	-1.06296	1.52448		190	-94750.2	-105676	-49716.7	-13958.4	-62706.9	-36258.1	-31609.5	-89542.7	-36238.3	51972.6
	190.1	-2.87904	-3.18448	-1.59508	-0.466789	-1.89155	-1.07369	-1.13465	-2.50926	-1.16343	1.5752		190.1	-98152.1	-108565	-54379.3	-15913.8	-64486.8	-36604.3	-38682.5	-85545.7	-39663.5	53701.8		A	0.6547	Input the following parameters
	190.2	-2.97645	-3.28018	-1.72552	-0.51791	-1.94782	-1.09221	-1.33215	-2.38147	-1.25811	1.60374		190.2	-101473	-111828	-58826.2	-17656.6	-66404.9	-37235.7	-45415.7	-81188.9	-42891.3	54674.5		# of Trp	4
	190.3	-3.06578	-3.38113	-1.8528	-0.560616	-2.00744	-1.11932	-1.52715	-2.24846	-1.34656	1.61957		190.3	-104518	-115269	-63165.4	-19112.5	-68437.5	-38159.6	-52063.6	-76654.2	-45906.9	55214.2		# of Tyr	0
	190.4	-3.15082	-3.48708	-1.97729	-0.605898	-2.06711	-1.14932	-1.72316	-2.1244	-1.44356	1.62893		190.4	-107418	-118881	-67409.7	-20656.3	-70471.8	-39182.6	-58746	-72425.1	-49213.8	55533.3
	190.5	-3.23216	-3.6056	-2.08988	-0.653915	-2.12224	-1.18135	-1.91758	-2.01012	-1.54152	1.64242		190.5	-110191	-122922	-71248.1	-22293.2	-72351.4	-40274.7	-65374	-68529	-52553.4	55993.3
	190.6	-3.30237	-3.73712	-2.18195	-0.699777	-2.1804	-1.21309	-2.11152	-1.89935	-1.62958	1.65891		190.6	-112584	-127406	-74386.9	-23856.8	-74334.3	-41356.6	-71985.9	-64752.4	-55555.6	56555.3
	190.7	-3.36614	-3.8773	-2.2615	-0.734584	-2.24644	-1.25177	-2.30131	-1.79289	-1.70634	1.67824		190.7	-114758	-132185	-77099	-25043.4	-76585.6	-42675.2	-78456.2	-61123.1	-58172.5	57214.5
	190.8	-3.42274	-4.01632	-2.33555	-0.768407	-2.33178	-1.29569	-2.48092	-1.68856	-1.78436	1.70812		190.8	-116688	-136924	-79623.6	-26196.5	-79495	-44172.6	-84579.5	-57566.2	-60832.4	58233.1
	190.9	-3.46977	-4.14961	-2.41122	-0.80156	-2.43424	-1.34733	-2.64872	-1.58421	-1.86407	1.75376		190.9	-118291	-141468	-82203.3	-27326.7	-82987.9	-45933	-90300.1	-54008.9	-63549.8	59789
	191	-3.50731	-4.27736	-2.49006	-0.835812	-2.54302	-1.40525	-2.8091	-1.49173	-1.94234	1.79684		191	-119571	-145823	-84891.1	-28494.5	-86696.5	-47907.8	-95767.8	-50856	-66218	61257.9
	191.1	-3.53609	-4.40089	-2.5675	-0.873218	-2.65402	-1.47339	-2.9537	-1.4098	-2.02312	1.82585		191.1	-120552	-150035	-87531.2	-29769.7	-90480.7	-50230.6	-100698	-48062.7	-68972.1	62246.7
	191.2	-3.55519	-4.52095	-2.63847	-0.911414	-2.76801	-1.55672	-3.07711	-1.3402	-2.10712	1.83285		191.2	-121204	-154128	-89950.7	-31071.9	-94366.9	-53071.8	-104905	-45690.2	-71835.7	62485.6
	191.3	-3.56039	-4.63902	-2.7034	-0.961044	-2.88162	-1.65349	-3.19077	-1.28296	-2.18609	1.8203		191.3	-121380	-158153	-92164.1	-32763.9	-98240	-56370.8	-108779	-43738.7	-74528	62057.7
	191.4	-3.56043	-4.76165	-2.76235	-1.02435	-2.99411	-1.76199	-3.29609	-1.24154	-2.26663	1.77731		191.4	-121382	-162334	-94173.7	-34922.1	-102075	-60069.7	-112370	-42326.6	-77273.8	60592
	191.5	-3.55835	-4.88478	-2.82026	-1.08922	-3.10618	-1.88775	-3.39006	-1.21332	-2.34976	1.69508		191.5	-121311	-166532	-96148.1	-37133.5	-105896	-64357.1	-115574	-41364.3	-80107.9	57788.4
	191.6	-3.54714	-5.01078	-2.877	-1.14619	-3.21438	-2.02648	-3.47531	-1.20144	-2.42155	1.58502		191.6	-120929	-170827	-98082.5	-39075.7	-109585	-69086.7	-118480	-40959.4	-82555.5	54036.6
	191.7	-3.52622	-5.13866	-2.9378	-1.20137	-3.32096	-2.17097	-3.55011	-1.20523	-2.48225	1.45856		191.7	-120216	-175187	-100155	-40957	-113218	-74012.7	-121030	-41088.7	-84624.7	49725.3
	191.8	-3.49365	-5.26701	-2.99762	-1.25867	-3.41831	-2.31184	-3.61207	-1.21614	-2.53919	1.31486		191.8	-119105	-179563	-102195	-42910.4	-116537	-78815.1	-123142	-41460.4	-86565.9	44826
	191.9	-3.45587	-5.39643	-3.05004	-1.31289	-3.50686	-2.45117	-3.65589	-1.23288	-2.59481	1.15281		191.9	-117817	-183975	-103982	-44759.1	-119556	-83565	-124636	-42031.2	-88462.2	39301.7
	192	-3.4153	-5.51963	-3.09994	-1.36694	-3.60122	-2.59343	-3.68125	-1.25693	-2.64168	0.967092		192	-116434	-188175	-105683	-46601.6	-122773	-88415	-125501	-42851.3	-90059.9	32970
	192.1	-3.36916	-5.63056	-3.14037	-1.41863	-3.69513	-2.7356	-3.68802	-1.285	-2.67263	0.759535		192.1	-114861	-191957	-107061	-48363.7	-125974	-93261.8	-125732	-43808.3	-91115.3	25894
	192.2	-3.31873	-5.72987	-3.16936	-1.47109	-3.78183	-2.88112	-3.68346	-1.32737	-2.69329	0.528259		192.2	-113142	-195342	-108050	-50152.2	-128930	-98223	-125576	-45252.7	-91819.6	18009.4
	192.3	-3.26614	-5.82023	-3.19287	-1.53045	-3.85918	-3.02379	-3.67347	-1.38519	-2.70726	0.28322		192.3	-111349	-198423	-108851	-52175.9	-131567	-103087	-125236	-47223.8	-92295.9	9655.51
	192.4	-3.2097	-5.90834	-3.21402	-1.59187	-3.92582	-3.16271	-3.66559	-1.46087	-2.71851	0.0244404		192.4	-109425	-201427	-109572	-54269.9	-133839	-107823	-124967	-49803.8	-92679.2	833.222
	192.5	-3.15699	-5.99734	-3.23314	-1.64697	-3.9829	-3.29416	-3.6594	-1.54771	-2.73522	-0.248467		192.5	-107628	-204461	-110224	-56148.5	-135785	-112304	-124756	-52764.4	-93248.9	-8470.73
	192.6	-3.11072	-6.08749	-3.2542	-1.70081	-4.03232	-3.42365	-3.651	-1.6469	-2.75648	-0.529002		192.6	-106051	-207534	-110942	-57984.1	-137470	-116719	-124470	-56146	-93973.8	-18034.7
	192.7	-3.06972	-6.17403	-3.27818	-1.75595	-4.07009	-3.54355	-3.64713	-1.74968	-2.77196	-0.804447		192.7	-104653	-210485	-111760	-59863.9	-138757	-120807	-124338	-59650.2	-94501.4	-27425.2
	192.8	-3.03472	-6.25554	-3.30322	-1.82156	-4.0982	-3.653	-3.65635	-1.8513	-2.77846	-1.0707		192.8	-103459	-213263	-112613	-62100.5	-139716	-124538	-124652	-63114.4	-94723	-36502.3
	192.9	-3.00662	-6.33025	-3.32659	-1.89672	-4.1199	-3.75626	-3.6757	-1.95195	-2.77932	-1.32827		192.9	-102502	-215811	-113410	-64663	-140456	-128058	-125312	-66545.7	-94752.5	-45283.5
	193	-2.98632	-6.39641	-3.35061	-1.98185	-4.14174	-3.85818	-3.69561	-2.05191	-2.77464	-1.576		193	-101809	-218066	-114229	-67565.3	-141200	-131533	-125991	-69953.8	-94593	-53729
	193.1	-2.96879	-6.45644	-3.37211	-2.08152	-4.16268	-3.95084	-3.72294	-2.15625	-2.7689	-1.80988		193.1	-101212	-220113	-114962	-70963.2	-141914	-134692	-126922	-73510.9	-94397.1	-61702.3
	193.2	-2.95741	-6.50968	-3.39443	-2.19033	-4.17558	-4.03587	-3.75156	-2.25919	-2.77338	-2.03362		193.2	-100824	-221928	-115723	-74672.6	-142354	-137591	-127898	-77020.2	-94550	-69330
	193.3	-2.95281	-6.55187	-3.43035	-2.30125	-4.17797	-4.12097	-3.77141	-2.36066	-2.79021	-2.24745		193.3	-100667	-223366	-116947	-78454.1	-142435	-140492	-128575	-80479.4	-95123.8	-76619.9
	193.4	-2.94981	-6.58483	-3.47575	-2.4159	-4.16505	-4.20401	-3.78297	-2.45712	-2.80317	-2.45394		193.4	-100565	-224490	-118495	-82362.9	-141995	-143323	-128969	-83768.1	-95565.5	-83659.6
	193.5	-2.95206	-6.60863	-3.5305	-2.5387	-4.1429	-4.27554	-3.79167	-2.55224	-2.8103	-2.63496		193.5	-100641	-225301	-120362	-86549.1	-141239	-145762	-129265	-87010.8	-95808.7	-89831.1
	193.6	-2.96251	-6.62364	-3.5939	-2.66558	-4.11047	-4.3374	-3.79758	-2.63909	-2.81238	-2.8018		193.6	-100998	-225813	-122523	-90874.8	-140134	-147870	-129467	-89971.8	-95879.7	-95518.7
	193.7	-2.98478	-6.63341	-3.66065	-2.79103	-4.07418	-4.39525	-3.79516	-2.71379	-2.8102	-2.95134		193.7	-101757	-226146	-124799	-95151.6	-138897	-149843	-129384	-92518.3	-95805.3	-100617
	193.8	-3.01877	-6.63595	-3.72828	-2.91427	-4.04188	-4.45313	-3.78216	-2.77519	-2.8036	-3.08042		193.8	-102916	-226233	-127104	-99353.1	-137795	-151816	-128941	-94611.5	-95580.3	-105018
	193.9	-3.06098	-6.63357	-3.79988	-3.02931	-4.01335	-4.50865	-3.75769	-2.82243	-2.79875	-3.19206		193.9	-104355	-226151	-129545	-103275	-136823	-153709	-128107	-96222.3	-95414.8	-108824
	194	-3.10858	-6.63337	-3.87906	-3.14146	-3.98359	-4.56261	-3.7232	-2.86343	-2.79844	-3.29059		194	-105978	-226145	-132245	-107098	-135808	-155548	-126931	-97619.8	-95404.1	-112183
	194.1	-3.16897	-6.64254	-3.958	-3.25548	-3.94447	-4.60735	-3.69162	-2.90055	-2.79866	-3.37487		194.1	-108037	-226457	-134936	-110986	-134475	-157074	-125854	-98885.5	-95411.6	-115056
	194.2	-3.23986	-6.65823	-4.03507	-3.37542	-3.89067	-4.63986	-3.67191	-2.94176	-2.79793	-3.4498		194.2	-110453	-226992	-137563	-115074	-132641	-158182	-125182	-100290	-95387	-117610
	194.3	-3.32413	-6.68424	-4.10617	-3.50656	-3.8249	-4.66732	-3.66849	-2.975	-2.79899	-3.51661		194.3	-113326	-227879	-139987	-119546	-130398	-159118	-125066	-101424	-95423.1	-119888
	194.4	-3.41902	-6.71616	-4.17523	-3.64644	-3.7577	-4.69888	-3.68345	-2.99388	-2.80518	-3.57356		194.4	-116561	-228967	-142342	-124314	-128107	-160194	-125576	-102067	-95634	-121830
	194.5	-3.52171	-6.75523	-4.24191	-3.79271	-3.68612	-4.72597	-3.71241	-2.99631	-2.81729	-3.62068		194.5	-120062	-230299	-144615	-129301	-125667	-161117	-126563	-102150	-96047	-123436
	194.6	-3.63138	-6.80317	-4.30414	-3.93418	-3.6137	-4.74271	-3.74714	-2.98878	-2.83581	-3.65951		194.6	-123801	-231933	-146737	-134124	-123198	-161688	-127747	-101893	-96678.4	-124760
	194.7	-3.74675	-6.85258	-4.36319	-4.06533	-3.54159	-4.75254	-3.78353	-2.97066	-2.85833	-3.69113		194.7	-127734	-233618	-148749	-138595	-120740	-162024	-128988	-101275	-97446.2	-125838
	194.8	-3.86878	-6.90553	-4.41502	-4.18739	-3.46877	-4.75585	-3.81824	-2.94047	-2.88605	-3.71466		194.8	-131894	-235423	-150517	-142756	-118257	-162136	-130171	-100246	-98391	-126640
	194.9	-3.99718	-6.96148	-4.45923	-4.30474	-3.40081	-4.75048	-3.84545	-2.90091	-2.92155	-3.72383		194.9	-136272	-237330	-152024	-146757	-115940	-161953	-131099	-98897.5	-99601.4	-126953
	195	-4.13191	-7.02205	-4.49302	-4.4161	-3.33707	-4.73297	-3.86104	-2.85025	-2.96918	-3.72262		195	-140865	-239395	-153176	-150553	-113767	-161356	-131630	-97170.6	-101225	-126911
	195.1	-4.27325	-7.08729	-4.51935	-4.51781	-3.27999	-4.70925	-3.86888	-2.79096	-3.02554	-3.7136		195.1	-145683	-241620	-154074	-154021	-111821	-160547	-131898	-95149.4	-103146	-126604
	195.2	-4.42275	-7.15958	-4.54579	-4.61485	-3.23331	-4.68585	-3.87465	-2.72683	-3.08426	-3.69986		195.2	-150780	-244084	-154975	-157329	-110230	-159750	-132094	-92963	-105149	-126135
	195.3	-4.57759	-7.23638	-4.57606	-4.70556	-3.19144	-4.663	-3.88449	-2.66972	-3.14196	-3.67769		195.3	-156059	-246702	-156007	-160422	-108802	-158971	-132430	-91016.1	-107115	-125380
	195.4	-4.737	-7.31715	-4.60889	-4.79033	-3.15486	-4.639	-3.90472	-2.62325	-3.19788	-3.64743		195.4	-161493	-249456	-157126	-163312	-107555	-158153	-133119	-89431.6	-109022	-124348
	195.5	-4.89432	-7.39968	-4.64481	-4.87257	-3.13098	-4.62311	-3.93274	-2.58377	-3.25296	-3.61187		195.5	-166857	-252270	-158351	-166115	-106741	-157611	-134075	-88085.8	-110900	-123136
	195.6	-5.04851	-7.48055	-4.68643	-4.95218	-3.12679	-4.61404	-3.96825	-2.54588	-3.30066	-3.57106		195.6	-172113	-255027	-159769	-168829	-106598	-157302	-135285	-86794	-112526	-121744
	195.7	-5.20804	-7.56235	-4.73602	-5.03761	-3.14372	-4.61075	-4.00262	-2.51407	-3.33945	-3.53019		195.7	-177552	-257815	-161460	-171742	-107175	-157189	-136457	-85709.6	-113848	-120351
	195.8	-5.36811	-7.64097	-4.79939	-5.1359	-3.18146	-4.6151	-4.03501	-2.48607	-3.36888	-3.48675		195.8	-183009	-260496	-163620	-175093	-108462	-157338	-137561	-84755.1	-114852	-118870
	195.9	-5.52301	-7.71385	-4.87046	-5.24233	-3.23411	-4.6242	-4.07402	-2.46543	-3.38906	-3.44303		195.9	-188290	-262980	-166043	-178721	-110257	-157648	-138891	-84051.3	-115540	-117380
	196	-5.67275	-7.77888	-4.94047	-5.35217	-3.29846	-4.63787	-4.11914	-2.4584	-3.4064	-3.40575		196	-193395	-265197	-168430	-182466	-112451	-158114	-140429	-83811.6	-116131	-116109
	196.1	-5.81991	-7.83988	-5.00813	-5.46801	-3.36891	-4.66266	-4.1573	-2.46584	-3.42758	-3.37112		196.1	-198412	-267277	-170737	-186415	-114853	-158959	-141731	-84065.5	-116853	-114928
	196.2	-5.96399	-7.89769	-5.07583	-5.58862	-3.44472	-4.69852	-4.19671	-2.48347	-3.45664	-3.33899		196.2	-203324	-269248	-173045	-190527	-117437	-160182	-143074	-84666.4	-117844	-113833
	196.3	-6.10168	-7.94892	-5.14457	-5.71547	-3.52329	-4.73934	-4.24559	-2.5088	-3.49022	-3.30384		196.3	-208018	-270994	-175388	-194852	-120116	-161573	-144741	-85529.8	-118988	-112634
	196.4	-6.24087	-7.99346	-5.21392	-5.83836	-3.60286	-4.78518	-4.30084	-2.5401	-3.53118	-3.27561		196.4	-212763	-272513	-177753	-199041	-122829	-163136	-146624	-86597.1	-120385	-111672
	196.5	-6.37703	-8.02734	-5.28857	-5.95241	-3.68777	-4.83823	-4.36135	-2.58001	-3.5731	-3.25505		196.5	-217405	-273668	-180298	-202929	-125723	-164945	-148687	-87957.5	-121814	-110971
	196.6	-6.50935	-8.05566	-5.363	-6.06515	-3.77912	-4.89482	-4.42815	-2.62739	-3.6128	-3.24246		196.6	-221917	-274633	-182835	-206773	-128838	-166874	-150964	-89572.7	-123168	-110542
	196.7	-6.64216	-8.08169	-5.42936	-6.18269	-3.88	-4.94857	-4.50267	-2.68192	-3.6479	-3.23804		196.7	-226444	-275521	-185098	-210780	-132277	-168706	-153505	-91432	-124364	-110391
	196.8	-6.77612	-8.10596	-5.48993	-6.30195	-3.98758	-5.00303	-4.58352	-2.7457	-3.68684	-3.24224		196.8	-231011	-276348	-187163	-214846	-135944	-170563	-156261	-93606.3	-125692	-110534
	196.9	-6.91295	-8.12615	-5.54405	-6.42157	-4.10015	-5.05939	-4.66984	-2.82177	-3.73181	-3.2573		196.9	-235676	-277036	-189007	-218924	-139782	-172485	-159204	-96199.7	-127225	-111048
	197	-7.05107	-8.14437	-5.59461	-6.54434	-4.21947	-5.11631	-4.75797	-2.90818	-3.77766	-3.28498		197	-240385	-277657	-190731	-223109	-143850	-174425	-162209	-99145.7	-128788	-111991
	197.1	-7.18633	-8.15547	-5.63886	-6.66465	-4.33637	-5.17222	-4.84747	-3.00156	-3.82838	-3.33248		197.1	-244996	-278036	-192240	-227211	-147835	-176331	-165260	-102329	-130517	-113611
	197.2	-7.32042	-8.15928	-5.68314	-6.78498	-4.45122	-5.23001	-4.94262	-3.11048	-3.88885	-3.3969		197.2	-249567	-278166	-193749	-231313	-151751	-178301	-168503	-106042	-132579	-115807
	197.3	-7.45217	-8.16452	-5.72812	-6.9074	-4.56231	-5.28376	-5.04386	-3.23223	-3.95967	-3.47203		197.3	-254059	-278344	-195283	-235487	-155538	-180134	-171955	-110193	-134993	-118368
	197.4	-7.58297	-8.16789	-5.77033	-7.02581	-4.67231	-5.33914	-5.14385	-3.35909	-4.03324	-3.55773		197.4	-258518	-278459	-196722	-239524	-159288	-182022	-175364	-114518	-137501	-121290
	197.5	-7.7095	-8.16951	-5.80759	-7.14251	-4.78297	-5.39929	-5.23621	-3.48942	-4.10877	-3.65333		197.5	-262832	-278515	-197992	-243502	-163061	-184072	-178513	-118961	-140076	-124549
	197.6	-7.8277	-8.17111	-5.84384	-7.25686	-4.89724	-5.46333	-5.31997	-3.6235	-4.18401	-3.75726		197.6	-266862	-278569	-199228	-247401	-166956	-186256	-181368	-123532	-142641	-128092
	197.7	-7.93621	-8.16838	-5.87786	-7.36538	-5.01068	-5.52163	-5.40048	-3.75892	-4.25655	-3.86496		197.7	-270561	-278476	-200388	-251100	-170824	-188243	-184113	-128149	-145114	-131764
	197.8	-8.03461	-8.16079	-5.90825	-7.46778	-5.11874	-5.5769	-5.47626	-3.89201	-4.32783	-3.9758		197.8	-273915	-278217	-201424	-254591	-174508	-190127	-186696	-132686	-147544	-135543
	197.9	-8.13088	-8.14856	-5.94009	-7.55845	-5.22298	-5.63441	-5.53679	-4.02703	-4.3929	-4.08647		197.9	-277198	-277800	-202509	-257682	-178061	-192088	-188760	-137289	-149762	-139316
	198	-8.22201	-8.13721	-5.97629	-7.63449	-5.32747	-5.69303	-5.58278	-4.16127	-4.45672	-4.19241		198	-280304	-277413	-203743	-260275	-181624	-194087	-190328	-141866	-151938	-142927
	198.1	-8.30846	-8.12511	-6.01753	-7.69284	-5.42801	-5.74473	-5.61523	-4.29243	-4.52357	-4.29421		198.1	-283252	-277001	-205149	-262264	-185051	-195849	-191434	-146337	-154217	-146398
	198.2	-8.38781	-8.11204	-6.06859	-7.73867	-5.52138	-5.79486	-5.63572	-4.41521	-4.59472	-4.39454		198.2	-285957	-276555	-206890	-263826	-188235	-197558	-192133	-150523	-156643	-149818
	198.3	-8.46038	-8.09774	-6.12943	-7.77629	-5.61006	-5.85231	-5.6505	-4.5328	-4.66555	-4.49218		198.3	-288431	-276068	-208964	-265109	-191258	-199517	-192636	-154532	-159058	-153147
	198.4	-8.52825	-8.08672	-6.19316	-7.80648	-5.69407	-5.92297	-5.66351	-4.6457	-4.73188	-4.58162		198.4	-290745	-275692	-211137	-266138	-194122	-201926	-193080	-158381	-161319	-156196
	198.5	-8.59446	-8.07484	-6.25698	-7.82948	-5.77228	-5.99836	-5.67074	-4.75511	-4.79679	-4.65942		198.5	-293002	-275287	-213313	-266922	-196788	-204496	-193327	-162111	-163532	-158849
	198.6	-8.65645	-8.06242	-6.31753	-7.8458	-5.8425	-6.07575	-5.67093	-4.85772	-4.8588	-4.73348		198.6	-295115	-274864	-215377	-267479	-199182	-207134	-193333	-165609	-165646	-161374
	198.7	-8.71423	-8.05653	-6.37433	-7.85952	-5.90827	-6.15059	-5.66254	-4.95016	-4.92011	-4.80009		198.7	-297085	-274663	-217314	-267946	-201424	-209686	-193047	-168761	-167736	-163644
	198.8	-8.76644	-8.05887	-6.42979	-7.87148	-5.96613	-6.22198	-5.65081	-5.03591	-4.9838	-4.85576		198.8	-298865	-274742	-219204	-268354	-203397	-212119	-192647	-171684	-169907	-165542
	198.9	-8.81746	-8.07184	-6.48565	-7.87814	-6.01363	-6.28737	-5.64181	-5.1164	-5.05815	-4.90437		198.9	-300605	-275185	-221108	-268581	-205016	-214349	-192340	-174428	-172442	-167200
	199	-8.86537	-8.0949	-6.53684	-7.87991	-6.04728	-6.34848	-5.63205	-5.19411	-5.1412	-4.94389		199	-302238	-275971	-222853	-268641	-206164	-216432	-192008	-177077	-175274	-168547
	199.1	-8.91178	-8.12238	-6.58031	-7.87486	-6.06648	-6.4073	-5.6273	-5.26705	-5.22741	-4.97374		199.1	-303820	-276908	-224336	-268469	-206818	-218437	-191846	-179564	-178212	-169564
	199.2	-8.95839	-8.15045	-6.61773	-7.87146	-6.07867	-6.46452	-5.61886	-5.33162	-5.313	-4.99372		199.2	-305409	-277865	-225611	-268353	-207234	-220388	-191558	-181765	-181131	-170246
	199.3	-9.00592	-8.18689	-6.65834	-7.87052	-6.08732	-6.52421	-5.60257	-5.38	-5.4009	-5.00181		199.3	-307029	-279107	-226996	-268322	-207529	-222423	-191003	-183415	-184127	-170522
	199.4	-9.04812	-8.23152	-6.70463	-7.86017	-6.09997	-6.58118	-5.57668	-5.41203	-5.49314	-5.0023		199.4	-308468	-280628	-228574	-267969	-207960	-224365	-190120	-184507	-187272	-170538
	199.5	-9.08505	-8.28338	-6.75475	-7.83301	-6.1179	-6.62993	-5.54029	-5.43798	-5.57955	-4.99666		199.5	-309727	-282397	-230283	-267043	-208571	-226027	-188879	-185391	-190218	-170346
	199.6	-9.1183	-8.34395	-6.80927	-7.78893	-6.14507	-6.67425	-5.49048	-5.46217	-5.65742	-4.98624		199.6	-310861	-284461	-232141	-265540	-209498	-227538	-187181	-186216	-192873	-169991
	199.7	-9.14675	-8.40698	-6.8673	-7.73589	-6.18157	-6.71502	-5.42875	-5.48435	-5.72834	-4.96931		199.7	-311830	-286610	-234120	-263731	-210742	-228928	-185077	-186972	-195290	-169414
	199.8	-9.16933	-8.47569	-6.92735	-7.68032	-6.22772	-6.75104	-5.35646	-5.50167	-5.79132	-4.94239		199.8	-312600	-288953	-236167	-261837	-212315	-230156	-182612	-187563	-197437	-168496
	199.9	-9.18727	-8.54952	-6.98926	-7.62478	-6.28579	-6.78182	-5.27547	-5.51813	-5.85156	-4.90575		199.9	-313212	-291470	-238278	-259943	-214295	-231206	-179851	-188124	-199491	-167247
	200	-9.20113	-8.62909	-7.05745	-7.57201	-6.35078	-6.81169	-5.1929	-5.53633	-5.9143	-4.86313		200	-313684	-294183	-240602	-258145	-216510	-232224	-177036	-188744	-201630	-165794
	200.1	-9.21399	-8.71104	-7.13672	-7.52393	-6.42073	-6.84282	-5.11541	-5.55866	-5.97373	-4.81909		200.1	-314123	-296976	-243305	-256505	-218895	-233285	-174394	-189505	-203656	-164292
	200.2	-9.22105	-8.79839	-7.22446	-7.48482	-6.49528	-6.87959	-5.04737	-5.58361	-6.02484	-4.77533		200.2	-314364	-299954	-246296	-255172	-221437	-234538	-172075	-190356	-205399	-162800
	200.3	-9.22001	-8.88807	-7.32198	-7.44972	-6.57022	-6.91868	-4.99223	-5.61394	-6.07005	-4.7339		200.3	-314328	-303012	-249621	-253976	-223992	-235871	-170195	-191390	-206940	-161388
	200.4	-9.21423	-8.97868	-7.4302	-7.42075	-6.64803	-6.96032	-4.94915	-5.6473	-6.11186	-4.69169		200.4	-314131	-306101	-253310	-252988	-226644	-237291	-168726	-192528	-208365	-159949
	200.5	-9.2036	-9.07222	-7.54399	-7.39976	-6.7305	-7.0037	-4.91681	-5.67651	-6.1467	-4.64859		200.5	-313769	-309290	-257189	-252272	-229456	-238770	-167624	-193523	-209553	-158479
	200.6	-9.19195	-9.16836	-7.65965	-7.38506	-6.81756	-7.04692	-4.89273	-5.69851	-6.16787	-4.59995		200.6	-313371	-312567	-261133	-251771	-232424	-240243	-166803	-194273	-210275	-156821
	200.7	-9.17947	-9.26058	-7.77896	-7.37967	-6.90653	-7.0899	-4.87795	-5.71671	-6.18196	-4.54863		200.7	-312946	-315711	-265200	-251587	-235457	-241708	-166299	-194894	-210755	-155072
	200.8	-9.16552	-9.34354	-7.90372	-7.37662	-6.99631	-7.12841	-4.87622	-5.7273	-6.19632	-4.49361		200.8	-312470	-318539	-269453	-251483	-238518	-243021	-166240	-195255	-211245	-153196
	200.9	-9.15701	-9.41483	-8.02781	-7.37473	-7.08381	-7.16107	-4.88503	-5.73451	-6.21486	-4.43287		200.9	-312180	-320970	-273684	-251419	-241501	-244135	-166540	-195501	-211877	-151125
	201	-9.15644	-9.47929	-8.15095	-7.37552	-7.16567	-7.1917	-4.89645	-5.73891	-6.23292	-4.37071		201	-312161	-323167	-277882	-251446	-244292	-245179	-166929	-195651	-212492	-149006
	201.1	-9.16346	-9.54395	-8.27172	-7.37877	-7.24638	-7.22429	-4.90801	-5.74352	-6.25004	-4.31088		201.1	-312400	-325372	-281999	-251557	-247043	-246290	-167324	-195808	-213076	-146966
	201.2	-9.17549	-9.60806	-8.39163	-7.38716	-7.32944	-7.25776	-4.93064	-5.74867	-6.26835	-4.2543		201.2	-312810	-327558	-286087	-251843	-249875	-247431	-168095	-195984	-213700	-145038
	201.3	-9.19296	-9.67016	-8.51084	-7.40812	-7.41068	-7.28898	-4.96348	-5.75657	-6.28499	-4.20307		201.3	-313406	-329674	-290151	-252557	-252645	-248496	-169215	-196253	-214268	-143291
	201.4	-9.22007	-9.73394	-8.62971	-7.44478	-7.49237	-7.32222	-5.00768	-5.76823	-6.29615	-4.15752		201.4	-314330	-331849	-294204	-253807	-255429	-249629	-170722	-196650	-214648	-141738
	201.5	-9.2578	-9.80089	-8.74668	-7.50015	-7.575	-7.35405	-5.0648	-5.78406	-6.29859	-4.11473		201.5	-315616	-334131	-298191	-255695	-258247	-250714	-172669	-197190	-214731	-140279
	201.6	-9.31057	-9.86931	-8.85949	-7.57463	-7.65724	-7.37677	-5.13297	-5.80225	-6.29157	-4.07591		201.6	-317415	-336464	-302037	-258234	-261050	-251488	-174993	-197810	-214492	-138956
	201.7	-9.37604	-9.93545	-8.96819	-7.66421	-7.73707	-7.38757	-5.21435	-5.82384	-6.27712	-4.04102		201.7	-319647	-338719	-305743	-261288	-263772	-251857	-177767	-198546	-213999	-137766
	201.8	-9.44687	-9.99702	-9.07751	-7.76572	-7.81525	-7.39573	-5.3029	-5.85272	-6.26302	-4.00979		201.8	-322062	-340818	-309470	-264749	-266437	-252135	-180786	-199531	-213519	-136701
	201.9	-9.52531	-10.0525	-9.18324	-7.87843	-7.89764	-7.39984	-5.39522	-5.88696	-6.25182	-3.97997		201.9	-324737	-342708	-313075	-268591	-269246	-252275	-183933	-200698	-213137	-135685
	202	-9.61169	-10.1007	-9.28435	-7.99872	-7.98267	-7.40523	-5.4902	-5.92472	-6.24345	-3.95473		202	-327681	-344353	-316522	-272692	-272145	-252459	-187172	-201985	-212851	-134825
	202.1	-9.70595	-10.1377	-9.37905	-8.11877	-8.06933	-7.41207	-5.58677	-5.96424	-6.23531	-3.93513		202.1	-330895	-345614	-319750	-276785	-275099	-252692	-190464	-203333	-212574	-134156
	202.2	-9.80574	-10.1684	-9.46918	-8.23941	-8.15732	-7.41618	-5.67837	-6.00678	-6.2228	-3.91968		202.2	-334297	-346659	-322823	-280897	-278099	-252832	-193587	-204783	-212147	-133629
	202.3	-9.90829	-10.1948	-9.55645	-8.35764	-8.24665	-7.41897	-5.76706	-6.04443	-6.20544	-3.90746		202.3	-337793	-347560	-325798	-284928	-281145	-252927	-196610	-206067	-211556	-133213
	202.4	-10.0125	-10.2146	-9.6367	-8.47099	-8.33988	-7.42229	-5.85588	-6.07742	-6.18154	-3.89832		202.4	-341347	-348235	-328534	-288793	-284323	-253040	-199638	-207191	-210741	-132901
	202.5	-10.1149	-10.2335	-9.71271	-8.57938	-8.42926	-7.42364	-5.94086	-6.10891	-6.15412	-3.89264		202.5	-344838	-348879	-331125	-292488	-287370	-253087	-202536	-208265	-209806	-132708
	202.6	-10.2166	-10.2528	-9.78355	-8.68137	-8.51077	-7.42226	-6.02229	-6.13767	-6.12544	-3.88762		202.6	-348302	-349538	-333540	-295965	-290149	-253039	-205311	-209245	-208828	-132537
	202.7	-10.3204	-10.2654	-9.84956	-8.7789	-8.58221	-7.42048	-6.10194	-6.16089	-6.0895	-3.87957		202.7	-351841	-349969	-335791	-299290	-292584	-252979	-208027	-210037	-207603	-132262
	202.8	-10.4278	-10.2765	-9.91121	-8.87425	-8.64589	-7.41686	-6.17909	-6.17691	-6.04705	-3.86927		202.8	-355503	-350347	-337893	-302540	-294755	-252855	-210657	-210583	-206156	-131911
	202.9	-10.5402	-10.287	-9.96624	-8.96793	-8.7071	-7.41149	-6.24984	-6.18649	-6.00522	-3.86202		202.9	-359338	-350702	-339769	-305734	-296842	-252672	-213069	-210909	-204730	-131664
	203	-10.6516	-10.3001	-10.016	-9.06148	-8.76605	-7.40611	-6.31894	-6.18973	-5.96633	-3.85481		203	-363133	-351152	-341464	-308924	-298852	-252489	-215425	-211020	-203404	-131418
	203.1	-10.7644	-10.3153	-10.0579	-9.15553	-8.8192	-7.4019	-6.38657	-6.18555	-5.93061	-3.85011		203.1	-366980	-351670	-342893	-312130	-300664	-252345	-217731	-210877	-202186	-131258
	203.2	-10.8793	-10.334	-10.0906	-9.25184	-8.86122	-7.40403	-6.45212	-6.17324	-5.89435	-3.84117		203.2	-370897	-352307	-344007	-315413	-302096	-252418	-219965	-210458	-200950	-130953
	203.3	-10.9936	-10.3505	-10.1118	-9.34759	-8.89679	-7.41268	-6.51727	-6.1513	-5.85539	-3.82479		203.3	-374794	-352868	-344730	-318677	-303309	-252713	-222186	-209710	-199622	-130395
	203.4	-11.1042	-10.3656	-10.1207	-9.44181	-8.92765	-7.42466	-6.57231	-6.11812	-5.81342	-3.79773		203.4	-378565	-353383	-345033	-321890	-304361	-253121	-224063	-208579	-198191	-129472
	203.5	-11.2105	-10.376	-10.1202	-9.53005	-8.95479	-7.43356	-6.61355	-6.07172	-5.76777	-3.76466		203.5	-382189	-353738	-345016	-324898	-305286	-253424	-225469	-206997	-196635	-128345
	203.6	-11.3137	-10.3842	-10.1129	-9.6135	-8.98009	-7.4389	-6.6414	-6.01618	-5.71944	-3.72647		203.6	-385707	-354018	-344770	-327743	-306149	-253606	-226418	-205103	-194987	-127043
	203.7	-11.4108	-10.3949	-10.0999	-9.69312	-9.00472	-7.44202	-6.6575	-5.95165	-5.66774	-3.68013		203.7	-389015	-354384	-344325	-330457	-306989	-253713	-226967	-202904	-193224	-125463
	203.8	-11.5025	-10.4062	-10.0845	-9.76718	-9.02662	-7.44492	-6.66803	-5.88275	-5.61628	-3.62387		203.8	-392142	-354768	-343800	-332982	-307735	-253812	-227326	-200554	-191470	-123545
	203.9	-11.5896	-10.4173	-10.0704	-9.83426	-9.04761	-7.45082	-6.67364	-5.81108	-5.56771	-3.56508		203.9	-395111	-355146	-343321	-335269	-308451	-254013	-227518	-198111	-189814	-121541
	204	-11.6703	-10.4284	-10.0563	-9.89322	-9.06634	-7.46206	-6.67326	-5.74139	-5.51602	-3.50737		204	-397863	-355523	-342838	-337279	-309089	-254396	-227504	-195735	-188052	-119573
	204.1	-11.751	-10.4422	-10.043	-9.94713	-9.08527	-7.4807	-6.66784	-5.67539	-5.46032	-3.45028		204.1	-400614	-355995	-342386	-339117	-309735	-255032	-227320	-193485	-186153	-117627
	204.2	-11.8265	-10.4652	-10.032	-9.99616	-9.10855	-7.50034	-6.6545	-5.60748	-5.40308	-3.39532		204.2	-403188	-356781	-342009	-340788	-310528	-255701	-226865	-191170	-184202	-115753
	204.3	-11.8932	-10.5013	-10.0254	-10.0356	-9.13681	-7.52056	-6.63668	-5.53803	-5.34766	-3.34282		204.3	-405463	-358010	-341787	-342135	-311492	-256391	-226257	-188802	-182312	-113963
	204.4	-11.9556	-10.5429	-10.0248	-10.0657	-9.17115	-7.5424	-6.61914	-5.47135	-5.29322	-3.29421		204.4	-407590	-359426	-341766	-343160	-312662	-257135	-225659	-186529	-180456	-112306
	204.5	-12.0149	-10.5854	-10.0325	-10.0903	-9.20656	-7.56668	-6.60198	-5.40537	-5.23501	-3.24927		204.5	-409613	-360879	-342026	-344000	-313870	-257963	-225074	-184280	-178472	-110774
	204.6	-12.0676	-10.628	-10.0454	-10.1131	-9.24471	-7.59313	-6.58696	-5.33542	-5.17434	-3.20695		204.6	-411408	-362330	-342468	-344776	-315170	-258865	-224562	-181895	-176403	-109331
	204.7	-12.1119	-10.6666	-10.0585	-10.1314	-9.28196	-7.62157	-6.57654	-5.26722	-5.11394	-3.16727		204.7	-412917	-363646	-342914	-345401	-316440	-259834	-224207	-179570	-174344	-107978
	204.8	-12.1467	-10.7032	-10.0708	-10.1466	-9.31735	-7.65383	-6.56914	-5.20351	-5.05595	-3.13191		204.8	-414106	-364894	-343334	-345919	-317647	-260934	-223955	-177398	-172367	-106773
	204.9	-12.1699	-10.7408	-10.0815	-10.1555	-9.35148	-7.69174	-6.56769	-5.14594	-5.00291	-3.10386		204.9	-414897	-366175	-343699	-346221	-318810	-262226	-223905	-175435	-170559	-105817
	205	-12.1835	-10.7776	-10.0976	-10.1601	-9.38243	-7.73181	-6.57103	-5.0887	-4.95284	-3.08345		205	-415358	-367430	-344247	-346378	-319865	-263593	-224019	-173484	-168852	-105121
	205.1	-12.192	-10.8184	-10.1172	-10.1634	-9.41081	-7.76834	-6.58045	-5.03047	-4.90091	-3.07286		205.1	-415649	-368821	-344917	-346490	-320833	-264838	-224341	-171499	-167081	-104760
	205.2	-12.193	-10.8661	-10.1383	-10.1642	-9.43381	-7.80467	-6.59427	-4.97036	-4.84674	-3.06919		205.2	-415684	-370447	-345633	-346518	-321617	-266076	-224812	-169449	-165235	-104635
	205.3	-12.189	-10.9184	-10.1651	-10.1595	-9.4506	-7.8372	-6.60937	-4.91041	-4.79072	-3.07342		205.3	-415548	-372230	-346546	-346356	-322190	-267186	-225326	-167405	-163325	-104779
	205.4	-12.1803	-10.9745	-10.1942	-10.1549	-9.46416	-7.8683	-6.62635	-4.84821	-4.73122	-3.07769		205.4	-415249	-374143	-347540	-346199	-322652	-268246	-225905	-165285	-161296	-104925
	205.5	-12.1683	-11.0334	-10.2207	-10.1505	-9.4761	-7.89712	-6.64636	-4.78484	-4.66893	-3.08302		205.5	-414842	-376150	-348445	-346049	-323059	-269228	-226587	-163125	-159173	-105106
	205.6	-12.1576	-11.0911	-10.2461	-10.1486	-9.48455	-7.92573	-6.66789	-4.72341	-4.60593	-3.0911		205.6	-414475	-378116	-349308	-345987	-323347	-270204	-227321	-161030	-157025	-105382
	205.7	-12.1478	-11.1457	-10.2771	-10.151	-9.48805	-7.95422	-6.68821	-4.66686	-4.54968	-3.10848		205.7	-414144	-379979	-350365	-346067	-323466	-271175	-228014	-159102	-155107	-105974
	205.8	-12.1413	-11.199	-10.3113	-10.1543	-9.49183	-7.98294	-6.70914	-4.61153	-4.50013	-3.13459		205.8	-413920	-381795	-351533	-346180	-323595	-272154	-228728	-157216	-153418	-106864
	205.9	-12.1348	-11.2509	-10.35	-10.1576	-9.49606	-8.01097	-6.73216	-4.56444	-4.45369	-3.1689		205.9	-413699	-383564	-352851	-346294	-323739	-273110	-229512	-155611	-151835	-108034
	206	-12.1293	-11.3048	-10.3915	-10.1637	-9.50205	-8.03975	-6.75491	-4.52385	-4.40903	-3.21389		206	-413510	-385404	-354267	-346500	-323943	-274091	-230288	-154227	-150313	-109568
	206.1	-12.1239	-11.3605	-10.4371	-10.1734	-9.50939	-8.06913	-6.78082	-4.48915	-4.37003	-3.26653		206.1	-413329	-387302	-355821	-346833	-324194	-275092	-231171	-153044	-148983	-111362
	206.2	-12.1185	-11.4158	-10.4924	-10.1949	-9.51476	-8.09622	-6.81178	-4.46218	-4.33486	-3.32159		206.2	-413144	-389187	-357705	-347563	-324377	-276016	-232227	-152124	-147784	-113240
	206.3	-12.1177	-11.469	-10.5552	-10.2257	-9.51404	-8.11955	-6.84805	-4.43602	-4.30085	-3.37762		206.3	-413117	-391001	-359847	-348613	-324352	-276811	-233464	-151232	-146624	-115150
	206.4	-12.1268	-11.5221	-10.6245	-10.2642	-9.5097	-8.14409	-6.8897	-4.41264	-4.26853	-3.43482		206.4	-413426	-392810	-362210	-349926	-324204	-277648	-234883	-150435	-145522	-117100
	206.5	-12.1406	-11.5734	-10.7004	-10.3054	-9.506	-8.16493	-6.93665	-4.39632	-4.23678	-3.49882		206.5	-413897	-394558	-364797	-351331	-324078	-278358	-236484	-149879	-144440	-119281
	206.6	-12.1557	-11.6227	-10.7837	-10.3452	-9.50225	-8.18116	-6.98714	-4.38788	-4.2063	-3.57217		206.6	-414410	-396240	-367638	-352688	-323950	-278912	-238205	-149591	-143401	-121782
	206.7	-12.1722	-11.6678	-10.8736	-10.3825	-9.49723	-8.19781	-7.04064	-4.38852	-4.17956	-3.65329		206.7	-414973	-397778	-370701	-353959	-323779	-279479	-240029	-149613	-142489	-124548
	206.8	-12.1901	-11.7125	-10.9683	-10.4172	-9.49237	-8.216	-7.09494	-4.40259	-4.16146	-3.73897		206.8	-415584	-399301	-373931	-355142	-323614	-280100	-241880	-150093	-141872	-127469
	206.9	-12.2141	-11.7555	-11.0675	-10.4524	-9.48818	-8.23437	-7.14977	-4.42337	-4.15101	-3.82724		206.9	-416403	-400769	-377314	-356341	-323471	-280726	-243750	-150801	-141516	-130478
	207	-12.2437	-11.7956	-11.1702	-10.4867	-9.47934	-8.25403	-7.20645	-4.44694	-4.1454	-3.92067		207	-417413	-402136	-380815	-357513	-323169	-281396	-245682	-151605	-141325	-133663
	207.1	-12.2762	-11.8335	-11.2714	-10.5214	-9.46944	-8.27386	-7.26019	-4.47306	-4.14182	-4.0147		207.1	-418519	-403427	-384263	-358694	-322832	-282072	-247514	-152495	-141203	-136869
	207.2	-12.3094	-11.8714	-11.371	-10.5611	-9.45768	-8.29276	-7.30839	-4.50033	-4.13956	-4.10788		207.2	-419650	-404720	-387661	-360047	-322431	-282717	-249157	-153425	-141126	-140046
	207.3	-12.3465	-11.9082	-11.4678	-10.6063	-9.44681	-8.30908	-7.35031	-4.52841	-4.13974	-4.19703		207.3	-420915	-405975	-390958	-361591	-322060	-283273	-250586	-154382	-141132	-143085
	207.4	-12.3843	-11.944	-11.5606	-10.6569	-9.43256	-8.32019	-7.38284	-4.55792	-4.14293	-4.27988		207.4	-422207	-407195	-394125	-363314	-321574	-283651	-251696	-155388	-141241	-145910
	207.5	-12.4234	-11.976	-11.653	-10.7126	-9.41397	-8.33093	-7.40384	-4.58919	-4.1504	-4.3573		207.5	-423539	-408285	-397275	-365215	-320941	-284018	-252411	-156454	-141495	-148549
	207.6	-12.4656	-11.9974	-11.7417	-10.7727	-9.39222	-8.34359	-7.41738	-4.6204	-4.15743	-4.42953		207.6	-424977	-409015	-400298	-367261	-320199	-284449	-252873	-157519	-141735	-151011
	207.7	-12.5136	-12.0105	-11.8257	-10.8371	-9.37103	-8.35615	-7.42568	-4.64793	-4.16112	-4.49778		207.7	-426611	-409462	-403161	-369458	-319477	-284878	-253156	-158457	-141861	-153338
	207.8	-12.5655	-12.0217	-11.9037	-10.904	-9.35242	-8.36179	-7.42947	-4.67257	-4.1653	-4.56211		207.8	-428381	-409843	-405821	-371740	-318842	-285070	-253285	-159297	-142003	-155531
	207.9	-12.6237	-12.031	-11.9743	-10.9721	-9.33414	-8.36445	-7.4281	-4.69879	-4.17347	-4.61877		207.9	-430367	-410160	-408229	-374059	-318219	-285161	-253238	-160191	-142282	-157463
	208	-12.6904	-12.0403	-12.0434	-11.0424	-9.31755	-8.3664	-7.4246	-4.7262	-4.18453	-4.66443		208	-432639	-410476	-410584	-376456	-317654	-285227	-253119	-161125	-142659	-159019
	208.1	-12.762	-12.0493	-12.1094	-11.1107	-9.30094	-8.36517	-7.41597	-4.75073	-4.19991	-4.7012		208.1	-435082	-410784	-412835	-378786	-317087	-285185	-252825	-161962	-143183	-160273
	208.2	-12.8377	-12.0558	-12.1746	-11.176	-9.28718	-8.3642	-7.40054	-4.77012	-4.21602	-4.7233		208.2	-437661	-411007	-415055	-381013	-316618	-285152	-252299	-162623	-143732	-161027
	208.3	-12.9151	-12.061	-12.2373	-11.2395	-9.28081	-8.36512	-7.37911	-4.78806	-4.23597	-4.73359		208.3	-440301	-411185	-417193	-383175	-316401	-285183	-251568	-163234	-144412	-161377
	208.4	-12.9946	-12.0664	-12.299	-11.2999	-9.28056	-8.37068	-7.34825	-4.8069	-4.25749	-4.73609		208.4	-443013	-411369	-419297	-385237	-316392	-285373	-250516	-163877	-145146	-161463
	208.5	-13.0795	-12.0715	-12.3618	-11.3573	-9.28534	-8.37982	-7.313	-4.82832	-4.27957	-4.73201		208.5	-445907	-411543	-421438	-387193	-316555	-285684	-249314	-164607	-145899	-161323
	208.6	-13.1683	-12.0771	-12.4251	-11.4142	-9.29519	-8.39211	-7.27705	-4.85298	-4.3019	-4.72053		208.6	-448933	-411732	-423597	-389133	-316891	-286103	-248089	-165447	-146660	-160932
	208.7	-13.2582	-12.0857	-12.4882	-11.4735	-9.30953	-8.40602	-7.24304	-4.88497	-4.32705	-4.70096		208.7	-451997	-412027	-425746	-391155	-317380	-286578	-246929	-166538	-147518	-160265
	208.8	-13.3494	-12.0975	-12.5558	-11.5338	-9.32666	-8.42391	-7.21294	-4.92105	-4.35594	-4.67622		208.8	-455108	-412427	-428051	-393211	-317964	-287188	-245903	-167768	-148502	-159421
	208.9	-13.44	-12.1135	-12.6254	-11.5932	-9.34813	-8.44538	-7.18513	-4.95931	-4.38649	-4.64643		208.9	-458195	-412972	-430425	-395236	-318696	-287919	-244955	-169073	-149544	-158406
	209	-13.5322	-12.135	-12.6941	-11.6488	-9.37341	-8.4688	-7.15895	-4.9988	-4.41345	-4.60565		209	-461339	-413707	-432767	-397129	-319558	-288718	-244063	-170419	-150463	-157016
	209.1	-13.6265	-12.1616	-12.7616	-11.7017	-9.40388	-8.49189	-7.13181	-5.03818	-4.43704	-4.55435		209.1	-464554	-414611	-435067	-398932	-320597	-289505	-243137	-171762	-151267	-155267
	209.2	-13.7222	-12.1922	-12.8285	-11.7552	-9.44017	-8.5191	-7.10213	-5.07363	-4.45661	-4.4963		209.2	-467818	-415655	-437350	-400758	-321834	-290433	-242125	-172970	-151934	-153288
	209.3	-13.8207	-12.2258	-12.8946	-11.8086	-9.48279	-8.55186	-7.07489	-5.10742	-4.47234	-4.43118		209.3	-471176	-416801	-439603	-402578	-323287	-291550	-241197	-174122	-152471	-151068
	209.4	-13.9217	-12.2592	-12.9597	-11.8623	-9.53146	-8.58782	-7.0502	-5.14251	-4.48101	-4.35952		209.4	-474617	-417941	-441821	-404410	-324946	-292775	-240355	-175318	-152766	-148624
	209.5	-14.0203	-12.2946	-13.0182	-11.9124	-9.58408	-8.62738	-7.02627	-5.17565	-4.48153	-4.28335		209.5	-477978	-419148	-443815	-406117	-326740	-294124	-239539	-176448	-152784	-146028
	209.6	-14.1142	-12.3356	-13.0687	-11.9583	-9.64267	-8.67052	-7.00219	-5.20878	-4.47414	-4.2047		209.6	-481181	-420544	-445536	-407682	-328738	-295595	-238718	-177578	-152532	-143346
	209.7	-14.2018	-12.3797	-13.1124	-11.9994	-9.7072	-8.71867	-6.97974	-5.24982	-4.46086	-4.12692		209.7	-484168	-422048	-447029	-409083	-330937	-297236	-237953	-178977	-152080	-140695
	209.8	-14.2845	-12.4278	-13.1513	-12.0408	-9.77759	-8.76924	-6.95646	-5.29117	-4.44155	-4.0473		209.8	-486988	-423688	-448355	-410493	-333337	-298960	-237159	-180386	-151421	-137980
	209.9	-14.3671	-12.4803	-13.186	-12.0821	-9.8549	-8.82172	-6.934	-5.32943	-4.41872	-3.96613		209.9	-489804	-425479	-449536	-411904	-335973	-300750	-236394	-181691	-150643	-135213
	210	-14.4496	-12.539	-13.2153	-12.1255	-9.93768	-8.87287	-6.91025	-5.36305	-4.39295	-3.883		210	-492614	-427478	-450534	-413381	-338795	-302493	-235584	-182837	-149764	-132379
	210.1	-14.531	-12.6041	-13.2387	-12.1716	-10.0248	-8.92263	-6.88619	-5.39262	-4.36337	-3.79649		210.1	-495391	-429697	-451335	-414955	-341766	-304190	-234764	-183845	-148756	-129430
	210.2	-14.6095	-12.6748	-13.2555	-12.2181	-10.1153	-8.97212	-6.86228	-5.41708	-4.3275	-3.70584		210.2	-498066	-432108	-451904	-416538	-344852	-305877	-233948	-184679	-147533	-126339
	210.3	-14.6856	-12.7483	-13.2662	-12.263	-10.2129	-9.01911	-6.83818	-5.44073	-4.28579	-3.61411		210.3	-500659	-434616	-452270	-418070	-348179	-307479	-233127	-185485	-146111	-123212
	210.4	-14.7606	-12.8239	-13.2745	-12.3088	-10.3146	-9.06669	-6.81544	-5.46451	-4.23806	-3.5251		210.4	-503218	-437191	-452553	-419632	-351643	-309101	-232352	-186296	-144484	-120178
	210.5	-14.8375	-12.8993	-13.2825	-12.3529	-10.4199	-9.11253	-6.79662	-5.4905	-4.18585	-3.4447		210.5	-505838	-439762	-452825	-421133	-355233	-310664	-231710	-187182	-142704	-117437
	210.6	-14.9113	-12.9756	-13.2935	-12.3971	-10.526	-9.15912	-6.78296	-5.51721	-4.13305	-3.37308		210.6	-508356	-442362	-453200	-422641	-358853	-312252	-231244	-188093	-140904	-114995
	210.7	-14.9817	-13.0537	-13.3057	-12.4401	-10.634	-9.20768	-6.77496	-5.54105	-4.08156	-3.30914		210.7	-510754	-445027	-453618	-424106	-362534	-313908	-230972	-188905	-139148	-112815
	210.8	-15.0489	-13.1326	-13.3178	-12.4814	-10.7454	-9.25861	-6.77488	-5.56126	-4.02766	-3.24963		210.8	-513046	-447718	-454030	-425517	-366332	-315644	-230969	-189594	-137311	-110786
	210.9	-15.1136	-13.2171	-13.3326	-12.5205	-10.858	-9.30821	-6.78035	-5.58259	-3.97131	-3.19312		210.9	-515252	-450597	-454533	-426847	-370171	-317335	-231155	-190321	-135390	-108860
	211	-15.1772	-13.306	-13.3479	-12.5618	-10.9715	-9.35539	-6.78646	-5.60203	-3.91358	-3.14171		211	-517422	-453626	-455056	-428256	-374041	-318944	-231364	-190984	-133422	-107107
	211.1	-15.2354	-13.3996	-13.3658	-12.6035	-11.0837	-9.4004	-6.79534	-5.62157	-3.85521	-3.09213		211.1	-519405	-456817	-455665	-429677	-377865	-320478	-231666	-191650	-131432	-105417
	211.2	-15.2874	-13.4962	-13.3865	-12.6444	-11.1946	-9.44411	-6.80445	-5.64109	-3.79649	-3.04599		211.2	-521177	-460113	-456373	-431074	-381647	-321968	-231977	-192316	-129430	-103844
	211.3	-15.3349	-13.5951	-13.4083	-12.6839	-11.3029	-9.48838	-6.81303	-5.65723	-3.7359	-3.00657		211.3	-522796	-463483	-457114	-432420	-385336	-323477	-232270	-192866	-127364	-102500
	211.4	-15.3769	-13.694	-13.4338	-12.722	-11.4109	-9.53443	-6.82184	-5.67045	-3.67232	-2.97449		211.4	-524227	-466856	-457985	-433717	-389019	-325047	-232570	-193317	-125197	-101406
	211.5	-15.41	-13.7902	-13.4624	-12.7576	-11.5177	-9.57645	-6.83296	-5.68291	-3.60742	-2.94867		211.5	-525356	-470135	-458958	-434931	-392662	-326480	-232949	-193742	-122984	-100526
	211.6	-15.437	-13.8831	-13.4923	-12.7912	-11.6177	-9.61469	-6.84409	-5.6949	-3.54438	-2.92588		211.6	-526277	-473300	-459980	-436077	-396068	-327783	-233329	-194150	-120835	-99749
	211.7	-15.4587	-13.9731	-13.5212	-12.8252	-11.7104	-9.6491	-6.85615	-5.7067	-3.48466	-2.90305		211.7	-527016	-476369	-460966	-437235	-399232	-328957	-233740	-194552	-118799	-98970.5
	211.8	-15.4732	-14.0586	-13.5489	-12.8583	-11.7986	-9.68003	-6.86976	-5.71572	-3.4307	-2.88013		211.8	-527512	-479286	-461908	-438366	-402238	-330011	-234203	-194860	-116959	-98189.4
	211.9	-15.4814	-14.1393	-13.5746	-12.8934	-11.8823	-9.70895	-6.88326	-5.71687	-3.38019	-2.85711		211.9	-527790	-482037	-462786	-439560	-405092	-330997	-234664	-194899	-115237	-97404.5
	212	-15.4849	-14.2152	-13.5973	-12.9259	-11.9617	-9.7358	-6.89661	-5.71078	-3.33175	-2.83481		212	-527911	-484623	-463558	-440669	-407797	-331912	-235119	-194691	-113586	-96644.3
	212.1	-15.4844	-14.2845	-13.6167	-12.9572	-12.0369	-9.75869	-6.90542	-5.69891	-3.28718	-2.81333		212.1	-527894	-486985	-464221	-441736	-410361	-332693	-235419	-194287	-112066	-95911.9
	212.2	-15.4819	-14.3464	-13.6342	-12.9859	-12.1051	-9.77782	-6.91079	-5.68271	-3.24663	-2.79698		212.2	-527808	-489097	-464817	-442714	-412686	-333345	-235602	-193735	-110684	-95354.5
	212.3	-15.4775	-14.3977	-13.6503	-13.0118	-12.1665	-9.79057	-6.91375	-5.66314	-3.21146	-2.78403		212.3	-527659	-490846	-465364	-443596	-414781	-333780	-235703	-193067	-109485	-94913.2
	212.4	-15.4699	-14.4417	-13.6684	-13.0335	-12.2186	-9.79916	-6.91897	-5.64025	-3.18239	-2.77477		212.4	-527399	-492347	-465982	-444336	-416557	-334072	-235881	-192287	-108494	-94597.3
	212.5	-15.4592	-14.4795	-13.6885	-13.05	-12.2632	-9.80299	-6.92886	-5.61605	-3.15891	-2.76723		212.5	-527035	-493634	-466668	-444899	-418076	-334203	-236218	-191462	-107694	-94340.4
	212.6	-15.4468	-14.5114	-13.7094	-13.0621	-12.2999	-9.79866	-6.94354	-5.59174	-3.13854	-2.7627		212.6	-526613	-494722	-467379	-445312	-419328	-334055	-236719	-190633	-106999	-94186
	212.7	-15.4312	-14.5433	-13.7295	-13.0723	-12.3299	-9.78619	-6.96242	-5.56701	-3.12297	-2.76335		212.7	-526079	-495809	-468066	-445659	-420351	-333630	-237362	-189790	-106468	-94208.1
	212.8	-15.4125	-14.5726	-13.7485	-13.0798	-12.3522	-9.76863	-6.98474	-5.5442	-3.11731	-2.76704		212.8	-525443	-496810	-468715	-445914	-421112	-333032	-238123	-189013	-106275	-94333.9
	212.9	-15.3914	-14.5999	-13.7681	-13.0865	-12.3688	-9.75023	-7.00966	-5.52432	-3.12233	-2.77339		212.9	-524722	-497740	-469383	-446143	-421677	-332404	-238973	-188335	-106446	-94550.1
	213	-15.3664	-14.6255	-13.789	-13.0923	-12.3796	-9.72933	-7.03202	-5.50125	-3.13915	-2.78198		213	-523870	-498610	-470093	-446343	-422046	-331692	-239735	-187548	-107020	-94843.3
	213.1	-15.3347	-14.6489	-13.8086	-13.0933	-12.383	-9.70424	-7.05027	-5.4749	-3.16736	-2.79148		213.1	-522788	-499410	-470762	-446375	-422161	-330837	-240357	-186650	-107982	-95167.1
	213.2	-15.2981	-14.6697	-13.8278	-13.0913	-12.3775	-9.67933	-7.06786	-5.4477	-3.20441	-2.80138		213.2	-521542	-500118	-471416	-446310	-421975	-329987	-240957	-185723	-109245	-95504.4
	213.3	-15.2567	-14.6883	-13.8483	-13.0872	-12.3621	-9.65409	-7.08489	-5.42209	-3.24843	-2.81275		213.3	-520132	-500753	-472114	-446167	-421447	-329127	-241538	-184850	-110745	-95892.2
	213.4	-15.2102	-14.7042	-13.871	-13.0812	-12.3372	-9.62998	-7.10328	-5.39773	-3.2962	-2.82704		213.4	-518546	-501295	-472890	-445962	-420601	-328305	-242165	-184019	-112374	-96379.4
	213.5	-15.159	-14.7158	-13.8949	-13.0735	-12.301	-9.60683	-7.12259	-5.37535	-3.34786	-2.84258		213.5	-516800	-501691	-473704	-445701	-419366	-327515	-242823	-183256	-114135	-96909
	213.6	-15.1009	-14.7248	-13.9175	-13.0648	-12.2541	-9.58439	-7.14216	-5.35175	-3.40338	-2.86005		213.6	-514819	-501997	-474474	-445406	-417766	-326750	-243490	-182452	-116028	-97504.7
	213.7	-15.0368	-14.733	-13.9393	-13.0532	-12.199	-9.56243	-7.16106	-5.3275	-3.4661	-2.8753		213.7	-512635	-502277	-475217	-445010	-415886	-326002	-244134	-181625	-118166	-98024.6
	213.8	-14.9666	-14.7407	-13.9597	-13.0354	-12.1364	-9.54218	-7.17769	-5.29846	-3.53474	-2.888		213.8	-510240	-502540	-475914	-444401	-413755	-325312	-244701	-180635	-120506	-98457.6
	213.9	-14.8917	-14.7476	-13.9755	-13.0104	-12.0675	-9.52178	-7.19046	-5.26644	-3.60302	-2.89607		213.9	-507688	-502775	-476453	-443550	-411406	-324616	-245137	-179543	-122834	-98732.8
	214	-14.8136	-14.7514	-13.9889	-12.9787	-11.9939	-9.50061	-7.19964	-5.23045	-3.66814	-2.90106		214	-505026	-502902	-476910	-442470	-408894	-323894	-245450	-178316	-125054	-98902.8
	214.1	-14.7334	-14.7519	-13.9986	-12.941	-11.9147	-9.47805	-7.20335	-5.19167	-3.73224	-2.906		214.1	-502291	-502922	-477240	-441183	-406194	-323125	-245576	-176994	-127240	-99071.3
	214.2	-14.6517	-14.7485	-14.0016	-12.8971	-11.8297	-9.45435	-7.20249	-5.15069	-3.79376	-2.9117		214.2	-499506	-502804	-477342	-439689	-403298	-322317	-245547	-175597	-129337	-99265.5
	214.3	-14.5641	-14.7392	-13.9989	-12.8438	-11.7375	-9.428	-7.19861	-5.10879	-3.85559	-2.9169		214.3	-496518	-502487	-477250	-437870	-400153	-321419	-245415	-174169	-131445	-99442.7
	214.4	-14.47	-14.7217	-13.9896	-12.7831	-11.6373	-9.40118	-7.19146	-5.06849	-3.91548	-2.92103		214.4	-493311	-501892	-476932	-435802	-396737	-320505	-245171	-172795	-133486	-99583.5
	214.5	-14.3709	-14.6959	-13.9739	-12.7196	-11.5317	-9.3762	-7.18139	-5.02833	-3.97221	-2.92433		214.5	-489931	-501012	-476399	-433634	-393139	-319653	-244828	-171425	-135420	-99696.2
	214.6	-14.2684	-14.6608	-13.9518	-12.6545	-11.425	-9.34913	-7.16941	-4.98788	-4.02643	-2.9273		214.6	-486438	-499816	-475643	-431417	-389500	-318730	-244419	-170047	-137269	-99797.3
	214.7	-14.1624	-14.6149	-13.9226	-12.5883	-11.3186	-9.31814	-7.15523	-4.94828	-4.0757	-2.92876		214.7	-482823	-498250	-474648	-429159	-385875	-317673	-243936	-168697	-138948	-99847.1
	214.8	-14.0543	-14.5617	-13.8852	-12.5225	-11.2124	-9.28125	-7.13678	-4.90776	-4.12048	-2.92887		214.8	-479138	-496436	-473375	-426917	-382251	-316416	-243307	-167315	-140475	-99850.8
	214.9	-13.9452	-14.503	-13.84	-12.4553	-11.107	-9.24063	-7.11386	-4.86716	-4.16038	-2.93049		214.9	-475418	-494437	-471832	-424626	-378660	-315031	-242525	-165931	-141835	-99906.1
	215	-13.8343	-14.4379	-13.7873	-12.3852	-10.9998	-9.1968	-7.08546	-4.82376	-4.18906	-2.93424		215	-471638	-492217	-470037	-422236	-375006	-313537	-241557	-164451	-142813	-100034
	215.1	-13.7235	-14.3669	-13.7273	-12.3114	-10.886	-9.14794	-7.05335	-4.77932	-4.20631	-2.93915		215.1	-467860	-489796	-467991	-419719	-371124	-311871	-240463	-162936	-143401	-100201
	215.2	-13.6123	-14.2914	-13.6593	-12.2296	-10.7662	-9.09321	-7.01844	-4.73792	-4.21088	-2.94681		215.2	-464071	-487221	-465672	-416932	-367039	-310005	-239272	-161525	-143557	-100462
	215.3	-13.4993	-14.2081	-13.5854	-12.1395	-10.641	-9.03315	-6.979	-4.69785	-4.20499	-2.95872		215.3	-460219	-484381	-463154	-413860	-362773	-307958	-237928	-160159	-143356	-100869
	215.4	-13.3844	-14.1171	-13.5063	-12.0428	-10.5124	-8.97167	-6.93602	-4.65555	-4.18936	-2.97415		215.4	-456300	-481280	-460457	-410562	-358387	-305862	-236462	-158717	-142824	-101394
	215.5	-13.2679	-14.0213	-13.4192	-11.9411	-10.3842	-8.90787	-6.88995	-4.60948	-4.16546	-2.98711		215.5	-452327	-478012	-457488	-407094	-354017	-303687	-234892	-157146	-142009	-101836
	215.6	-13.1471	-13.9216	-13.3242	-11.8356	-10.2545	-8.8431	-6.84026	-4.55863	-4.13488	-2.99694		215.6	-448212	-474615	-454247	-403499	-349597	-301479	-233198	-155412	-140966	-102171
	215.7	-13.0256	-13.8178	-13.2185	-11.7272	-10.1258	-8.77668	-6.78335	-4.50421	-4.09637	-3.00294		215.7	-444069	-471077	-450644	-399804	-345209	-299214	-231258	-153557	-139653	-102376
	215.8	-12.9021	-13.707	-13.1035	-11.6159	-9.99789	-8.70712	-6.7172	-4.44792	-4.05021	-3.00518		215.8	-439858	-467298	-446725	-396009	-340848	-296843	-229002	-151638	-138080	-102452
	215.9	-12.7736	-13.5907	-12.9787	-11.5007	-9.87139	-8.63227	-6.63999	-4.38748	-3.99894	-3.00384		215.9	-435478	-463332	-442468	-392080	-336535	-294291	-226370	-149578	-136332	-102407
	216	-12.64	-13.4643	-12.8423	-11.3824	-9.74566	-8.55236	-6.55189	-4.32223	-3.94505	-2.99724		216	-430921	-459025	-437819	-388049	-332249	-291567	-223367	-147353	-134494	-102182
	216.1	-12.5005	-13.3273	-12.6977	-11.2589	-9.61891	-8.46965	-6.45641	-4.25389	-3.88644	-2.9864		216.1	-426168	-454355	-432889	-383838	-327927	-288747	-220112	-145023	-132496	-101812
	216.2	-12.3578	-13.178	-12.5443	-11.1291	-9.48807	-8.38093	-6.35591	-4.18179	-3.82293	-2.97259		216.2	-421300	-449264	-427659	-379414	-323467	-285722	-216685	-142565	-130331	-101342
	216.3	-12.2122	-13.0167	-12.3817	-10.9923	-9.35308	-8.28407	-6.25325	-4.10756	-3.75093	-2.95624		216.3	-416339	-443763	-422116	-374748	-318865	-282420	-213185	-140035	-127876	-100784
	216.4	-12.0609	-12.8428	-12.2104	-10.8468	-9.21528	-8.17952	-6.14921	-4.03025	-3.66977	-2.93705		216.4	-411179	-437835	-416277	-369787	-314167	-278856	-209639	-137399	-125109	-100130
	216.5	-11.9031	-12.6564	-12.0289	-10.6939	-9.07617	-8.06737	-6.0415	-3.95183	-3.58076	-2.91421		216.5	-405799	-431480	-410087	-364576	-309424	-275032	-205967	-134726	-122075	-99351.1
	216.6	-11.738	-12.4578	-11.8366	-10.5323	-8.93598	-7.9503	-5.9277	-3.87188	-3.4878	-2.89199		216.6	-400170	-424712	-403533	-359068	-304645	-271041	-202087	-132000	-118906	-98593.7
	216.7	-11.5673	-12.2472	-11.6335	-10.3643	-8.79647	-7.82787	-5.80857	-3.79067	-3.39151	-2.87066		216.7	-394353	-417530	-396608	-353339	-299889	-266867	-198026	-129231	-115623	-97866.5
	216.8	-11.3927	-12.0255	-11.4232	-10.1867	-8.65932	-7.69958	-5.68446	-3.7078	-3.29203	-2.85294		216.8	-388398	-409972	-389441	-347286	-295213	-262494	-193794	-126406	-112232	-97262.1
	216.9	-11.2138	-11.7929	-11.2058	-10.0004	-8.52337	-7.56607	-5.55699	-3.62581	-3.18942	-2.8367		216.9	-382302	-402043	-382028	-340932	-290578	-257942	-189449	-123611	-108733	-96708.5
	217	-11.031	-11.5491	-10.9818	-9.80547	-8.3872	-7.42542	-5.42637	-3.54478	-3.08541	-2.82221		217	-376068	-393730	-374390	-334287	-285936	-253147	-184996	-120848	-105188	-96214.7
	217.1	-10.8444	-11.2942	-10.7502	-9.60527	-8.24783	-7.2757	-5.29276	-3.4653	-2.98037	-2.80957		217.1	-369708	-385043	-366496	-327462	-281185	-248043	-180441	-118139	-101607	-95783.6
	217.2	-10.6556	-11.0296	-10.5104	-9.39885	-8.10603	-7.11804	-5.15758	-3.38857	-2.87468	-2.79718		217.2	-363270	-376019	-358320	-320425	-276350	-242668	-175832	-115523	-98003.4	-95361.5
	217.3	-10.4647	-10.7561	-10.2616	-9.18615	-7.96245	-6.95269	-5.02391	-3.31375	-2.771	-2.78231		217.3	-356762	-366697	-349839	-313174	-271455	-237031	-171275	-112972	-94468.8	-94854.5
	217.4	-10.2684	-10.4783	-10.0059	-8.96649	-7.81649	-6.7802	-4.89153	-3.24174	-2.66585	-2.76872		217.4	-350071	-357226	-341121	-305685	-266479	-231150	-166762	-110517	-90884	-94391.1
	217.5	-10.064	-10.1952	-9.74407	-8.74166	-7.66685	-6.60315	-4.76188	-3.17191	-2.55911	-2.75602		217.5	-343100	-347574	-332194	-298020	-261378	-225114	-162342	-108137	-87245.1	-93958
	217.6	-9.85373	-9.9077	-9.47699	-8.51295	-7.51428	-6.42297	-4.63567	-3.1032	-2.45153	-2.74379		217.6	-335933	-337773	-323089	-290223	-256177	-218972	-158039	-105794	-83577.4	-93541.1
	217.7	-9.63926	-9.61546	-9.20547	-8.27984	-7.35809	-6.23955	-4.5121	-3.03496	-2.34605	-2.73142		217.7	-328621	-327810	-313832	-282276	-250852	-212719	-153826	-103468	-79981.4	-93119.5
	217.8	-9.42091	-9.31602	-8.92762	-8.03811	-7.19648	-6.05261	-4.38838	-2.96552	-2.24292	-2.72059		217.8	-321177	-317601	-304360	-274035	-245342	-206345	-149608	-101100	-76465.5	-92750.2
	217.9	-9.19699	-9.01065	-8.64543	-7.78707	-7.02778	-5.86032	-4.26405	-2.89401	-2.14274	-2.71179		217.9	-313543	-307191	-294740	-265476	-239591	-199790	-145370	-98662.5	-73050.2	-92450.1
	218	-8.96689	-8.70221	-8.35715	-7.52536	-6.84872	-5.66526	-4.13701	-2.81996	-2.04818	-2.70282		218	-305699	-296675	-284912	-256554	-233486	-193140	-141039	-96138.1	-69826.5	-92144.3
	218.1	-8.73069	-8.39159	-8.06445	-7.25371	-6.65899	-5.46676	-4.00976	-2.74542	-1.95938	-2.69545		218.1	-297646	-286086	-274933	-247293	-227018	-186372	-136700	-93596.6	-66798.9	-91893.3
	218.2	-8.48735	-8.08079	-7.76901	-6.97343	-6.46028	-5.26665	-3.88358	-2.67063	-1.87303	-2.68927		218.2	-289350	-275490	-264861	-237738	-220244	-179550	-132399	-91047	-63855.3	-91682.4
	218.3	-8.23439	-7.76944	-7.47014	-6.68687	-6.25566	-5.06449	-3.75824	-2.59606	-1.7917	-2.68265		218.3	-280726	-264875	-254672	-227968	-213268	-172658	-128126	-88504.6	-61082.6	-91456.8
	218.4	-7.97128	-7.45561	-7.16858	-6.39545	-6.04803	-4.86016	-3.63377	-2.52371	-1.71656	-2.67576		218.4	-271757	-254176	-244391	-218033	-206189	-165692	-123882	-86038	-58520.9	-91221.8
	218.5	-7.69848	-7.13747	-6.86485	-6.10235	-5.83852	-4.65347	-3.50827	-2.44923	-1.64615	-2.66558		218.5	-262456	-243330	-234036	-208041	-199047	-158646	-119604	-83498.9	-56120.4	-90874.8
	218.6	-7.41562	-6.81564	-6.55788	-5.80786	-5.62626	-4.44369	-3.38433	-2.37282	-1.58202	-2.65149		218.6	-252813	-232358	-223571	-198001	-191810	-151494	-115379	-80894.2	-53934.1	-90394.6
	218.7	-7.12245	-6.49076	-6.2465	-5.5099	-5.40928	-4.23043	-3.26212	-2.29797	-1.52621	-2.63062		218.7	-242818	-221283	-212955	-187843	-184413	-144224	-111212	-78342.3	-52031.5	-89682.8
	218.8	-6.81634	-6.16269	-5.9305	-5.2097	-5.18614	-4.01134	-3.14412	-2.22397	-1.47617	-2.60458		218.8	-232382	-210098	-202182	-177609	-176806	-136754	-107189	-75819.5	-50325.5	-88795.3
	218.9	-6.49925	-5.83009	-5.61287	-4.90912	-4.95846	-3.78799	-3.02815	-2.15177	-1.42827	-2.57468		218.9	-221572	-198759	-191354	-167362	-169044	-129140	-103236	-73358.2	-48692.5	-87776
	219	-6.1705	-5.49161	-5.29451	-4.60532	-4.7263	-3.56096	-2.91185	-2.08032	-1.38491	-2.54145		219	-210364	-187220	-180500	-157004	-161129	-121400	-99270.6	-70922.1	-47214.3	-86643
	219.1	-5.83141	-5.14983	-4.97131	-4.29823	-4.48822	-3.33181	-2.79549	-2.01033	-1.34698	-2.50552		219.1	-198804	-175568	-169482	-146535	-153012	-113588	-95303.9	-68535.9	-45921.2	-85418
	219.2	-5.48207	-4.80373	-4.643	-3.98926	-4.24259	-3.10146	-2.68073	-1.943	-1.31208	-2.46769		219.2	-186895	-163769	-158289	-136002	-144638	-105735	-91391.3	-66240.6	-44731.3	-84128.4
	219.3	-5.1228	-4.4524	-4.31449	-3.67643	-3.98938	-2.87208	-2.56701	-1.87736	-1.27944	-2.42895		219.3	-174646	-151791	-147089	-125337	-136006	-97914.7	-87514.4	-64002.9	-43618.8	-82807.5
	219.4	-4.75502	-4.09914	-3.98721	-3.35998	-3.73264	-2.64235	-2.45321	-1.81203	-1.24732	-2.39012		219.4	-162108	-139748	-135932	-114548	-127253	-90082.9	-83634.6	-61775.6	-42523.6	-81483.8
	219.5	-4.38055	-3.74217	-3.66205	-3.04299	-3.47555	-2.41057	-2.33785	-1.74753	-1.21525	-2.34916		219.5	-149342	-127578	-124846	-103741	-118488	-82181	-79701.7	-59576.6	-41430.4	-80087.6
	219.6	-3.99923	-3.38361	-3.33727	-2.72435	-3.21797	-2.17877	-2.22022	-1.68153	-1.18543	-2.30692		219.6	-136342	-115354	-113774	-92878.3	-109707	-74278.4	-75691.6	-57326.6	-40413.7	-78647.3
	219.7	-3.61312	-3.0243	-3.0121	-2.40351	-2.95882	-1.95169	-2.10057	-1.61618	-1.1564	-2.26491		219.7	-123178	-103104	-102689	-81940.4	-100872	-66537	-71612.5	-55098.6	-39423.8	-77215.1
	219.8	-3.22549	-2.66613	-2.68401	-2.08081	-2.69692	-1.72821	-1.97938	-1.55146	-1.12954	-2.22278		219.8	-109963	-90893.5	-91503.1	-70938.9	-91943.2	-58918	-67480.9	-52892.2	-38508.2	-75778.8
	219.9	-2.83705	-2.30954	-2.35474	-1.75776	-2.42905	-1.50624	-1.85704	-1.48496	-1.10311	-2.17604		219.9	-96720.6	-78736.6	-80277.7	-59925.6	-82810.9	-51350.7	-63310	-50625.3	-37607	-74185.4
	220	-2.4477	-1.95256	-2.02557	-1.4336	-2.15452	-1.28335	-1.73554	-1.4163	-1.07416	-2.12396		220	-83446.9	-66566.6	-69055.8	-48874.1	-73451.6	-43751.9	-59167.9	-48284.5	-36620.1	-72410.1
	220.1	-2.05748	-1.59675	-1.69536	-1.10869	-1.87506	-1.05966	-1.6163	-1.3457	-1.04509	-2.0655		220.1	-70143.7	-54436.5	-57798	-37797.3	-63924.6	-36126	-55102.7	-45877.4	-35629.2	-70416.8
	220.2	-1.66559	-1.24021	-1.36284	-0.784332	-1.59348	-0.835737	-1.49741	-1.27244	-1.01527	-2.00295		220.2	-56783.4	-42281.2	-46462	-26739.4	-54324.7	-28491.9	-51049.6	-43379.8	-34612.7	-68284.4
	220.3	-1.27023	-0.883072	-1.02836	-0.463156	-1.30968	-0.613134	-1.3755	-1.19396	-0.984631	-1.93868		220.3	-43304.6	-30105.6	-35058.9	-15789.9	-44649.6	-20902.9	-46893.4	-40704.4	-33568	-66093.2
	220.4	-0.870731	-0.525357	-0.688736	-0.144841	-1.02434	-0.393243	-1.25218	-1.1127	-0.951732	-1.86975		220.4	-29684.9	-17910.5	-23480.4	-4937.9	-34921.8	-13406.4	-42689.4	-37934.2	-32446.4	-63743.5
	220.5	-0.466783	-0.167818	-0.344372	0.171022	-0.737087	-0.174972	-1.12882	-1.03025	-0.919088	-1.79708		220.5	-15913.5	-5721.24	-11740.3	5830.46	-25128.7	-5965.12	-38483.8	-35123.3	-31333.5	-61265.9
	220.6	-0.0560378	0.190031	0.00277896	0.486114	-0.444693	0.0439033	-1.00412	-0.948706	-0.885419	-1.72412		220.6	-1910.44	6478.52	94.7401	16572.6	-15160.4	1496.75	-34232.3	-32343.2	-30185.7	-58778.8
	220.7	0.360844	0.551314	0.352373	0.798777	-0.149742	0.262635	-0.87563	-0.868653	-0.851941	-1.64816		220.7	12301.9	18795.4	12013.1	27231.9	-5104.99	8953.73	-29851.9	-29614.1	-29044.3	-56189
	220.8	0.783363	0.916119	0.704246	1.1116	0.147382	0.483218	-0.743598	-0.788396	-0.822813	-1.56786		220.8	26706.4	31232.3	24009.1	37896.6	5024.54	16473.9	-25350.7	-26878	-28051.3	-53451.4
	220.9	1.21229	1.28536	1.0596	1.42451	0.447679	0.705302	-0.608839	-0.707822	-0.798177	-1.48717		220.9	41329.5	43820.5	36123.8	48564.2	15262.2	24045.1	-20756.5	-24131	-27211.4	-50700.4
	221	1.64656	1.65881	1.4184	1.7374	0.752968	0.930359	-0.471825	-0.627264	-0.776842	-1.40853		221	56134.4	56552	48355.9	59231.3	25670.1	31717.8	-16085.4	-21384.7	-26484.1	-48019.4
	221.1	2.08794	2.03509	1.77841	2.05014	1.0614	1.15777	-0.333935	-0.547994	-0.75727	-1.3308		221.1	71181.8	69380.2	60629.6	69893.2	36185.2	39470.7	-11384.5	-18682.2	-25816.8	-45369.6
	221.2	2.53447	2.41288	2.14076	2.36243	1.37259	1.38683	-0.194202	-0.468156	-0.73681	-1.25068		221.2	86405.1	82259.9	72982.7	80539.9	46794.4	47279.7	-6620.71	-15960.4	-25119.3	-42638
	221.3	2.98812	2.79287	2.50445	2.67406	1.68485	1.61524	-0.0495083	-0.387763	-0.712493	-1.17169		221.3	101871	95214.6	85381.5	91163.9	57439.9	55066.7	-1687.83	-13219.6	-24290.3	-39945.3
	221.4	3.44746	3.17576	2.86979	2.98475	1.99686	1.84118	0.0985328	-0.304975	-0.68302	-1.09368		221.4	117531	108268	97836.7	101756	68076.8	62769.5	3359.17	-10397.2	-23285.5	-37285.8
	221.5	3.9083	3.56298	3.23731	3.29442	2.30774	2.06526	0.24962	-0.221562	-0.651369	-1.01679		221.5	133242	121469	110366	112313	78675.2	70408.7	8510.02	-7553.5	-22206.4	-34664.4
	221.6	4.36759	3.95511	3.60588	3.60578	2.6191	2.28937	0.403529	-0.13635	-0.619063	-0.944505		221.6	148900	134838	122931	122928	89290.1	78049.2	13757.1	-4648.43	-21105.1	-32200
	221.7	4.8239	4.35076	3.97548	3.9204	2.92976	2.51458	0.559233	-0.0496566	-0.584419	-0.874401		221.7	164456	148326	135532	133654	99881.1	85727.1	19065.4	-1692.89	-19924	-29810
	221.8	5.27926	4.7491	4.34617	4.24026	3.24015	2.74144	0.715012	0.0378933	-0.548217	-0.807807		221.8	179980	161906	148169	144559	110463	93461.2	24376.1	1291.86	-18689.8	-27539.7
	221.9	5.73348	5.15123	4.72013	4.5652	3.552	2.97065	0.869271	0.127979	-0.511426	-0.740636		221.9	195465	175615	160918	155637	121095	101275	29635.1	4363.04	-17435.5	-25249.7
	222	6.18395	5.55544	5.0975	4.89256	3.86423	3.20197	1.02409	0.221156	-0.473129	-0.675157		222	210823	189396	173784	166797	131739	109161	34913.2	7539.65	-16129.9	-23017.4
	222.1	6.62806	5.96062	5.47476	5.22378	4.17699	3.43444	1.18207	0.315951	-0.43259	-0.6117		222.1	225964	203209	186645	178089	142402	117087	40299.1	10771.4	-14747.8	-20854
	222.2	7.06762	6.36779	5.85425	5.55935	4.48982	3.66655	1.3442	0.4123	-0.391195	-0.552842		222.2	240949	217090	199583	189529	153067	125000	45826.5	14056.1	-13336.6	-18847.5
	222.3	7.50474	6.77616	6.23624	5.8996	4.80212	3.90017	1.50774	0.51036	-0.347823	-0.500334		222.3	255851	231013	212606	201129	163714	132964	51401.8	17399.2	-11858	-17057.4
	222.4	7.94176	7.18548	6.6182	6.24322	5.11588	4.13623	1.67192	0.608819	-0.299605	-0.455668		222.4	270750	244967	225627	212843	174410	141012	56999	20755.8	-10214.1	-15534.6
	222.5	8.37556	7.59776	6.9979	6.58976	5.43133	4.37279	1.8356	0.708596	-0.25025	-0.415487		222.5	285539	259022	238572	224658	185165	149077	62579.2	24157.4	-8531.52	-14164.8
	222.6	8.80447	8.01223	7.3781	6.93912	5.74634	4.60951	1.9987	0.810032	-0.200041	-0.378478		222.6	300162	273152	251534	236568	195904	157147	68139.7	27615.6	-6819.8	-12903
	222.7	9.22888	8.42962	7.7619	7.29189	6.06486	4.84845	2.16253	0.910992	-0.148818	-0.345043		222.7	314630	287382	264618	248595	206763	165293	73724.8	31057.5	-5073.5	-11763.2
	222.8	9.65257	8.84595	8.15055	7.64845	6.38691	5.08855	2.32879	1.01345	-0.0968986	-0.314555		222.8	329075	301576	277868	260750	217742	173479	79393.1	34550.6	-3303.46	-10723.8
	222.9	10.0773	9.2601	8.53971	8.00773	6.71113	5.32967	2.49618	1.11511	-0.044577	-0.286273		222.9	343554	315695	291135	272999	228795	181699	85099.5	38016.3	-1519.72	-9759.61
	223	10.5011	9.67142	8.9297	8.36833	7.03546	5.57453	2.66546	1.21402	0.00693419	-0.259356		223	358004	329718	304431	285293	239852	190047	90870.6	41388.3	236.4	-8841.96
	223.1	10.9243	10.0795	9.31758	8.72699	7.35971	5.82502	2.83483	1.30954	0.057723	-0.234002		223.1	372429	343631	317655	297520	250907	198586	96644.9	44644.9	1967.89	-7977.6
	223.2	11.3481	10.4871	9.70202	9.08532	7.6812	6.07822	3.00415	1.4025	0.108892	-0.209045		223.2	386880	357526	330761	309736	261867	207218	102417	47813.8	3712.35	-7126.74
	223.3	11.7739	10.8954	10.0843	9.44257	8.00087	6.3326	3.17272	1.49362	0.159582	-0.185054		223.3	401394	371447	343794	321916	272765	215891	108164	50920.6	5440.47	-6308.87
	223.4	12.2002	11.3035	10.4641	9.79812	8.31852	6.58902	3.34019	1.58277	0.210282	-0.161356		223.4	415930	385360	356741	334037	283594	224632	113874	53959.6	7168.92	-5500.92
	223.5	12.6265	11.7098	10.8425	10.1516	8.63593	6.84558	3.50785	1.67137	0.260702	-0.13787		223.5	430463	399209	369641	346090	294416	233379	119589	56980.3	8887.83	-4700.25
	223.6	13.0518	12.1139	11.2203	10.5082	8.95274	7.10271	3.67373	1.75735	0.309386	-0.113092		223.6	444960	412986	382523	358244	305216	242145	125245	59911.6	10547.6	-3855.52
	223.7	13.4741	12.5145	11.5949	10.8665	9.26586	7.35851	3.83806	1.84206	0.355803	-0.0878243		223.7	459357	426644	395292	370461	315891	250866	130847	62799.6	12130	-2994.1
	223.8	13.8933	12.9121	11.9621	11.2246	9.57511	7.6133	4.00197	1.9286	0.401821	-0.0632437		223.8	473648	440199	407813	382669	326434	259552	136435	65749.6	13698.9	-2156.1
	223.9	14.3065	13.3075	12.3209	11.5817	9.87961	7.86495	4.16849	2.01758	0.447579	-0.0404695		223.9	487738	453680	420043	394844	336815	268132	142112	68783.2	15258.8	-1379.69
	224	14.7145	13.6987	12.6756	11.939	10.1803	8.11435	4.33603	2.1093	0.493052	-0.0211425		224	501646	467015	432137	407025	347066	276634	147824	71910.2	16809.1	-720.789
	224.1	15.1162	14.0854	13.0288	12.294	10.4777	8.35901	4.50291	2.20232	0.539625	-0.00598983		224.1	515342	480198	444178	419125	357206	284975	153513	75081.2	18396.9	-204.205
	224.2	15.5112	14.4678	13.3773	12.6471	10.7711	8.59994	4.67076	2.29523	0.587799	0.00707314		224.2	528805	493236	456060	431163	367207	293189	159235	78248.8	20039.2	241.137
	224.3	15.8987	14.8456	13.72	12.9989	11.0581	8.83639	4.84006	2.38748	0.638522	0.0198171		224.3	542017	506115	467740	443158	376994	301250	165007	81393.9	21768.5	675.604
	224.4	16.2772	15.2161	14.057	13.3472	11.3379	9.06646	5.0093	2.47918	0.690405	0.0320284		224.4	554923	518745	479232	455030	386532	309093	170777	84520	23537.3	1091.91
	224.5	16.6462	15.5798	14.39	13.6913	11.6119	9.28903	5.17652	2.56971	0.741688	0.0435609		224.5	567500	531145	490582	466763	395873	316681	176478	87606.4	25285.6	1485.08
	224.6	17.0051	15.9332	14.7197	14.0315	11.8814	9.50509	5.33901	2.65913	0.790267	0.0551994		224.6	579737	543193	501824	478360	405060	324047	182017	90655	26941.8	1881.85
	224.7	17.3535	16.2782	15.0454	14.3669	12.1467	9.71533	5.49638	2.74555	0.836234	0.0693381		224.7	591614	554955	512926	489797	414103	331214	187382	93601.1	28508.9	2363.87
	224.8	17.6921	16.6147	15.3669	14.6968	12.4086	9.92254	5.65032	2.82908	0.878943	0.0871269		224.8	603158	566428	523886	501042	423035	338279	192630	96448.8	29964.9	2970.32
	224.9	18.0234	16.9421	15.6808	15.0184	12.668	10.1278	5.80041	2.90902	0.92017	0.107628		224.9	614454	577588	534590	512005	431876	345276	197747	99174	31370.4	3669.25
	225	18.3485	17.2621	15.9875	15.3315	12.9229	10.3309	5.94755	2.98513	0.961669	0.12979		225	625538	588498	545044	522681	440565	352200	202764	101769	32785.2	4424.79
	225.1	18.6675	17.5731	16.2898	15.6361	13.1738	10.5293	6.09329	3.05899	1.00031	0.153313		225.1	636411	599101	555351	533064	449121	358964	207732	104287	34102.5	5226.75
	225.2	18.981	17.8738	16.5866	15.9313	13.4199	10.7208	6.23924	3.12783	1.03669	0.174691		225.2	647098	609351	565469	543129	457509	365492	212708	106634	35342.7	5955.56
	225.3	19.2891	18.1632	16.8745	16.2183	13.6596	10.9055	6.38588	3.19111	1.07075	0.193632		225.3	657603	619220	575285	552914	465683	371791	217707	108791	36503.9	6601.28
	225.4	19.5924	18.4433	17.1541	16.497	13.8936	11.0826	6.52772	3.24857	1.10167	0.21159		225.4	667943	628768	584817	562416	473661	377826	222543	110750	37558.2	7213.53
	225.5	19.8871	18.7123	17.423	16.7675	14.1206	11.253	6.66369	3.29968	1.12902	0.23041		225.5	677992	637940	593984	571636	481398	383638	227178	112493	38490.4	7855.13
	225.6	20.1729	18.9704	17.6807	17.0285	14.3402	11.4156	6.795	3.34381	1.15473	0.252306		225.6	687733	646737	602769	580534	488886	389181	231655	113997	39367	8601.59
	225.7	20.4478	19.2184	17.9279	17.2779	14.5506	11.5702	6.91968	3.3837	1.17854	0.279081		225.7	697106	655193	611198	589037	496059	394452	235905	115357	40178.6	9514.41
	225.8	20.7134	19.4543	18.1672	17.5171	14.7514	11.7181	7.03757	3.42155	1.20036	0.309363		225.8	706162	663236	619356	597193	502904	399492	239925	116647	40922.7	10546.8
	225.9	20.9705	19.6791	18.3977	17.7447	14.9445	11.8606	7.15079	3.45659	1.22276	0.339862		225.9	714925	670898	627213	604950	509486	404351	243784	117842	41686.4	11586.6
	226	21.2175	19.8904	18.6177	17.9598	15.1281	11.9961	7.25916	3.48988	1.24677	0.372689		226	723346	678101	634713	612286	515745	408972	247479	118977	42504.8	12705.7
	226.1	21.4516	20.0891	18.8266	18.1618	15.3023	12.1222	7.36023	3.51902	1.27268	0.408416		226.1	731328	684878	641835	619171	521685	413269	250925	119970	43388.3	13923.7
	226.2	21.6699	20.2769	19.025	18.3512	15.4674	12.2389	7.45337	3.54573	1.30144	0.445932		226.2	738770	691279	648599	625630	527315	417249	254100	120881	44368.5	15202.7
	226.3	21.8732	20.4537	19.2127	18.5289	15.6243	12.3461	7.53995	3.5708	1.33267	0.483888		226.3	745701	697306	654997	631687	532661	420904	257052	121735	45433.3	16496.7
	226.4	22.0621	20.6211	19.3895	18.6962	15.7717	12.4447	7.61749	3.59631	1.36591	0.522712		226.4	752140	703014	661027	637390	537690	424266	259695	122605	46566.6	17820.3
	226.5	22.2368	20.7784	19.5571	18.8531	15.9112	12.5361	7.68686	3.62206	1.39932	0.559802		226.5	758095	708378	666738	642738	542445	427381	262060	123483	47705.6	19084.7
	226.6	22.3948	20.923	19.7148	18.9997	16.0414	12.6203	7.74958	3.64656	1.43241	0.593632		226.6	763483	713306	672115	647737	546882	430251	264198	124318	48833.8	20238.1
	226.7	22.5395	21.0548	19.863	19.1364	16.1614	12.697	7.80708	3.66772	1.46359	0.625302		226.7	768417	717800	677170	652398	550973	432867	266159	125040	49896.6	21317.8
	226.8	22.672	21.1744	20.0005	19.2634	16.2711	12.7656	7.85953	3.68676	1.49444	0.655119		226.8	772933	721875	681856	656727	554714	435205	267947	125689	50948.4	22334.3
	226.9	22.7893	21.2808	20.1252	19.3776	16.3711	12.8259	7.90664	3.70546	1.52543	0.684927		226.9	776930	725503	686107	660620	558122	437261	269553	126327	52004.9	23350.5
	227	22.8904	21.3737	20.2367	19.4779	16.463	12.8771	7.94999	3.72212	1.55653	0.713784		227	780379	728672	689909	664041	561256	439006	271031	126894	53065.2	24334.3
	227.1	22.9766	21.454	20.3344	19.5666	16.5473	12.9202	7.98929	3.73536	1.58836	0.740221		227.1	783318	731409	693241	667063	564129	440475	272370	127346	54150.3	25235.6
	227.2	23.0484	21.5226	20.4233	19.6432	16.6234	12.9546	8.02281	3.7434	1.6212	0.764726		227.2	785764	733747	696271	669676	566723	441646	273513	127620	55269.9	26071
	227.3	23.1041	21.5781	20.501	19.7088	16.6908	12.981	8.049	3.74683	1.65575	0.789793		227.3	787663	735638	698920	671911	569022	442549	274406	127737	56447.8	26925.6
	227.4	23.142	21.6209	20.5642	19.7627	16.7501	12.9996	8.06726	3.74595	1.68938	0.816718		227.4	788957	737100	701072	673748	571044	443181	275029	127707	57594.3	27843.5
	227.5	23.1621	21.6518	20.6121	19.8049	16.7992	13.0103	8.07952	3.7427	1.72359	0.845948		227.5	789643	738153	702707	675188	572717	443547	275447	127596	58760.6	28840
	227.6	23.1661	21.6683	20.6481	19.8353	16.8376	13.0121	8.08533	3.73704	1.75881	0.876994		227.6	789779	738714	703935	676224	574027	443608	275645	127403	59961.4	29898.4
	227.7	23.1545	21.6698	20.672	19.8551	16.8673	13.0091	8.08738	3.72785	1.79534	0.908835		227.7	789382	738767	704748	676900	575039	443506	275715	127090	61206.5	30984
	227.8	23.1288	21.657	20.6811	19.8631	16.8858	13.0023	8.08595	3.71407	1.83301	0.940544		227.8	788505	738330	705060	677171	575671	443275	275666	126620	62490.8	32065
	227.9	23.0875	21.6337	20.6732	19.8573	16.8921	12.9903	8.08035	3.69402	1.87312	0.969294		227.9	787097	737537	704790	676974	575886	442864	275475	125936	63858.3	33045.1
	228	23.0303	21.5994	20.6506	19.8383	16.8861	12.9736	8.07109	3.66849	1.91398	0.995374		228	785146	736365	704020	676326	575679	442297	275159	125066	65251.5	33934.3
	228.1	22.9596	21.5534	20.6127	19.8054	16.868	12.9496	8.05726	3.64096	1.95665	1.01815		228.1	782736	734797	702728	675204	575062	441478	274688	124127	66706.2	34710.7
	228.2	22.8749	21.4983	20.559	19.7606	16.8378	12.9179	8.0387	3.61419	1.99989	1.03898		228.2	779848	732919	700898	673677	574034	440396	274055	123215	68180.2	35420.8
	228.3	22.7748	21.4321	20.4933	19.703	16.7965	12.8783	8.01342	3.58819	2.04269	1.05615		228.3	776438	730661	698655	671715	572626	439047	273193	122329	69639.3	36006.1
	228.4	22.659	21.3544	20.4133	19.6321	16.7436	12.832	7.98207	3.56111	2.08629	1.06988		228.4	772489	728013	695930	669298	570822	437467	272124	121405	71125.7	36474.3
	228.5	22.5263	21.2653	20.3203	19.5484	16.6792	12.7783	7.94436	3.53347	2.12991	1.07988		228.5	767966	724977	692757	666443	568627	435639	270839	120463	72612.7	36815.4
	228.6	22.3771	21.166	20.2144	19.4525	16.603	12.7179	7.89998	3.50632	2.17359	1.08844		228.6	762879	721590	689147	663175	566028	433579	269326	119537	74102.1	37107
	228.7	22.2115	21.0547	20.0966	19.3413	16.5158	12.6509	7.85045	3.4815	2.21736	1.09319		228.7	757233	717796	685133	659384	563055	431295	267637	118691	75594.3	37269.1
	228.8	22.0329	20.9327	19.9682	19.2155	16.4204	12.5778	7.79751	3.45935	2.2622	1.09379		228.8	751146	713637	680754	655094	559805	428801	265832	117936	77122.8	37289.5
	228.9	21.8408	20.8004	19.8312	19.0767	16.3191	12.4998	7.74078	3.44028	2.30712	1.08913		228.9	744596	709126	676083	650362	556348	426142	263898	117286	78654.3	37130.5
	229	21.6353	20.6566	19.6864	18.9261	16.2134	12.416	7.68155	3.4218	2.34877	1.07936		229	737588	704225	671149	645228	552748	423286	261879	116656	80074.1	36797.4
	229.1	21.4163	20.5021	19.5336	18.7644	16.102	12.3255	7.6209	3.4024	2.38569	1.06668		229.1	730123	698956	665938	639717	548950	420200	259811	115994	81332.9	36365.2
	229.2	21.1834	20.3361	19.371	18.5933	15.9838	12.2287	7.55779	3.38281	2.41651	1.05135		229.2	722183	693296	660396	633883	544918	416899	257660	115327	82383.5	35842.4
	229.3	20.9382	20.1585	19.1982	18.4147	15.8586	12.1255	7.48932	3.36295	2.44072	1.03322		229.3	713824	687244	654504	627792	540652	413381	255326	114649	83209.1	35224.4
	229.4	20.682	19.9699	19.0155	18.2275	15.7264	12.0164	7.41614	3.34382	2.45676	1.01166		229.4	705088	680813	648275	621411	536144	409661	252831	113997	83755.7	34489.6
	229.5	20.4167	19.7716	18.825	18.0329	15.5862	11.902	7.33967	3.32622	2.46509	0.987187		229.5	696046	674051	641780	614776	531363	405761	250224	113397	84039.6	33655.1
	229.6	20.1418	19.5643	18.6266	17.8299	15.4391	11.7831	7.26004	3.3077	2.46634	0.961692		229.6	686672	666986	635018	607857	526348	401709	247509	112766	84082.3	32785.9
	229.7	19.8578	19.3499	18.4205	17.6183	15.2851	11.6591	7.1784	3.28729	2.46128	0.934376		229.7	676990	659677	627992	600642	521098	397481	244726	112070	83909.7	31854.7
	229.8	19.5643	19.128	18.2076	17.3982	15.1244	11.5315	7.09747	3.2644	2.45057	0.904161		229.8	666985	652111	620734	593138	515622	393133	241967	111290	83544.6	30824.6
	229.9	19.2634	18.8994	17.9875	17.1696	14.9563	11.401	7.01457	3.23957	2.43698	0.872662		229.9	656727	644317	613229	585344	509890	388681	239140	110443	83081.6	29750.8
	230	18.9559	18.664	17.7608	16.9338	14.78	11.2652	6.92919	3.21434	2.4212	0.841065		230	646245	636292	605500	577308	503878	384054	236230	109583	82543.3	28673.5
	230.1	18.6399	18.4199	17.5275	16.6913	14.5966	11.1243	6.83989	3.1885	2.4016	0.80822		230.1	635470	627972	597547	569037	497625	379249	233185	108702	81875.2	27553.8
	230.2	18.3171	18.1673	17.2858	16.4417	14.405	10.978	6.74694	3.1601	2.37946	0.773751		230.2	624464	619357	589307	560529	491093	374260	230016	107734	81120.6	26378.7
	230.3	17.9881	17.9084	17.0382	16.186	14.207	10.8309	6.6493	3.12991	2.35405	0.739111		230.3	613248	610532	580865	551812	484346	369246	226687	106705	80254.1	25197.7
	230.4	17.6522	17.6415	16.7863	15.9244	14.0028	10.6822	6.54628	3.09797	2.32553	0.706235		230.4	601797	601433	572277	542892	477384	364177	223175	105616	79281.8	24076.9
	230.5	17.3093	17.366	16.5305	15.6577	13.7923	10.5328	6.43893	3.06542	2.29378	0.677361		230.5	590106	592039	563556	533800	470207	359084	219516	104506	78199.4	23092.6
	230.6	16.9629	17.084	16.2708	15.3841	13.576	10.3818	6.32713	3.03197	2.25901	0.651285		230.6	578300	582427	554705	524475	462833	353937	215704	103366	77014.1	22203.6
	230.7	16.6144	16.7952	16.0089	15.1039	13.3561	10.2313	6.21061	2.99805	2.22338	0.627065		230.7	566419	572581	545776	514921	455334	348804	211732	102209	75799.4	21377.9
	230.8	16.2654	16.5	15.7461	14.8171	13.1351	10.081	6.09104	2.96333	2.18481	0.603269		230.8	554519	562519	536815	505142	447800	343680	207656	101026	74484.4	20566.6
	230.9	15.9145	16.1994	15.4798	14.524	12.9142	9.931	5.9685	2.92648	2.14228	0.579151		230.9	542557	552270	527738	495151	440271	338567	203478	99769.6	73034.6	19744.4
	231	15.5626	15.8934	15.2091	14.2249	12.6922	9.77839	5.84045	2.88792	2.09613	0.555096		231	530561	541837	518509	484954	432703	333365	199112	98454.8	71461.1	18924.3
	231.1	15.212	15.5833	14.9346	13.9211	12.4692	9.62271	5.70601	2.84769	2.04673	0.531968		231.1	518606	531267	509151	474597	425100	328057	194529	97083.3	69776.9	18135.8
	231.2	14.8635	15.2699	14.6584	13.616	12.2449	9.46506	5.56707	2.8095	1.99398	0.51008		231.2	506726	520581	499733	464195	417454	322683	189792	95781.2	67978.6	17389.6
	231.3	14.5179	14.9529	14.3805	13.3098	12.0212	9.30507	5.42631	2.77344	1.93759	0.487733		231.3	494943	509774	490260	453758	409827	317228	184993	94551.8	66056.2	16627.8
	231.4	14.1751	14.6322	14.1014	13.0036	11.7994	9.14329	5.28329	2.73942	1.87669	0.463364		231.4	483256	498839	480746	443317	402263	311713	180118	93392.1	63980	15797
	231.5	13.8332	14.3071	13.823	12.6979	11.5779	8.97901	5.13902	2.70522	1.8124	0.438465		231.5	471599	487758	471253	432897	394713	306112	175199	92226.2	61788.3	14948.1
	231.6	13.4938	13.9789	13.544	12.3929	11.3551	8.81202	4.9959	2.66905	1.74498	0.416202		231.6	460031	476568	461743	422497	387118	300419	170320	90993.1	59489.9	14189.2
	231.7	13.1586	13.6493	13.2645	12.0886	11.1327	8.64225	4.85289	2.63229	1.67416	0.397034		231.7	448602	465333	452212	412124	379536	294631	165444	89740.1	57075.3	13535.6
	231.8	12.8252	13.3179	12.9846	11.7851	10.911	8.46889	4.71073	2.59529	1.60082	0.380835		231.8	437238	454034	442671	401776	371978	288721	160598	88478.4	54575.2	12983.4
	231.9	12.4937	12.9851	12.7042	11.4829	10.6924	8.29292	4.56942	2.55708	1.52519	0.366619		231.9	425936	442686	433110	391474	364523	282722	155780	87175.7	51996.6	12498.7
	232	12.1663	12.653	12.4236	11.1847	10.4764	8.11584	4.42914	2.51616	1.44849	0.353917		232	414772	431365	423545	381307	357162	276685	150998	85780.8	49382	12065.7
	232.1	11.8424	12.3231	12.142	10.8915	10.2598	7.93847	4.28987	2.47085	1.37095	0.342249		232.1	403732	420119	413943	371311	349776	270638	146250	84236.2	46738.2	11667.9
	232.2	11.5221	11.9955	11.8615	10.6044	10.0405	7.76014	4.15212	2.42111	1.29145	0.333303		232.2	392812	408949	404382	361523	342301	264558	141554	82540.4	44028.1	11363
	232.3	11.2059	11.6711	11.5804	10.3232	9.81781	7.58167	4.01538	2.36821	1.21294	0.325817		232.3	382032	397891	394797	351937	334708	258474	136892	80736.9	41351.6	11107.7
	232.4	10.8947	11.3518	11.2974	10.0472	9.59294	7.4037	3.88019	2.31166	1.13587	0.318723		232.4	371420	387006	385150	342527	327042	252406	132283	78809	38723.9	10865.9
	232.5	10.5892	11.0371	11.0134	9.77573	9.36773	7.22609	3.7469	2.25142	1.06264	0.311278		232.5	361007	376277	375470	333274	319364	246351	127739	76755.5	36227.5	10612.1
	232.6	10.2904	10.7269	10.7298	9.50905	9.14314	7.04723	3.61549	2.18775	0.993875	0.304467		232.6	350819	365700	365799	324182	311708	240254	123259	74584.5	33883.1	10379.9
	232.7	9.99802	10.4242	10.4462	9.24761	8.9188	6.86947	3.48775	2.12068	0.930938	0.297096		232.7	340852	355382	356131	315269	304059	234194	118904	72298.1	31737.5	10128.6
	232.8	9.71234	10.1299	10.1606	8.99091	8.69572	6.6933	3.36332	2.05033	0.872659	0.288117		232.8	331112	345349	346396	306518	296454	228188	114662	69899.6	29750.7	9822.47
	232.9	9.43425	9.84348	9.8752	8.73973	8.47456	6.51752	3.24329	1.97859	0.817653	0.276909		232.9	321632	335584	336665	297955	288914	222195	110570	67454	27875.4	9440.38
	233	9.16372	9.56218	9.5911	8.49529	8.25545	6.34371	3.12659	1.90761	0.765919	0.264584		233	312409	325993	326979	289621	281444	216269	106591	65034.2	26111.7	9020.17
	233.1	8.89982	9.2868	9.30843	8.25684	8.03892	6.17092	3.01025	1.83834	0.718307	0.253471		233.1	303412	316605	317343	281492	274062	210379	102625	62672.6	24488.5	8641.31
	233.2	8.64217	9.01627	9.02813	8.02469	7.82686	6.00017	2.89372	1.77094	0.673123	0.243367		233.2	294629	307382	307787	273577	266833	204558	98652.5	60374.7	22948.1	8296.84
	233.3	8.38993	8.7507	8.75219	7.7978	7.62035	5.83145	2.77862	1.70438	0.631128	0.232936		233.3	286029	298328	298379	265842	259793	198805	94728.7	58105.6	21516.4	7941.23
	233.4	8.14474	8.49095	8.48057	7.57621	7.4208	5.6645	2.66699	1.63772	0.592799	0.222908		233.4	277670	289473	289119	258288	252989	193114	90922.9	55833.1	20209.7	7599.35
	233.5	7.90535	8.23878	8.21615	7.36164	7.2278	5.49996	2.55843	1.57251	0.555938	0.212825		233.5	269509	280876	280105	250973	246410	187504	87221.9	53609.8	18953	7255.62
	233.6	7.67331	7.99305	7.95867	7.15478	7.041	5.33731	2.45402	1.50879	0.520928	0.202309		233.6	261598	272499	271327	243920	240041	181959	83662.4	51437.7	17759.5	6897.12
	233.7	7.44923	7.75521	7.70654	6.95564	6.86096	5.17536	2.35396	1.44687	0.487168	0.189203		233.7	253959	264390	262731	237131	233904	176438	80251.2	49326.5	16608.5	6450.3
	233.8	7.23319	7.52683	7.45884	6.76424	6.68847	5.0147	2.25919	1.38666	0.453367	0.174328		233.8	246593	256604	254286	230606	228023	170961	77020.1	47273.9	15456.1	5943.18
	233.9	7.02386	7.30651	7.21552	6.58149	6.52335	4.85532	2.16906	1.32894	0.420042	0.158334		233.9	239457	249093	245991	224376	222394	165527	73947.5	45306.1	14320	5397.9
	234	6.821	7.09407	6.97634	6.40653	6.36328	4.69587	2.08394	1.27245	0.384725	0.141587		234	232541	241851	237837	218411	216937	160091	71045.6	43380.2	13116	4826.97
	234.1	6.62477	6.88978	6.74117	6.23921	6.2055	4.53703	2.00292	1.21716	0.348848	0.123261		234.1	225851	234886	229820	212707	211558	154676	68283.6	41495.4	11892.9	4202.22
	234.2	6.43486	6.69398	6.51062	6.0791	6.04947	4.38038	1.92566	1.16473	0.313642	0.102773		234.2	219377	228211	221960	207248	206238	149336	65649.5	39707.8	10692.7	3503.75
	234.3	6.25077	6.50771	6.28642	5.9259	5.89588	4.22593	1.85312	1.11572	0.27965	0.0811603		234.3	213101	221861	214316	202025	201002	144070	63176.6	38037	9533.83	2766.91
	234.4	6.07086	6.33105	6.07074	5.77766	5.74497	4.07341	1.78656	1.06946	0.246234	0.0584977		234.4	206968	215838	206963	196972	195857	138871	60907.4	36459.9	8394.58	1994.3
	234.5	5.89521	6.16243	5.86313	5.63584	5.59759	3.92234	1.72508	1.02476	0.213666	0.035407		234.5	200979	210089	199885	192137	190833	133720	58811.5	34936	7284.31	1207.09
	234.6	5.72286	6.00071	5.6618	5.49914	5.45413	3.7742	1.66772	0.979887	0.182623	0.0133918		234.6	195104	204576	193022	187476	185942	128670	56855.7	33406.3	6225.98	456.551
	234.7	5.55483	5.84667	5.46736	5.3681	5.31138	3.63001	1.61291	0.935448	0.15549	-0.00653992		234.7	189375	199324	186393	183009	181075	123754	54987.4	31891.2	5300.97	-222.959
	234.8	5.39099	5.70036	5.27951	5.24211	5.17015	3.491	1.56175	0.890908	0.132314	-0.0248134		234.8	183789	194337	179989	178714	176260	119015	53243	30372.8	4510.85	-845.938
	234.9	5.2324	5.56005	5.09825	5.12048	5.03284	3.3554	1.51302	0.847143	0.113778	-0.0416065		234.9	178383	189553	173809	174567	171579	114392	51581.8	28880.8	3878.93	-1418.45
	235	5.07786	5.42347	4.92342	5.00332	4.90024	3.22297	1.46808	0.803782	0.0987206	-0.0572064		235	173114	184897	167849	170573	167059	109877	50049.6	27402.5	3365.58	-1950.28
	235.1	4.92794	5.29059	4.75436	4.89011	4.77174	3.09638	1.42701	0.760181	0.0872338	-0.0714821		235.1	168003	180367	162085	166714	162678	105562	48649.6	25916.1	2973.97	-2436.97
	235.2	4.78383	5.16107	4.59239	4.78046	4.64603	2.97596	1.38814	0.716496	0.0793746	-0.0837454		235.2	163090	175951	156564	162975	158392	101456	47324.4	24426.8	2706.03	-2855.05
	235.3	4.64383	5.0339	4.43841	4.67359	4.52355	2.8627	1.35095	0.67324	0.0741243	-0.0934275		235.3	158317	171615	151314	159332	154217	97594.9	46056.6	22952.1	2527.04	-3185.13
	235.4	4.50738	4.90729	4.29089	4.56898	4.40377	2.75434	1.31504	0.632678	0.0716933	-0.0998348		235.4	153665	167299	146285	155766	150133	93900.7	44832.2	21569.2	2444.16	-3403.56
	235.5	4.37562	4.78196	4.14939	4.46543	4.28891	2.65058	1.2792	0.594892	0.07236	-0.103644		235.5	149173	163026	141461	152235	146217	90363.5	43610.3	20281	2466.89	-3533.42
	235.6	4.24782	4.65754	4.01341	4.36155	4.17959	2.5511	1.24269	0.559751	0.0754252	-0.10516		235.6	144817	158785	136825	148694	142490	86971.8	42365.7	19083	2571.39	-3585.1
	235.7	4.12408	4.53386	3.88473	4.258	4.076	2.45538	1.20527	0.528216	0.0809889	-0.105731		235.7	140598	154568	132438	145164	138959	83708.7	41089.9	18007.9	2761.07	-3604.56
	235.8	4.00531	4.41208	3.76303	4.15524	3.977	2.36268	1.16752	0.501209	0.0878934	-0.104987		235.8	136549	150416	128289	141660	135584	80548.2	39802.9	17087.2	2996.46	-3579.21
	235.9	3.89114	4.29323	3.6479	4.05277	3.88043	2.27405	1.13106	0.476671	0.0945621	-0.103512		235.9	132657	146365	124364	138167	132291	77526.6	38560	16250.6	3223.81	-3528.92
	236	3.78088	4.17631	3.53858	3.95008	3.78581	2.18991	1.09618	0.453946	0.0999873	-0.101027		236	128898	142379	120637	134666	129066	74658.2	37370.8	15475.9	3408.76	-3444.2
	236.1	3.67382	4.05999	3.43662	3.84734	3.69278	2.10977	1.06275	0.433655	0.104925	-0.0966279		236.1	125248	138413	117161	131163	125894	71926.2	36231.2	14784.2	3577.08	-3294.23
	236.2	3.56844	3.94348	3.34164	3.74497	3.60085	2.03383	1.03085	0.416025	0.110433	-0.0899774		236.2	121655	134441	113923	127673	122760	69337.3	35143.6	14183.1	3764.88	-3067.51
	236.3	3.46426	3.82675	3.25135	3.64187	3.5103	1.96191	1.00011	0.400289	0.117039	-0.0813023		236.3	118103	130461	110845	124158	119673	66885.3	34095.6	13646.6	3990.08	-2771.75
	236.4	3.36231	3.70992	3.16515	3.53903	3.42197	1.89274	0.970904	0.38564	0.124046	-0.071124		236.4	114628	126478	107906	120652	116662	64527.1	33100	13147.2	4228.96	-2424.76
	236.5	3.26273	3.59522	3.08327	3.436	3.33443	1.82704	0.943701	0.370712	0.132516	-0.0589033		236.5	111233	122568	105115	117140	113677	62287.3	32172.6	12638.3	4517.72	-2008.13
	236.6	3.16525	3.48303	3.0045	3.33287	3.24704	1.76444	0.919402	0.355566	0.141483	-0.0449944		236.6	107910	118743	102429	113624	110698	60153.2	31344.2	12121.9	4823.43	-1533.95
	236.7	3.06756	3.37295	2.92878	3.22949	3.15843	1.70521	0.896744	0.340908	0.150407	-0.0311259		236.7	104579	114990	99847.9	110100	107677	58134	30571.7	11622.2	5127.68	-1061.14
	236.8	2.97094	3.26467	2.85522	3.12689	3.06959	1.64913	0.875942	0.326702	0.159914	-0.0175768		236.8	101285	111299	97340.2	106602	104648	56222	29862.6	11137.9	5451.79	-599.227
	236.9	2.87535	3.15891	2.78273	3.02471	2.98122	1.59512	0.855779	0.312411	0.171911	-0.00397414		236.9	98026.4	107693	94868.8	103118	101636	54380.6	29175.2	10650.7	5860.79	-135.486
	237	2.78119	3.05563	2.71218	2.92288	2.89219	1.544	0.835988	0.297419	0.186654	0.00931842		237	94816.2	104172	92463.6	99646.6	98600.3	52638.1	28500.5	10139.6	6363.41	317.683
	237.1	2.68883	2.95338	2.6437	2.82174	2.80152	1.49618	0.816767	0.280987	0.204006	0.0216353		237.1	91667.6	100687	90128.7	96198.5	95509.3	51007.7	27845.2	9579.4	6954.95	737.591
	237.2	2.59857	2.85235	2.57809	2.72047	2.70949	1.45117	0.799423	0.264291	0.223975	0.0322138		237.2	88590.3	97242	87892	92746.2	92371.8	49473.1	27253.9	9010.18	7635.75	1098.23
	237.3	2.51004	2.75342	2.51342	2.61979	2.61756	1.4086	0.784314	0.24792	0.247422	0.0403611		237.3	85572.1	93869.6	85687.5	89313.9	89237.6	48021.9	26738.8	8452.06	8435.1	1375.99
	237.4	2.42356	2.65602	2.45005	2.52143	2.52743	1.36839	0.771534	0.233105	0.273293	0.048081		237.4	82624	90548.8	83527.1	85960.4	86165	46651.1	26303.1	7947.02	9317.09	1639.17
	237.5	2.33879	2.55953	2.38961	2.42601	2.43953	1.32921	0.75984	0.219782	0.300663	0.0560174		237.5	79734.1	87259.3	81466.3	82707.5	83168.4	45315.3	25904.4	7492.78	10250.2	1909.74
	237.6	2.25677	2.46459	2.33123	2.33444	2.3524	1.29165	0.749222	0.206062	0.32966	0.0649876		237.6	76937.5	84022.6	79476	79585.6	80197.8	44034.7	25542.5	7025.06	11238.8	2215.55
	237.7	2.17764	2.37103	2.27439	2.24663	2.26664	1.2563	0.739883	0.192424	0.359847	0.074455		237.7	74240.1	80833.1	77538.3	76592.1	77274.1	42829.7	25224.1	6560.11	12267.9	2538.32
	237.8	2.10166	2.27848	2.21927	2.16111	2.18326	1.22438	0.731702	0.178708	0.390418	0.0839845		237.8	71649.5	77677.8	75659.3	73676.3	74431.7	41741.6	24945.1	6092.5	13310.1	2863.19
	237.9	2.02848	2.18735	2.16703	2.07784	2.10213	1.19507	0.72384	0.165946	0.420636	0.0946419		237.9	69154.7	74570.9	73878.4	70837.5	71665.5	40742.1	24677.1	5657.43	14340.3	3226.53
	238	1.95715	2.0974	2.11688	1.9973	2.02408	1.16733	0.714931	0.154004	0.449747	0.106119		238	66723.1	71504.6	72168.5	68091.7	69005	39796.5	24373.4	5250.3	15332.8	3617.81
	238.1	1.88767	2.00882	2.06869	1.91962	1.94998	1.13971	0.705428	0.142567	0.476346	0.118838		238.1	64354.3	68484.5	70525.8	65443.5	66478.7	38854.9	24049.4	4860.38	16239.6	4051.41
	238.2	1.82066	1.92245	2.02159	1.84446	1.87908	1.11231	0.695757	0.131847	0.499373	0.130509		238.2	62069.7	65539.9	68919.8	62881.2	64061.5	37920.8	23719.7	4494.93	17024.6	4449.3
	238.3	1.75562	1.83908	1.97561	1.77197	1.80995	1.08522	0.685529	0.121205	0.519408	0.140893		238.3	59852.4	62697.9	67352.4	60410.1	61704.6	36997.3	23371	4132.12	17707.6	4803.31
	238.4	1.69279	1.75905	1.93117	1.70299	1.7421	1.05798	0.674124	0.110606	0.536378	0.14936		238.4	57710.5	59969.5	65837.2	58058.4	59391.6	36068.4	22982.2	3770.79	18286.2	5091.99
	238.5	1.63149	1.68242	1.88673	1.63681	1.67597	1.03139	0.662392	0.101409	0.549606	0.156655		238.5	55620.8	57357	64322.5	55802.1	57137	35162	22582.2	3457.22	18737.1	5340.67
	238.6	1.5736	1.60956	1.84108	1.57215	1.61176	1.00418	0.651648	0.0935028	0.559776	0.162193		238.6	53647.1	54873.2	62766.2	53597.7	54948	34234.5	22216	3187.69	19083.9	5529.47
	238.7	1.51972	1.54271	1.7947	1.5093	1.55013	0.976068	0.642324	0.0867526	0.567314	0.164917		238.7	51810.4	52594.1	61184.7	51455.1	52847	33276.1	21898.1	2957.56	19340.8	5622.34
	238.8	1.46872	1.48199	1.74999	1.44882	1.49123	0.947392	0.633156	0.0811256	0.572343	0.165265		238.8	50071.6	50523.9	59660.7	49393	50838.9	32298.5	21585.5	2765.73	19512.3	5634.19
	238.9	1.4216	1.4274	1.70664	1.3906	1.43418	0.918044	0.623969	0.0761586	0.575771	0.162887		238.9	48465.2	48662.9	58182.6	47408.4	48894.1	31297.9	21272.3	2596.4	19629.1	5553.12
	239	1.3771	1.37908	1.6628	1.33432	1.37855	0.889281	0.616137	0.0712288	0.575673	0.157849		239	46948.2	47015.6	56688.2	45489.7	46997.6	30317.3	21005.3	2428.33	19625.8	5381.37
	239.1	1.33436	1.33576	1.61771	1.28077	1.3237	0.861704	0.609128	0.0666447	0.572106	0.150534		239.1	45490.9	45538.6	55150.9	43664.1	45127.4	29377.2	20766.3	2272.05	19504.2	5131.98
	239.2	1.29306	1.29651	1.57349	1.2301	1.2709	0.834637	0.602397	0.0634881	0.567013	0.142747		239.2	44083	44200.6	53643.4	41936.5	43327.3	28454.4	20536.9	2164.43	19330.6	4866.53
	239.3	1.25402	1.26053	1.53087	1.18284	1.22145	0.807131	0.595228	0.0621716	0.561265	0.135423		239.3	42752	42973.8	52190.4	40325.3	41641.5	27516.7	20292.5	2119.55	19134.6	4616.82
	239.4	1.21843	1.22745	1.48949	1.13948	1.17513	0.779512	0.586641	0.0607647	0.554948	0.127104		239.4	41538.7	41846.1	50779.8	38847.2	40062.5	26575.1	19999.7	2071.59	18919.3	4333.22
	239.5	1.18659	1.19792	1.44888	1.10024	1.13281	0.751504	0.57744	0.0598246	0.5489	0.117993		239.5	40453	40839.3	49395.3	37509.3	38619.7	25620.2	19686.1	2039.54	18713.1	4022.6
	239.6	1.15765	1.17326	1.41007	1.06334	1.09343	0.72418	0.567297	0.0585968	0.543593	0.107815		239.6	39466.6	39998.8	48071.9	36251.3	37277.3	24688.7	19340.3	1997.68	18532.2	3675.63
	239.7	1.13185	1.15343	1.37343	1.02853	1.05571	0.69751	0.555543	0.0565187	0.538427	0.0962423		239.7	38586.8	39322.8	46822.9	35064.6	35991.2	23779.5	18939.5	1926.83	18356	3281.09
	239.8	1.10878	1.13683	1.33853	0.995758	1.02065	0.671413	0.543678	0.0540109	0.531467	0.0849985		239.8	37800.3	38756.6	45633.2	33947.3	34796.1	22889.8	18535.1	1841.34	18118.7	2897.77
	239.9	1.08818	1.12122	1.30614	0.965061	0.98869	0.645583	0.53114	0.0507325	0.523236	0.0735969		239.9	37098.3	38224.7	44529	32900.8	33706.4	22009.2	18107.6	1729.57	17838.1	2509.06
	240	1.0695	1.10689	1.27504	0.937085	0.958372	0.621523	0.517462	0.0463054	0.513905	0.0621118		240	36461.4	37735.9	43468.6	31947.1	32672.8	21188.9	17641.3	1578.64	17520	2117.51
	240.1	1.05282	1.09405	1.24562	0.910042	0.928396	0.599533	0.502012	0.0413669	0.503145	0.0510925		240.1	35892.7	37298.3	42465.5	31025.1	31650.8	20439.3	17114.6	1410.28	17153.2	1741.84
	240.2	1.03729	1.08113	1.21798	0.883513	0.898882	0.579847	0.484893	0.036667	0.490221	0.0411958		240.2	35363.3	36857.7	41523.2	30120.7	30644.6	19768.1	16530.9	1250.05	16712.6	1404.45
	240.3	1.02138	1.06806	1.19125	0.85754	0.870998	0.561402	0.46685	0.0324047	0.474222	0.0325099		240.3	34820.8	36412.4	40612.1	29235.2	29694	19139.3	15915.8	1104.74	16167.1	1108.33
	240.4	1.0046	1.05601	1.16525	0.832273	0.84384	0.543589	0.446427	0.0291405	0.455925	0.0253928		240.4	34248.7	36001.4	39725.8	28373.8	28768.2	18532	15219.6	993.455	15543.4	865.69
	240.5	0.988387	1.04553	1.14056	0.807636	0.818515	0.527086	0.422714	0.0260801	0.435479	0.0191634		240.5	33696	35644.2	38883.9	27533.9	27904.8	17969.4	14411.1	889.122	14846.3	653.319
	240.6	0.97343	1.03653	1.11785	0.784077	0.795233	0.51269	0.396249	0.0231018	0.412479	0.0147463		240.6	33186.1	35337.2	38109.7	26730.7	27111	17478.6	13508.9	787.584	14062.2	502.731
	240.7	0.95998	1.02873	1.09751	0.760135	0.773108	0.500166	0.367818	0.0195025	0.388797	0.011333		240.7	32727.6	35071.4	37416.3	25914.5	26356.7	17051.6	12539.6	664.879	13254.8	386.365
	240.8	0.9474	1.02214	1.07756	0.735729	0.750878	0.490377	0.338832	0.0138007	0.365762	0.00867752		240.8	32298.7	34846.6	36736.2	25082.4	25598.9	16717.9	11551.4	470.493	12469.6	295.834
	240.9	0.934274	1.01552	1.05727	0.710546	0.729	0.483706	0.309037	0.00683781	0.343129	0.00562701		240.9	31851.2	34621	36044.4	24223.9	24853	16490.5	10535.7	233.114	11697.9	191.836
	241	0.919947	1.00816	1.03626	0.685873	0.707303	0.478696	0.278694	0.000629464	0.321762	0.0028703		241	31362.8	34370.3	35328.1	23382.8	24113.3	16319.7	9501.23	21.4597	10969.5	97.8543
	241.1	0.904515	1.00073	1.0146	0.661805	0.684466	0.473698	0.248099	-0.00385829	0.301361	0.00220993		241.1	30836.7	34116.8	34589.8	22562.2	23334.8	16149.3	8458.19	-131.537	10274	75.3409
	241.2	0.888509	0.992164	0.991283	0.637599	0.660942	0.469184	0.217221	-0.00557913	0.281983	0.0029531		241.2	30291	33824.8	33794.8	21737	22532.8	15995.4	7405.49	-190.203	9613.34	100.677
	241.3	0.87128	0.983649	0.966803	0.612909	0.638245	0.465907	0.187016	-0.0056016	0.262319	0.00288444		241.3	29703.6	33534.5	32960.2	20895.3	21759	15883.7	6375.75	-190.97	8942.96	98.3363
	241.4	0.85425	0.97574	0.941928	0.587477	0.616128	0.463459	0.158641	-0.00550283	0.242866	0.00234923		241.4	29123.1	33264.9	32112.2	20028.2	21005	15800.2	5408.39	-187.602	8279.77	80.0897
	241.5	0.835718	0.968451	0.917636	0.56143	0.592839	0.462462	0.131847	-0.00558204	0.225428	0.00225078		241.5	28491.3	33016.4	31284	19140.2	20211	15766.2	4494.91	-190.303	7685.29	76.7334
	241.6	0.815807	0.961	0.893111	0.536148	0.567685	0.462694	0.107764	-0.005474	0.209901	0.00212246		241.6	27812.5	32762.4	30447.9	18278.3	19353.5	15774.1	3673.89	-186.619	7155.93	72.3589
	241.7	0.796099	0.952765	0.868668	0.511541	0.541756	0.463716	0.0859751	-0.00511433	0.196537	0.00154283		241.7	27140.6	32481.6	29614.6	17439.4	18469.5	15809	2931.06	-174.358	6700.32	52.598
	241.8	0.77748	0.944179	0.844066	0.488639	0.516324	0.4651	0.0663966	-0.00392785	0.186298	0.000226281		241.8	26505.8	32188.9	28775.8	16658.7	17602.5	15856.2	2263.59	-133.908	6351.28	7.71436
	241.9	0.758086	0.936158	0.819897	0.467944	0.489921	0.466816	0.0485447	-0.0025573	0.178462	-0.00236901		241.9	25844.6	31915.5	27951.9	15953.1	16702.4	15914.7	1654.98	-87.1833	6084.12	-80.7643
	242	0.737899	0.927011	0.797044	0.449866	0.462354	0.470582	0.0324189	-0.00120321	0.172035	-0.00606987		242	25156.4	31603.6	27172.8	15336.8	15762.6	16043.1	1105.22	-41.0196	5865.01	-206.934
	242.1	0.71657	0.915198	0.774628	0.433819	0.434599	0.476398	0.0185118	-0.00093144	0.165825	-0.00971134		242.1	24429.3	31200.9	26408.6	14789.8	14816.3	16241.3	631.102	-31.7546	5653.3	-331.079
	242.2	0.693379	0.900708	0.751934	0.419867	0.407143	0.482619	0.00650618	-0.00141554	0.158981	-0.012338		242.2	23638.6	30706.9	25634.9	14314.1	13880.3	16453.4	221.808	-48.2586	5419.97	-420.626
	242.3	0.668339	0.883308	0.730619	0.408383	0.379678	0.487654	-0.0051056	-0.00291517	0.1523	-0.0126192		242.3	22785	30113.7	24908.2	13922.6	12944	16625.1	-174.06	-99.3839	5192.2	-430.213
	242.4	0.642427	0.863773	0.710955	0.398009	0.351872	0.492074	-0.0165944	-0.00555386	0.146751	-0.010165		242.4	21901.6	29447.7	24237.9	13568.9	11996	16775.8	-565.735	-189.342	5003.03	-346.546
	242.5	0.614976	0.84176	0.691282	0.388078	0.323854	0.496476	-0.0284764	-0.0107846	0.14178	-0.00692618		242.5	20965.7	28697.2	23567.2	13230.3	11040.8	16925.8	-970.818	-367.667	4833.55	-236.127
	242.6	0.585528	0.818033	0.670432	0.378527	0.294295	0.501497	-0.0391659	-0.0176972	0.137495	-0.00447604		242.6	19961.8	27888.4	22856.3	12904.7	10033.1	17097	-1335.24	-603.332	4687.46	-152.597
	242.7	0.552984	0.792754	0.649168	0.369825	0.264161	0.505705	-0.0486241	-0.0235678	0.134045	-0.0018672		242.7	18852.3	27026.5	22131.4	12608.1	9005.75	17240.5	-1657.69	-803.472	4569.85	-63.6566
	242.8	0.516982	0.765791	0.627244	0.361122	0.233623	0.509575	-0.0580878	-0.0297584	0.130688	0.0017422		242.8	17624.9	26107.3	21384	12311.4	7964.65	17372.4	-1980.33	-1014.52	4455.42	59.3952
	242.9	0.478471	0.736213	0.603429	0.353009	0.203876	0.511361	-0.0674961	-0.0365487	0.126032	0.00632496		242.9	16312	25098.9	20572.1	12034.8	6950.51	17433.3	-2301.07	-1246.02	4296.68	215.63
	243	0.437984	0.70337	0.577899	0.346624	0.175331	0.510922	-0.0754444	-0.0439748	0.119565	0.0111533		243	14931.7	23979.3	19701.7	11817.1	5977.38	17418.3	-2572.05	-1499.19	4076.2	380.239
	243.1	0.396556	0.668256	0.550432	0.340777	0.147408	0.508275	-0.0815264	-0.0516257	0.112748	0.0151345		243.1	13519.4	22782.1	18765.3	11617.7	5025.42	17328.1	-2779.39	-1760.02	3843.8	515.963
	243.2	0.355115	0.6321	0.521614	0.334359	0.1194	0.503386	-0.0871305	-0.0595239	0.1059	0.0170276		243.2	12106.6	21549.5	17782.8	11398.9	4070.58	17161.4	-2970.45	-2029.29	3610.33	580.505
	243.3	0.314615	0.594709	0.492602	0.327734	0.0924861	0.496206	-0.0916112	-0.0669282	0.0983673	0.0181066		243.3	10725.8	20274.8	16793.8	11173.1	3153.03	16916.6	-3123.2	-2281.71	3353.53	617.289
	243.4	0.27535	0.55677	0.463715	0.32158	0.0681718	0.487537	-0.0945103	-0.0725005	0.0906242	0.0192111		243.4	9387.23	18981.4	15809	10963.3	2324.11	16621.1	-3222.04	-2471.68	3089.56	654.943
	243.5	0.238315	0.519229	0.434697	0.316288	0.0462826	0.4774	-0.0953777	-0.0760347	0.0824642	0.0195633		243.5	8124.63	17701.5	14819.7	10782.9	1577.86	16275.5	-3251.61	-2592.17	2811.37	666.95
	243.6	0.203951	0.483655	0.407119	0.312271	0.0256764	0.466302	-0.0948012	-0.0778746	0.0752601	0.0176079		243.6	6953.1	16488.8	13879.5	10645.9	875.357	15897.2	-3231.96	-2654.9	2565.76	600.286
	243.7	0.171567	0.450013	0.382219	0.309666	0.00608828	0.455119	-0.0923482	-0.0783509	0.0697842	0.0129506		243.7	5849.06	15341.8	13030.6	10557.1	207.561	15515.9	-3148.33	-2671.13	2379.08	441.513
	243.8	0.139494	0.417692	0.358559	0.308035	-0.0119452	0.441892	-0.0890028	-0.0774118	0.0655684	0.00708383		243.8	4755.63	14239.9	12224	10501.5	-407.237	15065	-3034.28	-2639.12	2235.35	241.502
	243.9	0.107537	0.386053	0.334284	0.306762	-0.0295053	0.426861	-0.0834469	-0.0761233	0.062671	-0.000202352		243.9	3666.14	13161.3	11396.4	10458.1	-1005.89	14552.5	-2844.87	-2595.19	2136.58	-6.89859
	244	0.0745194	0.354714	0.309735	0.306655	-0.0452323	0.409589	-0.0762711	-0.0742232	0.0598758	-0.00860571		244	2540.51	12092.9	10559.5	10454.5	-1542.06	13963.7	-2600.23	-2530.41	2041.28	-293.386
	244.1	0.0427513	0.32402	0.285917	0.306856	-0.058426	0.390466	-0.0684287	-0.070669	0.0565587	-0.0167487		244.1	1457.48	11046.5	9747.48	10461.3	-1991.86	13311.7	-2332.87	-2409.24	1928.2	-570.996
	244.2	0.0131985	0.295217	0.264479	0.307343	-0.0682586	0.370213	-0.0601563	-0.0655687	0.053379	-0.0236299		244.2	449.964	10064.5	9016.59	10477.9	-2327.07	12621.3	-2050.85	-2235.37	1819.79	-805.589
	244.3	-0.0145129	0.268073	0.245532	0.306658	-0.0748834	0.349374	-0.0514077	-0.0600483	0.0489253	-0.0303949		244.3	-494.772	9139.12	8370.67	10454.6	-2552.92	11910.9	-1752.59	-2047.16	1667.96	-1036.22
	244.4	-0.0404173	0.24216	0.228545	0.304645	-0.0786769	0.328461	-0.0426594	-0.0550418	0.0434158	-0.0392066		244.4	-1377.9	8255.71	7791.54	10385.9	-2682.25	11197.9	-1454.34	-1876.48	1480.13	-1336.63
	244.5	-0.0651813	0.217911	0.213435	0.301274	-0.0802298	0.307461	-0.0340848	-0.0501551	0.0373149	-0.0495849		244.5	-2222.16	7429	7276.42	10271	-2735.19	10482	-1162.02	-1709.88	1272.14	-1690.45
	244.6	-0.0884329	0.195965	0.200319	0.296384	-0.0817535	0.286893	-0.0267573	-0.0460927	0.0315349	-0.060492		244.6	-3014.85	6680.83	6829.28	10104.3	-2787.14	9780.75	-912.21	-1571.39	1075.09	-2062.29
	244.7	-0.111232	0.174807	0.187722	0.29048	-0.0834074	0.266649	-0.0213753	-0.042034	0.0265719	-0.0709781		244.7	-3792.12	5959.51	6399.79	9903.02	-2843.52	9090.59	-728.726	-1433.02	905.888	-2419.78
	244.8	-0.132975	0.153531	0.175285	0.284941	-0.0831337	0.247322	-0.0172103	-0.0372592	0.0218081	-0.0809335		244.8	-4533.36	5234.19	5975.82	9714.19	-2834.19	8431.68	-586.734	-1270.24	743.48	-2759.18
	244.9	-0.152917	0.132406	0.164345	0.279261	-0.0810577	0.228357	-0.0152051	-0.0323784	0.0174721	-0.0907375		244.9	-5213.25	4513.99	5602.86	9520.54	-2763.42	7785.13	-518.372	-1103.84	595.66	-3093.42
	245	-0.172023	0.112978	0.153749	0.273152	-0.0774634	0.209541	-0.0156354	-0.0265368	0.0136267	-0.099072		245	-5864.61	3851.64	5241.6	9312.3	-2640.88	7143.66	-533.041	-904.691	464.56	-3377.56
	245.1	-0.190556	0.094557	0.143807	0.266168	-0.0727692	0.190356	-0.0185757	-0.0198191	0.00876152	-0.105455		245.1	-6496.42	3223.63	4902.65	9074.18	-2480.84	6489.62	-633.281	-675.671	298.697	-3595.17
	245.2	-0.20795	0.0755769	0.134914	0.259047	-0.0664733	0.171787	-0.024397	-0.0131407	0.00319136	-0.109399		245.2	-7089.41	2576.56	4599.48	8831.41	-2266.21	5856.56	-831.742	-447.994	108.8	-3729.62
	245.3	-0.224399	0.0568954	0.126191	0.25148	-0.0583336	0.152771	-0.0334247	-0.00651166	-0.00207369	-0.111703		245.3	-7650.21	1939.68	4302.1	8573.45	-1988.71	5208.27	-1139.51	-221.995	-70.6962	-3808.19
	245.4	-0.239254	0.0393744	0.118157	0.243224	-0.0493426	0.132814	-0.0445483	0.00126888	-0.00587302	-0.113301		245.4	-8156.62	1342.35	4028.22	8291.99	-1682.18	4527.88	-1518.74	43.2584	-200.223	-3862.64
	245.5	-0.252126	0.0234248	0.111363	0.23406	-0.039412	0.112961	-0.0559136	0.0108355	-0.00719619	-0.115165		245.5	-8595.46	798.597	3796.59	7979.57	-1343.63	3851.05	-1906.2	369.402	-245.332	-3926.2
	245.6	-0.262988	0.00898222	0.105277	0.224544	-0.0293267	0.094775	-0.0654281	0.0215351	-0.00587633	-0.117477		245.6	-8965.77	306.221	3589.1	7655.15	-999.805	3231.07	-2230.57	734.172	-200.336	-4005.03
	245.7	-0.272787	-0.00400893	0.0997021	0.214497	-0.0190993	0.077808	-0.0731107	0.0330565	-0.00179027	-0.12049		245.7	-9299.85	-136.672	3399.04	7312.62	-651.132	2652.63	-2492.49	1126.96	-61.0336	-4107.75
	245.8	-0.281969	-0.0156891	0.0942823	0.204928	-0.00858602	0.0617949	-0.0797249	0.0453936	0.00448478	-0.123493		245.8	-9612.86	-534.872	3214.27	6986.39	-292.714	2106.71	-2717.98	1547.56	152.895	-4210.13
	245.9	-0.289047	-0.0267358	0.089839	0.195184	0.00234787	0.0464422	-0.086177	0.0593033	0.0113614	-0.125664		245.9	-9854.17	-911.476	3062.79	6654.2	80.0433	1583.3	-2937.94	2021.77	387.333	-4284.14
	246	-0.293343	-0.0378432	0.0861091	0.184967	0.0135363	0.0315678	-0.0926067	0.0736872	0.0178284	-0.127259		246	-10000.6	-1290.15	2935.63	6305.89	461.477	1076.21	-3157.14	2512.14	607.806	-4338.52
	246.1	-0.295017	-0.0491368	0.0823188	0.173382	0.0243073	0.0182041	-0.0986204	0.0883251	0.023128	-0.129475		246.1	-10057.7	-1675.17	2806.41	5910.92	828.684	620.614	-3362.16	3011.18	788.478	-4414.05
	246.2	-0.293509	-0.0605902	0.0784427	0.161062	0.0345802	0.00705679	-0.103888	0.103218	0.0295649	-0.132824		246.2	-10006.3	-2065.64	2674.26	5490.93	1178.91	240.58	-3541.74	3518.89	1007.93	-4528.22
	246.3	-0.289493	-0.0700238	0.0750858	0.148406	0.0443564	-0.00199119	-0.107873	0.117518	0.0376058	-0.136065		246.3	-9869.38	-2387.25	2559.82	5059.44	1512.2	-67.8837	-3677.59	4006.41	1282.05	-4638.71
	246.4	-0.283859	-0.077336	0.0730061	0.135567	0.0534063	-0.00878872	-0.111043	0.131377	0.0489103	-0.138372		246.4	-9677.32	-2636.54	2488.92	4621.74	1820.73	-299.625	-3785.68	4478.91	1667.45	-4717.36
	246.5	-0.277248	-0.0822718	0.07194	0.12407	0.0620495	-0.0130238	-0.113968	0.144413	0.062394	-0.139879		246.5	-9451.94	-2804.81	2452.58	4229.8	2115.39	-444.007	-3885.4	4923.33	2127.13	-4768.73
	246.6	-0.269946	-0.0849908	0.070951	0.113773	0.0710294	-0.0148546	-0.116738	0.157112	0.0775168	-0.140823		246.6	-9202.98	-2897.5	2418.86	3878.73	2421.53	-506.423	-3979.81	5356.26	2642.7	-4800.95
	246.7	-0.261921	-0.0860069	0.070148	0.103886	0.0800581	-0.0145627	-0.119512	0.168383	0.0937561	-0.141066		246.7	-8929.39	-2932.14	2391.48	3541.69	2729.34	-496.471	-4074.39	5740.5	3196.33	-4809.22
	246.8	-0.254984	-0.0855569	0.0690228	0.0941923	0.0886042	-0.01317	-0.122648	0.178356	0.110783	-0.13995		246.8	-8692.91	-2916.8	2353.12	3211.2	3020.69	-448.991	-4181.3	6080.49	3776.8	-4771.17
	246.9	-0.249584	-0.0841803	0.0675153	0.0834937	0.0967733	-0.0108528	-0.126183	0.185516	0.127623	-0.136872		246.9	-8508.79	-2869.87	2301.73	2846.46	3299.19	-369.993	-4301.84	6324.6	4350.91	-4666.24
	247	-0.244624	-0.0831427	0.0646503	0.0711453	0.105442	-0.0085132	-0.130099	0.190132	0.143985	-0.131207		247	-8339.71	-2834.5	2204.05	2425.48	3594.71	-290.232	-4435.33	6481.98	4908.74	-4473.09
	247.1	-0.239474	-0.0827749	0.0613502	0.0569183	0.114772	-0.00627478	-0.133726	0.192139	0.158966	-0.122636		247.1	-8164.15	-2821.96	2091.55	1940.46	3912.8	-213.919	-4558.99	6550.41	5419.46	-4180.91
	247.2	-0.234626	-0.0828696	0.0586917	0.0409174	0.12383	-0.00476282	-0.137866	0.192223	0.17306	-0.113142		247.2	-7998.86	-2825.19	2000.92	1394.95	4221.62	-162.374	-4700.13	6553.24	5899.97	-3857.22
	247.3	-0.230166	-0.0834659	0.0578736	0.0231851	0.130183	-0.00272041	-0.142376	0.191105	0.18689	-0.102261		247.3	-7846.8	-2845.52	1973.02	790.427	4438.18	-92.7442	-4853.87	6515.13	6371.43	-3486.27
	247.4	-0.227403	-0.0843147	0.0578823	0.00482099	0.133764	0.00017775	-0.14647	0.188898	0.20073	-0.0917057		247.4	-7752.6	-2874.45	1973.32	164.357	4560.27	6.05984	-4993.46	6439.9	6843.28	-3126.43
	247.5	-0.227882	-0.0864189	0.0582072	-0.0130107	0.135084	0.00265808	-0.149622	0.185286	0.214799	-0.0825702		247.5	-7768.95	-2946.19	1984.4	-443.561	4605.29	90.6191	-5100.92	6316.77	7322.93	-2814.98
	247.6	-0.230031	-0.0892979	0.0586858	-0.030163	0.133985	0.00446365	-0.151081	0.181283	0.228698	-0.0739451		247.6	-7842.2	-3044.34	2000.71	-1028.32	4567.8	152.175	-5150.66	6180.27	7796.77	-2520.93
	247.7	-0.23368	-0.0932883	0.0590723	-0.0465334	0.13161	0.00533193	-0.151912	0.176591	0.242561	-0.0633455		247.7	-7966.61	-3180.38	2013.89	-1586.42	4486.85	181.776	-5178.96	6020.32	8269.38	-2159.57
	247.8	-0.238378	-0.0978465	0.0592617	-0.0623304	0.128871	0.00595518	-0.151636	0.168806	0.256002	-0.0514986		247.8	-8126.76	-3335.78	2020.35	-2124.97	4393.48	203.024	-5169.56	5754.94	8727.6	-1755.69
	247.9	-0.242507	-0.103806	0.0591269	-0.0767905	0.126433	0.00493737	-0.14894	0.158284	0.267517	-0.0399066		247.9	-8267.52	-3538.94	2015.75	-2617.94	4310.34	168.324	-5077.66	5396.22	9120.16	-1360.49
	248	-0.245703	-0.110664	0.0592974	-0.0894253	0.123851	0.00296077	-0.144001	0.146542	0.276771	-0.0290499		248	-8376.5	-3772.76	2021.56	-3048.68	4222.33	100.939	-4909.28	4995.92	9435.67	-990.369
	248.1	-0.247234	-0.117912	0.0607599	-0.101305	0.120871	0.000385894	-0.138024	0.133956	0.284855	-0.019696		248.1	-8428.7	-4019.86	2071.42	-3453.7	4120.71	13.1559	-4705.52	4566.82	9711.26	-671.474
	248.2	-0.248697	-0.124654	0.0634253	-0.112131	0.117888	-0.00248535	-0.132117	0.120589	0.291785	-0.0109185		248.2	-8478.57	-4249.7	2162.29	-3822.76	4019.02	-84.7304	-4504.12	4111.1	9947.52	-372.234
	248.3	-0.250667	-0.131245	0.0674317	-0.121184	0.115419	-0.00481278	-0.125438	0.106981	0.297362	-0.00236168		248.3	-8545.71	-4474.39	2298.88	-4131.4	3934.86	-164.077	-4276.42	3647.18	10137.6	-80.5143
	248.4	-0.253281	-0.137532	0.0728793	-0.129147	0.112952	-0.00598088	-0.118252	0.0933542	0.303117	0.00529148		248.4	-8634.84	-4688.73	2484.6	-4402.89	3850.75	-203.9	-4031.45	3182.63	10333.8	180.397
	248.5	-0.255922	-0.142438	0.0793966	-0.137693	0.109749	-0.00783529	-0.109608	0.0798241	0.30904	0.0111094		248.5	-8724.9	-4855.99	2706.79	-4694.21	3741.56	-267.12	-3736.76	2721.36	10535.8	378.742
	248.6	-0.258346	-0.14588	0.0873593	-0.146448	0.106667	-0.0116827	-0.0993251	0.0665993	0.315372	0.0158274		248.6	-8807.51	-4973.32	2978.25	-4992.7	3636.5	-398.287	-3386.19	2270.5	10751.6	539.588
	248.7	-0.259857	-0.14836	0.0952516	-0.154475	0.104442	-0.017721	-0.088163	0.0529605	0.320999	0.0203692		248.7	-8859.03	-5057.89	3247.31	-5266.37	3560.63	-604.144	-3005.65	1805.53	10943.5	694.426
	248.8	-0.260297	-0.149838	0.101966	-0.161697	0.103914	-0.0258371	-0.0770703	0.0388348	0.325007	0.0254712		248.8	-8874.03	-5108.26	3476.23	-5512.56	3542.65	-880.837	-2627.48	1323.95	11080.1	868.363
	248.9	-0.259927	-0.149925	0.107172	-0.168823	0.10515	-0.0346681	-0.0661824	0.0246941	0.327328	0.0306948		248.9	-8861.41	-5111.25	3653.72	-5755.52	3584.77	-1181.9	-2256.29	841.871	11159.2	1046.45
	249	-0.258809	-0.148546	0.111848	-0.175735	0.108201	-0.0443441	-0.0561898	0.0125218	0.327379	0.0356731		249	-8823.31	-5064.24	3813.11	-5991.14	3688.77	-1511.78	-1915.62	426.893	11161	1216.17
	249.1	-0.25629	-0.145617	0.116185	-0.18295	0.111971	-0.0531857	-0.0454756	0.00251064	0.324633	0.039866		249.1	-8737.42	-4964.36	3960.98	-6237.11	3817.32	-1813.2	-1550.35	85.5926	11067.4	1359.11
	249.2	-0.252878	-0.141306	0.119638	-0.189977	0.116971	-0.0612248	-0.0345853	-0.00585841	0.319645	0.0434114		249.2	-8621.1	-4817.4	4078.68	-6476.7	3987.77	-2087.27	-1179.08	-199.725	10897.3	1479.98
	249.3	-0.248824	-0.135045	0.12244	-0.197389	0.122411	-0.0686826	-0.0230965	-0.0139832	0.313135	0.0456597		249.3	-8482.91	-4603.95	4174.22	-6729.37	4173.22	-2341.52	-787.404	-476.713	10675.4	1556.63
	249.4	-0.243529	-0.126622	0.124601	-0.203467	0.128196	-0.0754998	-0.0110643	-0.0215997	0.30645	0.0470401		249.4	-8302.37	-4316.79	4247.9	-6936.58	4370.44	-2573.94	-377.205	-736.376	10447.5	1603.69
	249.5	-0.237666	-0.115426	0.126596	-0.207905	0.134381	-0.0821865	0.000410456	-0.0281646	0.298706	0.0482529		249.5	-8102.51	-3935.11	4315.92	-7087.88	4581.32	-2801.9	13.9932	-960.185	10183.5	1645.04
	249.6	-0.231044	-0.101995	0.12908	-0.211415	0.140213	-0.0884909	0.0106327	-0.0337709	0.290059	0.0491103		249.6	-7876.74	-3477.21	4400.59	-7207.56	4780.13	-3016.83	362.488	-1151.31	9888.67	1674.27
	249.7	-0.223112	-0.0887306	0.131204	-0.214107	0.146379	-0.0951357	0.0195471	-0.0380337	0.278972	0.0493447		249.7	-7606.34	-3025	4473	-7299.33	4990.33	-3243.36	666.397	-1296.64	9510.71	1682.26
	249.8	-0.213134	-0.0761739	0.133036	-0.215701	0.151975	-0.102836	0.0274484	-0.0402885	0.264702	0.0489243		249.8	-7266.17	-2596.92	4535.46	-7353.66	5181.14	-3505.88	935.771	-1373.51	9024.22	1667.92
	249.9	-0.201592	-0.064165	0.134755	-0.2167	0.155581	-0.112152	0.0341104	-0.0415714	0.24807	0.047478		249.9	-6872.67	-2187.51	4594.05	-7387.73	5304.05	-3823.49	1162.89	-1417.25	8457.2	1618.62
	250	-0.189915	-0.0520993	0.135969	-0.217506	0.15798	-0.122612	0.0399511	-0.0420572	0.22987	0.0443043		250	-6474.58	-1776.17	4635.45	-7415.2	5385.84	-4180.08	1362.01	-1433.81	7836.72	1510.42
	250.1	-0.177774	-0.0413503	0.137829	-0.218652	0.159157	-0.133353	0.0455714	-0.0424587	0.210435	0.0390137		250.1	-6060.67	-1409.71	4698.87	-7454.27	5425.96	-4546.26	1553.62	-1447.5	7174.14	1330.05
	250.2	-0.165081	-0.0320199	0.139991	-0.220074	0.158921	-0.143405	0.0517625	-0.0421186	0.19053	0.0309702		250.2	-5627.92	-1091.62	4772.56	-7502.76	5417.92	-4888.94	1764.68	-1435.9	6495.52	1055.83
	250.3	-0.151834	-0.0229193	0.140439	-0.221131	0.157099	-0.153115	0.0590255	-0.0402381	0.171043	0.0197761		250.3	-5176.31	-781.363	4787.83	-7538.79	5355.81	-5220.01	2012.3	-1371.79	5831.19	674.206
	250.4	-0.138173	-0.0131906	0.139728	-0.221235	0.15367	-0.161442	0.0678809	-0.0365162	0.152337	0.00587813		250.4	-4710.6	-449.695	4763.6	-7542.33	5238.91	-5503.86	2314.19	-1244.91	5193.47	200.397
	250.5	-0.123269	-0.00208309	0.138155	-0.219587	0.149085	-0.16588	0.0778837	-0.0316874	0.134152	-0.00927065		250.5	-4202.47	-71.0165	4709.98	-7486.14	5082.6	-5655.18	2655.21	-1080.28	4573.51	-316.055
	250.6	-0.105816	0.0106411	0.13502	-0.21648	0.144861	-0.166822	0.0889858	-0.026543	0.116055	-0.0247099		250.6	-3607.46	362.775	4603.08	-7380.24	4938.58	-5687.29	3033.7	-904.904	3956.53	-842.409
	250.7	-0.0865215	0.0234891	0.129826	-0.212401	0.141824	-0.165299	0.100628	-0.0212521	0.0980897	-0.0403985		250.7	-2949.69	800.79	4426.02	-7241.18	4835.06	-5635.36	3430.61	-724.526	3344.07	-1377.26
	250.8	-0.0650234	0.035748	0.122815	-0.207388	0.139056	-0.161146	0.11169	-0.0156683	0.0799635	-0.0564018		250.8	-2216.77	1218.72	4187.01	-7070.25	4740.71	-5493.78	3807.72	-534.162	2726.11	-1922.85
	250.9	-0.0414391	0.0473041	0.113879	-0.202348	0.136719	-0.154853	0.122183	-0.00985619	0.0613624	-0.0730588		250.9	-1412.74	1612.69	3882.36	-6898.43	4661.02	-5279.24	4165.44	-336.017	2091.96	-2490.72
	251	-0.0164362	0.0592664	0.103203	-0.197058	0.134757	-0.14613	0.132177	-0.00403738	0.042374	-0.0916814		251	-560.341	2020.51	3518.41	-6718.08	4594.13	-4981.86	4506.18	-137.642	1444.61	-3125.6
	251.1	0.00934538	0.072229	0.0910229	-0.192064	0.133113	-0.135348	0.142427	0.00246792	0.0232877	-0.111392		251.1	318.602	2462.43	3103.15	-6547.83	4538.08	-4614.27	4855.61	84.136	793.921	-3797.59
	251.2	0.0354526	0.0868072	0.0777911	-0.187208	0.132466	-0.122444	0.152168	0.00921206	0.00579648	-0.129672		251.2	1208.65	2959.43	2652.05	-6382.29	4516.02	-4174.34	5187.69	314.057	197.613	-4420.76
	251.3	0.0602036	0.103647	0.0643821	-0.182706	0.133568	-0.107787	0.161752	0.0159643	-0.00990694	-0.146287		251.3	2052.46	3533.53	2194.91	-6228.81	4553.58	-3674.68	5514.44	544.254	-337.747	-4987.22
	251.4	0.0831924	0.122116	0.0501877	-0.178859	0.136336	-0.0917329	0.170694	0.0220066	-0.0235704	-0.161932		251.4	2836.19	4163.17	1711	-6097.64	4647.95	-3127.35	5819.28	750.25	-803.561	-5520.57
	251.5	0.104681	0.140622	0.0354565	-0.1752	0.139727	-0.0746682	0.179611	0.0275829	-0.0367712	-0.176802		251.5	3568.77	4794.07	1208.78	-5972.91	4763.57	-2545.59	6123.3	940.356	-1253.6	-6027.51
	251.6	0.124365	0.1587	0.019804	-0.172871	0.143324	-0.057334	0.189095	0.0338145	-0.049564	-0.191029		251.6	4239.85	5410.39	675.158	-5893.5	4886.21	-1954.63	6446.63	1152.8	-1689.73	-6512.55
	251.7	0.142777	0.176285	0.00317386	-0.172276	0.14702	-0.0403632	0.199586	0.0398843	-0.0619893	-0.204063		251.7	4867.56	6009.89	108.203	-5873.22	5012.21	-1376.06	6804.26	1359.73	-2113.34	-6956.92
	251.8	0.158549	0.193988	-0.0150853	-0.172135	0.1512	-0.0247275	0.21013	0.0458242	-0.0743296	-0.216393		251.8	5405.25	6613.45	-514.288	-5868.42	5154.71	-843.007	7163.75	1562.24	-2534.04	-7377.27
	251.9	0.172198	0.211419	-0.0344362	-0.172467	0.155749	-0.00837958	0.220894	0.0512466	-0.0865089	-0.228106		251.9	5870.57	7207.67	-1174	-5879.74	5309.79	-285.676	7530.71	1747.1	-2949.26	-7776.59
	252	0.184058	0.228514	-0.0530762	-0.173563	0.159593	0.00877404	0.231099	0.056381	-0.0983714	-0.239768		252	6274.88	7790.48	-1809.47	-5917.11	5440.85	299.124	7878.6	1922.14	-3353.67	-8174.15
	252.1	0.193701	0.243954	-0.0695657	-0.17467	0.161982	0.0272378	0.240756	0.0606318	-0.110082	-0.252216		252.1	6603.66	8316.86	-2371.63	-5954.85	5522.29	928.589	8207.85	2067.06	-3752.9	-8598.55
	252.2	0.201213	0.257066	-0.0845371	-0.175941	0.162572	0.0465204	0.249454	0.0627968	-0.121456	-0.265012		252.2	6859.74	8763.87	-2882.03	-5998.17	5542.39	1585.97	8504.39	2140.87	-4140.67	-9034.78
	252.3	0.206829	0.26792	-0.0972228	-0.177173	0.161163	0.0664649	0.257489	0.0627599	-0.131901	-0.27612		252.3	7051.22	9133.93	-3314.51	-6040.17	5494.36	2265.92	8778.31	2139.61	-4496.78	-9413.45
	252.4	0.210455	0.27708	-0.107577	-0.178342	0.159543	0.0862182	0.264013	0.060839	-0.14031	-0.285459		252.4	7174.82	9446.19	-3667.52	-6080.04	5439.12	2939.35	9000.72	2074.12	-4783.45	-9731.84
	252.5	0.212502	0.284359	-0.115992	-0.179194	0.158506	0.105466	0.26902	0.0570078	-0.146809	-0.29314		252.5	7244.6	9694.34	-3954.4	-6109.07	5403.77	3595.54	9171.41	1943.51	-5005.01	-9993.7
	252.6	0.213155	0.289374	-0.122979	-0.179102	0.158165	0.124878	0.272402	0.0519965	-0.151491	-0.298141		252.6	7266.89	9865.33	-4192.6	-6105.95	5392.16	4257.32	9286.7	1772.66	-5164.62	-10164.2
	252.7	0.211614	0.291755	-0.128494	-0.178207	0.159034	0.143237	0.273411	0.0455904	-0.155146	-0.300168		252.7	7214.35	9946.49	-4380.62	-6075.41	5421.77	4883.23	9321.13	1554.27	-5289.22	-10233.3
	252.8	0.208216	0.292459	-0.133172	-0.176109	0.160315	0.160718	0.272672	0.0367147	-0.158159	-0.299916		252.8	7098.5	9970.5	-4540.1	-6003.9	5465.44	5479.2	9295.93	1251.68	-5391.95	-10224.7
	252.9	0.203413	0.290714	-0.137899	-0.173282	0.162038	0.176856	0.269872	0.0264804	-0.161122	-0.298111		252.9	6934.76	9911.01	-4701.26	-5907.51	5524.19	6029.35	9200.47	902.769	-5492.97	-10163.2
	253	0.196272	0.28697	-0.142853	-0.169757	0.163992	0.191874	0.264837	0.0160461	-0.163051	-0.294733		253	6691.31	9783.35	-4870.15	-5787.36	5590.8	6541.37	9028.81	547.044	-5558.73	-10048
	253.1	0.186842	0.282173	-0.148202	-0.166362	0.166662	0.205623	0.258476	0.00481105	-0.162555	-0.289387		253.1	6369.82	9619.82	-5052.5	-5671.61	5681.84	7010.09	8811.95	164.018	-5541.82	-9865.78
	253.2	0.175726	0.276657	-0.154206	-0.163386	0.17004	0.218329	0.251927	-0.00616145	-0.159834	-0.281093		253.2	5990.83	9431.77	-5257.2	-5570.14	5796.99	7443.26	8588.67	-210.056	-5449.04	-9583.01
	253.3	0.164986	0.269534	-0.160339	-0.160982	0.173614	0.229153	0.245015	-0.0152882	-0.155832	-0.270203		253.3	5624.69	9188.93	-5466.25	-5488.2	5918.83	7812.28	8353.05	-521.204	-5312.61	-9211.74
	253.4	0.155222	0.261426	-0.166797	-0.158934	0.177805	0.23784	0.237501	-0.0234904	-0.151012	-0.256283		253.4	5291.84	8912.52	-5686.43	-5418.36	6061.73	8108.44	8096.87	-800.832	-5148.31	-8737.18
	253.5	0.147325	0.252481	-0.174024	-0.156916	0.183507	0.243564	0.228942	-0.0309493	-0.145637	-0.238276		253.5	5022.59	8607.56	-5932.81	-5349.58	6256.1	8303.58	7805.09	-1055.12	-4965.05	-8123.29
	253.6	0.141121	0.24206	-0.180746	-0.153806	0.191213	0.246781	0.219007	-0.0377191	-0.140421	-0.216284		253.6	4811.09	8252.3	-6161.97	-5243.56	6518.82	8413.25	7466.38	-1285.92	-4787.24	-7373.54
	253.7	0.135551	0.230102	-0.186587	-0.149549	0.200267	0.248945	0.207011	-0.0440788	-0.136044	-0.191702		253.7	4621.21	7844.64	-6361.13	-5098.43	6827.49	8487.02	7057.42	-1502.73	-4638.01	-6535.51
	253.8	0.130076	0.216801	-0.191502	-0.145571	0.209806	0.249011	0.194429	-0.0489079	-0.13253	-0.165422		253.8	4434.55	7391.16	-6528.69	-4962.81	7152.68	8489.26	6628.46	-1667.36	-4518.21	-5639.56
	253.9	0.123518	0.20202	-0.195501	-0.141652	0.218607	0.246187	0.181539	-0.0513171	-0.129703	-0.13781		253.9	4210.97	6887.26	-6665.02	-4829.2	7452.74	8393	6189.01	-1749.5	-4421.82	-4698.21
	254	0.116251	0.18595	-0.197972	-0.138368	0.226894	0.240803	0.167983	-0.0520585	-0.127751	-0.109225		254	3963.22	6339.4	-6749.25	-4717.23	7735.26	8209.43	5726.86	-1774.78	-4355.26	-3723.69
	254.1	0.109116	0.170093	-0.19962	-0.136277	0.234717	0.233503	0.153458	-0.0526986	-0.126164	-0.0791637		254.1	3719.98	5798.79	-6805.43	-4645.95	8001.96	7960.59	5231.67	-1796.6	-4301.17	-2698.85
	254.2	0.102813	0.155307	-0.200559	-0.135014	0.242193	0.224253	0.137758	-0.0536772	-0.123591	-0.0470939		254.2	3505.1	5294.7	-6837.44	-4602.88	8256.82	7645.22	4696.43	-1829.96	-4213.46	-1605.52
	254.3	0.0966922	0.141535	-0.199424	-0.134269	0.248342	0.213359	0.120981	-0.0548238	-0.119479	-0.0139919		254.3	3296.42	4825.2	-6798.74	-4577.5	8466.48	7273.82	4124.46	-1869.05	-4073.27	-477.012
	254.4	0.0910572	0.12733	-0.196897	-0.133152	0.253421	0.201324	0.102914	-0.0556241	-0.114414	0.0192775		254.4	3104.32	4340.92	-6712.6	-4539.41	8639.61	6863.52	3508.55	-1896.34	-3900.59	657.209
	254.5	0.086332	0.112503	-0.192666	-0.132166	0.256367	0.18752	0.0830086	-0.0558253	-0.109402	0.0509197		254.5	2943.23	3835.46	-6568.35	-4505.79	8740.06	6392.93	2829.93	-1903.19	-3729.72	1735.95
	254.6	0.0827869	0.0964588	-0.186767	-0.132347	0.256845	0.172586	0.0622104	-0.0560912	-0.105358	0.080636		254.6	2822.37	3288.47	-6367.26	-4511.97	8756.36	5883.79	2120.87	-1912.26	-3591.86	2749.04
	254.7	0.0804065	0.0791029	-0.179286	-0.132751	0.254471	0.156468	0.0416195	-0.0558204	-0.102766	0.1092		254.7	2741.22	2696.77	-6112.22	-4525.73	8675.4	5334.3	1418.89	-1903.03	-3503.49	3722.84
	254.8	0.0788748	0.0615456	-0.171018	-0.132899	0.249649	0.139011	0.0212697	-0.0548425	-0.101179	0.136797		254.8	2689	2098.21	-5830.32	-4530.8	8511.02	4739.17	725.125	-1869.69	-3449.38	4663.66
	254.9	0.0779862	0.0440465	-0.162332	-0.132885	0.243517	0.12116	0.00100514	-0.0538832	-0.0998037	0.162909		254.9	2658.7	1501.63	-5534.22	-4530.31	8301.98	4130.59	34.2673	-1836.98	-3402.5	5553.87
	255	0.0771477	0.0269116	-0.152805	-0.132551	0.2364	0.102995	-0.0192308	-0.0531901	-0.0984927	0.188119		255	2630.11	917.467	-5209.41	-4518.93	8059.33	3511.29	-655.614	-1813.35	-3357.81	6413.34
	255.1	0.0779812	0.0103425	-0.142747	-0.131317	0.227329	0.085056	-0.0384394	-0.0528959	-0.097329	0.212378		255.1	2658.53	352.595	-4866.52	-4476.85	7750.1	2899.72	-1310.48	-1803.32	-3318.13	7240.39
	255.2	0.0798848	-0.00587444	-0.132981	-0.129168	0.21672	0.0672823	-0.0562942	-0.0529666	-0.0963662	0.235716		255.2	2723.43	-200.271	-4533.57	-4403.58	7388.4	2293.79	-1919.18	-1805.74	-3285.31	8036
	255.3	0.0819918	-0.0215657	-0.124469	-0.126446	0.204848	0.0499272	-0.0723517	-0.0537407	-0.0954064	0.258639		255.3	2795.26	-735.218	-4243.4	-4310.79	6983.66	1702.12	-2466.61	-1832.13	-3252.59	8817.5
	255.4	0.0841346	-0.0361482	-0.116748	-0.123555	0.192309	0.0341192	-0.0864806	-0.0541031	-0.0940044	0.281902		255.4	2868.31	-1232.36	-3980.15	-4212.24	6556.19	1163.19	-2948.29	-1844.48	-3204.8	9610.59
	255.5	0.0866033	-0.0489123	-0.109323	-0.120803	0.179138	0.0192355	-0.0983542	-0.0529651	-0.092581	0.305026		255.5	2952.48	-1667.51	-3727.04	-4118.4	6107.17	655.777	-3353.09	-1805.68	-3156.27	10398.9
	255.6	0.0894888	-0.0608601	-0.103716	-0.117621	0.16484	0.00456318	-0.10809	-0.0503887	-0.0910402	0.327101		255.6	3050.85	-2074.84	-3535.88	-4009.95	5619.73	155.568	-3685	-1717.85	-3103.74	11151.5
	255.7	0.0923824	-0.0739681	-0.100754	-0.11383	0.149904	-0.010266	-0.116212	-0.047055	-0.0893811	0.347272		255.7	3149.5	-2521.72	-3434.89	-3880.68	5110.51	-349.989	-3961.89	-1604.2	-3047.18	11839.2
	255.8	0.0956915	-0.0873482	-0.0995824	-0.110507	0.134613	-0.0262435	-0.123205	-0.0436448	-0.0882371	0.365546		255.8	3262.31	-2977.87	-3394.96	-3767.38	4589.22	-894.693	-4200.3	-1487.94	-3008.17	12462.2
	255.9	0.0991066	-0.0995379	-0.099288	-0.108516	0.11908	-0.0438994	-0.128942	-0.0402737	-0.0873517	0.38169		255.9	3378.74	-3393.44	-3384.92	-3699.52	4059.68	-1496.62	-4395.87	-1373.01	-2977.99	13012.6
	256	0.102814	-0.109484	-0.0996137	-0.108051	0.103371	-0.062002	-0.132868	-0.0370607	-0.0863372	0.395558		256	3505.13	-3732.52	-3396.03	-3683.69	3524.1	-2113.77	-4529.75	-1263.47	-2943.4	13485.4
	256.1	0.105927	-0.118021	-0.0995594	-0.10886	0.0885992	-0.0798689	-0.134576	-0.0337355	-0.0842849	0.407857		256.1	3611.25	-4023.58	-3394.17	-3711.25	3020.52	-2722.89	-4587.97	-1150.11	-2873.44	13904.6
	256.2	0.107665	-0.125658	-0.0983146	-0.109574	0.0747256	-0.0965959	-0.13322	-0.0302055	-0.0808026	0.419062		256.2	3670.52	-4283.92	-3351.74	-3735.61	2547.54	-3293.14	-4541.72	-1029.77	-2754.72	14286.6
	256.3	0.107783	-0.13207	-0.0958987	-0.1099	0.0610225	-0.112342	-0.128178	-0.0256934	-0.0766538	0.42808		256.3	3674.52	-4502.51	-3269.37	-3746.71	2080.37	-3829.95	-4369.84	-875.938	-2613.28	14594.1
	256.4	0.10641	-0.137232	-0.0928905	-0.110263	0.0471408	-0.126495	-0.120606	-0.0202299	-0.0730404	0.434629		256.4	3627.71	-4678.52	-3166.82	-3759.09	1607.12	-4312.46	-4111.69	-689.678	-2490.09	14817.4
	256.5	0.103256	-0.141156	-0.0890514	-0.109846	0.0336052	-0.139194	-0.110733	-0.0143188	-0.0706869	0.438333		256.5	3520.2	-4812.29	-3035.94	-3744.85	1145.67	-4745.4	-3775.09	-488.155	-2409.85	14943.6
	256.6	0.0988439	-0.142966	-0.0847888	-0.108757	0.0202787	-0.150705	-0.098764	-0.009021	-0.0685533	0.4401		256.6	3369.78	-4873.99	-2890.62	-3707.72	691.342	-5137.82	-3367.06	-307.543	-2337.12	15003.9
	256.7	0.0929989	-0.142743	-0.0804633	-0.106699	0.00648175	-0.160745	-0.0853468	-0.00507746	-0.0656065	0.440011		256.7	3170.52	-4866.38	-2743.15	-3637.59	220.976	-5480.12	-2909.64	-173.101	-2236.65	15000.8
	256.8	0.0858068	-0.140984	-0.0764919	-0.103027	-0.00829905	-0.168716	-0.0702658	-0.0016165	-0.0626351	0.43723		256.8	2925.32	-4806.43	-2607.76	-3512.4	-282.931	-5751.86	-2395.5	-55.1096	-2135.35	14906
	256.9	0.0781111	-0.138424	-0.0718108	-0.098761	-0.0247828	-0.174205	-0.0540688	0.00117451	-0.0592494	0.431493		256.9	2662.96	-4719.13	-2448.17	-3366.96	-844.892	-5938.98	-1843.31	40.0412	-2019.93	14710.4
	257	0.0709699	-0.135212	-0.0659391	-0.0947708	-0.0429079	-0.178063	-0.0372158	0.00353277	-0.0549245	0.423952		257	2419.5	-4609.62	-2247.99	-3230.92	-1462.81	-6070.52	-1268.76	120.439	-1872.48	14453.4
	257.1	0.0640195	-0.131967	-0.0599281	-0.0910336	-0.0609618	-0.181003	-0.020896	0.00507904	-0.0501564	0.415119		257.1	2182.55	-4499	-2043.07	-3103.51	-2078.31	-6170.74	-712.387	173.154	-1709.93	14152.2
	257.2	0.0568913	-0.127819	-0.0540643	-0.0887122	-0.0778197	-0.182921	-0.00533541	0.00516776	-0.0445306	0.405341		257.2	1939.54	-4357.6	-1843.16	-3024.37	-2653.03	-6236.15	-181.895	176.179	-1518.13	13818.9
	257.3	0.0489637	-0.122727	-0.0479674	-0.0868187	-0.0939522	-0.184418	0.00915669	0.0050946	-0.0379523	0.394334		257.3	1669.27	-4184.02	-1635.3	-2959.82	-3203.01	-6287.17	312.169	173.685	-1293.87	13443.6
	257.4	0.0410542	-0.117526	-0.042747	-0.084204	-0.109161	-0.186122	0.0229468	0.00661208	-0.0307672	0.38168		257.4	1399.62	-4006.68	-1457.33	-2870.68	-3721.52	-6345.27	782.302	225.419	-1048.91	13012.2
	257.5	0.032289	-0.112806	-0.0389591	-0.0805712	-0.12303	-0.188183	0.0367289	0.00950657	-0.0241328	0.367165		257.5	1100.8	-3845.78	-1328.19	-2746.83	-4194.35	-6415.52	1252.16	324.097	-822.734	12517.4
	257.6	0.0231893	-0.109088	-0.037445	-0.0760525	-0.13574	-0.19019	0.0506788	0.0135435	-0.0182016	0.351959		257.6	790.568	-3719.02	-1276.57	-2592.78	-4627.63	-6483.95	1727.74	461.724	-620.527	11999
	257.7	0.0146028	-0.105677	-0.0378345	-0.0711221	-0.14752	-0.193054	0.0641779	0.0185255	-0.0133616	0.336192		257.7	497.837	-3602.74	-1289.85	-2424.69	-5029.24	-6581.58	2187.95	631.57	-455.523	11461.4
	257.8	0.00623612	-0.102968	-0.039829	-0.0657788	-0.158052	-0.195665	0.0776247	0.0238829	-0.00897023	0.320007		257.8	212.601	-3510.38	-1357.85	-2242.53	-5388.31	-6670.59	2646.38	814.214	-305.813	10909.7
	257.9	-0.00140061	-0.101719	-0.0428334	-0.0597403	-0.166992	-0.197874	0.0907826	0.0301689	-0.00359565	0.304107		257.9	-47.7497	-3467.78	-1460.27	-2036.66	-5693.07	-6745.9	3094.96	1028.52	-122.583	10367.6
	258	-0.00786376	-0.101283	-0.0463881	-0.0530451	-0.174045	-0.200507	0.103847	0.0371192	0.00300952	0.288614		258	-268.091	-3452.95	-1581.46	-1808.41	-5933.55	-6835.68	3540.36	1265.47	102.6	9839.42
	258.1	-0.0125577	-0.100504	-0.0507182	-0.0469351	-0.179175	-0.202569	0.116758	0.0436936	0.0100513	0.273591		258.1	-428.116	-3426.39	-1729.08	-1600.11	-6108.41	-6905.98	3980.51	1489.6	342.67	9327.24
	258.2	-0.0148706	-0.0995693	-0.0549669	-0.0415546	-0.182791	-0.204067	0.129121	0.0498011	0.0172618	0.259315		258.2	-506.969	-3394.51	-1873.93	-1416.68	-6231.69	-6957.03	4401.99	1697.82	588.49	8840.54
	258.3	-0.0146553	-0.09861	-0.0592825	-0.0363603	-0.185395	-0.205447	0.140426	0.0553041	0.0239523	0.245595		258.3	-499.628	-3361.81	-2021.06	-1239.59	-6320.47	-7004.1	4787.39	1885.42	816.58	8372.8
	258.4	-0.0137856	-0.0979465	-0.0627617	-0.0316198	-0.185912	-0.20569	0.150135	0.059266	0.0306378	0.232175		258.4	-469.977	-3339.19	-2139.67	-1077.98	-6338.11	-7012.39	5118.41	2020.49	1044.5	7915.3
	258.5	-0.0122953	-0.0982819	-0.0650283	-0.0281451	-0.185083	-0.205567	0.158054	0.0630663	0.0376951	0.219408		258.5	-419.171	-3350.62	-2216.94	-959.522	-6309.85	-7008.18	5388.37	2150.05	1285.1	7480.04
	258.6	-0.0104225	-0.0996829	-0.0659136	-0.025818	-0.183154	-0.205494	0.163986	0.0672773	0.0444308	0.206884		258.6	-355.323	-3398.38	-2247.12	-880.187	-6244.09	-7005.68	5590.6	2293.61	1514.73	7053.07
	258.7	-0.00934791	-0.101624	-0.0670214	-0.0242011	-0.180453	-0.20574	0.168097	0.0708834	0.0504488	0.194436		258.7	-318.689	-3464.58	-2284.89	-825.064	-6151.98	-7014.07	5730.76	2416.55	1719.9	6628.71
	258.8	-0.00800599	-0.103899	-0.0686985	-0.0239326	-0.177538	-0.20665	0.170476	0.0734974	0.0561184	0.182411		258.8	-272.94	-3542.12	-2342.07	-815.907	-6052.63	-7045.09	5811.86	2505.67	1913.19	6218.76
	258.9	-0.00696734	-0.10565	-0.0700801	-0.0250195	-0.173608	-0.207312	0.170457	0.0744822	0.0625481	0.17095		258.9	-237.53	-3601.81	-2389.17	-852.965	-5918.63	-7067.68	5811.2	2539.24	2132.39	5828.03
	259	-0.00523262	-0.10559	-0.0702413	-0.027913	-0.168701	-0.207464	0.168604	0.0732569	0.069204	0.159275		259	-178.39	-3599.78	-2394.66	-951.61	-5751.36	-7072.86	5748.02	2497.47	2359.3	5429.99
	259.1	-0.00264465	-0.103427	-0.0700677	-0.0305495	-0.164711	-0.206674	0.164855	0.0701829	0.0769492	0.148076		259.1	-90.1613	-3526.03	-2388.74	-1041.49	-5615.31	-7045.93	5620.24	2392.67	2623.35	5048.19
	259.2	0.000378562	-0.100461	-0.0697104	-0.0319014	-0.161221	-0.204158	0.160116	0.0662475	0.0848373	0.137459		259.2	12.9059	-3424.9	-2376.56	-1087.58	-5496.33	-6960.15	5458.67	2258.51	2892.27	4686.25
	259.3	0.00303436	-0.0976468	-0.0689918	-0.032026	-0.157278	-0.200624	0.153641	0.0617426	0.0922325	0.127006		259.3	103.447	-3328.97	-2352.06	-1091.83	-5361.91	-6839.66	5237.92	2104.93	3144.39	4329.87
	259.4	0.00636445	-0.0954521	-0.0684645	-0.0314947	-0.153507	-0.196145	0.145833	0.056998	0.0985544	0.116944		259.4	216.976	-3254.15	-2334.09	-1073.71	-5233.35	-6686.97	4971.74	1943.17	3359.91	3986.86
	259.5	0.0103079	-0.0924133	-0.0678353	-0.0319003	-0.150411	-0.19194	0.136994	0.0528223	0.10283	0.107387		259.5	351.418	-3150.55	-2312.64	-1087.54	-5127.8	-6543.6	4670.41	1800.82	3505.66	3661.04
	259.6	0.0151425	-0.0886614	-0.0673417	-0.0335846	-0.147249	-0.188315	0.127241	0.0488398	0.104976	0.0996592		259.6	516.238	-3022.64	-2295.81	-1144.97	-5020.01	-6420.03	4337.88	1665.04	3578.83	3397.58
	259.7	0.0210921	-0.0840896	-0.0668749	-0.0352893	-0.14474	-0.185169	0.116525	0.0451935	0.106632	0.0938755		259.7	719.072	-2866.78	-2279.9	-1203.08	-4934.48	-6312.76	3972.58	1540.74	3635.31	3200.4
	259.8	0.0281248	-0.0793596	-0.0663411	-0.0371501	-0.14193	-0.183135	0.104175	0.0424318	0.108877	0.0898838		259.8	958.83	-2705.52	-2261.7	-1266.52	-4838.65	-6243.42	3551.54	1446.58	3711.83	3064.31
	259.9	0.0349947	-0.0750277	-0.0661085	-0.0393511	-0.138548	-0.181413	0.090567	0.0401704	0.111832	0.0871156		259.9	1193.04	-2557.84	-2253.77	-1341.56	-4723.37	-6184.74	3087.61	1369.49	3812.59	2969.94
	260	0.0416382	-0.0711713	-0.0661827	-0.0411851	-0.133928	-0.180087	0.0765648	0.0381402	0.114648	0.0854425		260	1419.53	-2426.37	-2256.3	-1404.08	-4565.87	-6139.51	2610.24	1300.28	3908.58	2912.9
	260.1	0.0482262	-0.067714	-0.0661827	-0.0431692	-0.128021	-0.17833	0.0619704	0.0367242	0.117376	0.0840818		260.1	1644.12	-2308.5	-2256.3	-1471.72	-4364.49	-6079.62	2112.69	1252	4001.57	2866.51
	260.2	0.05299	-0.0643146	-0.0654572	-0.0454167	-0.119988	-0.175823	0.0464863	0.0353528	0.119897	0.0837574		260.2	1806.53	-2192.61	-2231.56	-1548.34	-4090.63	-5994.16	1584.81	1205.25	4087.52	2855.45
	260.3	0.0556935	-0.060045	-0.0647675	-0.0469725	-0.110384	-0.172566	0.0306844	0.0340545	0.122032	0.0844733		260.3	1898.7	-2047.05	-2208.05	-1601.38	-3763.21	-5883.13	1046.09	1160.99	4160.31	2879.86
	260.4	0.0571414	-0.0549935	-0.0631742	-0.047011	-0.0995637	-0.168816	0.0151605	0.0329863	0.124008	0.0866547		260.4	1948.06	-1874.84	-2153.73	-1602.7	-3394.32	-5755.27	516.853	1124.57	4227.66	2954.23
	260.5	0.0577145	-0.0498089	-0.0609602	-0.0444492	-0.0886114	-0.164876	0.00080707	0.0326178	0.124654	0.0902528		260.5	1967.6	-1698.08	-2078.25	-1515.36	-3020.94	-5620.95	27.5146	1112	4249.69	3076.89
	260.6	0.0580887	-0.0453014	-0.0588099	-0.0391602	-0.077696	-0.160411	-0.0124724	0.0313654	0.124074	0.0951091		260.6	1980.36	-1544.41	-2004.94	-1335.05	-2648.81	-5468.73	-425.207	1069.31	4229.91	3242.45
	260.7	0.0577463	-0.0409917	-0.0556755	-0.0329358	-0.0665688	-0.155587	-0.0243229	0.0286498	0.122336	0.10121		260.7	1968.68	-1397.49	-1898.09	-1122.85	-2269.46	-5304.27	-829.214	976.726	4170.69	3450.44
	260.8	0.0566357	-0.0357896	-0.0508533	-0.0263062	-0.0557051	-0.150366	-0.0350688	0.0249587	0.119163	0.10828		260.8	1930.82	-1220.14	-1733.69	-896.829	-1899.1	-5126.28	-1195.56	850.89	4062.49	3691.49
	260.9	0.0540504	-0.0298463	-0.0440442	-0.0184375	-0.0450768	-0.144352	-0.0443168	0.0206045	0.1154	0.116292		260.9	1842.68	-1017.52	-1501.55	-628.569	-1536.76	-4921.23	-1510.85	702.448	3934.22	3964.64
	261	0.0497865	-0.0237933	-0.0360819	-0.00913158	-0.0337934	-0.137175	-0.0512925	0.0155977	0.111439	0.12483		261	1697.32	-811.161	-1230.1	-311.313	-1152.08	-4676.57	-1748.66	531.755	3799.16	4255.69
	261.1	0.0438174	-0.0180475	-0.0267525	0.00162229	-0.0228282	-0.129008	-0.0561821	0.0105598	0.107681	0.133822		261.1	1493.82	-615.276	-912.046	55.3071	-778.258	-4398.12	-1915.36	360.003	3671.06	4562.24
	261.2	0.0363453	-0.0121552	-0.0167755	0.0147618	-0.0131762	-0.120088	-0.0589249	0.00696939	0.103157	0.142934		261.2	1239.08	-414.393	-571.909	503.258	-449.203	-4094.04	-2008.87	237.6	3516.82	4872.91
	261.3	0.0275182	-0.00530658	-0.00735238	0.0287979	-0.00534683	-0.110744	-0.0605261	0.00489205	0.0974287	0.150984		261.3	938.15	-180.911	-250.657	981.778	-182.284	-3775.49	-2063.45	166.779	3321.53	5147.35
	261.4	0.0172267	0.00179004	0.00188416	0.0431712	0.000292385	-0.101291	-0.0613748	0.00369493	0.091577	0.158188		261.4	587.292	61.0261	64.2348	1471.79	9.96796	-3453.22	-2092.39	125.967	3122.04	5392.95
	261.5	0.00551631	0.00809018	0.0112227	0.0578428	0.00353957	-0.0924897	-0.0611474	0.00356476	0.0861912	0.164811		261.5	188.062	275.81	382.602	1971.97	120.671	-3153.15	-2084.63	121.53	2938.43	5618.74
	261.6	-0.00719532	0.0129679	0.0205216	0.0722707	0.00470954	-0.0836317	-0.0597013	0.00445433	0.0818237	0.170792		261.6	-245.302	442.101	699.622	2463.85	160.557	-2851.17	-2035.33	151.857	2789.53	5822.62
	261.7	-0.020091	0.0170231	0.0293496	0.0861292	0.00406611	-0.0749559	-0.0578256	0.0071876	0.0774229	0.175437		261.7	-684.941	580.35	1000.58	2936.31	138.621	-2555.39	-1971.39	245.039	2639.5	5980.98
	261.8	-0.0324301	0.0207547	0.0380991	0.0998805	0.00233196	-0.0660968	-0.0555927	0.0111863	0.0717308	0.178023		261.8	-1105.61	707.568	1298.87	3405.12	79.5012	-2253.37	-1895.26	381.363	2445.44	6069.15
	261.9	-0.0440323	0.0250162	0.0471624	0.114055	-0.000143171	-0.0568061	-0.0538522	0.0155689	0.0658559	0.178407		261.9	-1501.15	852.852	1607.86	3888.35	-4.88098	-1936.63	-1835.93	530.774	2245.16	6082.24
	262	-0.054121	0.0298954	0.0569624	0.128493	-0.00268376	-0.0476192	-0.0524459	0.0212316	0.0596484	0.177496		262	-1845.09	1019.19	1941.96	4380.58	-91.4947	-1623.43	-1787.98	723.825	2033.53	6051.19
	262.1	-0.0637217	0.0345696	0.0676539	0.142484	-0.00455293	-0.0386845	-0.0509109	0.0277779	0.0527498	0.175366		262.1	-2172.4	1178.54	2306.45	4857.57	-155.218	-1318.83	-1735.65	947.003	1798.34	5978.58
	262.2	-0.0733632	0.0385842	0.0792273	0.156845	-0.00622251	-0.0305942	-0.0490196	0.0359918	0.0452975	0.171475		262.2	-2501.09	1315.41	2701.01	5347.16	-212.138	-1043.02	-1671.17	1227.03	1544.28	5845.93
	262.3	-0.082158	0.0403278	0.0906711	0.172529	-0.00800671	-0.0238862	-0.0467516	0.046869	0.0373615	0.166493		262.3	-2800.92	1374.85	3091.15	5881.86	-272.964	-814.327	-1593.85	1597.86	1273.73	5676.07
	262.4	-0.0902058	0.0401963	0.102719	0.188441	-0.0086941	-0.0183334	-0.0436566	0.0598432	0.0284793	0.160292		262.4	-3075.29	1370.37	3501.89	6424.31	-296.399	-625.022	-1488.34	2040.17	970.915	5464.66
	262.5	-0.097318	0.0389791	0.115941	0.204237	-0.00849926	-0.0132072	-0.0401263	0.0734472	0.0190641	0.153392		262.5	-3317.76	1328.87	3952.64	6962.84	-289.756	-450.26	-1367.98	2503.96	649.932	5229.45
	262.6	-0.102671	0.0364406	0.130387	0.219797	-0.00889505	-0.00872847	-0.0361331	0.087098	0.0100429	0.145822		262.6	-3500.26	1242.33	4445.15	7493.32	-303.25	-297.571	-1231.85	2969.34	342.382	4971.37
	262.7	-0.106301	0.0328515	0.145878	0.235254	-0.00987096	-0.00493515	-0.0317918	0.100347	0.00161267	0.13741		262.7	-3624	1119.97	4973.26	8020.28	-336.52	-168.249	-1083.84	3421.02	54.979	4684.58
	262.8	-0.108557	0.0273582	0.161766	0.250642	-0.0112392	-0.00166141	-0.0272881	0.112248	-0.00684801	0.128047		262.8	-3700.91	932.694	5514.91	8544.87	-383.167	-56.6409	-930.304	3826.75	-233.462	4365.36
	262.9	-0.108955	0.0208137	0.177935	0.26606	-0.0134103	0.0015398	-0.0227263	0.12307	-0.0141276	0.117308		262.9	-3714.49	709.579	6066.16	9070.51	-457.184	52.4947	-774.784	4195.7	-481.637	3999.25
	263	-0.10776	0.013972	0.193162	0.280148	-0.0159646	0.00391474	-0.0173776	0.132275	-0.0215219	0.104454		263	-3673.74	476.333	6585.28	9550.79	-544.263	133.461	-592.436	4509.53	-733.724	3561.04
	263.1	-0.105429	0.00631021	0.207056	0.292356	-0.0193627	0.00627643	-0.0113265	0.138766	-0.0292596	0.0898535		263.1	-3594.27	215.127	7058.94	9966.98	-660.114	213.976	-386.144	4730.81	-997.515	3063.28
	263.2	-0.101495	-0.00267242	0.220247	0.303483	-0.0235647	0.00864045	-0.00472998	0.142627	-0.0375961	0.0737965		263.2	-3460.17	-91.1079	7508.66	10346.3	-803.368	294.57	-161.254	4862.42	-1281.72	2515.87
	263.3	-0.0967283	-0.0123851	0.231946	0.312836	-0.0289765	0.0106036	0.0016051	0.14473	-0.0463764	0.0566132		263.3	-3297.66	-422.232	7907.5	10665.2	-987.865	361.498	54.7209	4934.12	-1581.06	1930.05
	263.4	-0.0917808	-0.022132	0.242497	0.320202	-0.0351698	0.0118375	0.00759593	0.144902	-0.0548944	0.0384647		263.4	-3128.99	-754.521	8267.21	10916.3	-1199.01	403.562	258.96	4939.99	-1871.46	1311.34
	263.5	-0.085218	-0.0318442	0.250019	0.326043	-0.0431326	0.0113137	0.0138024	0.143162	-0.0629873	0.0201728		263.5	-2905.25	-1085.63	8523.65	11115.4	-1470.47	385.707	470.55	4880.66	-2147.36	687.729
	263.6	-0.0769109	-0.041754	0.254625	0.330669	-0.0524072	0.00868351	0.0196315	0.140401	-0.0714198	0.00227773		263.6	-2622.04	-1423.48	8680.65	11273.1	-1786.66	296.038	669.277	4786.53	-2434.84	77.6522
	263.7	-0.0675218	-0.0512492	0.255884	0.333833	-0.0630938	0.00451496	0.0246972	0.136985	-0.0802315	-0.016286		263.7	-2301.95	-1747.18	8723.59	11381	-2150.99	153.924	841.977	4670.08	-2735.25	-555.221
	263.8	-0.0570352	-0.0605644	0.254219	0.334364	-0.0748213	-0.000696077	0.0293937	0.132627	-0.0876166	-0.0360459		263.8	-1944.44	-2064.76	8666.81	11399.1	-2550.8	-23.7306	1002.09	4521.5	-2987.02	-1228.88
	263.9	-0.0465891	-0.0694527	0.250624	0.332117	-0.0870364	-0.00711336	0.0336859	0.127628	-0.0924553	-0.0564502		263.9	-1588.31	-2367.78	8544.26	11322.5	-2967.24	-242.508	1148.42	4351.1	-3151.98	-1924.5
	264	-0.0351135	-0.0774091	0.244648	0.328635	-0.0993486	-0.0146166	0.0368395	0.121986	-0.0953688	-0.07749		264	-1197.09	-2639.03	8340.52	11203.8	-3386.99	-498.309	1255.93	4158.73	-3251.31	-2641.79
	264.1	-0.0231215	-0.085676	0.236195	0.324169	-0.111307	-0.0222212	0.0383569	0.115291	-0.096455	-0.098171		264.1	-788.256	-2920.86	8052.36	11051.5	-3794.66	-757.563	1307.66	3930.48	-3288.34	-3346.84
	264.2	-0.0112343	-0.0943307	0.226045	0.317329	-0.122817	-0.0297724	0.0382515	0.108343	-0.0969652	-0.119422		264.2	-382.999	-3215.92	7706.32	10818.4	-4187.07	-1015	1304.07	3693.61	-3305.73	-4071.32
	264.3	0.000837458	-0.103314	0.214835	0.307368	-0.13436	-0.0376536	0.0365919	0.100627	-0.0964352	-0.140795		264.3	28.5506	-3522.18	7324.14	10478.8	-4580.58	-1283.69	1247.49	3430.58	-3287.66	-4799.97
	264.4	0.013446	-0.111279	0.202639	0.294577	-0.146096	-0.0458269	0.0340278	0.0927313	-0.0957713	-0.161338		264.4	458.401	-3793.71	6908.36	10042.7	-4980.68	-1562.33	1160.08	3161.39	-3265.03	-5500.34
	264.5	0.0254832	-0.117177	0.189304	0.279211	-0.157098	-0.0551128	0.03006	0.0837684	-0.0946928	-0.181294		264.5	868.77	-3994.8	6453.76	9518.85	-5355.79	-1878.9	1024.8	2855.83	-3228.26	-6180.68
	264.6	0.0373122	-0.122605	0.17542	0.262426	-0.166525	-0.0647977	0.0247753	0.0730725	-0.0922805	-0.200242		264.6	1272.04	-4179.85	5980.4	8946.62	-5677.16	-2209.08	844.638	2491.18	-3146.02	-6826.64
	264.7	0.0481108	-0.128531	0.16104	0.245687	-0.174451	-0.0739089	0.0186229	0.0607711	-0.0882828	-0.218282		264.7	1640.19	-4381.88	5490.18	8375.93	-5947.36	-2519.7	634.89	2071.81	-3009.73	-7441.67
	264.8	0.0581194	-0.134059	0.145841	0.228794	-0.179838	-0.0831179	0.0113852	0.0472536	-0.0836343	-0.235428		264.8	1981.4	-4570.33	4972	7800.04	-6131.02	-2833.65	388.145	1610.97	-2851.25	-8026.19
	264.9	0.0672691	-0.138478	0.128709	0.211564	-0.183209	-0.0919502	0.00343835	0.0317829	-0.079341	-0.251366		264.9	2293.33	-4721	4387.95	7212.61	-6245.94	-3134.76	117.22	1083.54	-2704.89	-8569.55
	265	0.0751841	-0.142057	0.109901	0.195305	-0.18449	-0.100757	-0.0047325	0.0143686	-0.0760632	-0.265999		265	2563.17	-4843	3746.73	6658.34	-6289.61	-3434.99	-161.34	489.854	-2593.14	-9068.41
	265.1	0.0814565	-0.144984	0.0897582	0.179985	-0.184334	-0.109514	-0.0132388	-0.0043301	-0.0730225	-0.279013		265.1	2777.01	-4942.78	3060.03	6136.05	-6284.29	-3733.56	-451.336	-147.621	-2489.48	-9512.11
	265.2	0.0853972	-0.14706	0.06822	0.165828	-0.182955	-0.118425	-0.0208478	-0.0232967	-0.0704893	-0.289173		265.2	2911.36	-5013.57	2325.75	5653.41	-6237.28	-4037.33	-710.744	-794.229	-2403.12	-9858.48
	265.3	0.0879187	-0.148333	0.0450201	0.152303	-0.181099	-0.127488	-0.0274841	-0.0422297	-0.0689082	-0.296647		265.3	2997.32	-5056.95	1534.82	5192.31	-6174.01	-4346.32	-936.986	-1439.69	-2349.22	-10113.3
	265.4	0.0893147	-0.14925	0.0204748	0.139969	-0.17924	-0.136066	-0.0333056	-0.0612808	-0.0679261	-0.301964		265.4	3044.91	-5088.23	698.025	4771.8	-6110.64	-4638.77	-1135.45	-2089.18	-2315.73	-10294.5
	265.5	0.0906682	-0.149672	-0.00591892	0.128622	-0.177965	-0.144426	-0.0386691	-0.0800671	-0.0679494	-0.305328		265.5	3091.06	-5102.61	-201.787	4384.97	-6067.17	-4923.77	-1318.31	-2729.65	-2316.53	-10409.2
	265.6	0.0916991	-0.148951	-0.0338909	0.116685	-0.176648	-0.152386	-0.0436082	-0.0990648	-0.0682882	-0.307683		265.6	3126.2	-5078.04	-1155.41	3978.02	-6022.28	-5195.12	-1486.69	-3377.31	-2328.08	-10489.5
	265.7	0.0912933	-0.147511	-0.0627735	0.104488	-0.175533	-0.159213	-0.0482698	-0.117577	-0.069248	-0.308913		265.7	3112.37	-5028.94	-2140.07	3562.19	-5984.25	-5427.87	-1645.61	-4008.44	-2360.8	-10531.4
	265.8	0.0899865	-0.1463	-0.0929403	0.0920091	-0.174254	-0.165059	-0.0525734	-0.13518	-0.0702461	-0.309789		265.8	3067.82	-4987.66	-3168.52	3136.77	-5940.66	-5627.19	-1792.33	-4608.55	-2394.83	-10561.3
	265.9	0.0873594	-0.145281	-0.124178	0.0785627	-0.172778	-0.16969	-0.0561717	-0.151812	-0.0713942	-0.309816		265.9	2978.25	-4952.92	-4233.46	2678.35	-5890.35	-5785.08	-1915	-5175.55	-2433.97	-10562.2
	266	0.0837194	-0.144043	-0.155902	0.0645868	-0.171072	-0.173175	-0.0597487	-0.166501	-0.0732553	-0.309113		266	2854.16	-4910.71	-5315.01	2201.89	-5832.17	-5903.88	-2036.95	-5676.35	-2497.42	-10538.3
	266.1	0.0793151	-0.14241	-0.187713	0.0498698	-0.169314	-0.175671	-0.0633843	-0.178628	-0.0751778	-0.307686		266.1	2704.01	-4855.05	-6399.51	1700.16	-5772.24	-5988.97	-2160.89	-6089.78	-2562.96	-10489.6
	266.2	0.0746311	-0.140385	-0.218525	0.0347808	-0.166971	-0.17695	-0.0670798	-0.188493	-0.0774955	-0.305597		266.2	2544.32	-4786	-7449.95	1185.75	-5692.38	-6032.57	-2286.88	-6426.11	-2641.97	-10418.4
	266.3	0.0689804	-0.139024	-0.247505	0.0186676	-0.163982	-0.177059	-0.071409	-0.196705	-0.0798885	-0.302163		266.3	2351.67	-4739.58	-8437.92	636.416	-5590.48	-6036.28	-2434.47	-6706.07	-2723.56	-10301.3
	266.4	0.0627263	-0.138628	-0.273966	0.00212754	-0.160681	-0.175978	-0.0762162	-0.203493	-0.0828104	-0.296709		266.4	2138.46	-4726.11	-9340.04	72.532	-5477.94	-5999.44	-2598.36	-6937.49	-2823.17	-10115.4
	266.5	0.0563932	-0.138398	-0.298235	-0.0143159	-0.156774	-0.173489	-0.0811855	-0.208567	-0.0862486	-0.289505		266.5	1922.55	-4718.25	-10167.4	-488.056	-5344.72	-5914.56	-2767.77	-7110.45	-2940.38	-9869.79
	266.6	0.0503317	-0.137882	-0.320009	-0.0301702	-0.152728	-0.169806	-0.0861645	-0.212277	-0.0899812	-0.281479		266.6	1715.91	-4700.66	-10909.7	-1028.56	-5206.8	-5789.02	-2937.52	-7236.95	-3067.63	-9596.18
	266.7	0.0448664	-0.137189	-0.33854	-0.0449116	-0.148955	-0.165119	-0.0909935	-0.214158	-0.0941255	-0.272624		266.7	1529.58	-4677.04	-11541.5	-1531.12	-5078.16	-5629.23	-3102.15	-7301.06	-3208.92	-9294.29
	266.8	0.0395467	-0.136331	-0.353368	-0.0584273	-0.144945	-0.158878	-0.0953841	-0.214049	-0.0992196	-0.262519		266.8	1348.22	-4647.8	-12047	-1991.9	-4941.45	-5416.45	-3251.83	-7297.34	-3382.59	-8949.8
	266.9	0.0343365	-0.135356	-0.365065	-0.0713464	-0.140362	-0.151394	-0.0989984	-0.212054	-0.104436	-0.250715		266.9	1170.6	-4614.54	-12445.8	-2432.34	-4785.21	-5161.33	-3375.05	-7229.34	-3560.41	-8547.36
	267	0.0296706	-0.135234	-0.373477	-0.0845135	-0.135261	-0.14272	-0.101417	-0.208594	-0.109606	-0.237335		267	1011.53	-4610.38	-12732.6	-2881.23	-4611.31	-4865.61	-3457.49	-7111.37	-3736.7	-8091.2
	267.1	0.0255374	-0.136369	-0.379151	-0.0978581	-0.129731	-0.133143	-0.103171	-0.204008	-0.114713	-0.22236		267.1	870.618	-4649.09	-12926	-3336.17	-4422.78	-4539.09	-3517.31	-6955.03	-3910.8	-7580.68
	267.2	0.0221223	-0.138017	-0.382722	-0.109607	-0.124407	-0.123321	-0.10507	-0.198677	-0.120436	-0.206723		267.2	754.192	-4705.26	-13047.7	-3736.72	-4241.27	-4204.25	-3582.04	-6773.3	-4105.89	-7047.58
	267.3	0.0193205	-0.140524	-0.384787	-0.120449	-0.119722	-0.112595	-0.106507	-0.193302	-0.127311	-0.191046		267.3	658.672	-4790.73	-13118.1	-4106.35	-4081.55	-3838.58	-3631.04	-6590.04	-4340.29	-6513.12
	267.4	0.0168633	-0.142996	-0.38419	-0.130374	-0.116456	-0.101238	-0.107073	-0.187873	-0.135634	-0.175474		267.4	574.902	-4875	-13097.8	-4444.69	-3970.22	-3451.4	-3650.32	-6404.96	-4624.04	-5982.25
	267.5	0.0158995	-0.145575	-0.381919	-0.138551	-0.114414	-0.0892792	-0.107061	-0.182451	-0.1443	-0.15933		267.5	542.044	-4962.94	-13020.4	-4723.47	-3900.59	-3043.7	-3649.9	-6220.12	-4919.46	-5431.87
	267.6	0.0147516	-0.147156	-0.382557	-0.144511	-0.11216	-0.0795819	-0.106398	-0.177646	-0.152566	-0.145994		267.6	502.912	-5016.84	-13042.1	-4926.66	-3823.77	-2713.1	-3627.33	-6056.3	-5201.28	-4977.23
	267.7	0.0142013	-0.151114	-0.378313	-0.1465	-0.106652	-0.0674199	-0.104546	-0.170322	-0.164411	-0.129748		267.7	484.15	-5151.78	-12897.4	-4994.47	-3635.99	-2298.48	-3564.17	-5806.61	-5605.09	-4423.37
	267.8	0.0152526	-0.155705	-0.374615	-0.147918	-0.10248	-0.0537892	-0.101205	-0.162784	-0.177685	-0.113932		267.8	519.989	-5308.27	-12771.4	-5042.83	-3493.73	-1833.78	-3450.27	-5549.63	-6057.64	-3884.18
	267.9	0.0172138	-0.159836	-0.371704	-0.149576	-0.101749	-0.0398341	-0.0964402	-0.155594	-0.193152	-0.0965276		267.9	586.851	-5449.11	-12672.1	-5099.34	-3468.81	-1358.02	-3287.83	-5304.5	-6584.92	-3290.82
	268	0.0223999	-0.161838	-0.369338	-0.152897	-0.105325	-0.0276195	-0.0906771	-0.144662	-0.207978	-0.0789171		268	763.655	-5517.36	-12591.4	-5212.57	-3590.72	-941.601	-3091.36	-4931.8	-7090.38	-2690.44
	268.1	0.0317423	-0.16544	-0.367437	-0.158043	-0.112892	-0.0169453	-0.0842956	-0.128543	-0.221497	-0.0618948		268.1	1082.16	-5640.18	-12526.7	-5388.01	-3848.72	-577.7	-2873.8	-4382.28	-7551.26	-2110.11
	268.2	0.0420697	-0.170546	-0.363743	-0.167457	-0.120873	-0.00468486	-0.0789087	-0.111534	-0.230984	-0.0489518		268.2	1434.24	-5814.25	-12400.7	-5708.93	-4120.81	-159.716	-2690.15	-3802.4	-7874.69	-1668.86
	268.3	0.0531518	-0.175081	-0.351972	-0.177392	-0.128932	0.0113768	-0.0757961	-0.0983765	-0.235857	-0.0374485		268.3	1812.05	-5968.85	-11999.4	-6047.64	-4395.55	387.858	-2584.04	-3353.85	-8040.83	-1276.69
	268.4	0.0635771	-0.181231	-0.331831	-0.189346	-0.141196	0.0321687	-0.0746477	-0.0886865	-0.239782	-0.0276344		268.4	2167.47	-6178.51	-11312.8	-6455.16	-4813.63	1096.69	-2544.88	-3023.5	-8174.63	-942.111
	268.5	0.0720726	-0.187322	-0.306662	-0.202638	-0.156582	0.0521555	-0.0744706	-0.08174	-0.243194	-0.0154096		268.5	2457.09	-6386.19	-10454.7	-6908.31	-5338.2	1778.08	-2538.85	-2786.68	-8290.94	-525.345
	268.6	0.0767259	-0.193826	-0.280014	-0.214236	-0.171381	0.0703081	-0.074099	-0.0782052	-0.244107	-0.000411809		268.6	2615.73	-6607.89	-9546.21	-7303.72	-5842.72	2396.94	-2526.18	-2666.17	-8322.07	-14.0394
	268.7	0.0822323	-0.199809	-0.254683	-0.221471	-0.18541	0.08629	-0.0718363	-0.0777003	-0.244065	0.0153619		268.7	2803.46	-6811.86	-8682.64	-7550.37	-6321	2941.79	-2449.04	-2648.95	-8320.65	523.716
	268.8	0.0902677	-0.205023	-0.233802	-0.223261	-0.198152	0.0961773	-0.0678751	-0.0769102	-0.245052	0.0302313		268.8	3077.4	-6989.64	-7970.78	-7611.41	-6755.38	3278.87	-2313.99	-2622.02	-8354.29	1030.65
	268.9	0.0972271	-0.209031	-0.218407	-0.218876	-0.208496	0.101703	-0.0614419	-0.0726294	-0.246087	0.0457294		268.9	3314.66	-7126.26	-7445.92	-7461.9	-7108.02	3467.27	-2094.67	-2476.08	-8389.6	1559.01
	269	0.105372	-0.206639	-0.206758	-0.210438	-0.220024	0.107165	-0.0573047	-0.0744112	-0.252057	0.0588589		269	3592.33	-7044.72	-7048.78	-7174.25	-7501.04	3653.45	-1953.63	-2536.82	-8593.13	2006.61
	269.1	0.113489	-0.200896	-0.19945	-0.200617	-0.233405	0.115973	-0.0524331	-0.0813083	-0.264361	0.0677348		269.1	3869.05	-6848.95	-6799.63	-6839.43	-7957.24	3953.76	-1787.55	-2771.96	-9012.59	2309.21
	269.2	0.11879	-0.198561	-0.196795	-0.191154	-0.245751	0.131316	-0.0476505	-0.0887387	-0.280155	0.0724471		269.2	4049.79	-6769.33	-6709.14	-6516.8	-8378.14	4476.84	-1624.5	-3025.27	-9551.03	2469.86
	269.3	0.123469	-0.194135	-0.204037	-0.183916	-0.252606	0.143995	-0.0450058	-0.0941176	-0.29953	0.0746498		269.3	4209.31	-6618.43	-6956	-6270.05	-8611.82	4909.08	-1534.34	-3208.65	-10211.6	2544.96
	269.4	0.125498	-0.184965	-0.218731	-0.175376	-0.252147	0.153457	-0.0444076	-0.0976499	-0.313367	0.0730311		269.4	4278.47	-6305.81	-7456.96	-5978.9	-8596.19	5231.64	-1513.94	-3329.07	-10683.3	2489.77
	269.5	0.12761	-0.178283	-0.232686	-0.16447	-0.255182	0.160967	-0.0515117	-0.0997268	-0.326661	0.0695733		269.5	4350.48	-6078.02	-7932.74	-5607.09	-8699.67	5487.68	-1756.14	-3399.88	-11136.5	2371.89
	269.6	0.132685	-0.170331	-0.246533	-0.144228	-0.270853	0.155827	-0.0552536	-0.0946432	-0.335814	0.0564371		269.6	4523.51	-5806.9	-8404.81	-4917.01	-9233.92	5312.45	-1883.7	-3226.57	-11448.5	1924.05
	269.7	0.130635	-0.164248	-0.256696	-0.119088	-0.289737	0.141495	-0.0459378	-0.0817405	-0.345677	0.0441925		269.7	4453.61	-5599.54	-8751.25	-4059.96	-9877.72	4823.85	-1566.11	-2786.69	-11784.8	1506.61
	269.8	0.130641	-0.157276	-0.271759	-0.109009	-0.297635	0.134986	-0.0266792	-0.0722692	-0.357823	0.0382718		269.8	4453.81	-5361.84	-9264.8	-3716.34	-10147	4601.92	-909.545	-2463.8	-12198.9	1304.76
	269.9	0.149656	-0.151975	-0.276208	-0.102623	-0.291237	0.132448	-0.00590724	-0.0576641	-0.358529	0.0490895		269.9	5102.07	-5181.14	-9416.48	-3498.63	-9928.82	4515.43	-201.389	-1965.88	-12223	1673.56
	270	0.152129	-0.155624	-0.266808	-0.0958157	-0.290259	0.137857	0.013653	-0.0383434	-0.361488	0.0399239		270	5186.39	-5305.54	-9096.02	-3266.54	-9895.5	4699.8	465.459	-1307.2	-12323.8	1361.08

## Sheet: 1a
T (oC )	mdeg	θ/pTrp	T (K)	θ - θcoil(95)		c	2.9e-05	M		Results from OriginPro					T (oC )	T (K)	DGfit	DHfit	TDSfit	Keq	cF	F(T)
0	22.3483	385316	273.15	376673		l	0.1	cm			Fitted Values		Standard Error		0	273.15	-1490.15	-1573.57	-83.4259	15.5732	0.939662	336984
0.1	21.5048	370772	273.25	362129						θmax	358623		0		0.1	273.25	-1490.11	-1605.75	-115.638	15.5565	0.939601	336962
0.2	21.2296	366028	273.35	357385						θmin	0		0		0.2	273.35	-1490.06	-1637.92	-147.862	15.5396	0.939539	336940
0.3	21.173	365052	273.45	356409		θcoil(95)	8643			Tm	324.689	K	0.06464		0.3	273.45	-1490	-1670.1	-180.097	15.5223	0.939476	336917
0.4	21.0846	363527	273.55	354884						DHm	-18156.4	cal/mol	92.9268		0.4	273.55	-1489.93	-1702.27	-212.344	15.5047	0.939411	336894
0.5	21.0811	363467	273.65	354824		%fold 291K	0.904086			DCp	-321.755	cal/(deg.mol)	5.9983		0.5	273.65	-1489.85	-1734.45	-244.603	15.4868	0.939345	336870
0.6	21.0852	363538	273.75	354895		%fold 310K	0.758906			DHo	-9569.18	cal/mol	118.83		0.6	273.75	-1489.75	-1766.63	-276.874	15.4686	0.939278	336846
0.7	21.043	362810	273.85	354167						DSo	-28.3214	cal/mol	0.38979		0.7	273.85	-1489.64	-1798.8	-309.156	15.4501	0.93921	336822
0.8	21.0081	362208	273.95	353565						DGo	-1129.41	cal/mol	5.37401		0.8	273.95	-1489.53	-1830.98	-341.451	15.4313	0.93914	336797
0.9	21.0625	363146	274.05	354503						TDSo	-8439.77	cal/mol	116.158		0.9	274.05	-1489.4	-1863.15	-373.757	15.4122	0.93907	336772
1	21.0546	363011	274.15	354368						cF(18 oC)	0.90409		0.00109		1	274.15	-1489.25	-1895.33	-406.074	15.3928	0.938998	336746
1.1	21.0959	363722	274.25	355079								Tm	51.5388		1.1	274.25	-1489.1	-1927.5	-438.404	15.3731	0.938924	336719
1.2	21.0704	363282	274.35	354639						R2	0.9964				1.2	274.35	-1488.93	-1959.68	-470.745	15.3531	0.93885	336693
1.3	21.0411	362777	274.45	354134						RMSD	7798.55	SE	252.885		1.3	274.45	-1488.76	-1991.85	-503.098	15.3329	0.938774	336665
1.4	21.0194	362404	274.55	353761											1.4	274.55	-1488.57	-2024.03	-535.463	15.3123	0.938697	336638
1.5	20.9998	362066	274.65	353423											1.5	274.65	-1488.37	-2056.2	-567.839	15.2915	0.938618	336610
1.6	20.9951	361984	274.75	353341											1.6	274.75	-1488.15	-2088.38	-600.227	15.2704	0.938539	336581
1.7	21.0223	362453	274.85	353810											1.7	274.85	-1487.93	-2120.56	-632.627	15.249	0.938458	336552
1.8	20.9969	362016	274.95	353373											1.8	274.95	-1487.69	-2152.73	-665.038	15.2273	0.938375	336523
1.9	20.9891	361881	275.05	353238											1.9	275.05	-1487.44	-2184.91	-697.462	15.2053	0.938292	336493
2	20.9676	361511	275.15	352868											2	275.15	-1487.19	-2217.08	-729.897	15.1831	0.938207	336462
2.1	20.9056	360441	275.25	351798											2.1	275.25	-1486.91	-2249.26	-762.343	15.1606	0.938121	336431
2.2	20.9007	360357	275.35	351714											2.2	275.35	-1486.63	-2281.43	-794.801	15.1378	0.938034	336400
2.3	20.893	360224	275.45	351581											2.3	275.45	-1486.34	-2313.61	-827.271	15.1147	0.937945	336368
2.4	20.9014	360370	275.55	351727											2.4	275.55	-1486.03	-2345.78	-859.753	15.0914	0.937855	336336
2.5	20.8661	359761	275.65	351118											2.5	275.65	-1485.71	-2377.96	-892.246	15.0678	0.937764	336303
2.6	20.8576	359615	275.75	350972											2.6	275.75	-1485.38	-2410.14	-924.751	15.0439	0.937671	336270
2.7	20.8336	359201	275.85	350558											2.7	275.85	-1485.04	-2442.31	-957.268	15.0198	0.937577	336236
2.8	20.8055	358716	275.95	350073											2.8	275.95	-1484.69	-2474.49	-989.796	14.9954	0.937482	336202
2.9	20.788	358414	276.05	349771											2.9	276.05	-1484.33	-2506.66	-1022.34	14.9707	0.937385	336168
3	20.7854	358368	276.15	349725											3	276.15	-1483.95	-2538.84	-1054.89	14.9458	0.937288	336133
3.1	20.7613	357954	276.25	349311											3.1	276.25	-1483.56	-2571.01	-1087.45	14.9207	0.937188	336097
3.2	20.7678	358065	276.35	349422											3.2	276.35	-1483.16	-2603.19	-1120.03	14.8952	0.937088	336061
3.3	20.7566	357872	276.45	349229											3.3	276.45	-1482.75	-2635.36	-1152.61	14.8695	0.936986	336024
3.4	20.7355	357509	276.55	348866											3.4	276.55	-1482.33	-2667.54	-1185.21	14.8436	0.936883	335987
3.5	20.7183	357212	276.65	348569											3.5	276.65	-1481.89	-2699.71	-1217.82	14.8174	0.936779	335950
3.6	20.6964	356834	276.75	348191											3.6	276.75	-1481.45	-2731.89	-1250.44	14.791	0.936673	335912
3.7	20.6829	356603	276.85	347960											3.7	276.85	-1480.99	-2764.07	-1283.08	14.7643	0.936566	335874
3.8	20.6635	356268	276.95	347625											3.8	276.95	-1480.52	-2796.24	-1315.72	14.7374	0.936457	335835
3.9	20.6652	356297	277.05	347654											3.9	277.05	-1480.04	-2828.42	-1348.38	14.7103	0.936347	335795
4	20.6584	356179	277.15	347536											4	277.15	-1479.55	-2860.59	-1381.04	14.6829	0.936236	335755
4.1	20.6487	356013	277.25	347370											4.1	277.25	-1479.04	-2892.77	-1413.72	14.6552	0.936124	335715
4.2	20.6364	355800	277.35	347157											4.2	277.35	-1478.53	-2924.94	-1446.42	14.6273	0.93601	335674
4.3	20.6234	355576	277.45	346933											4.3	277.45	-1478	-2957.12	-1479.12	14.5992	0.935894	335633
4.4	20.6012	355193	277.55	346550											4.4	277.55	-1477.46	-2989.29	-1511.83	14.5709	0.935778	335591
4.5	20.5771	354778	277.65	346135											4.5	277.65	-1476.91	-3021.47	-1544.56	14.5423	0.93566	335549
4.6	20.5725	354699	277.75	346056											4.6	277.75	-1476.35	-3053.64	-1577.3	14.5135	0.93554	335506
4.7	20.567	354604	277.85	345961											4.7	277.85	-1475.77	-3085.82	-1610.05	14.4845	0.935419	335462
4.8	20.5506	354321	277.95	345678											4.8	277.95	-1475.19	-3118	-1642.81	14.4552	0.935297	335419
4.9	20.5248	353876	278.05	345233											4.9	278.05	-1474.59	-3150.17	-1675.58	14.4258	0.935173	335374
5	20.5073	353574	278.15	344931											5	278.15	-1473.98	-3182.35	-1708.36	14.3961	0.935048	335329
5.1	20.491	353293	278.25	344650											5.1	278.25	-1473.36	-3214.52	-1741.16	14.3662	0.934922	335284
5.2	20.4764	353042	278.35	344399											5.2	278.35	-1472.73	-3246.7	-1773.96	14.336	0.934794	335238
5.3	20.4669	352878	278.45	344235											5.3	278.45	-1472.09	-3278.87	-1806.78	14.3057	0.934665	335192
5.4	20.45	352586	278.55	343943											5.4	278.55	-1471.43	-3311.05	-1839.61	14.2752	0.934534	335145
5.5	20.4389	352395	278.65	343752											5.5	278.65	-1470.77	-3343.22	-1872.46	14.2444	0.934402	335098
5.6	20.4302	352244	278.75	343601											5.6	278.75	-1470.09	-3375.4	-1905.31	14.2134	0.934269	335050
5.7	20.4171	352019	278.85	343376											5.7	278.85	-1469.4	-3407.58	-1938.17	14.1822	0.934134	335001
5.8	20.4079	351861	278.95	343218											5.8	278.95	-1468.7	-3439.75	-1971.05	14.1509	0.933997	334952
5.9	20.3894	351542	279.05	342899											5.9	279.05	-1467.99	-3471.93	-2003.94	14.1193	0.933859	334903
6	20.3751	351294	279.15	342651											6	279.15	-1467.26	-3504.1	-2036.84	14.0875	0.93372	334853
6.1	20.3665	351147	279.25	342504											6.1	279.25	-1466.53	-3536.28	-2069.75	14.0555	0.933579	334803
6.2	20.3541	350933	279.35	342290											6.2	279.35	-1465.78	-3568.45	-2102.67	14.0233	0.933437	334752
6.3	20.34	350690	279.45	342047											6.3	279.45	-1465.02	-3600.63	-2135.6	13.991	0.933293	334700
6.4	20.3367	350633	279.55	341990											6.4	279.55	-1464.25	-3632.8	-2168.55	13.9584	0.933148	334648
6.5	20.3198	350342	279.65	341699											6.5	279.65	-1463.47	-3664.98	-2201.51	13.9257	0.933001	334595
6.6	20.3122	350211	279.75	341568											6.6	279.75	-1462.68	-3697.15	-2234.48	13.8927	0.932853	334542
6.7	20.2957	349926	279.85	341283											6.7	279.85	-1461.87	-3729.33	-2267.46	13.8596	0.932703	334489
6.8	20.2799	349653	279.95	341010											6.8	279.95	-1461.06	-3761.51	-2300.45	13.8263	0.932552	334434
6.9	20.2693	349470	280.05	340827											6.9	280.05	-1460.23	-3793.68	-2333.45	13.7928	0.9324	334380
7	20.2492	349124	280.15	340482											7	280.15	-1459.39	-3825.86	-2366.46	13.7591	0.932245	334324
7.1	20.2387	348944	280.25	340301											7.1	280.25	-1458.54	-3858.03	-2399.49	13.7253	0.93209	334268
7.2	20.2143	348522	280.35	339879											7.2	280.35	-1457.68	-3890.21	-2432.53	13.6913	0.931932	334212
7.3	20.1994	348265	280.45	339622											7.3	280.45	-1456.81	-3922.38	-2465.58	13.6571	0.931774	334155
7.4	20.1897	348098	280.55	339455											7.4	280.55	-1455.92	-3954.56	-2498.64	13.6227	0.931613	334098
7.5	20.1697	347753	280.65	339110											7.5	280.65	-1455.03	-3986.73	-2531.71	13.5882	0.931451	334040
7.6	20.1589	347566	280.75	338923											7.6	280.75	-1454.12	-4018.91	-2564.79	13.5535	0.931288	333981
7.7	20.1469	347361	280.85	338718											7.7	280.85	-1453.2	-4051.08	-2597.89	13.5186	0.931123	333922
7.8	20.1332	347124	280.95	338481											7.8	280.95	-1452.27	-4083.26	-2630.99	13.4836	0.930956	333862
7.9	20.1154	346818	281.05	338175											7.9	281.05	-1451.33	-4115.44	-2664.11	13.4484	0.930788	333802
8	20.104	346621	281.15	337978											8	281.15	-1450.37	-4147.61	-2697.24	13.4131	0.930619	333741
8.1	20.0938	346446	281.25	337803											8.1	281.25	-1449.41	-4179.79	-2730.38	13.3776	0.930447	333679
8.2	20.0779	346170	281.35	337527											8.2	281.35	-1448.43	-4211.96	-2763.53	13.3419	0.930274	333617
8.3	20.0684	346006	281.45	337363											8.3	281.45	-1447.44	-4244.14	-2796.7	13.3061	0.9301	333555
8.4	20.0563	345798	281.55	337155											8.4	281.55	-1446.44	-4276.31	-2829.87	13.2702	0.929924	333492
8.5	20.0414	345541	281.65	336898											8.5	281.65	-1445.43	-4308.49	-2863.06	13.2341	0.929746	333428
8.6	20.0276	345303	281.75	336660											8.6	281.75	-1444.41	-4340.66	-2896.25	13.1978	0.929567	333364
8.7	20.0118	345031	281.85	336388											8.7	281.85	-1443.38	-4372.84	-2929.46	13.1614	0.929386	333299
8.8	20.0061	344932	281.95	336289											8.8	281.95	-1442.33	-4405.02	-2962.68	13.1249	0.929203	333233
8.9	19.9983	344799	282.05	336156											8.9	282.05	-1441.27	-4437.19	-2995.92	13.0882	0.929019	333167
9	19.9853	344574	282.15	335931											9	282.15	-1440.21	-4469.37	-3029.16	13.0514	0.928833	333100
9.1	19.9791	344467	282.25	335824											9.1	282.25	-1439.13	-4501.54	-3062.41	13.0145	0.928645	333033
9.2	19.9688	344289	282.35	335646											9.2	282.35	-1438.04	-4533.72	-3095.68	12.9774	0.928456	332965
9.3	19.9669	344258	282.45	335615											9.3	282.45	-1436.93	-4565.89	-3128.96	12.9402	0.928265	332897
9.4	19.9557	344063	282.55	335420											9.4	282.55	-1435.82	-4598.07	-3162.25	12.9029	0.928072	332828
9.5	19.9455	343888	282.65	335245											9.5	282.65	-1434.7	-4630.24	-3195.55	12.8654	0.927878	332758
9.6	19.9268	343565	282.75	334922											9.6	282.75	-1433.56	-4662.42	-3228.86	12.8278	0.927682	332688
9.7	19.9081	343244	282.85	334601											9.7	282.85	-1432.41	-4694.59	-3262.18	12.7901	0.927484	332617
9.8	19.9003	343109	282.95	334466											9.8	282.95	-1431.25	-4726.77	-3295.52	12.7523	0.927285	332545
9.9	19.9032	343159	283.05	334516											9.9	283.05	-1430.08	-4758.95	-3328.86	12.7143	0.927084	332473
10	19.8911	342949	283.15	334306											10	283.15	-1428.9	-4791.12	-3362.22	12.6763	0.926881	332400
10.1	19.8748	342669	283.25	334026											10.1	283.25	-1427.71	-4823.3	-3395.59	12.6381	0.926676	332327
10.2	19.8613	342437	283.35	333794											10.2	283.35	-1426.5	-4855.47	-3428.97	12.5998	0.926469	332253
10.3	19.8479	342205	283.45	333562											10.3	283.45	-1425.29	-4887.65	-3462.36	12.5614	0.926261	332178
10.4	19.8481	342208	283.55	333565											10.4	283.55	-1424.06	-4919.82	-3495.76	12.5229	0.926051	332103
10.5	19.8371	342019	283.65	333376											10.5	283.65	-1422.82	-4952	-3529.18	12.4843	0.925839	332027
10.6	19.8265	341835	283.75	333192											10.6	283.75	-1421.57	-4984.17	-3562.6	12.4455	0.925626	331950
10.7	19.8136	341615	283.85	332972											10.7	283.85	-1420.31	-5016.35	-3596.04	12.4067	0.92541	331873
10.8	19.7972	341332	283.95	332689											10.8	283.95	-1419.04	-5048.52	-3629.49	12.3678	0.925193	331795
10.9	19.7815	341060	284.05	332417											10.9	284.05	-1417.75	-5080.7	-3662.95	12.3288	0.924974	331717
11	19.7765	340975	284.15	332332											11	284.15	-1416.46	-5112.88	-3696.42	12.2896	0.924753	331637
11.1	19.7677	340823	284.25	332180											11.1	284.25	-1415.15	-5145.05	-3729.9	12.2504	0.924531	331558
11.2	19.7632	340744	284.35	332101											11.2	284.35	-1413.83	-5177.23	-3763.39	12.2111	0.924306	331477
11.3	19.7513	340539	284.45	331896											11.3	284.45	-1412.51	-5209.4	-3796.9	12.1717	0.92408	331396
11.4	19.736	340276	284.55	331633											11.4	284.55	-1411.17	-5241.58	-3830.41	12.1322	0.923852	331314
11.5	19.7248	340083	284.65	331440											11.5	284.65	-1409.81	-5273.75	-3863.94	12.0927	0.923621	331231
11.6	19.7163	339937	284.75	331294											11.6	284.75	-1408.45	-5305.93	-3897.48	12.053	0.923389	331148
11.7	19.7151	339915	284.85	331272											11.7	284.85	-1407.08	-5338.1	-3931.03	12.0133	0.923155	331064
11.8	19.7011	339674	284.95	331031											11.8	284.95	-1405.69	-5370.28	-3964.59	11.9735	0.92292	330980
11.9	19.6828	339359	285.05	330716											11.9	285.05	-1404.29	-5402.46	-3998.16	11.9336	0.922682	330895
12	19.6678	339100	285.15	330457											12	285.15	-1402.89	-5434.63	-4031.75	11.8936	0.922442	330809
12.1	19.6534	338852	285.25	330209											12.1	285.25	-1401.47	-5466.81	-4065.34	11.8536	0.922201	330722
12.2	19.6386	338596	285.35	329953											12.2	285.35	-1400.03	-5498.98	-4098.95	11.8134	0.921957	330635
12.3	19.6242	338349	285.45	329706											12.3	285.45	-1398.59	-5531.16	-4132.56	11.7733	0.921711	330547
12.4	19.6125	338147	285.55	329504											12.4	285.55	-1397.14	-5563.33	-4166.19	11.733	0.921464	330458
12.5	19.6098	338100	285.65	329457											12.5	285.65	-1395.67	-5595.51	-4199.83	11.6927	0.921214	330368
12.6	19.6037	337994	285.75	329352											12.6	285.75	-1394.2	-5627.68	-4233.48	11.6523	0.920963	330278
12.7	19.5974	337886	285.85	329243											12.7	285.85	-1392.71	-5659.86	-4267.15	11.6119	0.920709	330187
12.8	19.5849	337670	285.95	329027											12.8	285.95	-1391.21	-5692.03	-4300.82	11.5713	0.920454	330096
12.9	19.5697	337409	286.05	328766											12.9	286.05	-1389.7	-5724.21	-4334.51	11.5308	0.920196	330003
13	19.5608	337255	286.15	328612											13	286.15	-1388.18	-5756.39	-4368.2	11.4901	0.919937	329910
13.1	19.5486	337044	286.25	328401											13.1	286.25	-1386.65	-5788.56	-4401.91	11.4495	0.919675	329816
13.2	19.5404	336904	286.35	328261											13.2	286.35	-1385.11	-5820.74	-4435.63	11.4087	0.919412	329722
13.3	19.5215	336578	286.45	327935											13.3	286.45	-1383.55	-5852.91	-4469.36	11.368	0.919146	329626
13.4	19.5185	336526	286.55	327883											13.4	286.55	-1381.99	-5885.09	-4503.1	11.3271	0.918878	329530
13.5	19.5008	336221	286.65	327578											13.5	286.65	-1380.41	-5917.26	-4536.85	11.2862	0.918608	329434
13.6	19.4905	336043	286.75	327400											13.6	286.75	-1378.82	-5949.44	-4570.62	11.2453	0.918336	329336
13.7	19.4842	335934	286.85	327291											13.7	286.85	-1377.22	-5981.61	-4604.39	11.2043	0.918062	329238
13.8	19.4723	335730	286.95	327087											13.8	286.95	-1375.61	-6013.79	-4638.18	11.1633	0.917786	329139
13.9	19.464	335587	287.05	326944											13.9	287.05	-1373.99	-6045.96	-4671.98	11.1223	0.917507	329039
14	19.4552	335435	287.15	326792											14	287.15	-1372.36	-6078.14	-4705.78	11.0812	0.917227	328938
14.1	19.4475	335301	287.25	326658											14.1	287.25	-1370.71	-6110.32	-4739.6	11.0401	0.916944	328837
14.2	19.4363	335108	287.35	326465											14.2	287.35	-1369.06	-6142.49	-4773.44	10.9989	0.916659	328735
14.3	19.4316	335028	287.45	326385											14.3	287.45	-1367.39	-6174.67	-4807.28	10.9577	0.916372	328632
14.4	19.4154	334749	287.55	326106											14.4	287.55	-1365.71	-6206.84	-4841.13	10.9165	0.916083	328528
14.5	19.4057	334581	287.65	325938											14.5	287.65	-1364.02	-6239.02	-4875	10.8752	0.915791	328423
14.6	19.393	334362	287.75	325719											14.6	287.75	-1362.32	-6271.19	-4908.87	10.8339	0.915497	328318
14.7	19.378	334104	287.85	325461											14.7	287.85	-1360.61	-6303.37	-4942.76	10.7926	0.915201	328212
14.8	19.3652	333883	287.95	325240											14.8	287.95	-1358.89	-6335.54	-4976.66	10.7513	0.914903	328105
14.9	19.3565	333733	288.05	325090											14.9	288.05	-1357.15	-6367.72	-5010.57	10.7099	0.914602	327997
15	19.3393	333435	288.15	324792											15	288.15	-1355.41	-6399.9	-5044.49	10.6686	0.9143	327888
15.1	19.3319	333309	288.25	324666											15.1	288.25	-1353.65	-6432.07	-5078.42	10.6272	0.913995	327779
15.2	19.3226	333148	288.35	324505											15.2	288.35	-1351.88	-6464.25	-5112.36	10.5858	0.913687	327669
15.3	19.3086	332907	288.45	324264											15.3	288.45	-1350.11	-6496.42	-5146.32	10.5443	0.913377	327558
15.4	19.3053	332849	288.55	324206											15.4	288.55	-1348.32	-6528.6	-5180.28	10.5029	0.913065	327446
15.5	19.297	332708	288.65	324065											15.5	288.65	-1346.52	-6560.77	-5214.26	10.4614	0.912751	327333
15.6	19.2881	332554	288.75	323911											15.6	288.75	-1344.7	-6592.95	-5248.24	10.42	0.912434	327219
15.7	19.2723	332281	288.85	323638											15.7	288.85	-1342.88	-6625.12	-5282.24	10.3785	0.912115	327105
15.8	19.2617	332098	288.95	323455											15.8	288.95	-1341.05	-6657.3	-5316.25	10.337	0.911793	326990
15.9	19.2532	331952	289.05	323309											15.9	289.05	-1339.2	-6689.47	-5350.27	10.2955	0.91147	326874
16	19.2415	331750	289.15	323107											16	289.15	-1337.34	-6721.65	-5384.31	10.2541	0.911143	326757
16.1	19.224	331448	289.25	322805											16.1	289.25	-1335.48	-6753.83	-5418.35	10.2126	0.910814	326639
16.2	19.2155	331302	289.35	322659											16.2	289.35	-1333.6	-6786	-5452.4	10.1711	0.910483	326520
16.3	19.2118	331238	289.45	322595											16.3	289.45	-1331.71	-6818.18	-5486.47	10.1296	0.910149	326400
16.4	19.2064	331145	289.55	322502											16.4	289.55	-1329.81	-6850.35	-5520.55	10.0881	0.909813	326280
16.5	19.1891	330847	289.65	322204											16.5	289.65	-1327.89	-6882.53	-5554.63	10.0466	0.909475	326158
16.6	19.178	330655	289.75	322012											16.6	289.75	-1325.97	-6914.7	-5588.73	10.0051	0.909133	326036
16.7	19.1665	330456	289.85	321813											16.7	289.85	-1324.04	-6946.88	-5622.84	9.96368	0.90879	325913
16.8	19.1553	330264	289.95	321621											16.8	289.95	-1322.09	-6979.05	-5656.96	9.92222	0.908444	325788
16.9	19.1392	329986	290.05	321343											16.9	290.05	-1320.13	-7011.23	-5691.09	9.88077	0.908095	325663
17	19.1277	329788	290.15	321145											17	290.15	-1318.17	-7043.4	-5725.24	9.83934	0.907743	325537
17.1	19.1174	329610	290.25	320967											17.1	290.25	-1316.19	-7075.58	-5759.39	9.79791	0.90739	325410
17.2	19.1045	329389	290.35	320746											17.2	290.35	-1314.2	-7107.76	-5793.56	9.75651	0.907033	325283
17.3	19.0926	329183	290.45	320540											17.3	290.45	-1312.2	-7139.93	-5827.73	9.71512	0.906674	325154
17.4	19.0814	328990	290.55	320347											17.4	290.55	-1310.19	-7172.11	-5861.92	9.67375	0.906312	325024
17.5	19.0683	328764	290.65	320121											17.5	290.65	-1308.16	-7204.28	-5896.12	9.63239	0.905948	324893
17.6	19.0597	328615	290.75	319972											17.6	290.75	-1306.13	-7236.46	-5930.33	9.59106	0.905581	324762
17.7	19.0512	328469	290.85	319826											17.7	290.85	-1304.08	-7268.63	-5964.55	9.54976	0.905211	324629
17.8	19.0436	328338	290.95	319695											17.8	290.95	-1302.03	-7300.81	-5998.78	9.50847	0.904839	324496
17.9	19.0285	328077	291.05	319434											17.9	291.05	-1299.96	-7332.98	-6033.02	9.46721	0.904464	324361
18	19.0199	327929	291.15	319286											18	291.15	-1297.88	-7365.16	-6067.28	9.42598	0.904086	324226
18.1	19.0071	327708	291.25	319065											18.1	291.25	-1295.79	-7397.34	-6101.54	9.38478	0.903705	324089
18.2	18.9966	327527	291.35	318884											18.2	291.35	-1293.69	-7429.51	-6135.82	9.34361	0.903322	323952
18.3	18.9863	327349	291.45	318706											18.3	291.45	-1291.58	-7461.69	-6170.11	9.30247	0.902936	323813
18.4	18.9658	326996	291.55	318353											18.4	291.55	-1289.46	-7493.86	-6204.4	9.26136	0.902547	323674
18.5	18.9495	326715	291.65	318072											18.5	291.65	-1287.32	-7526.04	-6238.71	9.22028	0.902155	323533
18.6	18.9364	326490	291.75	317847											18.6	291.75	-1285.18	-7558.21	-6273.03	9.17924	0.901761	323392
18.7	18.9215	326234	291.85	317591											18.7	291.85	-1283.02	-7590.39	-6307.36	9.13824	0.901364	323249
18.8	18.9133	326092	291.95	317449											18.8	291.95	-1280.86	-7622.56	-6341.71	9.09728	0.900963	323106
18.9	18.9077	325995	292.05	317352											18.9	292.05	-1278.68	-7654.74	-6376.06	9.05635	0.90056	322961
19	18.8942	325763	292.15	317120											19	292.15	-1276.49	-7686.91	-6410.42	9.01547	0.900154	322816
19.1	18.8849	325602	292.25	316959											19.1	292.25	-1274.29	-7719.09	-6444.8	8.97463	0.899746	322669
19.2	18.8769	325464	292.35	316821											19.2	292.35	-1272.08	-7751.27	-6479.19	8.93383	0.899334	322521
19.3	18.8654	325266	292.45	316623											19.3	292.45	-1269.86	-7783.44	-6513.58	8.89307	0.898919	322373
19.4	18.8478	324961	292.55	316318											19.4	292.55	-1267.63	-7815.62	-6547.99	8.85237	0.898502	322223
19.5	18.8389	324809	292.65	316166											19.5	292.65	-1265.38	-7847.79	-6582.41	8.81171	0.898081	322072
19.6	18.8192	324468	292.75	315825											19.6	292.75	-1263.13	-7879.97	-6616.84	8.7711	0.897657	321920
19.7	18.8014	324163	292.85	315520											19.7	292.85	-1260.86	-7912.14	-6651.28	8.73053	0.897231	321767
19.8	18.791	323983	292.95	315340											19.8	292.95	-1258.58	-7944.32	-6685.73	8.69002	0.896801	321613
19.9	18.7844	323870	293.05	315227											19.9	293.05	-1256.3	-7976.49	-6720.2	8.64956	0.896368	321458
20	18.7746	323701	293.15	315058											20	293.15	-1254	-8008.67	-6754.67	8.60916	0.895933	321302
20.1	18.7679	323584	293.25	314941											20.1	293.25	-1251.69	-8040.84	-6789.16	8.56881	0.895494	321144
20.2	18.7552	323365	293.35	314722											20.2	293.35	-1249.37	-8073.02	-6823.65	8.52851	0.895052	320986
20.3	18.7505	323285	293.45	314642											20.3	293.45	-1247.04	-8105.2	-6858.16	8.48828	0.894607	320826
20.4	18.7448	323187	293.55	314544											20.4	293.55	-1244.69	-8137.37	-6892.68	8.4481	0.894159	320665
20.5	18.7433	323161	293.65	314518											20.5	293.65	-1242.34	-8169.55	-6927.21	8.40798	0.893707	320504
20.6	18.7324	322972	293.75	314329											20.6	293.75	-1239.98	-8201.72	-6961.75	8.36792	0.893253	320341
20.7	18.7195	322751	293.85	314108											20.7	293.85	-1237.6	-8233.9	-6996.3	8.32792	0.892795	320176
20.8	18.7109	322602	293.95	313959											20.8	293.95	-1235.21	-8266.07	-7030.86	8.28799	0.892334	320011
20.9	18.7	322414	294.05	313771											20.9	294.05	-1232.82	-8298.25	-7065.43	8.24812	0.89187	319845
21	18.69	322242	294.15	313598											21	294.15	-1230.41	-8330.42	-7100.02	8.20831	0.891402	319677
21.1	18.6789	322050	294.25	313407											21.1	294.25	-1227.99	-8362.6	-7134.61	8.16857	0.890932	319508
21.2	18.6646	321803	294.35	313160											21.2	294.35	-1225.56	-8394.78	-7169.22	8.1289	0.890458	319338
21.3	18.6491	321536	294.45	312894											21.3	294.45	-1223.12	-8426.95	-7203.83	8.0893	0.88998	319167
21.4	18.6371	321329	294.55	312686											21.4	294.55	-1220.67	-8459.13	-7238.46	8.04976	0.8895	318995
21.5	18.6272	321159	294.65	312516											21.5	294.65	-1218.2	-8491.3	-7273.1	8.0103	0.889016	318821
21.6	18.6214	321059	294.75	312416											21.6	294.75	-1215.73	-8523.48	-7307.75	7.9709	0.888529	318646
21.7	18.6112	320883	294.85	312240											21.7	294.85	-1213.24	-8555.65	-7342.41	7.93158	0.888038	318470
21.8	18.6058	320789	294.95	312146											21.8	294.95	-1210.75	-8587.83	-7377.08	7.89234	0.887544	318293
21.9	18.5956	320614	295.05	311971											21.9	295.05	-1208.24	-8620	-7411.76	7.85316	0.887046	318115
22	18.5815	320371	295.15	311728											22	295.15	-1205.72	-8652.18	-7446.45	7.81407	0.886545	317935
22.1	18.5713	320195	295.25	311552											22.1	295.25	-1203.2	-8684.35	-7481.16	7.77505	0.88604	317754
22.2	18.5594	319990	295.35	311347											22.2	295.35	-1200.66	-8716.53	-7515.87	7.7361	0.885532	317572
22.3	18.5472	319779	295.45	311136											22.3	295.45	-1198.11	-8748.71	-7550.6	7.69724	0.885021	317389
22.4	18.5312	319504	295.55	310861											22.4	295.55	-1195.55	-8780.88	-7585.34	7.65845	0.884506	317204
22.5	18.5215	319336	295.65	310693											22.5	295.65	-1192.97	-8813.06	-7620.08	7.61975	0.883987	317018
22.6	18.5097	319133	295.75	310490											22.6	295.75	-1190.39	-8845.23	-7654.84	7.58112	0.883465	316831
22.7	18.4964	318903	295.85	310260											22.7	295.85	-1187.8	-8877.41	-7689.61	7.54258	0.882939	316642
22.8	18.4832	318676	295.95	310033											22.8	295.95	-1185.19	-8909.58	-7724.39	7.50412	0.88241	316452
22.9	18.4685	318423	296.05	309780											22.9	296.05	-1182.58	-8941.76	-7759.18	7.46575	0.881877	316261
23	18.4566	318217	296.15	309574											23	296.15	-1179.95	-8973.93	-7793.98	7.42746	0.88134	316069
23.1	18.4469	318049	296.25	309406											23.1	296.25	-1177.31	-9006.11	-7828.8	7.38926	0.8808	315875
23.2	18.4352	317848	296.35	309205											23.2	296.35	-1174.67	-9038.28	-7863.62	7.35114	0.880256	315680
23.3	18.4203	317591	296.45	308948											23.3	296.45	-1172.01	-9070.46	-7898.45	7.31311	0.879708	315483
23.4	18.4035	317302	296.55	308659											23.4	296.55	-1169.34	-9102.64	-7933.3	7.27516	0.879156	315285
23.5	18.3893	317056	296.65	308413											23.5	296.65	-1166.66	-9134.81	-7968.16	7.23731	0.878601	315086
23.6	18.3831	316951	296.75	308308											23.6	296.75	-1163.96	-9166.99	-8003.02	7.19955	0.878042	314886
23.7	18.3716	316752	296.85	308109											23.7	296.85	-1161.26	-9199.16	-8037.9	7.16187	0.877479	314684
23.8	18.3616	316579	296.95	307936											23.8	296.95	-1158.55	-9231.34	-8072.79	7.12429	0.876912	314481
23.9	18.3422	316245	297.05	307602											23.9	297.05	-1155.83	-9263.51	-8107.69	7.0868	0.876342	314276
24	18.3305	316044	297.15	307401											24	297.15	-1153.09	-9295.69	-8142.6	7.04941	0.875767	314070
24.1	18.3195	315853	297.25	307210											24.1	297.25	-1150.34	-9327.86	-8177.52	7.01211	0.875189	313862
24.2	18.3078	315651	297.35	307008											24.2	297.35	-1147.59	-9360.04	-8212.45	6.9749	0.874607	313654
24.3	18.2954	315438	297.45	306795											24.3	297.45	-1144.82	-9392.22	-8247.39	6.93778	0.87402	313443
24.4	18.2808	315185	297.55	306542											24.4	297.55	-1142.04	-9424.39	-8282.35	6.90077	0.87343	313232
24.5	18.272	315034	297.65	306391											24.5	297.65	-1139.25	-9456.57	-8317.31	6.86385	0.872836	313019
24.6	18.2625	314870	297.75	306227											24.6	297.75	-1136.45	-9488.74	-8352.29	6.82702	0.872238	312804
24.7	18.2505	314663	297.85	306020											24.7	297.85	-1133.64	-9520.92	-8387.27	6.7903	0.871635	312588
24.8	18.2346	314390	297.95	305747											24.8	297.95	-1130.82	-9553.09	-8422.27	6.75367	0.871029	312371
24.9	18.2129	314016	298.05	305373											24.9	298.05	-1127.99	-9585.27	-8457.28	6.71715	0.870418	312152
25	18.1995	313785	298.15	305142											25	298.15	-1125.15	-9617.44	-8492.3	6.68072	0.869804	311931
25.1	18.1851	313536	298.25	304893											25.1	298.25	-1122.29	-9649.62	-8527.33	6.6444	0.869185	311709
25.2	18.1726	313321	298.35	304678											25.2	298.35	-1119.43	-9681.79	-8562.37	6.60817	0.868562	311486
25.3	18.1528	312980	298.45	304337											25.3	298.45	-1116.55	-9713.97	-8597.42	6.57205	0.867935	311261
25.4	18.1403	312763	298.55	304120											25.4	298.55	-1113.67	-9746.15	-8632.48	6.53603	0.867304	311035
25.5	18.1314	312610	298.65	303967											25.5	298.65	-1110.77	-9778.32	-8667.55	6.50011	0.866669	310807
25.6	18.1182	312383	298.75	303740											25.6	298.75	-1107.86	-9810.5	-8702.63	6.4643	0.866029	310578
25.7	18.1076	312200	298.85	303557											25.7	298.85	-1104.94	-9842.67	-8737.73	6.42859	0.865385	310347
25.8	18.0973	312023	298.95	303380											25.8	298.95	-1102.02	-9874.85	-8772.83	6.39299	0.864737	310114
25.9	18.0841	311794	299.05	303151											25.9	299.05	-1099.08	-9907.02	-8807.95	6.35749	0.864084	309880
26	18.0735	311611	299.15	302968											26	299.15	-1096.12	-9939.2	-8843.07	6.3221	0.863427	309644
26.1	18.0576	311337	299.25	302694											26.1	299.25	-1093.16	-9971.37	-8878.21	6.28682	0.862766	309407
26.2	18.0475	311164	299.35	302521											26.2	299.35	-1090.19	-10003.5	-8913.36	6.25164	0.8621	309169
26.3	18.0369	310981	299.45	302338											26.3	299.45	-1087.21	-10035.7	-8948.52	6.21657	0.86143	308928
26.4	18.0227	310736	299.55	302093											26.4	299.55	-1084.21	-10067.9	-8983.69	6.18161	0.860756	308686
26.5	18.0096	310510	299.65	301867											26.5	299.65	-1081.21	-10100.1	-9018.87	6.14676	0.860076	308443
26.6	17.9959	310275	299.75	301632											26.6	299.75	-1078.19	-10132.3	-9054.06	6.11202	0.859393	308198
26.7	17.9838	310066	299.85	301423											26.7	299.85	-1075.17	-10164.4	-9089.26	6.07739	0.858705	307951
26.8	17.9675	309784	299.95	301141											26.8	299.95	-1072.13	-10196.6	-9124.47	6.04286	0.858012	307703
26.9	17.9522	309520	300.05	300877											26.9	300.05	-1069.09	-10228.8	-9159.69	6.00845	0.857315	307453
27	17.9446	309389	300.15	300746											27	300.15	-1066.03	-10261	-9194.93	5.97415	0.856613	307201
27.1	17.9352	309228	300.25	300585											27.1	300.25	-1062.96	-10293.1	-9230.17	5.93996	0.855907	306948
27.2	17.9247	309047	300.35	300404											27.2	300.35	-1059.88	-10325.3	-9265.43	5.90589	0.855196	306693
27.3	17.9102	308797	300.45	300154											27.3	300.45	-1056.79	-10357.5	-9300.69	5.87192	0.85448	306436
27.4	17.8931	308501	300.55	299858											27.4	300.55	-1053.69	-10389.7	-9335.97	5.83807	0.85376	306178
27.5	17.8803	308282	300.65	299639											27.5	300.65	-1050.58	-10421.8	-9371.25	5.80434	0.853035	305918
27.6	17.8702	308108	300.75	299465											27.6	300.75	-1047.45	-10454	-9406.55	5.77071	0.852305	305656
27.7	17.8543	307832	300.85	299189											27.7	300.85	-1044.32	-10486.2	-9441.86	5.7372	0.85157	305392
27.8	17.8376	307544	300.95	298901											27.8	300.95	-1041.18	-10518.4	-9477.18	5.70381	0.850831	305127
27.9	17.8222	307279	301.05	298636											27.9	301.05	-1038.02	-10550.5	-9512.51	5.67053	0.850087	304860
28	17.8038	306962	301.15	298319											28	301.15	-1034.86	-10582.7	-9547.85	5.63737	0.849338	304592
28.1	17.791	306741	301.25	298098											28.1	301.25	-1031.68	-10614.9	-9583.2	5.60432	0.848584	304321
28.2	17.7745	306457	301.35	297814											28.2	301.35	-1028.49	-10647.1	-9618.56	5.57138	0.847825	304049
28.3	17.7588	306185	301.45	297542											28.3	301.45	-1025.3	-10679.2	-9653.94	5.53857	0.847061	303775
28.4	17.7395	305853	301.55	297210											28.4	301.55	-1022.09	-10711.4	-9689.32	5.50587	0.846293	303500
28.5	17.7242	305589	301.65	296946											28.5	301.65	-1018.87	-10743.6	-9724.71	5.47329	0.845519	303222
28.6	17.7123	305385	301.75	296742											28.6	301.75	-1015.64	-10775.8	-9760.12	5.44082	0.84474	302943
28.7	17.6884	304972	301.85	296329											28.7	301.85	-1012.4	-10807.9	-9795.53	5.40848	0.843957	302662
28.8	17.6702	304659	301.95	296016											28.8	301.95	-1009.15	-10840.1	-9830.96	5.37625	0.843168	302379
28.9	17.6561	304416	302.05	295773											28.9	302.05	-1005.89	-10872.3	-9866.4	5.34414	0.842374	302094
29	17.6454	304231	302.15	295588											29	302.15	-1002.62	-10904.5	-9901.84	5.31215	0.841575	301808
29.1	17.6375	304095	302.25	295452											29.1	302.25	-999.336	-10936.6	-9937.3	5.28027	0.840771	301520
29.2	17.6214	303818	302.35	295175											29.2	302.35	-996.043	-10968.8	-9972.77	5.24852	0.839962	301229
29.3	17.609	303603	302.45	294960											29.3	302.45	-992.74	-11001	-10008.2	5.21689	0.839148	300937
29.4	17.5936	303338	302.55	294695											29.4	302.55	-989.425	-11033.2	-10043.7	5.18537	0.838328	300643
29.5	17.5712	302953	302.65	294310											29.5	302.65	-986.1	-11065.3	-10079.2	5.15398	0.837503	300348
29.6	17.5615	302785	302.75	294142											29.6	302.75	-982.765	-11097.5	-10114.8	5.1227	0.836673	300050
29.7	17.5407	302426	302.85	293783											29.7	302.85	-979.418	-11129.7	-10150.3	5.09155	0.835838	299750
29.8	17.5221	302105	302.95	293462											29.8	302.95	-976.061	-11161.9	-10185.8	5.06051	0.834997	299449
29.9	17.5005	301734	303.05	293091											29.9	303.05	-972.694	-11194	-10221.3	5.0296	0.834152	299146
30	17.4774	301334	303.15	292691											30	303.15	-969.316	-11226.2	-10256.9	4.99881	0.8333	298840
30.1	17.4611	301053	303.25	292410											30.1	303.25	-965.927	-11258.4	-10292.5	4.96814	0.832443	298533
30.2	17.4459	300791	303.35	292148											30.2	303.35	-962.528	-11290.6	-10328	4.93759	0.831581	298224
30.3	17.4326	300562	303.45	291919											30.3	303.45	-959.118	-11322.7	-10363.6	4.90716	0.830714	297913
30.4	17.4156	300269	303.55	291626											30.4	303.55	-955.697	-11354.9	-10399.2	4.87685	0.829841	297600
30.5	17.3885	299802	303.65	291159											30.5	303.65	-952.266	-11387.1	-10434.8	4.84667	0.828962	297285
30.6	17.3698	299479	303.75	290836											30.6	303.75	-948.824	-11419.3	-10470.4	4.8166	0.828078	296968
30.7	17.3545	299216	303.85	290573											30.7	303.85	-945.372	-11451.4	-10506.1	4.78666	0.827189	296649
30.8	17.339	298949	303.95	290306											30.8	303.95	-941.909	-11483.6	-10541.7	4.75684	0.826294	296328
30.9	17.3293	298781	304.05	290138											30.9	304.05	-938.435	-11515.8	-10577.4	4.72715	0.825393	296005
31	17.3173	298575	304.15	289932											31	304.15	-934.951	-11548	-10613	4.69757	0.824487	295680
31.1	17.2977	298237	304.25	289594											31.1	304.25	-931.457	-11580.1	-10648.7	4.66812	0.823575	295353
31.2	17.2765	297871	304.35	289228											31.2	304.35	-927.951	-11612.3	-10684.4	4.63879	0.822657	295023
31.3	17.255	297500	304.45	288857											31.3	304.45	-924.435	-11644.5	-10720.1	4.60959	0.821734	294692
31.4	17.2414	297265	304.55	288622											31.4	304.55	-920.909	-11676.7	-10755.8	4.58051	0.820805	294359
31.5	17.2281	297036	304.65	288393											31.5	304.65	-917.372	-11708.8	-10791.5	4.55155	0.81987	294024
31.6	17.2158	296824	304.75	288181											31.6	304.75	-913.825	-11741	-10827.2	4.52271	0.818929	293687
31.7	17.1991	296537	304.85	287894											31.7	304.85	-910.266	-11773.2	-10862.9	4.494	0.817983	293347
31.8	17.1756	296131	304.95	287488											31.8	304.95	-906.698	-11805.4	-10898.7	4.4654	0.817031	293006
31.9	17.1567	295805	305.05	287162											31.9	305.05	-903.119	-11837.6	-10934.4	4.43694	0.816073	292662
32	17.1414	295541	305.15	286898											32	305.15	-899.529	-11869.7	-10970.2	4.40859	0.815109	292317
32.1	17.125	295259	305.25	286616											32.1	305.25	-895.929	-11901.9	-11006	4.38037	0.814139	291969
32.2	17.1054	294921	305.35	286278											32.2	305.35	-892.318	-11934.1	-11041.8	4.35228	0.813164	291619
32.3	17.0897	294650	305.45	286007											32.3	305.45	-888.696	-11966.3	-11077.6	4.3243	0.812182	291267
32.4	17.0702	294313	305.55	285670											32.4	305.55	-885.064	-11998.4	-11113.4	4.29645	0.811194	290913
32.5	17.0491	293950	305.65	285307											32.5	305.65	-881.422	-12030.6	-11149.2	4.26872	0.810201	290556
32.6	17.0258	293549	305.75	284906											32.6	305.75	-877.769	-12062.8	-11185	4.24112	0.809201	290198
32.7	17.0004	293110	305.85	284467											32.7	305.85	-874.106	-12095	-11220.9	4.21364	0.808195	289837
32.8	16.9801	292760	305.95	284117											32.8	305.95	-870.432	-12127.1	-11256.7	4.18628	0.807184	289474
32.9	16.9616	292441	306.05	283798											32.9	306.05	-866.747	-12159.3	-11292.6	4.15905	0.806166	289109
33	16.9445	292147	306.15	283504											33	306.15	-863.052	-12191.5	-11328.4	4.13194	0.805142	288742
33.1	16.9279	291860	306.25	283217											33.1	306.25	-859.347	-12223.7	-11364.3	4.10495	0.804112	288373
33.2	16.9106	291562	306.35	282919											33.2	306.35	-855.63	-12255.8	-11400.2	4.07809	0.803075	288001
33.3	16.8894	291197	306.45	282554											33.3	306.45	-851.904	-12288	-11436.1	4.05135	0.802033	287627
33.4	16.8744	290937	306.55	282294											33.4	306.55	-848.167	-12320.2	-11472	4.02473	0.800984	287251
33.5	16.8429	290395	306.65	281752											33.5	306.65	-844.419	-12352.4	-11507.9	3.99824	0.799929	286873
33.6	16.8167	289944	306.75	281301											33.6	306.75	-840.661	-12384.5	-11543.9	3.97187	0.798868	286492
33.7	16.793	289534	306.85	280891											33.7	306.85	-836.893	-12416.7	-11579.8	3.94562	0.797801	286109
33.8	16.7692	289124	306.95	280481											33.8	306.95	-833.114	-12448.9	-11615.8	3.91949	0.796727	285724
33.9	16.7496	288786	307.05	280143											33.9	307.05	-829.324	-12481.1	-11651.7	3.89349	0.795647	285337
34	16.7254	288369	307.15	279726											34	307.15	-825.524	-12513.2	-11687.7	3.86761	0.794561	284947
34.1	16.701	287948	307.25	279305											34.1	307.25	-821.714	-12545.4	-11723.7	3.84186	0.793468	284555
34.2	16.6791	287570	307.35	278927											34.2	307.35	-817.893	-12577.6	-11759.7	3.81622	0.792368	284161
34.3	16.6553	287160	307.45	278517											34.3	307.45	-814.061	-12609.8	-11795.7	3.79071	0.791263	283765
34.4	16.6362	286831	307.55	278188											34.4	307.55	-810.22	-12641.9	-11831.7	3.76532	0.790151	283366
34.5	16.617	286500	307.65	277857											34.5	307.65	-806.367	-12674.1	-11867.7	3.74006	0.789032	282965
34.6	16.5934	286093	307.75	277450											34.6	307.75	-802.505	-12706.3	-11903.8	3.71491	0.787907	282561
34.7	16.5711	285708	307.85	277065											34.7	307.85	-798.631	-12738.5	-11939.8	3.68989	0.786776	282155
34.8	16.5487	285323	307.95	276680											34.8	307.95	-794.748	-12770.6	-11975.9	3.66499	0.785637	281747
34.9	16.5287	284978	308.05	276335											34.9	308.05	-790.853	-12802.8	-12012	3.64022	0.784493	281337
35	16.5006	284493	308.15	275850											35	308.15	-786.949	-12835	-12048	3.61556	0.783342	280924
35.1	16.4829	284188	308.25	275545											35.1	308.25	-783.034	-12867.2	-12084.1	3.59103	0.782184	280509
35.2	16.4565	283733	308.35	275090											35.2	308.35	-779.108	-12899.3	-12120.2	3.56661	0.781019	280091
35.3	16.4368	283393	308.45	274750											35.3	308.45	-775.173	-12931.5	-12156.3	3.54232	0.779848	279671
35.4	16.41	282932	308.55	274289											35.4	308.55	-771.226	-12963.7	-12192.5	3.51815	0.778671	279249
35.5	16.3782	282383	308.65	273740											35.5	308.65	-767.269	-12995.9	-12228.6	3.4941	0.777486	278824
35.6	16.35	281897	308.75	273254											35.6	308.75	-763.302	-13028	-12264.7	3.47017	0.776295	278397
35.7	16.3227	281425	308.85	272782											35.7	308.85	-759.325	-13060.2	-12300.9	3.44637	0.775097	277967
35.8	16.3029	281084	308.95	272441											35.8	308.95	-755.337	-13092.4	-12337.1	3.42268	0.773893	277535
35.9	16.281	280707	309.05	272064											35.9	309.05	-751.338	-13124.6	-12373.2	3.39911	0.772681	277101
36	16.2564	280284	309.15	271641											36	309.15	-747.329	-13156.7	-12409.4	3.37566	0.771463	276664
36.1	16.2313	279850	309.25	271207											36.1	309.25	-743.31	-13188.9	-12445.6	3.35234	0.770238	276225
36.2	16.2068	279427	309.35	270784											36.2	309.35	-739.281	-13221.1	-12481.8	3.32913	0.769007	275783
36.3	16.182	279000	309.45	270357											36.3	309.45	-735.24	-13253.3	-12518	3.30604	0.767768	275339
36.4	16.1499	278447	309.55	269804											36.4	309.55	-731.19	-13285.4	-12554.3	3.28307	0.766523	274892
36.5	16.1221	277967	309.65	269324											36.5	309.65	-727.129	-13317.6	-12590.5	3.26023	0.765271	274443
36.6	16.1	277585	309.75	268942											36.6	309.75	-723.058	-13349.8	-12626.7	3.2375	0.764012	273992
36.7	16.0743	277142	309.85	268499											36.7	309.85	-718.976	-13382	-12663	3.21488	0.762746	273538
36.8	16.0519	276756	309.95	268113											36.8	309.95	-714.884	-13414.2	-12699.3	3.19239	0.761473	273081
36.9	16.0294	276369	310.05	267726											36.9	310.05	-710.782	-13446.3	-12735.5	3.17002	0.760193	272622
37	16.0066	275975	310.15	267332											37	310.15	-706.669	-13478.5	-12771.8	3.14776	0.758906	272161
37.1	15.9847	275598	310.25	266955											37.1	310.25	-702.546	-13510.7	-12808.1	3.12562	0.757612	271697
37.2	15.9648	275254	310.35	266611											37.2	310.35	-698.413	-13542.9	-12844.4	3.1036	0.756312	271230
37.3	15.9428	274875	310.45	266232											37.3	310.45	-694.269	-13575	-12880.8	3.0817	0.755004	270761
37.4	15.9234	274541	310.55	265898											37.4	310.55	-690.114	-13607.2	-12917.1	3.05991	0.753689	270290
37.5	15.8979	274101	310.65	265458											37.5	310.65	-685.95	-13639.4	-12953.4	3.03824	0.752367	269816
37.6	15.8693	273609	310.75	264966											37.6	310.75	-681.775	-13671.6	-12989.8	3.01669	0.751039	269339
37.7	15.8383	273074	310.85	264431											37.7	310.85	-677.59	-13703.7	-13026.1	2.99525	0.749703	268860
37.8	15.81	272586	310.95	263943											37.8	310.95	-673.394	-13735.9	-13062.5	2.97393	0.74836	268379
37.9	15.7784	272041	311.05	263398											37.9	311.05	-669.188	-13768.1	-13098.9	2.95273	0.74701	267895
38	15.7506	271562	311.15	262919											38	311.15	-664.971	-13800.3	-13135.3	2.93164	0.745653	267408
38.1	15.72	271034	311.25	262392											38.1	311.25	-660.745	-13832.4	-13171.7	2.91067	0.744289	266919
38.2	15.6919	270550	311.35	261907											38.2	311.35	-656.508	-13864.6	-13208.1	2.88981	0.742918	266427
38.3	15.6647	270080	311.45	261437											38.3	311.45	-652.26	-13896.8	-13244.5	2.86906	0.74154	265933
38.4	15.6382	269623	311.55	260980											38.4	311.55	-648.003	-13929	-13281	2.84844	0.740154	265436
38.5	15.6183	269281	311.65	260638											38.5	311.65	-643.735	-13961.1	-13317.4	2.82792	0.738762	264937
38.6	15.5921	268830	311.75	260187											38.6	311.75	-639.456	-13993.3	-13353.9	2.80752	0.737362	264435
38.7	15.5659	268377	311.85	259734											38.7	311.85	-635.168	-14025.5	-13390.3	2.78723	0.735955	263930
38.8	15.5378	267893	311.95	259250											38.8	311.95	-630.869	-14057.7	-13426.8	2.76706	0.734541	263423
38.9	15.5036	267304	312.05	258661											38.9	312.05	-626.559	-14089.8	-13463.3	2.747	0.73312	262913
39	15.4709	266739	312.15	258096											39	312.15	-622.24	-14122	-13499.8	2.72705	0.731691	262401
39.1	15.4388	266186	312.25	257543											39.1	312.25	-617.91	-14154.2	-13536.3	2.70722	0.730256	261886
39.2	15.4059	265618	312.35	256975											39.2	312.35	-613.57	-14186.4	-13572.8	2.68749	0.728813	261369
39.3	15.37	265000	312.45	256357											39.3	312.45	-609.219	-14218.5	-13609.3	2.66788	0.727363	260849
39.4	15.3353	264402	312.55	255759											39.4	312.55	-604.858	-14250.7	-13645.9	2.64838	0.725906	260326
39.5	15.3173	264091	312.65	255448											39.5	312.65	-600.487	-14282.9	-13682.4	2.62899	0.724442	259801
39.6	15.2849	263532	312.75	254889											39.6	312.75	-596.106	-14315.1	-13719	2.60972	0.72297	259273
39.7	15.262	263138	312.85	254495											39.7	312.85	-591.714	-14347.2	-13755.5	2.59055	0.721491	258743
39.8	15.2406	262768	312.95	254125											39.8	312.95	-587.312	-14379.4	-13792.1	2.57149	0.720005	258210
39.9	15.21	262242	313.05	253599											39.9	313.05	-582.9	-14411.6	-13828.7	2.55255	0.718512	257675
40	15.1753	261643	313.15	253000											40	313.15	-578.477	-14443.8	-13865.3	2.53371	0.717011	257136
40.1	15.1495	261198	313.25	252555											40.1	313.25	-574.044	-14475.9	-13901.9	2.51498	0.715504	256596
40.2	15.1172	260642	313.35	251999											40.2	313.35	-569.601	-14508.1	-13938.5	2.49637	0.713989	256053
40.3	15.0873	260126	313.45	251483											40.3	313.45	-565.148	-14540.3	-13975.1	2.47786	0.712467	255507
40.4	15.0519	259516	313.55	250873											40.4	313.55	-560.684	-14572.5	-14011.8	2.45946	0.710937	254958
40.5	15.0219	258999	313.65	250356											40.5	313.65	-556.21	-14604.6	-14048.4	2.44116	0.709401	254407
40.6	14.9861	258381	313.75	249738											40.6	313.75	-551.726	-14636.8	-14085.1	2.42298	0.707857	253853
40.7	14.9533	257815	313.85	249172											40.7	313.85	-547.232	-14669	-14121.8	2.4049	0.706306	253297
40.8	14.9239	257308	313.95	248665											40.8	313.95	-542.727	-14701.2	-14158.4	2.38693	0.704747	252738
40.9	14.8903	256729	314.05	248086											40.9	314.05	-538.212	-14733.3	-14195.1	2.36907	0.703182	252177
41	14.8591	256191	314.15	247548											41	314.15	-533.687	-14765.5	-14231.8	2.35131	0.701609	251613
41.1	14.8296	255683	314.25	247040											41.1	314.25	-529.152	-14797.7	-14268.5	2.33366	0.700029	251046
41.2	14.7999	255171	314.35	246528											41.2	314.35	-524.606	-14829.9	-14305.3	2.31611	0.698442	250477
41.3	14.7751	254743	314.45	246100											41.3	314.45	-520.05	-14862	-14342	2.29867	0.696847	249905
41.4	14.7495	254301	314.55	245658											41.4	314.55	-515.484	-14894.2	-14378.7	2.28133	0.695246	249331
41.5	14.7186	253770	314.65	245127											41.5	314.65	-510.908	-14926.4	-14415.5	2.2641	0.693637	248754
41.6	14.6862	253210	314.75	244567											41.6	314.75	-506.321	-14958.6	-14452.3	2.24698	0.692021	248174
41.7	14.6499	252585	314.85	243942											41.7	314.85	-501.725	-14990.7	-14489	2.22995	0.690398	247592
41.8	14.6181	252035	314.95	243392											41.8	314.95	-497.118	-15022.9	-14525.8	2.21303	0.688768	247008
41.9	14.5886	251528	315.05	242885											41.9	315.05	-492.5	-15055.1	-14562.6	2.19622	0.68713	246420
42	14.5674	251162	315.15	242519											42	315.15	-487.873	-15087.3	-14599.4	2.1795	0.685485	245831
42.1	14.5462	250796	315.25	242153											42.1	315.25	-483.235	-15119.5	-14636.2	2.16289	0.683834	245238
42.2	14.5183	250315	315.35	241672											42.2	315.35	-478.587	-15151.6	-14673	2.14638	0.682175	244643
42.3	14.4863	249764	315.45	241121											42.3	315.45	-473.929	-15183.8	-14709.9	2.12998	0.680509	244046
42.4	14.4529	249188	315.55	240545											42.4	315.55	-469.261	-15216	-14746.7	2.11367	0.678836	243446
42.5	14.4205	248630	315.65	239987											42.5	315.65	-464.583	-15248.2	-14783.6	2.09746	0.677155	242843
42.6	14.3956	248200	315.75	239557											42.6	315.75	-459.894	-15280.3	-14820.4	2.08136	0.675468	242238
42.7	14.3655	247681	315.85	239038											42.7	315.85	-455.195	-15312.5	-14857.3	2.06536	0.673774	241630
42.8	14.3422	247280	315.95	238637											42.8	315.95	-450.486	-15344.7	-14894.2	2.04945	0.672072	241020
42.9	14.3134	246783	316.05	238140											42.9	316.05	-445.767	-15376.9	-14931.1	2.03365	0.670364	240408
43	14.2872	246332	316.15	237689											43	316.15	-441.038	-15409	-14968	2.01794	0.668648	239792
43.1	14.249	245673	316.25	237030											43.1	316.25	-436.298	-15441.2	-15004.9	2.00233	0.666926	239175
43.2	14.2135	245060	316.35	236417											43.2	316.35	-431.548	-15473.4	-15041.8	1.98682	0.665196	238554
43.3	14.1881	244622	316.45	235979											43.3	316.45	-426.789	-15505.6	-15078.8	1.97141	0.66346	237932
43.4	14.161	244155	316.55	235512											43.4	316.55	-422.018	-15537.7	-15115.7	1.9561	0.661716	237306
43.5	14.1343	243694	316.65	235051											43.5	316.65	-417.238	-15569.9	-15152.7	1.94088	0.659966	236679
43.6	14.1019	243137	316.75	234494											43.6	316.75	-412.448	-15602.1	-15189.6	1.92576	0.658209	236049
43.7	14.0659	242516	316.85	233873											43.7	316.85	-407.647	-15634.3	-15226.6	1.91074	0.656445	235416
43.8	14.0325	241940	316.95	233296											43.8	316.95	-402.837	-15666.4	-15263.6	1.89581	0.654674	234781
43.9	13.9978	241342	317.05	232699											43.9	317.05	-398.016	-15698.6	-15300.6	1.88098	0.652896	234143
44	13.9731	240916	317.15	232273											44	317.15	-393.185	-15730.8	-15337.6	1.86624	0.651111	233503
44.1	13.945	240431	317.25	231788											44.1	317.25	-388.344	-15763	-15374.6	1.8516	0.64932	232861
44.2	13.9132	239883	317.35	231240											44.2	317.35	-383.492	-15795.1	-15411.6	1.83705	0.647522	232216
44.3	13.8821	239347	317.45	230704											44.3	317.45	-378.631	-15827.3	-15448.7	1.8226	0.645717	231569
44.4	13.847	238742	317.55	230099											44.4	317.55	-373.759	-15859.5	-15485.7	1.80824	0.643905	230919
44.5	13.8125	238147	317.65	229504											44.5	317.65	-368.878	-15891.7	-15522.8	1.79398	0.642087	230267
44.6	13.7838	237653	317.75	229010											44.6	317.75	-363.986	-15923.8	-15559.9	1.7798	0.640262	229612
44.7	13.7492	237055	317.85	228412											44.7	317.85	-359.084	-15956	-15596.9	1.76572	0.638431	228956
44.8	13.7115	236405	317.95	227762											44.8	317.95	-354.172	-15988.2	-15634	1.75173	0.636593	228296
44.9	13.678	235828	318.05	227185											44.9	318.05	-349.25	-16020.4	-15671.1	1.73784	0.634748	227635
45	13.6533	235402	318.15	226759											45	318.15	-344.317	-16052.5	-15708.2	1.72403	0.632897	226971
45.1	13.6286	234976	318.25	226333											45.1	318.25	-339.375	-16084.7	-15745.3	1.71032	0.631039	226305
45.2	13.5992	234470	318.35	225827											45.2	318.35	-334.422	-16116.9	-15782.5	1.69669	0.629175	225636
45.3	13.5678	233928	318.45	225285											45.3	318.45	-329.46	-16149.1	-15819.6	1.68316	0.627305	224966
45.4	13.5375	233406	318.55	224763											45.4	318.55	-324.487	-16181.2	-15856.8	1.66971	0.625428	224293
45.5	13.4997	232754	318.65	224111											45.5	318.65	-319.504	-16213.4	-15893.9	1.65636	0.623545	223617
45.6	13.4611	232087	318.75	223444											45.6	318.75	-314.511	-16245.6	-15931.1	1.64309	0.621655	222940
45.7	13.4247	231461	318.85	222818											45.7	318.85	-309.508	-16277.8	-15968.3	1.62991	0.619759	222260
45.8	13.388	230828	318.95	222185											45.8	318.95	-304.495	-16309.9	-16005.4	1.61682	0.617857	221578
45.9	13.3521	230209	319.05	221566											45.9	319.05	-299.472	-16342.1	-16042.6	1.60382	0.615949	220893
46	13.3152	229572	319.15	220929											46	319.15	-294.439	-16374.3	-16079.9	1.59091	0.614035	220207
46.1	13.2786	228942	319.25	220299											46.1	319.25	-289.395	-16406.5	-16117.1	1.57808	0.612114	219518
46.2	13.2422	228314	319.35	219671											46.2	319.35	-284.342	-16438.6	-16154.3	1.56534	0.610188	218827
46.3	13.2042	227659	319.45	219016											46.3	319.45	-279.278	-16470.8	-16191.5	1.55268	0.608255	218134
46.4	13.1645	226974	319.55	218331											46.4	319.55	-274.205	-16503	-16228.8	1.54011	0.606317	217439
46.5	13.1319	226412	319.65	217769											46.5	319.65	-269.121	-16535.2	-16266.1	1.52763	0.604372	216741
46.6	13.099	225845	319.75	217202											46.6	319.75	-264.027	-16567.3	-16303.3	1.51523	0.602422	216042
46.7	13.0717	225373	319.85	216730											46.7	319.85	-258.923	-16599.5	-16340.6	1.50291	0.600466	215341
46.8	13.0398	224825	319.95	216182											46.8	319.95	-253.81	-16631.7	-16377.9	1.49068	0.598504	214637
46.9	13.0058	224238	320.05	215595											46.9	320.05	-248.686	-16663.9	-16415.2	1.47854	0.596536	213931
47	12.9702	223624	320.15	214981											47	320.15	-243.552	-16696	-16452.5	1.46647	0.594563	213224
47.1	12.9408	223118	320.25	214475											47.1	320.25	-238.408	-16728.2	-16489.8	1.45449	0.592584	212514
47.2	12.911	222604	320.35	213961											47.2	320.35	-233.254	-16760.4	-16527.1	1.44259	0.590599	211802
47.3	12.8746	221976	320.45	213333											47.3	320.45	-228.089	-16792.6	-16564.5	1.43078	0.588609	211088
47.4	12.8397	221373	320.55	212730											47.4	320.55	-222.915	-16824.8	-16601.8	1.41904	0.586613	210373
47.5	12.8087	220839	320.65	212196											47.5	320.65	-217.731	-16856.9	-16639.2	1.40739	0.584612	209655
47.6	12.7732	220228	320.75	211585											47.6	320.75	-212.537	-16889.1	-16676.6	1.39582	0.582606	208936
47.7	12.7339	219550	320.85	210907											47.7	320.85	-207.333	-16921.3	-16713.9	1.38433	0.580594	208214
47.8	12.6951	218880	320.95	210237											47.8	320.95	-202.118	-16953.5	-16751.3	1.37291	0.578577	207491
47.9	12.6565	218215	321.05	209572											47.9	321.05	-196.894	-16985.6	-16788.7	1.36158	0.576555	206766
48	12.6219	217619	321.15	208976											48	321.15	-191.66	-17017.8	-16826.1	1.35033	0.574528	206039
48.1	12.5818	216928	321.25	208285											48.1	321.25	-186.415	-17050	-16863.6	1.33916	0.572495	205310
48.2	12.5462	216314	321.35	207671											48.2	321.35	-181.161	-17082.2	-16901	1.32806	0.570458	204579
48.3	12.5046	215597	321.45	206954											48.3	321.45	-175.897	-17114.3	-16938.4	1.31704	0.568415	203847
48.4	12.458	214793	321.55	206150											48.4	321.55	-170.622	-17146.5	-16975.9	1.3061	0.566368	203112
48.5	12.4162	214073	321.65	205430											48.5	321.65	-165.338	-17178.7	-17013.3	1.29524	0.564316	202376
48.6	12.3756	213372	321.75	204729											48.6	321.75	-160.043	-17210.9	-17050.8	1.28446	0.562259	201639
48.7	12.3323	212626	321.85	203983											48.7	321.85	-154.739	-17243	-17088.3	1.27375	0.560197	200899
48.8	12.2945	211974	321.95	203331											48.8	321.95	-149.425	-17275.2	-17125.8	1.26311	0.558131	200158
48.9	12.2525	211249	322.05	202606											48.9	322.05	-144.1	-17307.4	-17163.3	1.25256	0.55606	199416
49	12.2099	210516	322.15	201873											49	322.15	-138.766	-17339.6	-17200.8	1.24208	0.553985	198671
49.1	12.166	209759	322.25	201116											49.1	322.25	-133.421	-17371.7	-17238.3	1.23167	0.551905	197926
49.2	12.1224	209006	322.35	200363											49.2	322.35	-128.067	-17403.9	-17275.8	1.22134	0.549821	197178
49.3	12.0805	208285	322.45	199642											49.3	322.45	-122.703	-17436.1	-17313.4	1.21108	0.547732	196429
49.4	12.0378	207548	322.55	198905											49.4	322.55	-117.328	-17468.3	-17350.9	1.20089	0.545639	195679
49.5	12.0022	206934	322.65	198291											49.5	322.65	-111.944	-17500.4	-17388.5	1.19078	0.543542	194927
49.6	11.9705	206388	322.75	197745											49.6	322.75	-106.55	-17532.6	-17426.1	1.18075	0.541441	194173
49.7	11.9315	205716	322.85	197073											49.7	322.85	-101.146	-17564.8	-17463.6	1.17078	0.539336	193418
49.8	11.895	205086	322.95	196443											49.8	322.95	-95.7315	-17597	-17501.2	1.16089	0.537227	192662
49.9	11.8612	204503	323.05	195860											49.9	323.05	-90.3074	-17629.1	-17538.8	1.15106	0.535114	191904
50	11.8224	203835	323.15	195192											50	323.15	-84.8732	-17661.3	-17576.4	1.14131	0.532997	191145
50.1	11.781	203120	323.25	194477											50.1	323.25	-79.4292	-17693.5	-17614.1	1.13164	0.530877	190384
50.2	11.7384	202386	323.35	193743											50.2	323.35	-73.9751	-17725.7	-17651.7	1.12203	0.528753	189623
50.3	11.6934	201611	323.45	192968											50.3	323.45	-68.5112	-17757.8	-17689.3	1.11249	0.526625	188860
50.4	11.6454	200783	323.55	192140											50.4	323.55	-63.0372	-17790	-17727	1.10302	0.524493	188095
50.5	11.6006	200010	323.65	191367											50.5	323.65	-57.5534	-17822.2	-17764.6	1.09362	0.522359	187330
50.6	11.5578	199273	323.75	190630											50.6	323.75	-52.0595	-17854.4	-17802.3	1.08429	0.520221	186563
50.7	11.5148	198532	323.85	189888											50.7	323.85	-46.5558	-17886.5	-17840	1.07503	0.518079	185795
50.8	11.4777	197891	323.95	189248											50.8	323.95	-41.0421	-17918.7	-17877.7	1.06584	0.515935	185026
50.9	11.4401	197243	324.05	188600											50.9	324.05	-35.5185	-17950.9	-17915.4	1.05671	0.513787	184256
51	11.3978	196514	324.15	187871											51	324.15	-29.9849	-17983.1	-17953.1	1.04765	0.511636	183484
51.1	11.3566	195804	324.25	187161											51.1	324.25	-24.4415	-18015.2	-17990.8	1.03866	0.509483	182712
51.2	11.3159	195101	324.35	186458											51.2	324.35	-18.8881	-18047.4	-18028.5	1.02974	0.507326	181939
51.3	11.2731	194364	324.45	185721											51.3	324.45	-13.3248	-18079.6	-18066.3	1.02088	0.505167	181164
51.4	11.2278	193583	324.55	184940											51.4	324.55	-7.75152	-18111.8	-18104	1.01209	0.503005	180389
51.5	11.1821	192795	324.65	184152											51.5	324.65	-2.16837	-18143.9	-18141.8	1.00337	0.50084	179613
51.6	11.141	192087	324.75	183444											51.6	324.75	3.42469	-18176.1	-18179.5	0.994707	0.498673	178835
51.7	11.0941	191278	324.85	182635											51.7	324.85	9.02765	-18208.3	-18217.3	0.986111	0.496504	178057
51.8	11.0488	190497	324.95	181854											51.8	324.95	14.6405	-18240.5	-18255.1	0.97758	0.494332	177278
51.9	11.0037	189720	325.05	181077											51.9	325.05	20.2633	-18272.6	-18292.9	0.969114	0.492157	176499
52	10.9622	189004	325.15	180361											52	325.15	25.896	-18304.8	-18330.7	0.960711	0.489981	175718
52.1	10.9155	188198	325.25	179555											52.1	325.25	31.5385	-18337	-18368.5	0.952371	0.487802	174937
52.2	10.8697	187408	325.35	178765											52.2	325.35	37.191	-18369.2	-18406.4	0.944094	0.485622	174155
52.3	10.8315	186750	325.45	178107											52.3	325.45	42.8533	-18401.4	-18444.2	0.93588	0.483439	173372
52.4	10.7889	186015	325.55	177372											52.4	325.55	48.5256	-18433.5	-18482.1	0.927728	0.481255	172589
52.5	10.7473	185298	325.65	176655											52.5	325.65	54.2077	-18465.7	-18519.9	0.919639	0.479069	171805
52.6	10.7077	184615	325.75	175972											52.6	325.75	59.8997	-18497.9	-18557.8	0.91161	0.476881	171020
52.7	10.6681	183933	325.85	175290											52.7	325.85	65.6016	-18530.1	-18595.7	0.903643	0.474691	170235
52.8	10.6241	183174	325.95	174531											52.8	325.95	71.3133	-18562.2	-18633.5	0.895737	0.472501	169449
52.9	10.5808	182428	326.05	173785											52.9	326.05	77.0349	-18594.4	-18671.4	0.887891	0.470308	168663
53	10.5343	181626	326.15	172982											53	326.15	82.7664	-18626.6	-18709.3	0.880105	0.468115	167877
53.1	10.4915	180889	326.25	172246											53.1	326.25	88.5078	-18658.8	-18747.3	0.872379	0.46592	167089
53.2	10.4442	180072	326.35	171429											53.2	326.35	94.259	-18690.9	-18785.2	0.864712	0.463724	166302
53.3	10.396	179241	326.45	170598											53.3	326.45	100.02	-18723.1	-18823.1	0.857104	0.461527	165514
53.4	10.3492	178434	326.55	169791											53.4	326.55	105.791	-18755.3	-18861.1	0.849555	0.459329	164726
53.5	10.3037	177649	326.65	169006											53.5	326.65	111.572	-18787.5	-18899	0.842064	0.457131	163937
53.6	10.2695	177060	326.75	168417											53.6	326.75	117.362	-18819.6	-18937	0.834631	0.454931	163149
53.7	10.2345	176456	326.85	167813											53.7	326.85	123.163	-18851.8	-18975	0.827256	0.452731	162360
53.8	10.1909	175705	326.95	167062											53.8	326.95	128.973	-18884	-19013	0.819937	0.450531	161570
53.9	10.1434	174887	327.05	166244											53.9	327.05	134.793	-18916.2	-19051	0.812676	0.448329	160781
54	10.0989	174119	327.15	165476											54	327.15	140.623	-18948.3	-19089	0.805471	0.446128	159992
54.1	10.0532	173331	327.25	164688											54.1	327.25	146.463	-18980.5	-19127	0.798322	0.443926	159202
54.2	10.0036	172476	327.35	163833											54.2	327.35	152.313	-19012.7	-19165	0.791229	0.441724	158412
54.3	9.96005	171725	327.45	163082											54.3	327.45	158.172	-19044.9	-19203	0.784192	0.439522	157623
54.4	9.91707	170984	327.55	162341											54.4	327.55	164.042	-19077	-19241.1	0.777209	0.43732	156833
54.5	9.87628	170281	327.65	161638											54.5	327.65	169.921	-19109.2	-19279.1	0.770282	0.435118	156043
54.6	9.8361	169588	327.75	160945											54.6	327.75	175.81	-19141.4	-19317.2	0.763408	0.432916	155254
54.7	9.79262	168838	327.85	160195											54.7	327.85	181.709	-19173.6	-19355.3	0.756589	0.430715	154464
54.8	9.74885	168084	327.95	159441											54.8	327.95	187.617	-19205.7	-19393.4	0.749824	0.428514	153675
54.9	9.70526	167332	328.05	158689											54.9	328.05	193.536	-19237.9	-19431.4	0.743112	0.426313	152886
55	9.66231	166592	328.15	157949											55	328.15	199.464	-19270.1	-19469.6	0.736453	0.424113	152097
55.1	9.61851	165836	328.25	157193											55.1	328.25	205.402	-19302.3	-19507.7	0.729846	0.421914	151308
55.2	9.57099	165017	328.35	156374											55.2	328.35	211.35	-19334.4	-19545.8	0.723292	0.419715	150519
55.3	9.52574	164237	328.45	155594											55.3	328.45	217.307	-19366.6	-19583.9	0.71679	0.417518	149731
55.4	9.48616	163555	328.55	154912											55.4	328.55	223.275	-19398.8	-19622.1	0.71034	0.415321	148943
55.5	9.44742	162887	328.65	154244											55.5	328.65	229.252	-19431	-19660.2	0.703941	0.413125	148156
55.6	9.40612	162175	328.75	153532											55.6	328.75	235.239	-19463.1	-19698.4	0.697593	0.410931	147369
55.7	9.36468	161460	328.85	152817											55.7	328.85	241.236	-19495.3	-19736.6	0.691296	0.408738	146583
55.8	9.32253	160733	328.95	152090											55.8	328.95	247.242	-19527.5	-19774.7	0.685049	0.406546	145796
55.9	9.28255	160044	329.05	151401											55.9	329.05	253.259	-19559.7	-19812.9	0.678853	0.404355	145011
56	9.24068	159322	329.15	150679											56	329.15	259.285	-19591.8	-19851.1	0.672706	0.402166	144226
56.1	9.19871	158598	329.25	149955											56.1	329.25	265.321	-19624	-19889.3	0.666608	0.399979	143441
56.2	9.16075	157944	329.35	149301											56.2	329.35	271.367	-19656.2	-19927.6	0.660559	0.397793	142658
56.3	9.12333	157299	329.45	148656											56.3	329.45	277.422	-19688.4	-19965.8	0.65456	0.39561	141875
56.4	9.08115	156572	329.55	147929											56.4	329.55	283.487	-19720.5	-20004	0.648608	0.393428	141092
56.5	9.03839	155834	329.65	147191											56.5	329.65	289.562	-19752.7	-20042.3	0.642705	0.391248	140310
56.6	8.99651	155112	329.75	146469											56.6	329.75	295.647	-19784.9	-20080.5	0.636849	0.38907	139529
56.7	8.95357	154372	329.85	145729											56.7	329.85	301.741	-19817.1	-20118.8	0.631041	0.386895	138749
56.8	8.91334	153678	329.95	145035											56.8	329.95	307.846	-19849.2	-20157.1	0.62528	0.384721	137970
56.9	8.86726	152884	330.05	144241											56.9	330.05	313.96	-19881.4	-20195.4	0.619566	0.382551	137191
57	8.8238	152134	330.15	143491											57	330.15	320.084	-19913.6	-20233.7	0.613898	0.380382	136414
57.1	8.78071	151392	330.25	142749											57.1	330.25	326.217	-19945.8	-20272	0.608277	0.378216	135637
57.2	8.73158	150545	330.35	141902											57.2	330.35	332.36	-19977.9	-20310.3	0.602701	0.376053	134861
57.3	8.68219	149693	330.45	141050											57.3	330.45	338.513	-20010.1	-20348.6	0.597171	0.373893	134086
57.4	8.638	148931	330.55	140288											57.4	330.55	344.676	-20042.3	-20387	0.591686	0.371736	133313
57.5	8.59102	148121	330.65	139478											57.5	330.65	350.848	-20074.5	-20425.3	0.586247	0.369581	132540
57.6	8.54537	147334	330.75	138691											57.6	330.75	357.031	-20106.7	-20463.7	0.580852	0.36743	131769
57.7	8.50277	146599	330.85	137956											57.7	330.85	363.223	-20138.8	-20502	0.575501	0.365281	130998
57.8	8.46085	145877	330.95	137234											57.8	330.95	369.424	-20171	-20540.4	0.570194	0.363136	130229
57.9	8.42222	145211	331.05	136568											57.9	331.05	375.636	-20203.2	-20578.8	0.564931	0.360994	129461
58	8.38051	144492	331.15	135849											58	331.15	381.857	-20235.4	-20617.2	0.559712	0.358856	128694
58.1	8.3363	143729	331.25	135086											58.1	331.25	388.087	-20267.5	-20655.6	0.554535	0.356721	127928
58.2	8.29182	142962	331.35	134319											58.2	331.35	394.328	-20299.7	-20694	0.549402	0.35459	127164
58.3	8.25009	142243	331.45	133600											58.3	331.45	400.578	-20331.9	-20732.5	0.544311	0.352462	126401
58.4	8.20603	141483	331.55	132840											58.4	331.55	406.838	-20364.1	-20770.9	0.539262	0.350338	125639
58.5	8.16708	140812	331.65	132169											58.5	331.65	413.108	-20396.2	-20809.3	0.534255	0.348218	124879
58.6	8.12945	140163	331.75	131520											58.6	331.75	419.387	-20428.4	-20847.8	0.52929	0.346102	124120
58.7	8.09146	139508	331.85	130865											58.7	331.85	425.676	-20460.6	-20886.3	0.524366	0.34399	123363
58.8	8.04423	138694	331.95	130051											58.8	331.95	431.975	-20492.8	-20924.7	0.519484	0.341882	122607
58.9	7.99529	137850	332.05	129207											58.9	332.05	438.283	-20524.9	-20963.2	0.514642	0.339778	121852
59	7.9514	137093	332.15	128450											59	332.15	444.601	-20557.1	-21001.7	0.509841	0.337679	121099
59.1	7.90927	136367	332.25	127724											59.1	332.25	450.929	-20589.3	-21040.2	0.50508	0.335583	120348
59.2	7.87033	135695	332.35	127052											59.2	332.35	457.267	-20621.5	-21078.7	0.500359	0.333493	119598
59.3	7.83093	135016	332.45	126373											59.3	332.45	463.614	-20653.6	-21117.2	0.495677	0.331407	118850
59.4	7.79687	134429	332.55	125786											59.4	332.55	469.971	-20685.8	-21155.8	0.491035	0.329325	118103
59.5	7.75292	133671	332.65	125028											59.5	332.65	476.337	-20718	-21194.3	0.486432	0.327248	117359
59.6	7.70006	132760	332.75	124117											59.6	332.75	482.713	-20750.2	-21232.9	0.481868	0.325176	116615
59.7	7.65641	132007	332.85	123364											59.7	332.85	489.099	-20782.3	-21271.4	0.477342	0.323109	115874
59.8	7.61546	131301	332.95	122658											59.8	332.95	495.495	-20814.5	-21310	0.472855	0.321047	115135
59.9	7.5658	130445	333.05	121802											59.9	333.05	501.9	-20846.7	-21348.6	0.468406	0.318989	114397
60	7.52966	129822	333.15	121179											60	333.15	508.315	-20878.9	-21387.2	0.463994	0.316937	113661
60.1	7.49259	129183	333.25	120540											60.1	333.25	514.739	-20911	-21425.8	0.45962	0.31489	112927
60.2	7.44577	128375	333.35	119732											60.2	333.35	521.174	-20943.2	-21464.4	0.455283	0.312849	112195
60.3	7.40136	127610	333.45	118967											60.3	333.45	527.617	-20975.4	-21503	0.450983	0.310812	111464
60.4	7.35948	126888	333.55	118245											60.4	333.55	534.071	-21007.6	-21541.6	0.44672	0.308781	110736
60.5	7.31382	126100	333.65	117457											60.5	333.65	540.534	-21039.7	-21580.3	0.442493	0.306756	110010
60.6	7.2683	125316	333.75	116673											60.6	333.75	547.007	-21071.9	-21618.9	0.438302	0.304736	109285
60.7	7.22799	124621	333.85	115978											60.7	333.85	553.489	-21104.1	-21657.6	0.434147	0.302721	108563
60.8	7.1827	123840	333.95	115197											60.8	333.95	559.981	-21136.3	-21696.2	0.430028	0.300713	107842
60.9	7.14675	123220	334.05	114577											60.9	334.05	566.483	-21168.4	-21734.9	0.425943	0.29871	107124
61	7.10662	122528	334.15	113885											61	334.15	572.994	-21200.6	-21773.6	0.421894	0.296713	106408
61.1	7.06585	121825	334.25	113182											61.1	334.25	579.515	-21232.8	-21812.3	0.41788	0.294722	105694
61.2	7.02379	121100	334.35	112457											61.2	334.35	586.046	-21265	-21851	0.413901	0.292737	104982
61.3	6.97956	120337	334.45	111694											61.3	334.45	592.586	-21297.1	-21889.7	0.409955	0.290758	104272
61.4	6.92994	119482	334.55	110839											61.4	334.55	599.136	-21329.3	-21928.5	0.406044	0.288785	103565
61.5	6.88653	118733	334.65	110090											61.5	334.65	605.695	-21361.5	-21967.2	0.402167	0.286818	102859
61.6	6.84882	118083	334.75	109440											61.6	334.75	612.264	-21393.7	-22005.9	0.398323	0.284858	102156
61.7	6.80906	117398	334.85	108755											61.7	334.85	618.843	-21425.8	-22044.7	0.394512	0.282903	101456
61.8	6.76667	116667	334.95	108024											61.8	334.95	625.431	-21458	-22083.5	0.390735	0.280956	100757
61.9	6.71973	115857	335.05	107214											61.9	335.05	632.029	-21490.2	-22122.2	0.38699	0.279014	100061
62	6.66395	114896	335.15	106253											62	335.15	638.636	-21522.4	-22161	0.383278	0.277079	99366.9
62.1	6.61354	114027	335.25	105384											62.1	335.25	645.253	-21554.5	-22199.8	0.379598	0.275151	98675.4
62.2	6.56954	113268	335.35	104625											62.2	335.35	651.88	-21586.7	-22238.6	0.37595	0.273229	97986.3
62.3	6.52974	112582	335.45	103939											62.3	335.45	658.516	-21618.9	-22277.4	0.372334	0.271315	97299.5
62.4	6.48701	111845	335.55	103202											62.4	335.55	665.162	-21651.1	-22316.2	0.36875	0.269406	96615.2
62.5	6.44827	111177	335.65	102534											62.5	335.65	671.818	-21683.2	-22355.1	0.365197	0.267505	95933.3
62.6	6.40554	110440	335.75	101797											62.6	335.75	678.483	-21715.4	-22393.9	0.361675	0.26561	95253.9
62.7	6.36212	109692	335.85	101049											62.7	335.85	685.157	-21747.6	-22432.8	0.358184	0.263723	94577
62.8	6.31141	108817	335.95	100174											62.8	335.95	691.841	-21779.8	-22471.6	0.354724	0.261842	93902.5
62.9	6.25925	107918	336.05	99275.1											62.9	336.05	698.535	-21812	-22510.5	0.351294	0.259969	93230.6
63	6.21573	107168	336.15	98524.8											63	336.15	705.238	-21844.1	-22549.4	0.347894	0.258102	92561.2
63.1	6.16921	106366	336.25	97722.7											63.1	336.25	711.951	-21876.3	-22588.3	0.344524	0.256243	91894.4
63.2	6.13032	105695	336.35	97052.1											63.2	336.35	718.674	-21908.5	-22627.2	0.341184	0.25439	91230.1
63.3	6.09381	105066	336.45	96422.8											63.3	336.45	725.406	-21940.7	-22666.1	0.337874	0.252545	90568.5
63.4	6.04473	104219	336.55	95576.5											63.4	336.55	732.148	-21972.8	-22705	0.334593	0.250708	89909.5
63.5	5.99786	103411	336.65	94768.5											63.5	336.65	738.899	-22005	-22743.9	0.331341	0.248877	89253.1
63.6	5.95379	102652	336.75	94008.6											63.6	336.75	745.659	-22037.2	-22782.8	0.328117	0.247054	88599.3
63.7	5.91446	101973	336.85	93330.4											63.7	336.85	752.43	-22069.4	-22821.8	0.324922	0.245239	87948.2
63.8	5.87699	101327	336.95	92684.4											63.8	336.95	759.21	-22101.5	-22860.7	0.321756	0.243431	87299.8
63.9	5.83919	100676	337.05	92032.7											63.9	337.05	765.999	-22133.7	-22899.7	0.318618	0.24163	86654
64	5.79605	99932	337.15	91289											64	337.15	772.798	-22165.9	-22938.7	0.315508	0.239837	86011
64.1	5.74866	99114.9	337.25	90471.9											64.1	337.25	779.606	-22198.1	-22977.7	0.312425	0.238052	85370.7
64.2	5.70667	98390.8	337.35	89747.8											64.2	337.35	786.424	-22230.2	-23016.7	0.30937	0.236274	84733.2
64.3	5.66346	97645.9	337.45	89002.9											64.3	337.45	793.252	-22262.4	-23055.7	0.306342	0.234504	84098.4
64.4	5.62166	96925.2	337.55	88282.2											64.4	337.55	800.089	-22294.6	-23094.7	0.303342	0.232742	83466.4
64.5	5.58628	96315.2	337.65	87672.2											64.5	337.65	806.936	-22326.8	-23133.7	0.300368	0.230987	82837.1
64.6	5.54712	95640	337.75	86997											64.6	337.75	813.792	-22358.9	-23172.7	0.297421	0.22924	82210.7
64.7	5.50469	94908.5	337.85	86265.5											64.7	337.85	820.657	-22391.1	-23211.8	0.2945	0.227501	81587
64.8	5.46784	94273.2	337.95	85630.2											64.8	337.95	827.533	-22423.3	-23250.8	0.291606	0.22577	80966.2
64.9	5.43344	93680.1	338.05	85037.1											64.9	338.05	834.417	-22455.5	-23289.9	0.288738	0.224047	80348.3
65	5.39498	93016.8	338.15	84373.8											65	338.15	841.312	-22487.6	-23328.9	0.285895	0.222332	79733.1
65.1	5.35068	92253.2	338.25	83610.2											65.1	338.25	848.215	-22519.8	-23368	0.283078	0.220624	79120.8
65.2	5.30725	91504.3	338.35	82861.3											65.2	338.35	855.129	-22552	-23407.1	0.280287	0.218925	78511.4
65.3	5.26543	90783.2	338.45	82140.2											65.3	338.45	862.051	-22584.2	-23446.2	0.277521	0.217234	77904.9
65.4	5.226	90103.4	338.55	81460.4											65.4	338.55	868.984	-22616.3	-23485.3	0.274779	0.21555	77301.3
65.5	5.18631	89419.2	338.65	80776.2											65.5	338.65	875.925	-22648.5	-23524.4	0.272063	0.213875	76700.5
65.6	5.14979	88789.5	338.75	80146.5											65.6	338.75	882.877	-22680.7	-23563.6	0.269371	0.212208	76102.7
65.7	5.11187	88135.6	338.85	79492.6											65.7	338.85	889.837	-22712.9	-23602.7	0.266704	0.21055	75507.8
65.8	5.07406	87483.8	338.95	78840.8											65.8	338.95	896.808	-22745	-23641.8	0.264061	0.208899	74915.8
65.9	5.03228	86763.4	339.05	78120.4											65.9	339.05	903.788	-22777.2	-23681	0.261442	0.207256	74326.8
66	4.99181	86065.7	339.15	77422.7											66	339.15	910.777	-22809.4	-23720.2	0.258847	0.205622	73740.7
66.1	4.95487	85428.8	339.25	76785.8											66.1	339.25	917.776	-22841.6	-23759.3	0.256275	0.203996	73157.6
66.2	4.9191	84812.1	339.35	76169.1											66.2	339.35	924.784	-22873.7	-23798.5	0.253727	0.202378	72577.4
66.3	4.88486	84221.8	339.45	75578.8											66.3	339.45	931.801	-22905.9	-23837.7	0.251202	0.200769	72000.2
66.4	4.84779	83582.5	339.55	74939.5											66.4	339.55	938.829	-22938.1	-23876.9	0.248701	0.199168	71426
66.5	4.81214	82967.8	339.65	74324.8											66.5	339.65	945.865	-22970.3	-23916.1	0.246222	0.197575	70854.8
66.6	4.77066	82252.8	339.75	73609.8											66.6	339.75	952.911	-23002.4	-23955.4	0.243766	0.19599	70286.5
66.7	4.72382	81445.1	339.85	72802.1											66.7	339.85	959.967	-23034.6	-23994.6	0.241332	0.194414	69721.3
66.8	4.6821	80725.8	339.95	72082.8											66.8	339.95	967.032	-23066.8	-24033.8	0.238921	0.192846	69159
66.9	4.63182	79859	340.05	71216											66.9	340.05	974.107	-23099	-24073.1	0.236532	0.191287	68599.8
67	4.59273	79185	340.15	70542											67	340.15	981.191	-23131.1	-24112.3	0.234165	0.189736	68043.6
67.1	4.55612	78553.9	340.25	69910.9											67.1	340.25	988.284	-23163.3	-24151.6	0.23182	0.188193	67490.4
67.2	4.50878	77737.6	340.35	69094.6											67.2	340.35	995.387	-23195.5	-24190.9	0.229497	0.186659	66940.2
67.3	4.45977	76892.7	340.45	68249.7											67.3	340.45	1002.5	-23227.7	-24230.2	0.227195	0.185133	66393
67.4	4.41773	76167.7	340.55	67524.7											67.4	340.55	1009.62	-23259.8	-24269.5	0.224914	0.183616	65848.9
67.5	4.37253	75388.4	340.65	66745.4											67.5	340.65	1016.75	-23292	-24308.8	0.222654	0.182107	65307.8
67.6	4.32929	74642.9	340.75	65999.9											67.6	340.75	1023.89	-23324.2	-24348.1	0.220416	0.180607	64769.7
67.7	4.29062	73976.2	340.85	65333.2											67.7	340.85	1031.04	-23356.4	-24387.4	0.218198	0.179115	64234.7
67.8	4.24976	73271.7	340.95	64628.7											67.8	340.95	1038.2	-23388.6	-24426.8	0.216	0.177632	63702.7
67.9	4.2111	72605.2	341.05	63962.2											67.9	341.05	1045.37	-23420.7	-24466.1	0.213823	0.176157	63173.8
68	4.17395	71964.7	341.15	63321.7											68	341.15	1052.55	-23452.9	-24505.5	0.211666	0.17469	62647.9
68.1	4.13635	71316.4	341.25	62673.4											68.1	341.25	1059.74	-23485.1	-24544.8	0.20953	0.173232	62125.1
68.2	4.09702	70638.3	341.35	61995.3											68.2	341.35	1066.94	-23517.3	-24584.2	0.207413	0.171783	61605.3
68.3	4.066	70103.5	341.45	61460.5											68.3	341.45	1074.14	-23549.4	-24623.6	0.205316	0.170342	61088.5
68.4	4.03739	69610.2	341.55	60967.2											68.4	341.55	1081.36	-23581.6	-24663	0.203239	0.16891	60574.9
68.5	4.01121	69158.7	341.65	60515.7											68.5	341.65	1088.58	-23613.8	-24702.4	0.201181	0.167486	60064.2
68.6	3.97901	68603.7	341.75	59960.7											68.6	341.75	1095.82	-23646	-24741.8	0.199142	0.166071	59556.6
68.7	3.94116	67951.1	341.85	59308.1											68.7	341.85	1103.06	-23678.1	-24781.2	0.197123	0.164664	59052.1
68.8	3.90667	67356.5	341.95	58713.5											68.8	341.95	1110.32	-23710.3	-24820.6	0.195122	0.163265	58550.6
68.9	3.87047	66732.3	342.05	58089.3											68.9	342.05	1117.58	-23742.5	-24860.1	0.19314	0.161875	58052.2
69	3.83767	66166.7	342.15	57523.7											69	342.15	1124.85	-23774.7	-24899.5	0.191177	0.160494	57556.8
69.1	3.80408	65587.6	342.25	56944.6											69.1	342.25	1132.14	-23806.8	-24939	0.189232	0.159121	57064.5
69.2	3.7701	65001.8	342.35	56358.8											69.2	342.35	1139.43	-23839	-24978.4	0.187306	0.157757	56575.2
69.3	3.73296	64361.3	342.45	55718.3											69.3	342.45	1146.73	-23871.2	-25017.9	0.185397	0.156401	56088.9
69.4	3.6972	63744.8	342.55	55101.8											69.4	342.55	1154.04	-23903.4	-25057.4	0.183507	0.155054	55605.7
69.5	3.66307	63156.3	342.65	54513.3											69.5	342.65	1161.36	-23935.5	-25096.9	0.181635	0.153715	55125.6
69.6	3.62527	62504.6	342.75	53861.6											69.6	342.75	1168.69	-23967.7	-25136.4	0.17978	0.152384	54648.4
69.7	3.58876	61875.1	342.85	53232.1											69.7	342.85	1176.03	-23999.9	-25175.9	0.177943	0.151062	54174.3
69.8	3.55085	61221.5	342.95	52578.5											69.8	342.95	1183.37	-24032.1	-25215.4	0.176123	0.149749	53703.3
69.9	3.51246	60559.7	343.05	51916.7											69.9	343.05	1190.73	-24064.2	-25255	0.17432	0.148444	53235.2
70	3.4768	59944.9	343.15	51301.9											70	343.15	1198.1	-24096.4	-25294.5	0.172535	0.147147	52770.2
70.1	3.44258	59354.9	343.25	50711.9											70.1	343.25	1205.47	-24128.6	-25334.1	0.170767	0.145859	52308.2
70.2	3.40912	58777.9	343.35	50134.9											70.2	343.35	1212.86	-24160.8	-25373.6	0.169015	0.144579	51849.3
70.3	3.37844	58249	343.45	49606											70.3	343.45	1220.25	-24192.9	-25413.2	0.16728	0.143308	51393.3
70.4	3.34674	57702.4	343.55	49059.4											70.4	343.55	1227.66	-24225.1	-25452.8	0.165562	0.142044	50940.3
70.5	3.32019	57244.6	343.65	48601.6											70.5	343.65	1235.07	-24257.3	-25492.4	0.16386	0.14079	50490.4
70.6	3.29236	56764.9	343.75	48121.9											70.6	343.75	1242.49	-24289.5	-25532	0.162174	0.139543	50043.4
70.7	3.26636	56316.5	343.85	47673.5											70.7	343.85	1249.93	-24321.6	-25571.6	0.160504	0.138305	49599.5
70.8	3.24032	55867.5	343.95	47224.5											70.8	343.95	1257.37	-24353.8	-25611.2	0.15885	0.137076	49158.5
70.9	3.20555	55268.1	344.05	46625.1											70.9	344.05	1264.82	-24386	-25650.8	0.157213	0.135854	48720.5
71	3.16563	54579.9	344.15	45936.9											71	344.15	1272.28	-24418.2	-25690.4	0.15559	0.134641	48285.5
71.1	3.13074	53978.2	344.25	45335.2											71.1	344.25	1279.75	-24450.3	-25730.1	0.153984	0.133437	47853.4
71.2	3.09798	53413.5	344.35	44770.5											71.2	344.35	1287.23	-24482.5	-25769.7	0.152393	0.13224	47424.3
71.3	3.06782	52893.4	344.45	44250.4											71.3	344.45	1294.71	-24514.7	-25809.4	0.150817	0.131052	46998.2
71.4	3.03918	52399.6	344.55	43756.6											71.4	344.55	1302.21	-24546.9	-25849.1	0.149256	0.129872	46575
71.5	3.01191	51929.5	344.65	43286.5											71.5	344.65	1309.72	-24579	-25888.8	0.14771	0.1287	46154.7
71.6	2.98513	51467.8	344.75	42824.8											71.6	344.75	1317.24	-24611.2	-25928.5	0.146179	0.127536	45737.4
71.7	2.9466	50803.4	344.85	42160.4											71.7	344.85	1324.76	-24643.4	-25968.2	0.144663	0.126381	45323
71.8	2.91775	50306	344.95	41663											71.8	344.95	1332.3	-24675.6	-26007.9	0.143162	0.125233	44911.5
71.9	2.88976	49823.4	345.05	41180.4											71.9	345.05	1339.84	-24707.7	-26047.6	0.141675	0.124094	44502.9
72	2.85981	49307	345.15	40664											72	345.15	1347.39	-24739.9	-26087.3	0.140203	0.122963	44097.3
72.1	2.83245	48835.3	345.25	40192.3											72.1	345.25	1354.96	-24772.1	-26127.1	0.138744	0.12184	43694.5
72.2	2.80378	48341	345.35	39698											72.2	345.35	1362.53	-24804.3	-26166.8	0.1373	0.120725	43294.6
72.3	2.77699	47879.1	345.45	39236.1											72.3	345.45	1370.11	-24836.4	-26206.6	0.13587	0.119618	42897.6
72.4	2.74765	47373.3	345.55	38730.3											72.4	345.55	1377.7	-24868.6	-26246.3	0.134454	0.118519	42503.5
72.5	2.72207	46932.3	345.65	38289.3											72.5	345.65	1385.3	-24900.8	-26286.1	0.133052	0.117428	42112.2
72.6	2.69465	46459.5	345.75	37816.5											72.6	345.75	1392.91	-24933	-26325.9	0.131663	0.116344	41723.8
72.7	2.66494	45947.2	345.85	37304.2											72.7	345.85	1400.53	-24965.1	-26365.7	0.130287	0.115269	41338.2
72.8	2.63378	45410	345.95	36767											72.8	345.95	1408.16	-24997.3	-26405.5	0.128926	0.114202	40955.4
72.9	2.6075	44956.9	346.05	36313.9											72.9	346.05	1415.8	-25029.5	-26445.3	0.127577	0.113143	40575.5
73	2.5776	44441.4	346.15	35798.4											73	346.15	1423.44	-25061.7	-26485.1	0.126242	0.112091	40198.4
73.1	2.55744	44093.7	346.25	35450.7											73.1	346.25	1431.1	-25093.9	-26524.9	0.124919	0.111047	39824
73.2	2.53196	43654.4	346.35	35011.4											73.2	346.35	1438.76	-25126	-26564.8	0.12361	0.110011	39452.5
73.3	2.50788	43239.3	346.45	34596.3											73.3	346.45	1446.44	-25158.2	-26604.6	0.122313	0.108983	39083.8
73.4	2.48429	42832.7	346.55	34189.7											73.4	346.55	1454.12	-25190.4	-26644.5	0.121029	0.107963	38717.8
73.5	2.45966	42407.9	346.65	33764.9											73.5	346.65	1461.82	-25222.6	-26684.4	0.119758	0.10695	38354.6
73.6	2.43416	41968.3	346.75	33325.3											73.6	346.75	1469.52	-25254.7	-26724.2	0.118499	0.105945	37994.2
73.7	2.40323	41435	346.85	32792											73.7	346.85	1477.23	-25286.9	-26764.1	0.117253	0.104947	37636.4
73.8	2.37322	40917.6	346.95	32274.6											73.8	346.95	1484.95	-25319.1	-26804	0.116018	0.103957	37281.5
73.9	2.34732	40471	347.05	31828											73.9	347.05	1492.68	-25351.3	-26843.9	0.114796	0.102975	36929.2
74	2.32553	40095.3	347.15	31452.3											74	347.15	1500.42	-25383.4	-26883.9	0.113586	0.102	36579.6
74.1	2.2975	39612.1	347.25	30969.1											74.1	347.25	1508.17	-25415.6	-26923.8	0.112388	0.101033	36232.8
74.2	2.27737	39265.1	347.35	30622.1											74.2	347.35	1515.93	-25447.8	-26963.7	0.111202	0.100073	35888.6
74.3	2.25687	38911.6	347.45	30268.6											74.3	347.45	1523.69	-25480	-27003.7	0.110027	0.0991212	35547.1
74.4	2.23395	38516.4	347.55	29873.4											74.4	347.55	1531.47	-25512.1	-27043.6	0.108864	0.0981764	35208.3
74.5	2.21333	38160.8	347.65	29517.8											74.5	347.65	1539.26	-25544.3	-27083.6	0.107713	0.097239	34872.1
74.6	2.18435	37661.1	347.75	29018.1											74.6	347.75	1547.05	-25576.5	-27123.5	0.106573	0.0963089	34538.6
74.7	2.15795	37206.1	347.85	28563.1											74.7	347.85	1554.86	-25608.7	-27163.5	0.105444	0.0953862	34207.6
74.8	2.12916	36709.6	347.95	28066.6											74.8	347.95	1562.67	-25640.8	-27203.5	0.104327	0.0944708	33879.4
74.9	2.10225	36245.8	348.05	27602.8											74.9	348.05	1570.49	-25673	-27243.5	0.10322	0.0935626	33553.7
75	2.08528	35953.1	348.15	27310.1											75	348.15	1578.32	-25705.2	-27283.5	0.102125	0.0926616	33230.6
75.1	2.05784	35479.9	348.25	26836.9											75.1	348.25	1586.17	-25737.4	-27323.5	0.10104	0.0917679	32910
75.2	2.03661	35114	348.35	26471											75.2	348.35	1594.02	-25769.5	-27363.6	0.0999664	0.0908813	32592.1
75.3	2.01257	34699.5	348.45	26056.5											75.3	348.45	1601.88	-25801.7	-27403.6	0.0989033	0.0900018	32276.7
75.4	1.99522	34400.4	348.55	25757.4											75.4	348.55	1609.75	-25833.9	-27443.6	0.0978509	0.0891295	31963.8
75.5	1.96684	33911.1	348.65	25268.1											75.5	348.65	1617.62	-25866.1	-27483.7	0.0968089	0.0882641	31653.5
75.6	1.94692	33567.6	348.75	24924.6											75.6	348.75	1625.51	-25898.2	-27523.7	0.0957773	0.0874058	31345.7
75.7	1.92845	33249.2	348.85	24606.2											75.7	348.85	1633.41	-25930.4	-27563.8	0.0947561	0.0865545	31040.4
75.8	1.90521	32848.5	348.95	24205.5											75.8	348.95	1641.31	-25962.6	-27603.9	0.0937451	0.0857102	30737.6
75.9	1.88194	32447.3	349.05	23804.3											75.9	349.05	1649.23	-25994.8	-27644	0.0927442	0.0848727	30437.3
76	1.8598	32065.5	349.15	23422.5											76	349.15	1657.15	-26026.9	-27684.1	0.0917533	0.0840422	30139.4
76.1	1.83495	31637	349.25	22994											76.1	349.25	1665.09	-26059.1	-27724.2	0.0907724	0.0832185	29844
76.2	1.8159	31308.6	349.35	22665.6											76.2	349.35	1673.03	-26091.3	-27764.3	0.0898013	0.0824016	29551.1
76.3	1.78947	30852.9	349.45	22209.9											76.3	349.45	1680.98	-26123.5	-27804.4	0.08884	0.0815914	29260.5
76.4	1.76263	30390.2	349.55	21747.2											76.4	349.55	1688.94	-26155.6	-27844.6	0.0878884	0.080788	28972.4
76.5	1.74214	30037	349.65	21394											76.5	349.65	1696.91	-26187.8	-27884.7	0.0869463	0.0799913	28686.7
76.6	1.72248	29698	349.75	21055											76.6	349.75	1704.89	-26220	-27924.9	0.0860137	0.0792013	28403.4
76.7	1.69433	29212.5	349.85	20569.5											76.7	349.85	1712.88	-26252.2	-27965.1	0.0850905	0.0784179	28122.4
76.8	1.67467	28873.7	349.95	20230.7											76.8	349.95	1720.88	-26284.3	-28005.2	0.0841767	0.0776411	27843.8
76.9	1.64555	28371.6	350.05	19728.6											76.9	350.05	1728.89	-26316.5	-28045.4	0.083272	0.0768708	27567.6
77	1.62174	27961.1	350.15	19318.1											77	350.15	1736.9	-26348.7	-28085.6	0.0823765	0.0761071	27293.7
77.1	1.59748	27542.7	350.25	18899.7											77.1	350.25	1744.93	-26380.9	-28125.8	0.0814901	0.0753498	27022.1
77.2	1.5782	27210.4	350.35	18567.4											77.2	350.35	1752.96	-26413	-28166	0.0806126	0.074599	26752.9
77.3	1.56671	27012.2	350.45	18369.2											77.3	350.45	1761.01	-26445.2	-28206.2	0.079744	0.0738546	26485.9
77.4	1.54462	26631.3	350.55	17988.3											77.4	350.55	1769.06	-26477.4	-28246.5	0.0788843	0.0731165	26221.2
77.5	1.52059	26217.1	350.65	17574.1											77.5	350.65	1777.12	-26509.6	-28286.7	0.0780332	0.0723848	25958.8
77.6	1.50698	25982.5	350.75	17339.5											77.6	350.75	1785.2	-26541.7	-28326.9	0.0771908	0.0716594	25698.7
77.7	1.49422	25762.5	350.85	17119.5											77.7	350.85	1793.28	-26573.9	-28367.2	0.076357	0.0709402	25440.7
77.8	1.47839	25489.5	350.95	16846.5											77.8	350.95	1801.37	-26606.1	-28407.5	0.0755316	0.0702272	25185.1
77.9	1.46707	25294.3	351.05	16651.3											77.9	351.05	1809.46	-26638.3	-28447.7	0.0747146	0.0695204	24931.6
78	1.44737	24954.6	351.15	16311.6											78	351.15	1817.57	-26670.4	-28488	0.073906	0.0688198	24680.3
78.1	1.43325	24711.3	351.25	16068.3											78.1	351.25	1825.69	-26702.6	-28528.3	0.0731056	0.0681253	24431.3
78.2	1.41364	24373	351.35	15730											78.2	351.35	1833.82	-26734.8	-28568.6	0.0723134	0.0674368	24184.4
78.3	1.40322	24193.5	351.45	15550.5											78.3	351.45	1841.95	-26767	-28608.9	0.0715292	0.0667544	23939.6
78.4	1.38464	23873.1	351.55	15230.1											78.4	351.55	1850.1	-26799.2	-28649.2	0.0707531	0.0660779	23697
78.5	1.36826	23590.6	351.65	14947.6											78.5	351.65	1858.25	-26831.3	-28689.6	0.0699849	0.0654074	23456.6
78.6	1.34711	23226.1	351.75	14583.1											78.6	351.75	1866.41	-26863.5	-28729.9	0.0692246	0.0647428	23218.2
78.7	1.32261	22803.7	351.85	14160.7											78.7	351.85	1874.59	-26895.7	-28770.3	0.0684721	0.0640841	22982
78.8	1.30685	22532	351.95	13889											78.8	351.95	1882.77	-26927.9	-28810.6	0.0677273	0.0634313	22747.9
78.9	1.29236	22282	352.05	13639											78.9	352.05	1890.96	-26960	-28851	0.0669901	0.0627842	22515.8
79	1.29323	22297.1	352.15	13654.1											79	352.15	1899.16	-26992.2	-28891.4	0.0662605	0.0621429	22285.8
79.1	1.27982	22065.8	352.25	13422.8											79.1	352.25	1907.37	-27024.4	-28931.7	0.0655384	0.0615073	22057.9
79.2	1.26299	21775.8	352.35	13132.8											79.2	352.35	1915.59	-27056.6	-28972.1	0.0648237	0.0608774	21832
79.3	1.24395	21447.4	352.45	12804.4											79.3	352.45	1923.81	-27088.7	-29012.5	0.0641164	0.0602532	21608.2
79.4	1.23013	21209.1	352.55	12566.1											79.4	352.55	1932.05	-27120.9	-29053	0.0634164	0.0596346	21386.3
79.5	1.21633	20971.2	352.65	12328.2											79.5	352.65	1940.29	-27153.1	-29093.4	0.0627236	0.0590215	21166.5
79.6	1.20524	20780	352.75	12137											79.6	352.75	1948.55	-27185.3	-29133.8	0.0620379	0.058414	20948.6
79.7	1.19366	20580.3	352.85	11937.3											79.7	352.85	1956.81	-27217.4	-29174.2	0.0613593	0.057812	20732.7
79.8	1.17871	20322.6	352.95	11679.6											79.8	352.95	1965.08	-27249.6	-29214.7	0.0606877	0.0572155	20518.8
79.9	1.15788	19963.4	353.05	11320.4											79.9	353.05	1973.37	-27281.8	-29255.2	0.0600231	0.0566243	20306.8
80	1.13579	19582.6	353.15	10939.6											80	353.15	1981.66	-27314	-29295.6	0.0593654	0.0560386	20096.7
80.1	1.11499	19224	353.25	10581											80.1	353.25	1989.96	-27346.1	-29336.1	0.0587144	0.0554582	19888.6
80.2	1.09541	18886.3	353.35	10243.3											80.2	353.35	1998.27	-27378.3	-29376.6	0.0580702	0.0548831	19682.3
80.3	1.07797	18585.7	353.45	9942.74											80.3	353.45	2006.59	-27410.5	-29417.1	0.0574327	0.0543133	19478
80.4	1.06517	18365	353.55	9721.95											80.4	353.55	2014.91	-27442.7	-29457.6	0.0568018	0.0537488	19275.5
80.5	1.04868	18080.7	353.65	9437.66											80.5	353.65	2023.25	-27474.8	-29498.1	0.0561775	0.0531894	19074.9
80.6	1.03587	17859.8	353.75	9216.82											80.6	353.75	2031.59	-27507	-29538.6	0.0555596	0.0526352	18876.2
80.7	1.02112	17605.5	353.85	8962.48											80.7	353.85	2039.95	-27539.2	-29579.1	0.0549482	0.0520862	18679.3
80.8	1.00725	17366.4	353.95	8723.36											80.8	353.95	2048.31	-27571.4	-29619.7	0.0543431	0.0515422	18484.2
80.9	1.00259	17286	354.05	8642.96											80.9	354.05	2056.69	-27603.5	-29660.2	0.0537444	0.0510032	18290.9
81	0.981055	16914.7	354.15	8271.73											81	354.15	2065.07	-27635.7	-29700.8	0.0531519	0.0504693	18099.4
81.1	0.969138	16709.3	354.25	8066.27											81.1	354.25	2073.46	-27667.9	-29741.3	0.0525655	0.0499404	17909.8
81.2	0.958253	16521.6	354.35	7878.6											81.2	354.35	2081.86	-27700.1	-29781.9	0.0519853	0.0494164	17721.8
81.3	0.945705	16305.3	354.45	7662.25											81.3	354.45	2090.27	-27732.2	-29822.5	0.0514112	0.0488973	17535.7
81.4	0.932334	16074.7	354.55	7431.73											81.4	354.55	2098.69	-27764.4	-29863.1	0.0508431	0.0483831	17351.3
81.5	0.91908	15846.2	354.65	7203.21											81.5	354.65	2107.11	-27796.6	-29903.7	0.0502809	0.0478737	17168.6
81.6	0.903368	15575.3	354.75	6932.32											81.6	354.75	2115.55	-27828.8	-29944.3	0.0497246	0.0473692	16987.6
81.7	0.887325	15298.7	354.85	6655.71											81.7	354.85	2124	-27860.9	-29984.9	0.0491741	0.0468693	16808.4
81.8	0.87446	15076.9	354.95	6433.89											81.8	354.95	2132.45	-27893.1	-30025.6	0.0486294	0.0463742	16630.9
81.9	0.86566	14925.2	355.05	6282.17											81.9	355.05	2140.91	-27925.3	-30066.2	0.0480904	0.0458838	16455
82	0.859559	14820	355.15	6176.98											82	355.15	2149.39	-27957.5	-30106.9	0.0475571	0.0453981	16280.8
82.1	0.847614	14614	355.25	5971.03											82.1	355.25	2157.87	-27989.6	-30147.5	0.0470294	0.044917	16108.2
82.2	0.83241	14351.9	355.35	5708.9											82.2	355.35	2166.36	-28021.8	-30188.2	0.0465072	0.0444404	15937.3
82.3	0.814863	14049.4	355.45	5406.36											82.3	355.45	2174.86	-28054	-30228.9	0.0459906	0.0439684	15768.1
82.4	0.79593	13722.9	355.55	5079.93											82.4	355.55	2183.37	-28086.2	-30269.5	0.0454793	0.0435009	15600.4
82.5	0.785455	13542.3	355.65	4899.33											82.5	355.65	2191.89	-28118.3	-30310.2	0.0449735	0.0430379	15434.4
82.6	0.774272	13349.5	355.75	4706.52											82.6	355.75	2200.41	-28150.5	-30350.9	0.044473	0.0425794	15269.9
82.7	0.760366	13109.8	355.85	4466.77											82.7	355.85	2208.95	-28182.7	-30391.6	0.0439778	0.0421252	15107.1
82.8	0.748339	12902.4	355.95	4259.4											82.8	355.95	2217.49	-28214.9	-30432.4	0.0434878	0.0416754	14945.8
82.9	0.740251	12763	356.05	4119.96											82.9	356.05	2226.05	-28247	-30473.1	0.043003	0.04123	14786
83	0.735434	12679.9	356.15	4036.9											83	356.15	2234.61	-28279.2	-30513.8	0.0425233	0.0407889	14627.8
83.1	0.723464	12473.5	356.25	3830.52											83.1	356.25	2243.18	-28311.4	-30554.6	0.0420487	0.040352	14471.1
83.2	0.707429	12197	356.35	3554.04											83.2	356.35	2251.76	-28343.6	-30595.3	0.0415792	0.0399194	14316
83.3	0.692677	11942.7	356.45	3299.7											83.3	356.45	2260.36	-28375.8	-30636.1	0.0411146	0.0394909	14162.3
83.4	0.676051	11656.1	356.55	3013.05											83.4	356.55	2268.95	-28407.9	-30676.9	0.0406549	0.0390667	14010.2
83.5	0.666798	11496.5	356.65	2853.51											83.5	356.65	2277.56	-28440.1	-30717.7	0.0402002	0.0386466	13859.5
83.6	0.656752	11323.3	356.75	2680.3											83.6	356.75	2286.18	-28472.3	-30758.5	0.0397502	0.0382305	13710.3
83.7	0.643194	11089.5	356.85	2446.55											83.7	356.85	2294.81	-28504.5	-30799.3	0.0393051	0.0378186	13562.6
83.8	0.633958	10930.3	356.95	2287.31											83.8	356.95	2303.44	-28536.6	-30840.1	0.0388646	0.0374107	13416.3
83.9	0.620303	10694.9	357.05	2051.87											83.9	357.05	2312.09	-28568.8	-30880.9	0.0384289	0.0370068	13271.5
84	0.607359	10471.7	357.15	1828.71											84	357.15	2320.74	-28601	-30921.7	0.0379978	0.0366068	13128
84.1	0.601391	10368.8	357.25	1725.8											84.1	357.25	2329.4	-28633.2	-30962.6	0.0375713	0.0362108	12986
84.2	0.592957	10223.4	357.35	1580.39											84.2	357.35	2338.07	-28665.3	-31003.4	0.0371494	0.0358187	12845.4
84.3	0.581495	10025.8	357.45	1382.78											84.3	357.45	2346.75	-28697.5	-31044.3	0.0367319	0.0354305	12706.2
84.4	0.573899	9894.81	357.55	1251.81											84.4	357.55	2355.44	-28729.7	-31085.1	0.0363189	0.0350461	12568.3
84.5	0.561721	9684.84	357.65	1041.84											84.5	357.65	2364.14	-28761.9	-31126	0.0359104	0.0346655	12431.8
84.6	0.549593	9475.75	357.75	832.75											84.6	357.75	2372.85	-28794	-31166.9	0.0355062	0.0342887	12296.7
84.7	0.53636	9247.58	357.85	604.581											84.7	357.85	2381.57	-28826.2	-31207.8	0.0351063	0.0339157	12162.9
84.8	0.525964	9068.35	357.95	425.347											84.8	357.95	2390.29	-28858.4	-31248.7	0.0347107	0.0335463	12030.5
84.9	0.510139	8795.5	358.05	152.503											84.9	358.05	2399.03	-28890.6	-31289.6	0.0343194	0.0331807	11899.3
85	0.497344	8574.89	358.15	-68.1072											85	358.15	2407.77	-28922.7	-31330.5	0.0339323	0.0328186	11769.5
85.1	0.48781	8410.52	358.25	-232.484											85.1	358.25	2416.52	-28954.9	-31371.4	0.0335493	0.0324603	11641
85.2	0.471044	8121.45	358.35	-521.555											85.2	358.35	2425.28	-28987.1	-31412.4	0.0331704	0.0321055	11513.7
85.3	0.458916	7912.35	358.45	-730.654											85.3	358.45	2434.05	-29019.3	-31453.3	0.0327956	0.0317542	11387.8
85.4	0.447436	7714.41	358.55	-928.586											85.4	358.55	2442.83	-29051.4	-31494.3	0.0324248	0.0314065	11263.1
85.5	0.43292	7464.13	358.65	-1178.87											85.5	358.65	2451.62	-29083.6	-31535.2	0.0320581	0.0310623	11139.6
85.6	0.422937	7292.01	358.75	-1350.99											85.6	358.75	2460.42	-29115.8	-31576.2	0.0316952	0.0307215	11017.4
85.7	0.410374	7075.41	358.85	-1567.59											85.7	358.85	2469.22	-29148	-31617.2	0.0313363	0.0303842	10896.5
85.8	0.394243	6797.3	358.95	-1845.7											85.8	358.95	2478.04	-29180.1	-31658.2	0.0309813	0.0300503	10776.7
85.9	0.379604	6544.9	359.05	-2098.1											85.9	359.05	2486.86	-29212.3	-31699.2	0.0306301	0.0297198	10658.2
86	0.371575	6406.47	359.15	-2236.53											86	359.15	2495.7	-29244.5	-31740.2	0.0302827	0.0293926	10540.8
86.1	0.366642	6321.41	359.25	-2321.59											86.1	359.25	2504.54	-29276.7	-31781.2	0.029939	0.0290687	10424.7
86.2	0.351046	6052.52	359.35	-2590.48											86.2	359.35	2513.39	-29308.8	-31822.2	0.0295991	0.0287481	10309.7
86.3	0.344167	5933.91	359.45	-2709.09											86.3	359.45	2522.25	-29341	-31863.3	0.0292628	0.0284308	10195.9
86.4	0.346411	5972.6	359.55	-2670.4											86.4	359.55	2531.12	-29373.2	-31904.3	0.0289302	0.0281167	10083.3
86.5	0.340873	5877.13	359.65	-2765.87											86.5	359.65	2540	-29405.4	-31945.4	0.0286011	0.0278059	9971.81
86.6	0.335209	5779.46	359.75	-2863.54											86.6	359.75	2548.88	-29437.5	-31986.4	0.0282757	0.0274982	9861.46
86.7	0.331066	5708.04	359.85	-2934.96											86.7	359.85	2557.78	-29469.7	-32027.5	0.0279538	0.0271936	9752.24
86.8	0.30994	5343.8	359.95	-3299.2											86.8	359.95	2566.68	-29501.9	-32068.6	0.0276354	0.0268922	9644.14
86.9	0.299852	5169.86	360.05	-3473.14											86.9	360.05	2575.6	-29534.1	-32109.7	0.0273204	0.0265938	9537.15
87	0.296316	5108.9	360.15	-3534.1											87	360.15	2584.52	-29566.2	-32150.8	0.0270088	0.0262986	9431.25
87.1	0.292329	5040.16	360.25	-3602.84											87.1	360.25	2593.45	-29598.4	-32191.9	0.0267007	0.0260063	9326.45
87.2	0.284448	4904.27	360.35	-3738.73											87.2	360.35	2602.39	-29630.6	-32233	0.0263959	0.0257171	9222.72
87.3	0.279792	4824	360.45	-3819											87.3	360.45	2611.34	-29662.8	-32274.1	0.0260944	0.0254308	9120.07
87.4	0.280518	4836.51	360.55	-3806.49											87.4	360.55	2620.3	-29694.9	-32315.2	0.0257962	0.0251475	9018.47
87.5	0.280508	4836.34	360.65	-3806.66											87.5	360.65	2629.27	-29727.1	-32356.4	0.0255013	0.0248672	8917.92
87.6	0.275453	4749.18	360.75	-3893.82											87.6	360.75	2638.24	-29759.3	-32397.5	0.0252096	0.0245897	8818.41
87.7	0.267761	4616.57	360.85	-4026.43											87.7	360.85	2647.23	-29791.5	-32438.7	0.024921	0.0243151	8719.94
87.8	0.262574	4527.13	360.95	-4115.87											87.8	360.95	2656.22	-29823.6	-32479.9	0.0246357	0.0240433	8622.49
87.9	0.258939	4464.46	361.05	-4178.54											87.9	361.05	2665.22	-29855.8	-32521	0.0243534	0.0237744	8526.04
88	0.244918	4222.72	361.15	-4420.28											88	361.15	2674.24	-29888	-32562.2	0.0240742	0.0235083	8430.6
88.1	0.242108	4174.27	361.25	-4468.73											88.1	361.25	2683.26	-29920.2	-32603.4	0.0237981	0.0232449	8336.16
88.2	0.239471	4128.8	361.35	-4514.2											88.2	361.35	2692.29	-29952.3	-32644.6	0.023525	0.0229843	8242.7
88.3	0.22572	3891.72	361.45	-4751.28											88.3	361.45	2701.33	-29984.5	-32685.9	0.0232549	0.0227264	8150.21
88.4	0.215387	3713.57	361.55	-4929.43											88.4	361.55	2710.37	-30016.7	-32727.1	0.0229878	0.0224712	8058.7
88.5	0.21175	3650.85	361.65	-4992.15											88.5	361.65	2719.43	-30048.9	-32768.3	0.0227236	0.0222187	7968.14
88.6	0.208118	3588.25	361.75	-5054.75											88.6	361.75	2728.49	-30081.1	-32809.5	0.0224623	0.0219688	7878.52
88.7	0.204913	3532.98	361.85	-5110.02											88.7	361.85	2737.57	-30113.2	-32850.8	0.0222039	0.0217216	7789.85
88.8	0.197319	3402.05	361.95	-5240.95											88.8	361.95	2746.65	-30145.4	-32892.1	0.0219483	0.0214769	7702.11
88.9	0.186961	3223.47	362.05	-5419.53											88.9	362.05	2755.74	-30177.6	-32933.3	0.0216955	0.0212348	7615.29
89	0.174269	3004.64	362.15	-5638.36											89	362.15	2764.84	-30209.8	-32974.6	0.0214455	0.0209953	7529.39
89.1	0.169456	2921.66	362.25	-5721.34											89.1	362.25	2773.95	-30241.9	-33015.9	0.0211983	0.0207583	7444.39
89.2	0.153153	2640.58	362.35	-6002.42											89.2	362.35	2783.07	-30274.1	-33057.2	0.0209538	0.0205238	7360.28
89.3	0.145202	2503.48	362.45	-6139.52											89.3	362.45	2792.2	-30306.3	-33098.5	0.020712	0.0202917	7277.07
89.4	0.140239	2417.91	362.55	-6225.09											89.4	362.55	2801.34	-30338.5	-33139.8	0.0204729	0.0200621	7194.73
89.5	0.138474	2387.48	362.65	-6255.52											89.5	362.65	2810.48	-30370.6	-33181.1	0.0202364	0.019835	7113.27
89.6	0.137583	2372.12	362.75	-6270.88											89.6	362.75	2819.64	-30402.8	-33222.4	0.0200025	0.0196102	7032.67
89.7	0.133121	2295.19	362.85	-6347.81											89.7	362.85	2828.8	-30435	-33263.8	0.0197712	0.0193879	6952.92
89.8	0.125061	2156.22	362.95	-6486.78											89.8	362.95	2837.97	-30467.2	-33305.1	0.0195424	0.0191679	6874.03
89.9	0.122155	2106.12	363.05	-6536.88											89.9	363.05	2847.15	-30499.3	-33346.5	0.0193162	0.0189502	6795.97
90	0.130164	2244.2	363.15	-6398.8											90	363.15	2856.34	-30531.5	-33387.8	0.0190925	0.0187348	6718.74
90.1	0.121174	2089.2	363.25	-6553.8											90.1	363.25	2865.54	-30563.7	-33429.2	0.0188713	0.0185218	6642.33
90.2	0.120146	2071.48	363.35	-6571.52											90.2	363.35	2874.75	-30595.9	-33470.6	0.0186526	0.018311	6566.74
90.3	0.116637	2010.98	363.45	-6632.02											90.3	363.45	2883.96	-30628	-33512	0.0184362	0.0181025	6491.96
90.4	0.105159	1813.09	363.55	-6829.91											90.4	363.55	2893.19	-30660.2	-33553.4	0.0182223	0.0178962	6417.97
90.5	0.0960307	1655.7	363.65	-6987.3											90.5	363.65	2902.42	-30692.4	-33594.8	0.0180107	0.0176921	6344.78
90.6	0.096158	1657.9	363.75	-6985.1											90.6	363.75	2911.66	-30724.6	-33636.2	0.0178015	0.0174902	6272.37
90.7	0.0903472	1557.71	363.85	-7085.29											90.7	363.85	2920.91	-30756.7	-33677.7	0.0175946	0.0172904	6200.74
90.8	0.0899898	1551.55	363.95	-7091.45											90.8	363.95	2930.18	-30788.9	-33719.1	0.0173901	0.0170928	6129.87
90.9	0.075466	1301.14	364.05	-7341.86											90.9	364.05	2939.44	-30821.1	-33760.5	0.0171878	0.0168973	6059.77
91	0.0849097	1463.96	364.15	-7179.04											91	364.15	2948.72	-30853.3	-33802	0.0169877	0.016704	5990.42
91.1	0.0912526	1573.32	364.25	-7069.68											91.1	364.25	2958.01	-30885.4	-33843.4	0.0167899	0.0165127	5921.82
91.2	0.0939592	1619.99	364.35	-7023.01											91.2	364.35	2967.3	-30917.6	-33884.9	0.0165943	0.0163235	5853.96
91.3	0.0978614	1687.26	364.45	-6955.74											91.3	364.45	2976.61	-30949.8	-33926.4	0.0164009	0.0161363	5786.83
91.4	0.0924176	1593.41	364.55	-7049.59											91.4	364.55	2985.92	-30982	-33967.9	0.0162097	0.0159511	5720.42
91.5	0.0741505	1278.46	364.65	-7364.54											91.5	364.65	2995.24	-31014.1	-34009.4	0.0160205	0.0157679	5654.74
91.6	0.0504904	870.524	364.75	-7772.48											91.6	364.75	3004.58	-31046.3	-34050.9	0.0158335	0.0155867	5589.76
91.7	0.0419925	724.009	364.85	-7918.99											91.7	364.85	3013.92	-31078.5	-34092.4	0.0156486	0.0154075	5525.49
91.8	0.0137164	236.49	364.95	-8406.51											91.8	364.95	3023.26	-31110.7	-34133.9	0.0154658	0.0152302	5461.91
91.9	0.00186999	32.2412	365.05	-8610.76											91.9	365.05	3032.62	-31142.8	-34175.5	0.015285	0.0150549	5399.02
92	-0.00805647	-138.905	365.15	-8781.9											92	365.15	3041.99	-31175	-34217	0.0151062	0.0148814	5336.82
92.1	-0.0344295	-593.613	365.25	-9236.61											92.1	365.25	3051.36	-31207.2	-34258.6	0.0149295	0.0147099	5275.29
92.2	-0.0252993	-436.195	365.35	-9079.2											92.2	365.35	3060.75	-31239.4	-34300.1	0.0147547	0.0145402	5214.44
92.3	-0.0255795	-441.026	365.45	-9084.03											92.3	365.45	3070.14	-31271.5	-34341.7	0.0145819	0.0143723	5154.24
92.4	-0.0425224	-733.144	365.55	-9376.14											92.4	365.55	3079.54	-31303.7	-34383.3	0.014411	0.0142063	5094.7
92.5	-0.0461879	-796.344	365.65	-9439.34											92.5	365.65	3088.95	-31335.9	-34424.8	0.0142421	0.0140421	5035.82
92.6	-0.00708158	-122.096	365.75	-8765.1											92.6	365.75	3098.37	-31368.1	-34466.4	0.014075	0.0138797	4977.57
92.7	0.0207658	358.03	365.85	-8284.97											92.7	365.85	3107.8	-31400.2	-34508	0.0139099	0.0137191	4919.96
92.8	0.0291069	501.844	365.95	-8141.16											92.8	365.95	3117.24	-31432.4	-34549.7	0.0137466	0.0135602	4862.99
92.9	0.0457893	789.471	366.05	-7853.53											92.9	366.05	3126.68	-31464.6	-34591.3	0.0135851	0.013403	4806.63
93	0.0246062	424.245	366.15	-8218.76											93	366.15	3136.13	-31496.8	-34632.9	0.0134255	0.0132476	4750.9
93.1	-0.014971	-258.12	366.25	-8901.12											93.1	366.25	3145.6	-31528.9	-34674.5	0.0132676	0.0130939	4695.77
93.2	-0.0573196	-988.269	366.35	-9631.27											93.2	366.35	3155.07	-31561.1	-34716.2	0.0131116	0.0129419	4641.25
93.3	-0.0682232	-1176.26	366.45	-9819.26											93.3	366.45	3164.55	-31593.3	-34757.8	0.0129573	0.0127915	4587.34
93.4	-0.056081	-966.914	366.55	-9609.91											93.4	366.55	3174.04	-31625.5	-34799.5	0.0128047	0.0126428	4534.01
93.5	-0.0810243	-1396.97	366.65	-10040											93.5	366.65	3183.54	-31657.6	-34841.2	0.0126539	0.0124958	4481.27
93.6	-0.147343	-2540.39	366.75	-11183.4											93.6	366.75	3193.05	-31689.8	-34882.9	0.0125048	0.0123504	4429.11
93.7	-0.120398	-2075.82	366.85	-10718.8											93.7	366.85	3202.56	-31722	-34924.6	0.0123574	0.0122065	4377.53
93.8	-0.110353	-1902.64	366.95	-10545.6											93.8	366.95	3212.09	-31754.2	-34966.3	0.0122116	0.0120643	4326.52
93.9	-0.133024	-2293.52	367.05	-10936.5											93.9	367.05	3221.62	-31786.4	-35008	0.0120675	0.0119236	4276.07
94	-0.162543	-2802.47	367.15	-11445.5											94	367.15	3231.16	-31818.5	-35049.7	0.011925	0.0117845	4226.18
94.1	-0.18708	-3225.52	367.25	-11868.5											94.1	367.25	3240.71	-31850.7	-35091.4	0.0117842	0.0116469	4176.85
94.2	-0.173201	-2986.22	367.35	-11629.2											94.2	367.35	3250.27	-31882.9	-35133.1	0.0116449	0.0115109	4128.05
94.3	-0.152777	-2634.09	367.45	-11277.1											94.3	367.45	3259.84	-31915.1	-35174.9	0.0115072	0.0113763	4079.8
94.4	-0.1628	-2806.9	367.55	-11449.9											94.4	367.55	3269.42	-31947.2	-35216.6	0.0113711	0.0112433	4032.09
94.5	-0.187378	-3230.66	367.65	-11873.7											94.5	367.65	3279	-31979.4	-35258.4	0.0112366	0.0111117	3984.91
94.6	-0.222907	-3843.23	367.75	-12486.2											94.6	367.75	3288.6	-32011.6	-35300.2	0.0111035	0.0109816	3938.25
94.7	-0.313313	-5401.95	367.85	-14044.9											94.7	367.85	3298.2	-32043.8	-35342	0.010972	0.0108529	3892.11
94.8	-0.43911	-7570.87	367.95	-16213.9											94.8	367.95	3307.81	-32075.9	-35383.7	0.010842	0.0107257	3846.48
94.9	-0.517	-8913.79	368.05	-17556.8											94.9	368.05	3317.43	-32108.1	-35425.5	0.0107135	0.0105999	3801.36
95	-0.52211	-9001.9	368.15	-17644.9											95	368.15	3327.06	-32140.3	-35467.3	0.0105864	0.0104755	3756.75

## Sheet: CD-1b
		015-001	015-002	015-003	015-004	015-005	015-006	015-007	015-008	015-009	015-010														C	5.37288e-05	M	Get your concentration
	Wavelength [nm]	Intensity	intensity	intensity	intensity	intensity	intensity	intensity	intensity	intensity	intensity		Wavelength [nm]	0	10	20	30	40	50	60	70	80	90		l	0.1
Input your raw data from Spectragryph	190	-3.20661	0.602512	0.219658	6.98579	1.58356	-6.59362	5.01834	0.665996	-5.07771	-13.7625		190	-59681.4	11213.9	4088.28	130019	29473.3	-122720	93401.2	12395.5	-94506.3	-256148
	190.1	-2.73945	0.764509	-0.22258	6.49084	1.74452	-5.60455	5.62263	-1.622	-4.61073	-14.9257		190.1	-50986.7	14229	-4142.65	120807	32468.9	-104312	104648	-30188.6	-85814.9	-277798		A	1.268	Input the following parameters
	190.2	-2.16063	0.875508	-0.0676799	5.99837	1.32469	-4.67796	6.57818	-4.57069	-4.11241	-13.7357		190.2	-40213.7	16294.9	-1259.66	111642	24655.1	-87066.2	122433	-85069.6	-76540.2	-255648		# of Trp	4
	190.3	-1.63092	0.814342	0.161105	5.42895	0.715936	-3.70355	7.63405	-6.2678	-3.68528	-12.838		190.3	-30354.7	15156.5	2998.49	101044	13325	-68930.4	142085	-116656	-68590.4	-238940		# of Tyr	1
	190.4	-1.20224	0.718684	0.281186	4.94889	0.182494	-2.94443	8.09486	-6.89202	-3.36496	-12.49		190.4	-22376	13376.1	5233.42	92108.6	3396.58	-54801.7	150661	-128274	-62628.6	-232464
	190.5	-0.876948	0.574856	0.322761	4.58054	-0.284615	-2.46408	8.09538	-7.10178	-3.13628	-12.3657		190.5	-16321.7	10699.2	6007.23	85252.9	-5297.26	-45861.4	150671	-132178	-58372.4	-230150
	190.6	-0.576949	0.387406	0.282587	4.24263	-0.688543	-2.15877	7.85275	-7.11489	-3.04229	-12.2644		190.6	-10738.2	7210.39	5259.5	78963.8	-12815.2	-40179	146155	-132422	-56623.1	-228265
	190.7	-0.306507	0.170453	0.175379	3.90221	-1.02963	-2.00773	7.54139	-6.98087	-2.98473	-12.1404		190.7	-5704.71	3172.46	3264.15	72627.9	-19163.5	-37367.9	140360	-129928	-55551.8	-225956
	190.8	-0.0800399	-0.0467846	0.0476268	3.56023	-1.29432	-1.97146	7.19352	-6.76447	-2.8816	-11.9154		190.8	-1489.7	-870.754	886.43	66262.9	-24089.8	-36692.7	133886	-125900	-53632.3	-221769
	190.9	0.0739396	-0.242632	-0.0808303	3.23572	-1.47507	-2.0113	6.82412	-6.51856	-2.72972	-11.5805		190.9	1376.16	-4515.87	-1504.41	60223.3	-27453.9	-37434.3	127010	-121323	-50805.5	-215536
	191	0.169242	-0.408936	-0.19454	2.93355	-1.61419	-2.07338	6.44613	-6.26148	-2.52489	-11.1575		191	3149.93	-7611.12	-3620.78	54599.1	-30043.3	-38589.8	119975	-116539	-46993.2	-207662
	191.1	0.223334	-0.55438	-0.284419	2.64469	-1.73105	-2.13428	6.05891	-5.99981	-2.28791	-10.6427		191.1	4156.7	-10318.1	-5293.61	49223	-32218.3	-39723.1	112768	-111668	-42582.6	-198081
	191.2	0.25166	-0.686635	-0.352474	2.36125	-1.82362	-2.19538	5.66085	-5.73431	-2.04603	-10.0592		191.2	4683.89	-12779.6	-6560.25	43947.5	-33941.2	-40860.4	105360	-106727	-38080.7	-187221
	191.3	0.265024	-0.807109	-0.401711	2.07108	-1.90006	-2.25298	5.26641	-5.46335	-1.82272	-9.43917		191.3	4932.63	-15021.9	-7476.63	38546.8	-35363.9	-41932.5	98018.4	-101684	-33924.4	-175682
	191.4	0.262802	-0.917626	-0.432845	1.76994	-1.96513	-2.31096	4.89057	-5.19258	-1.63432	-8.81285		191.4	4891.26	-17078.8	-8056.11	32942.1	-36575	-43011.6	91023.2	-96644.2	-30417.9	-164025
	191.5	0.24261	-1.01255	-0.440046	1.46769	-2.02083	-2.37399	4.53573	-4.92445	-1.48097	-8.18895		191.5	4515.46	-18845.6	-8190.13	27316.6	-37611.7	-44184.7	84419	-91653.9	-27563.8	-152413
	191.6	0.208293	-1.09124	-0.420383	1.17411	-2.06461	-2.43835	4.20648	-4.66855	-1.36264	-7.57968		191.6	3876.75	-20310.1	-7824.17	21852.5	-38426.5	-45382.5	78290.9	-86891.1	-25361.4	-141073
	191.7	0.167012	-1.15692	-0.374236	0.89351	-2.09661	-2.49568	3.90279	-4.42623	-1.27714	-6.9974		191.7	3108.42	-21532.7	-6965.27	16630	-39022	-46449.5	72638.6	-82380.9	-23770.2	-130235
	191.8	0.121856	-1.21694	-0.304376	0.624364	-2.11777	-2.53843	3.61678	-4.19323	-1.21946	-6.44682		191.8	2267.98	-22649.7	-5665.05	11620.7	-39415.9	-47245.3	67315.4	-78044.3	-22696.6	-119988
	191.9	0.0774091	-1.27445	-0.215974	0.366811	-2.12807	-2.56696	3.34512	-3.96459	-1.18586	-5.92862		191.9	1440.74	-23720	-4019.71	6827.07	-39607.6	-47776.2	62259.3	-73789	-22071.2	-110343
	192	0.0361166	-1.32695	-0.115603	0.120903	-2.13069	-2.58094	3.08618	-3.73834	-1.17282	-5.44401		192	672.201	-24697.2	-2151.61	2250.24	-39656.3	-48036.5	57439.9	-69578	-21828.5	-101324
	192.1	-0.00086816	-1.37249	-0.00798021	-0.113266	-2.13107	-2.58027	2.8438	-3.5185	-1.17489	-4.99369		192.1	-16.1582	-25544.8	-148.528	-2108.11	-39663.4	-48023.9	52928.8	-65486.2	-21867.1	-92942.5
	192.2	-0.0330574	-1.40873	0.102189	-0.33044	-2.1302	-2.56687	2.61746	-3.30341	-1.18211	-4.58044		192.2	-615.264	-26219.3	1901.93	-6150.15	-39647.2	-47774.5	48716.1	-61483	-22001.4	-85251.1
	192.3	-0.0568161	-1.43691	0.207488	-0.529707	-2.12868	-2.53993	2.41037	-3.10317	-1.18625	-4.20491		192.3	-1057.46	-26743.8	3861.76	-9858.91	-39618.9	-47273.1	44861.7	-57756.2	-22078.5	-78261.7
	192.4	-0.0744536	-1.45962	0.30754	-0.713145	-2.12667	-2.50451	2.21641	-2.9102	-1.18866	-3.86055		192.4	-1385.73	-27166.5	5723.93	-13273.1	-39581.5	-46614	41251.8	-54164.6	-22123.4	-71852.5
	192.5	-0.0891748	-1.47807	0.400995	-0.882302	-2.12182	-2.46591	2.02925	-2.7162	-1.1891	-3.54765		192.5	-1659.72	-27509.7	7463.32	-16421.4	-39491.3	-45895.4	37768.4	-50553.9	-22131.6	-66028.7
	192.6	-0.102585	-1.49223	0.487816	-1.03845	-2.11306	-2.42738	1.84554	-2.52222	-1.18689	-3.26033		192.6	-1909.32	-27773.3	9079.22	-19327.6	-39328.2	-45178.4	34349.2	-46943.5	-22090.5	-60681.2
	192.7	-0.115361	-1.502	0.568894	-1.18225	-2.10186	-2.38814	1.66784	-2.33418	-1.18232	-2.9927		192.7	-2147.1	-27955.2	10588.3	-22004	-39119.8	-44448	31041.8	-43443.7	-22005.4	-55700.2
	192.8	-0.127597	-1.50785	0.644859	-1.31555	-2.08828	-2.34809	1.50077	-2.15192	-1.17577	-2.74039		192.8	-2374.84	-28064	12002.1	-24485	-38867	-43702.6	27932.4	-40051.5	-21883.5	-51004.1
	192.9	-0.1389	-1.50973	0.71637	-1.43938	-2.07154	-2.30555	1.34474	-1.97413	-1.1666	-2.50387		192.9	-2585.21	-28099	13333.1	-26789.8	-38555.5	-42910.9	25028.3	-36742.5	-21712.7	-46602
	193	-0.149715	-1.5068	0.783687	-1.55334	-2.05198	-2.2608	1.1995	-1.80035	-1.15674	-2.28281		193	-2786.5	-28044.6	14586	-28910.8	-38191.4	-42077.9	22325	-33508.1	-21529.2	-42487.7
	193.1	-0.160628	-1.49877	0.847069	-1.6569	-2.03045	-2.21363	1.06492	-1.63131	-1.14649	-2.07704		193.1	-2989.6	-27895.1	15765.6	-30838.1	-37790.7	-41200.1	19820.3	-30361.8	-21338.4	-38657.8
	193.2	-0.17109	-1.48605	0.906212	-1.75054	-2.00731	-2.1638	0.939623	-1.46882	-1.1364	-1.88838		193.2	-3184.33	-27658.4	16866.4	-32581	-37360	-40272.7	17488.2	-27337.6	-21150.7	-35146.5
	193.3	-0.180001	-1.4692	0.960475	-1.83493	-1.98327	-2.11066	0.822495	-1.31298	-1.12944	-1.71637		193.3	-3350.17	-27344.8	17876.3	-34151.7	-36912.5	-39283.5	15308.3	-24437.2	-21021.1	-31945
	193.4	-0.186354	-1.44909	1.00929	-1.9109	-1.959	-2.05353	0.713809	-1.16371	-1.12615	-1.56148		193.4	-3468.41	-26970.5	18784.9	-35565.7	-36460.9	-38220.3	13285.4	-21658.9	-20959.8	-29062.3
	193.5	-0.190197	-1.42661	1.05218	-1.97877	-1.93458	-1.99402	0.613648	-1.02049	-1.12579	-1.42447		193.5	-3539.94	-26552	19583.2	-36828.8	-36006.4	-37112.7	11421.2	-18993.4	-20953.2	-26512.2
	193.6	-0.191478	-1.40223	1.08818	-2.03869	-1.90961	-1.93334	0.521406	-0.882153	-1.12663	-1.30577		193.6	-3563.79	-26098.3	20253.2	-37944	-35541.6	-35983.3	9704.41	-16418.6	-20968.9	-24302.9
	193.7	-0.190116	-1.37647	1.11755	-2.09129	-1.88338	-1.87171	0.436139	-0.748711	-1.1271	-1.20384		193.7	-3538.44	-25618.8	20799.8	-38923.1	-35053.5	-34836.2	8117.41	-13935	-20977.6	-22405.8
	193.8	-0.186738	-1.34964	1.14013	-2.13699	-1.85488	-1.80943	0.357056	-0.621232	-1.12666	-1.11654		193.8	-3475.57	-25119.5	21220.1	-39773.7	-34523.1	-33677.1	6645.52	-11562.4	-20969.5	-20781
	193.9	-0.182271	-1.3217	1.15601	-2.17619	-1.82403	-1.74636	0.283889	-0.499872	-1.12522	-1.04234		193.9	-3392.42	-24599.5	21515.6	-40503.2	-33948.7	-32503.2	5283.73	-9303.61	-20942.6	-19400
	194	-0.177071	-1.29256	1.16477	-2.20911	-1.79163	-1.68236	0.21642	-0.384077	-1.12197	-0.980322		194	-3295.64	-24057.2	21678.7	-41115.8	-33345.8	-31312	4028.01	-7148.43	-20882	-18245.7
	194.1	-0.170783	-1.26268	1.16619	-2.23598	-1.75889	-1.61655	0.154258	-0.273532	-1.11545	-0.928882		194.1	-3178.61	-23500.9	21705.1	-41616.1	-32736.5	-30087.2	2871.05	-5090.98	-20760.7	-17288.3
	194.2	-0.163538	-1.23242	1.16065	-2.25695	-1.72664	-1.54842	0.0969109	-0.168082	-1.10517	-0.885688		194.2	-3043.77	-22937.7	21602	-42006.3	-32136.3	-28819.3	1803.71	-3128.34	-20569.4	-16484.4
	194.3	-0.155828	-1.20266	1.14818	-2.27244	-1.69481	-1.47844	0.0434302	-0.0676062	-1.09133	-0.848063		194.3	-2900.26	-22383.9	21370	-42294.6	-31543.7	-27516.7	808.323	-1258.29	-20311.8	-15784.1
	194.4	-0.14784	-1.17443	1.12823	-2.28274	-1.66252	-1.40742	-0.00674618	0.0281647	-1.07432	-0.815021		194.4	-2751.59	-21858.5	20998.6	-42486.3	-30942.9	-26195	-125.56	524.201	-19995.2	-15169.2
	194.5	-0.139727	-1.14813	1.10048	-2.28842	-1.62969	-1.336	-0.0540929	0.1193	-1.05462	-0.786332		194.5	-2600.59	-21368.9	20482.1	-42592.1	-30331.7	-24865.6	-1006.78	2220.4	-19628.6	-14635.2
	194.6	-0.131923	-1.12379	1.06506	-2.29077	-1.59654	-1.26482	-0.0987358	0.205797	-1.03276	-0.761197		194.6	-2455.36	-20916	19822.9	-42635.8	-29714.7	-23540.9	-1837.67	3830.29	-19221.8	-14167.4
	194.7	-0.124613	-1.10151	1.02209	-2.2908	-1.564	-1.19451	-0.140516	0.287415	-1.00951	-0.739292		194.7	-2319.29	-20501.2	19023.2	-42636.3	-29109.1	-22232.2	-2615.28	5349.36	-18789	-13759.7
	194.8	-0.118252	-1.08152	0.972018	-2.28899	-1.53251	-1.12548	-0.179165	0.363976	-0.985953	-0.721046		194.8	-2200.9	-20129.2	18091.2	-42602.7	-28523.1	-20947.4	-3334.62	6774.32	-18350.5	-13420.1
	194.9	-0.113489	-1.06412	0.915604	-2.28601	-1.50225	-1.05853	-0.214475	0.435062	-0.962561	-0.705905		194.9	-2112.25	-19805.3	17041.2	-42547.2	-27959.8	-19701.3	-3991.8	8097.37	-17915.2	-13138.3
	195	-0.111011	-1.04925	0.853863	-2.28182	-1.47343	-0.994911	-0.246504	0.500031	-0.939208	-0.692865		195	-2066.14	-19528.6	15892.1	-42469.2	-27423.4	-18517.3	-4587.92	9306.58	-17480.5	-12895.6
	195.1	-0.111247	-1.03687	0.787871	-2.27605	-1.44625	-0.935106	-0.275621	0.558564	-0.916283	-0.681145		195.1	-2070.53	-19298.3	14663.8	-42361.9	-26917.6	-17404.2	-5129.85	10396	-17053.8	-12677.5
	195.2	-0.114288	-1.02729	0.718604	-2.26858	-1.42073	-0.878869	-0.301978	0.610583	-0.894356	-0.670233		195.2	-2127.13	-19119.9	13374.7	-42222.8	-26442.5	-16357.5	-5620.4	11364.2	-16645.7	-12474.4
	195.3	-0.119994	-1.02092	0.647065	-2.25965	-1.39694	-0.826036	-0.325495	0.655691	-0.874362	-0.660017		195.3	-2233.32	-19001.4	12043.2	-42056.6	-25999.8	-15374.2	-6058.11	12203.7	-16273.6	-12284.2
	195.4	-0.128237	-1.01829	0.574015	-2.24978	-1.37513	-0.77644	-0.346182	0.693728	-0.857089	-0.650501		195.4	-2386.74	-18952.4	10683.6	-41872.8	-25593.9	-14451.1	-6443.13	12911.7	-15952.1	-12107.1
	195.5	-0.13877	-1.01987	0.500487	-2.23955	-1.35544	-0.730015	-0.364497	0.725254	-0.842943	-0.641664		195.5	-2582.79	-18981.9	9315.07	-41682.5	-25227.4	-13587	-6784.02	13498.4	-15688.8	-11942.7
	195.6	-0.151582	-1.026	0.427286	-2.22941	-1.33797	-0.686898	-0.38135	0.751079	-0.831913	-0.633723		195.6	-2821.25	-19095.9	7952.64	-41493.7	-24902.2	-12784.5	-7097.69	13979.1	-15483.5	-11794.8
	195.7	-0.166931	-1.03698	0.354925	-2.21977	-1.32279	-0.647438	-0.397465	0.771744	-0.824001	-0.626661		195.7	-3106.93	-19300.2	6605.85	-41314.4	-24619.8	-12050.1	-7397.61	14363.7	-15336.3	-11663.4
	195.8	-0.18451	-1.05293	0.283644	-2.2112	-1.30981	-0.612001	-0.413323	0.787448	-0.819635	-0.620051		195.8	-3434.1	-19597.2	5279.18	-41154.8	-24378.1	-11390.6	-7692.76	14656	-15255	-11540.4
	195.9	-0.203988	-1.07342	0.213569	-2.20415	-1.29903	-0.580973	-0.428891	0.798712	-0.819253	-0.613972		195.9	-3796.63	-19978.4	3974.94	-41023.6	-24177.5	-10813.1	-7982.52	14865.6	-15247.9	-11427.2
	196	-0.225332	-1.09754	0.144944	-2.19883	-1.29067	-0.554403	-0.444287	0.80615	-0.823078	-0.608724		196	-4193.87	-20427.3	2697.7	-40924.7	-24021.9	-10318.5	-8269.07	15004.1	-15319.1	-11329.6
	196.1	-0.248549	-1.1247	0.0781915	-2.19586	-1.28529	-0.532138	-0.459622	0.809859	-0.830968	-0.604425		196.1	-4626	-20932.9	1455.3	-40869.2	-23921.9	-9904.14	-8554.48	15073.1	-15466	-11249.6
	196.2	-0.273756	-1.15453	0.0137125	-2.19555	-1.28354	-0.514137	-0.474966	0.809513	-0.842868	-0.601371		196.2	-5095.14	-21488.1	255.217	-40863.5	-23889.3	-9569.1	-8840.06	15066.6	-15687.5	-11192.7
	196.3	-0.300939	-1.18687	-0.0480458	-2.19799	-1.28573	-0.500344	-0.490217	0.805148	-0.858355	-0.599858		196.3	-5601.08	-22090	-894.227	-40909	-23930.1	-9312.4	-9123.91	14985.4	-15975.7	-11164.5
	196.4	-0.330165	-1.22167	-0.10657	-2.20308	-1.29179	-0.490993	-0.505755	0.797041	-0.8766	-0.599893		196.4	-6145.03	-22737.8	-1983.49	-41003.6	-24042.8	-9138.36	-9413.1	14834.5	-16315.3	-11165.2
	196.5	-0.361467	-1.25892	-0.161621	-2.21062	-1.30135	-0.486358	-0.522432	0.785359	-0.89709	-0.601706		196.5	-6727.62	-23431	-3008.08	-41144	-24220.7	-9052.08	-9723.5	14617.1	-16696.6	-11198.9
	196.6	-0.394744	-1.29865	-0.213218	-2.22058	-1.31406	-0.486585	-0.540804	0.770112	-0.919605	-0.605543		196.6	-7346.97	-24170.4	-3968.42	-41329.3	-24457.4	-9056.32	-10065.4	14333.3	-17115.7	-11270.4
	196.7	-0.429925	-1.3408	-0.261488	-2.23323	-1.32968	-0.491788	-0.561237	0.751311	-0.944335	-0.611436		196.7	-8001.75	-24955	-4866.81	-41564.8	-24748	-9153.15	-10445.7	13983.4	-17576	-11380
	196.8	-0.467011	-1.38523	-0.30647	-2.24902	-1.34822	-0.502173	-0.584182	0.72902	-0.971247	-0.619381		196.8	-8692	-25781.9	-5704.01	-41858.8	-25093.1	-9346.43	-10872.8	13568.5	-18076.8	-11527.9
	196.9	-0.506107	-1.43155	-0.348184	-2.26829	-1.37001	-0.517898	-0.610106	0.703605	-0.999917	-0.629334		196.9	-9419.67	-26643.9	-6480.39	-42217.3	-25498.7	-9639.12	-11355.3	13095.5	-18610.4	-11713.2
	197	-0.547212	-1.47921	-0.38692	-2.29109	-1.39521	-0.538957	-0.639029	0.675446	-1.02996	-0.64107		197	-10184.7	-27531.1	-7201.35	-42641.6	-25967.6	-10031.1	-11893.6	12571.4	-19169.6	-11931.6
	197.1	-0.59023	-1.52765	-0.422898	-2.31706	-1.42375	-0.565347	-0.670855	0.644793	-1.06139	-0.654344		197.1	-10985.4	-28432.6	-7870.96	-43125	-26498.8	-10522.2	-12486	12000.9	-19754.6	-12178.6
	197.2	-0.635117	-1.57633	-0.456471	-2.34582	-1.45527	-0.596995	-0.705461	0.611879	-1.09469	-0.668414		197.2	-11820.8	-29338.7	-8495.84	-43660.4	-27085.4	-11111.3	-13130	11388.3	-20374.4	-12440.5
	197.3	-0.675074	-1.61437	-0.486914	-2.38714	-1.4855	-0.620636	-0.755317	0.594234	-1.11968	-0.65745		197.3	-12564.5	-30046.5	-9062.44	-44429.5	-27648.1	-11551.3	-14057.9	11059.9	-20839.5	-12236.4
	197.4	-0.738752	-1.64164	-0.520483	-2.3842	-1.48372	-0.668905	-0.810058	0.643289	-1.1668	-0.680451		197.4	-13749.6	-30554.2	-9687.23	-44374.7	-27614.9	-12449.7	-15076.8	11972.9	-21716.5	-12664.5
	197.5	-0.801403	-1.66703	-0.559589	-2.38194	-1.47987	-0.709887	-0.857727	0.670074	-1.21462	-0.728399		197.5	-14915.7	-31026.7	-10415.1	-44332.5	-27543.4	-13212.4	-15964	12471.4	-22606.4	-13557
	197.6	-0.860289	-1.68959	-0.597407	-2.38281	-1.47762	-0.750469	-0.895448	0.665455	-1.25651	-0.768075		197.6	-16011.7	-31446.7	-11118.9	-44348.7	-27501.5	-13967.7	-16666.1	12385.4	-23386.1	-14295.4
	197.7	-0.916329	-1.71131	-0.632209	-2.38464	-1.48254	-0.783176	-0.921025	0.631474	-1.29889	-0.800897		197.7	-17054.7	-31850.9	-11766.7	-44382.8	-27593	-14576.5	-17142.1	11753	-24174.9	-14906.3
	197.8	-0.96988	-1.73379	-0.665101	-2.3889	-1.49536	-0.809713	-0.932535	0.581724	-1.34131	-0.832873		197.8	-18051.4	-32269.2	-12378.9	-44462.1	-27831.5	-15070.4	-17356.3	10827	-24964.4	-15501.4
	197.9	-1.0213	-1.75718	-0.697145	-2.39647	-1.5132	-0.832629	-0.938052	0.530447	-1.38215	-0.871952		197.9	-19008.4	-32704.7	-12975.3	-44603	-28163.7	-15496.9	-17459	9872.67	-25724.6	-16228.8
	198	-1.0713	-1.78084	-0.730056	-2.405	-1.53506	-0.853876	-0.94538	0.478048	-1.4225	-0.921596		198	-19939.1	-33144.9	-13587.8	-44761.8	-28570.5	-15892.3	-17595.4	8897.42	-26475.6	-17152.7
	198.1	-1.12086	-1.80537	-0.764464	-2.41344	-1.56144	-0.876655	-0.955734	0.424983	-1.46573	-0.977838		198.1	-20861.4	-33601.6	-14228.2	-44918.9	-29061.4	-16316.3	-17788.1	7909.78	-27280.2	-18199.5
	198.2	-1.17033	-1.83149	-0.800161	-2.42192	-1.59205	-0.901697	-0.969625	0.368367	-1.5095	-1.04053		198.2	-21782.2	-34087.7	-14892.6	-45076.7	-29631.2	-16782.4	-18046.7	6856.05	-28094.7	-19366.3
	198.3	-1.21884	-1.8593	-0.837844	-2.43129	-1.62598	-0.930096	-0.987264	0.308491	-1.55537	-1.10795		198.3	-22685.1	-34605.3	-15593.9	-45251.2	-30262.8	-17310.9	-18375	5741.62	-28948.4	-20621.2
	198.4	-1.26601	-1.88878	-0.878144	-2.44217	-1.66306	-0.961225	-1.0079	0.246618	-1.60357	-1.17806		198.4	-23562.9	-35154	-16344	-45453.6	-30952.9	-17890.3	-18759	4590.04	-29845.7	-21926
	198.5	-1.3125	-1.92004	-0.921051	-2.45507	-1.70277	-0.995551	-1.0303	0.182989	-1.65307	-1.25034		198.5	-24428.2	-35735.7	-17142.6	-45693.7	-31691.9	-18529.2	-19175.8	3405.78	-30766.9	-23271.4
	198.6	-1.35912	-1.95278	-0.966417	-2.46984	-1.74443	-1.03431	-1.0541	0.118272	-1.70204	-1.32393		198.6	-25295.9	-36345.2	-17986.9	-45968.6	-32467.3	-19250.6	-19618.9	2201.28	-31678.4	-24641
	198.7	-1.40615	-1.98647	-1.01406	-2.48638	-1.78766	-1.07734	-1.07973	0.0528213	-1.74897	-1.39732		198.7	-26171.2	-36972.2	-18873.7	-46276.5	-33272	-20051.5	-20095.9	983.109	-32551.8	-26006.9
	198.8	-1.45415	-2.02069	-1.06308	-2.50464	-1.83191	-1.12417	-1.10787	-0.0140193	-1.79351	-1.46866		198.8	-27064.5	-37609.1	-19786.1	-46616.4	-34095.5	-20923	-20619.7	-260.928	-33380.7	-27334.8
	198.9	-1.50388	-2.05529	-1.11348	-2.52432	-1.87662	-1.17446	-1.13896	-0.083234	-1.83583	-1.53708		198.9	-27990.2	-38253.1	-20724.1	-46982.6	-34927.5	-21859	-21198.3	-1549.15	-34168.5	-28608.2
	199	-1.55569	-2.08994	-1.16504	-2.54538	-1.92196	-1.22777	-1.1727	-0.154286	-1.87634	-1.60244		199	-28954.4	-38898	-21683.8	-47374.6	-35771.5	-22851.3	-21826.2	-2871.57	-34922.5	-29824.6
	199.1	-1.60927	-2.12449	-1.21772	-2.56782	-1.96854	-1.28351	-1.20898	-0.226986	-1.91492	-1.665		199.1	-29951.8	-39541	-22664.1	-47792.3	-36638.4	-23888.6	-22501.4	-4224.66	-35640.4	-30988.9
	199.2	-1.66415	-2.15903	-1.27113	-2.59201	-2.01695	-1.34095	-1.24791	-0.301176	-1.95167	-1.72415		199.2	-30973.2	-40183.8	-23658.3	-48242.4	-37539.5	-24957.7	-23226	-5605.48	-36324.4	-32089.8
	199.3	-1.72037	-2.19362	-1.32487	-2.61829	-2.06731	-1.39992	-1.28951	-0.376636	-1.98713	-1.77916		199.3	-32019.4	-40827.7	-24658.5	-48731.7	-38476.7	-26055.4	-24000.4	-7009.95	-36984.3	-33113.7
	199.4	-1.7778	-2.22848	-1.37892	-2.64702	-2.11925	-1.46062	-1.33395	-0.453219	-2.02207	-1.82967		199.4	-33088.3	-41476.5	-25664.5	-49266.4	-39443.4	-27185	-24827.4	-8435.31	-37634.8	-34053.8
	199.5	-1.8362	-2.26368	-1.43344	-2.67821	-2.17213	-1.52336	-1.38104	-0.530734	-2.05706	-1.87629		199.5	-34175.4	-42131.6	-26679.1	-49846.8	-40427.7	-28352.7	-25703.9	-9878.02	-38286	-34921.5
	199.6	-1.89565	-2.29911	-1.48827	-2.71201	-2.226	-1.58817	-1.43056	-0.609076	-2.09261	-1.91957		199.6	-35281.8	-42791	-27699.7	-50475.8	-41430.4	-29559	-26625.6	-11336.1	-38947.7	-35726.9
	199.7	-1.95628	-2.33457	-1.54324	-2.74873	-2.28079	-1.65481	-1.48209	-0.688106	-2.12909	-1.95968		199.7	-36410.2	-43451	-28722.7	-51159.3	-42450.1	-30799.4	-27584.6	-12807	-39626.6	-36473.5
	199.8	-2.01803	-2.37	-1.59824	-2.78828	-2.33665	-1.72311	-1.53505	-0.767844	-2.16679	-1.99717		199.8	-37559.5	-44110.4	-29746.4	-51895.4	-43489.7	-32070.5	-28570.3	-14291.1	-40328.3	-37171.2
	199.9	-2.08108	-2.40542	-1.65306	-2.83045	-2.3934	-1.79292	-1.58908	-0.848408	-2.2061	-2.03262		199.9	-38733	-44769.7	-30766.8	-52680.4	-44545.9	-33369.9	-29575.9	-15790.6	-41060	-37831.1
	200	-2.14559	-2.44076	-1.70744	-2.87503	-2.45084	-1.86425	-1.64411	-0.929933	-2.24705	-2.06611		200	-39933.6	-45427.5	-31778.9	-53510	-45615	-34697.4	-30600.1	-17307.9	-41822.1	-38454.3
	200.1	-2.21164	-2.47581	-1.76109	-2.92149	-2.50884	-1.93722	-1.70023	-1.01245	-2.28939	-2.0975		200.1	-41163.1	-46079.7	-32777.4	-54374.8	-46694.5	-36055.5	-31644.6	-18843.6	-42610.1	-39038.6
	200.2	-2.2791	-2.51046	-1.81381	-2.96951	-2.56721	-2.01133	-1.75751	-1.09584	-2.33307	-2.12684		200.2	-42418.6	-46724.7	-33758.5	-55268.5	-47780.9	-37434.8	-32710.7	-20395.7	-43423	-39584.6
	200.3	-2.34773	-2.54477	-1.86552	-3.01887	-2.62569	-2.08606	-1.81573	-1.18017	-2.37804	-2.15449		200.3	-43696	-47363.3	-34721	-56187.1	-48869.3	-38825.7	-33794.4	-21965.4	-44260.1	-40099.4
	200.4	-2.41726	-2.57895	-1.91627	-3.06949	-2.68419	-2.16108	-1.87478	-1.2656	-2.42436	-2.18095		200.4	-44990	-47999.3	-35665.6	-57129.3	-49958.1	-40221.9	-34893.4	-23555.3	-45122.2	-40591.9
	200.5	-2.4875	-2.61312	-1.9662	-3.12145	-2.74274	-2.236	-1.9347	-1.3519	-2.47193	-2.20655		200.5	-46297.3	-48635.3	-36594.9	-58096.4	-51047.9	-41616.4	-36008.7	-25161.5	-46007.5	-41068.2
	200.6	-2.55821	-2.64736	-2.01535	-3.17477	-2.80135	-2.3105	-1.9956	-1.43872	-2.52061	-2.23137		200.6	-47613.4	-49272.6	-37509.7	-59088.7	-52138.7	-43002.9	-37142	-26777.5	-46913.6	-41530.3
	200.7	-2.62931	-2.68171	-2.06381	-3.22945	-2.86008	-2.38439	-2.05764	-1.52574	-2.57018	-2.25561		200.7	-48936.7	-49912	-38411.7	-60106.5	-53231.8	-44378.1	-38296.7	-28397.1	-47836.1	-41981.3
	200.8	-2.7008	-2.71626	-2.11175	-3.28549	-2.91891	-2.45759	-2.12086	-1.61285	-2.62051	-2.27924		200.8	-50267.3	-50555	-39303.9	-61149.5	-54326.6	-45740.6	-39473.4	-30018.3	-48772.8	-42421.1
	200.9	-2.77251	-2.75101	-2.1593	-3.34279	-2.97778	-2.53011	-2.1851	-1.70002	-2.67159	-2.30215		200.9	-51601.9	-51201.8	-40188.8	-62215.9	-55422.3	-47090.4	-40669.1	-31640.7	-49723.6	-42847.6
	201	-2.84428	-2.7857	-2.20661	-3.40115	-3.03672	-2.60199	-2.25009	-1.78713	-2.72323	-2.32459		201	-52937.7	-51847.5	-41069.4	-63302.2	-56519.4	-48428.3	-41878.6	-33262	-50684.7	-43265.2
	201.1	-2.91609	-2.82011	-2.2538	-3.46033	-3.09583	-2.6731	-2.31568	-1.87404	-2.77525	-2.34682		201.1	-54274.3	-52487.8	-41947.8	-64403.5	-57619.5	-49751.7	-43099.4	-34879.7	-51652.9	-43679
	201.2	-2.98794	-2.85416	-2.30099	-3.52024	-3.15514	-2.74328	-2.38172	-1.96089	-2.8274	-2.36885		201.2	-55611.4	-53121.6	-42825.9	-65518.7	-58723.4	-51057.9	-44328.5	-36496	-52623.5	-44089.1
	201.3	-3.05974	-2.88785	-2.34827	-3.58078	-3.21472	-2.81246	-2.44802	-2.04793	-2.87949	-2.39078		201.3	-56947.9	-53748.7	-43705.9	-66645.4	-59832.3	-52345.5	-45562.5	-38116	-53593	-44497.3
	201.4	-3.13146	-2.92127	-2.39566	-3.64175	-3.27452	-2.88066	-2.51426	-2.1351	-2.93124	-2.41273		201.4	-58282.6	-54370.6	-44587.9	-67780.2	-60945.4	-53614.7	-46795.3	-39738.5	-54556.3	-44905.7
	201.5	-3.20309	-2.95443	-2.44321	-3.7029	-3.33441	-2.94791	-2.58052	-2.22214	-2.9824	-2.43476		201.5	-59615.9	-54987.8	-45473	-68918.4	-62060	-54866.5	-48028.6	-41358.5	-55508.3	-45315.7
	201.6	-3.27457	-2.98737	-2.49106	-3.76403	-3.39417	-3.01426	-2.64696	-2.30887	-3.03284	-2.45696		201.6	-60946.3	-55600.9	-46363.6	-70056	-63172.3	-56101.3	-49265.2	-42972.6	-56447.2	-45728.8
	201.7	-3.34582	-3.02026	-2.53932	-3.82506	-3.45364	-3.07965	-2.71347	-2.39529	-3.08264	-2.47934		201.7	-62272.5	-56213.1	-47261.7	-71192.1	-64279	-57318.3	-50503.1	-44581.1	-57374	-46145.4
	201.8	-3.41682	-3.05319	-2.58804	-3.88608	-3.51272	-3.14407	-2.77995	-2.48145	-3.13194	-2.50185		201.8	-63593.9	-56826	-48168.6	-72327.7	-65378.8	-58517.3	-51740.3	-46184.8	-58291.7	-46564.4
	201.9	-3.48761	-3.08639	-2.63703	-3.94748	-3.57164	-3.20749	-2.84651	-2.56726	-3.18097	-2.52386		201.9	-64911.4	-57443.9	-49080.4	-73470.4	-66475.3	-59697.8	-52979.2	-47781.8	-59204.1	-46974
	202	-3.55852	-3.11976	-2.68595	-4.00893	-3.62999	-3.27031	-2.91353	-2.65132	-3.22998	-2.54535		202	-66231.2	-58064.9	-49990.9	-74614.2	-67561.4	-60866.9	-54226.6	-49346.3	-60116.4	-47374
	202.1	-3.62951	-3.15327	-2.73486	-4.07038	-3.68768	-3.33235	-2.98095	-2.73368	-3.27903	-2.56674		202.1	-67552.3	-58688.6	-50901.2	-75757.9	-68635	-62021.7	-55481.5	-50879.3	-61029.3	-47772.2
	202.2	-3.70048	-3.18685	-2.78375	-4.13181	-3.7446	-3.39349	-3.04838	-2.81467	-3.32786	-2.58801		202.2	-68873.3	-59313.6	-51811.2	-76901.2	-69694.5	-63159.5	-56736.3	-52386.7	-61938.1	-48168
	202.3	-3.77134	-3.22042	-2.83256	-4.19316	-3.80074	-3.45372	-3.11554	-2.89464	-3.37635	-2.60884		202.3	-70192.1	-59938.5	-52719.6	-78043	-70739.3	-64280.7	-57986.3	-53875	-62840.6	-48555.6
	202.4	-3.84199	-3.25396	-2.88119	-4.25435	-3.85611	-3.5128	-3.18212	-2.97375	-3.42458	-2.62913		202.4	-71507.1	-60562.6	-53624.7	-79182	-71769.9	-65380.3	-59225.5	-55347.4	-63738.3	-48933.3
	202.5	-3.91235	-3.28744	-2.92963	-4.31528	-3.91075	-3.5705	-3.24775	-3.05215	-3.47251	-2.64902		202.5	-72816.7	-61185.8	-54526.2	-80316	-72786.8	-66454.2	-60447.1	-56806.6	-64630.3	-49303.5
	202.6	-3.98235	-3.32087	-2.97787	-4.37591	-3.96461	-3.62668	-3.31215	-3.1297	-3.52011	-2.66872		202.6	-74119.5	-61808	-55424	-81444.4	-73789.4	-67499.7	-61645.6	-58250	-65516.2	-49670.2
	202.7	-4.05193	-3.35423	-3.02596	-4.43622	-4.01762	-3.68132	-3.3751	-3.20607	-3.56741	-2.68831		202.7	-75414.5	-62429	-56319.2	-82566.8	-74775.9	-68516.7	-62817.3	-59671.4	-66396.5	-50034.8
	202.8	-4.12101	-3.38752	-3.07396	-4.49613	-4.06961	-3.73439	-3.43658	-3.28091	-3.61438	-2.70806		202.8	-76700.3	-63048.4	-57212.5	-83681.9	-75743.5	-69504.3	-63961.5	-61064.3	-67270.9	-50402.3
	202.9	-4.18953	-3.42072	-3.12186	-4.55557	-4.12054	-3.78572	-3.49671	-3.35406	-3.66093	-2.72836		202.9	-77975.4	-63666.3	-58104	-84788.1	-76691.5	-70459.7	-65080.8	-62425.6	-68137.2	-50780.1
	203	-4.2574	-3.45377	-3.16973	-4.61438	-4.17039	-3.83522	-3.55559	-3.42552	-3.70711	-2.7494		203	-79238.6	-64281.5	-58994.9	-85882.8	-77619.3	-71381.1	-66176.7	-63755.7	-68996.6	-51171.8
	203.1	-4.32458	-3.48661	-3.21764	-4.67247	-4.21919	-3.88293	-3.61322	-3.49543	-3.75299	-2.7713		203.1	-80489.1	-64892.7	-59886.6	-86963.9	-78527.6	-72269	-67249.2	-65056.9	-69850.6	-51579.4
	203.2	-4.39108	-3.51924	-3.26562	-4.72978	-4.26699	-3.92888	-3.66953	-3.56373	-3.79867	-2.79403		203.2	-81726.7	-65500	-60779.6	-88030.5	-79417.2	-73124.3	-68297.2	-66328.1	-70700.9	-52002.5
	203.3	-4.45685	-3.5517	-3.31372	-4.78627	-4.31378	-3.97302	-3.72442	-3.63032	-3.8441	-2.81761		203.3	-82950.9	-66104.2	-61675	-89081.9	-80288	-73945.8	-69318.9	-67567.6	-71546.3	-52441.3
	203.4	-4.52184	-3.58406	-3.36199	-4.84195	-4.35955	-4.01525	-3.77787	-3.6953	-3.88917	-2.84215		203.4	-84160.4	-66706.6	-62573.3	-90118.3	-81139.8	-74731.8	-70313.8	-68776.9	-72385.2	-52898.1
	203.5	-4.58596	-3.61643	-3.41045	-4.89684	-4.40429	-4.05555	-3.82994	-3.75873	-3.93369	-2.86783		203.5	-85353.9	-67309	-63475.3	-91139.9	-81972.5	-75481.8	-71282.8	-69957.5	-73213.9	-53376
	203.6	-4.64912	-3.64886	-3.45918	-4.95098	-4.44798	-4.09391	-3.88058	-3.8205	-3.97775	-2.89467		203.6	-86529.3	-67912.6	-64382.2	-92147.5	-82785.7	-76195.9	-72225.4	-71107	-74033.8	-53875.6
	203.7	-4.71124	-3.6814	-3.50823	-5.00439	-4.49063	-4.13038	-3.92975	-3.88046	-4.02139	-2.92253		203.7	-87685.6	-68518.2	-65295.2	-93141.7	-83579.6	-76874.5	-73140.4	-72223	-74846.1	-54394.1
	203.8	-4.77233	-3.71413	-3.55762	-5.05705	-4.53227	-4.16494	-3.97736	-3.93853	-4.06448	-2.95136		203.8	-88822.5	-69127.3	-66214.4	-94121.7	-84354.5	-77517.8	-74026.6	-73303.8	-75648.1	-54930.7
	203.9	-4.83237	-3.7471	-3.60739	-5.10891	-4.57288	-4.19757	-4.02333	-3.99465	-4.10675	-2.98126		203.9	-89939.9	-69741	-67140.7	-95087	-85110.4	-78125.2	-74882.1	-74348.4	-76434.7	-55487.3
	204	-4.89137	-3.78039	-3.65758	-5.15992	-4.61239	-4.22839	-4.0676	-4.0488	-4.14794	-3.01223		204	-91038.2	-70360.6	-68074.9	-96036.5	-85845.7	-78698.8	-75706	-75356.2	-77201.3	-56063.6
	204.1	-4.94941	-3.81406	-3.70822	-5.21005	-4.65069	-4.25752	-4.11021	-4.10094	-4.18788	-3.04422		204.1	-92118.4	-70987.3	-69017.4	-96969.5	-86558.6	-79241	-76499.1	-76326.7	-77944.8	-56659.1
	204.2	-5.0065	-3.84814	-3.75935	-5.25926	-4.68771	-4.28506	-4.15122	-4.15106	-4.22638	-3.07709		204.2	-93180.9	-71621.6	-69969	-97885.2	-87247.6	-79753.5	-77262.4	-77259.5	-78661.3	-57270.8
	204.3	-5.06262	-3.88264	-3.81102	-5.30749	-4.72339	-4.31102	-4.19068	-4.19917	-4.26323	-3.11073		204.3	-94225.4	-72263.6	-70930.7	-98782.8	-87911.8	-80236.6	-77996.9	-78155	-79347.2	-57896.9
	204.4	-5.11777	-3.91758	-3.86325	-5.35473	-4.75771	-4.33533	-4.22863	-4.24532	-4.29837	-3.14498		204.4	-95251.9	-72914	-71902.7	-99662.2	-88550.4	-80689.1	-78703.2	-79013.9	-80001.2	-58534.4
	204.5	-5.172	-3.95301	-3.91603	-5.40101	-4.79063	-4.35797	-4.26508	-4.28959	-4.33171	-3.17965		204.5	-96261.2	-73573.4	-72885.2	-100524	-89163.2	-81110.4	-79381.6	-79837.8	-80621.7	-59179.6
	204.6	-5.22536	-3.98894	-3.96934	-5.44631	-4.82218	-4.37888	-4.30007	-4.33208	-4.36325	-3.21455		204.6	-97254.3	-74242.1	-73877.3	-101367	-89750.4	-81499.6	-80032.8	-80628.7	-81208.8	-59829.2
	204.7	-5.2779	-4.02536	-4.02321	-5.4906	-4.85239	-4.39807	-4.33359	-4.37278	-4.393	-3.24957		204.7	-98232.2	-74919.9	-74880	-102191	-90312.6	-81856.9	-80656.8	-81386.1	-81762.4	-60481
	204.8	-5.32967	-4.06225	-4.07777	-5.53385	-4.88127	-4.41557	-4.36567	-4.41168	-4.42089	-3.28461		204.8	-99195.8	-75606.5	-75895.5	-102996	-90850.1	-82182.5	-81253.8	-82110.1	-82281.5	-61133.2
	204.9	-5.38072	-4.09961	-4.13304	-5.57606	-4.90894	-4.43133	-4.39626	-4.44874	-4.44687	-3.31958		204.9	-100146	-76301.9	-76924	-103782	-91365.1	-82475.9	-81823.2	-82799.9	-82765	-61784
	205	-5.43101	-4.13745	-4.18897	-5.61725	-4.93549	-4.44535	-4.42535	-4.48387	-4.47087	-3.35441		205	-101082	-77006.2	-77965.1	-104548	-91859.4	-82736.8	-82364.5	-83453.8	-83211.8	-62432.3
	205.1	-5.48052	-4.1758	-4.24563	-5.6574	-4.96103	-4.4577	-4.45294	-4.51699	-4.4928	-3.389		205.1	-102003	-77719.9	-79019.6	-105295	-92334.6	-82966.6	-82878	-84070.2	-83620	-63076
	205.2	-5.52924	-4.21466	-4.30301	-5.69652	-4.9856	-4.4684	-4.47907	-4.54815	-4.51255	-3.42325		205.2	-102910	-78443.3	-80087.5	-106024	-92791.9	-83165.8	-83364.3	-84650.2	-83987.5	-63713.4
	205.3	-5.57717	-4.2541	-4.36111	-5.73463	-5.00923	-4.47748	-4.50377	-4.5774	-4.53004	-3.45703		205.3	-103802	-79177.3	-81169	-106733	-93231.7	-83334.8	-83824	-85194.5	-84313.1	-64342.3
	205.4	-5.62432	-4.29413	-4.41994	-5.77173	-5.03196	-4.485	-4.52708	-4.60476	-4.54532	-3.49015		205.4	-104680	-79922.3	-82263.9	-107423	-93654.7	-83474.7	-84257.9	-85703.8	-84597.4	-64958.7
	205.5	-5.67078	-4.33477	-4.47947	-5.80783	-5.05377	-4.49104	-4.54902	-4.63028	-4.55849	-3.52247		205.5	-105545	-80678.6	-83371.8	-108095	-94060.8	-83587.1	-84666.2	-86178.7	-84842.5	-65560.2
	205.6	-5.7166	-4.37603	-4.5397	-5.84294	-5.07463	-4.49574	-4.56963	-4.65398	-4.56964	-3.55389		205.6	-106397	-81446.5	-84492.8	-108749	-94449	-83674.6	-85049.9	-86619.8	-85050.1	-66145
	205.7	-5.76183	-4.41797	-4.60066	-5.87708	-5.0945	-4.49924	-4.58895	-4.67592	-4.57886	-3.58435		205.7	-107239	-82227.1	-85627.5	-109384	-94818.7	-83739.8	-85409.4	-87028.1	-85221.6	-66711.8
	205.8	-5.80652	-4.46063	-4.66238	-5.91026	-5.11334	-4.50164	-4.60698	-4.69618	-4.58623	-3.61383		205.8	-108071	-83021.2	-86776.1	-110002	-95169.3	-83784.5	-85745	-87405.2	-85358.9	-67260.6
	205.9	-5.85067	-4.504	-4.72486	-5.94247	-5.13117	-4.50306	-4.62371	-4.71482	-4.59185	-3.6424		205.9	-108893	-83828.4	-87939	-110601	-95501.2	-83811	-86056.4	-87752.3	-85463.5	-67792.3
	206	-5.89431	-4.54807	-4.78807	-5.97375	-5.14799	-4.50356	-4.63908	-4.73193	-4.59576	-3.67011		206	-109705	-84648.5	-89115.6	-111183	-95814.4	-83820.2	-86342.6	-88070.6	-85536.2	-68308
	206.1	-5.93749	-4.5928	-4.85194	-6.00412	-5.16392	-4.50322	-4.65309	-4.74759	-4.59799	-3.69698		206.1	-110508	-85481.1	-90304.3	-111749	-96110.7	-83813.9	-86603.2	-88362.1	-85577.7	-68808.1
	206.2	-5.98029	-4.63815	-4.91637	-6.03367	-5.17905	-4.50212	-4.66573	-4.76192	-4.59864	-3.72298		206.2	-111305	-86325.1	-91503.5	-112299	-96392.3	-83793.4	-86838.6	-88628.8	-85589.8	-69292
	206.3	-6.02276	-4.6841	-4.98126	-6.06247	-5.19348	-4.50033	-4.67699	-4.77502	-4.59778	-3.74802		206.3	-112096	-87180.5	-92711.1	-112835	-96661	-83760.1	-87048.1	-88872.6	-85573.8	-69758.2
	206.4	-6.06495	-4.7307	-5.0465	-6.09056	-5.20724	-4.49797	-4.68685	-4.78696	-4.59544	-3.77209		206.4	-112881	-88047.8	-93925.5	-113357	-96917.1	-83716.1	-87231.6	-89094.9	-85530.4	-70206
	206.5	-6.10684	-4.77793	-5.11203	-6.11794	-5.22039	-4.4951	-4.69531	-4.79785	-4.59171	-3.79517		206.5	-113660	-88926.8	-95145.1	-113867	-97161.8	-83662.7	-87389.1	-89297.5	-85460.9	-70635.6
	206.6	-6.14843	-4.82583	-5.17775	-6.14456	-5.23295	-4.4918	-4.7024	-4.80777	-4.58665	-3.81728		206.6	-114435	-89818.2	-96368.3	-114362	-97395.6	-83601.4	-87521	-89482.2	-85366.7	-71047.1
	206.7	-6.18975	-4.87441	-5.24352	-6.17041	-5.2449	-4.48811	-4.70814	-4.81678	-4.58031	-3.83845		206.7	-115204	-90722.4	-97592.3	-114844	-97618.1	-83532.7	-87627.9	-89649.8	-85248.6	-71441.2
	206.8	-6.23082	-4.92369	-5.30919	-6.19551	-5.25619	-4.48411	-4.7126	-4.82491	-4.57273	-3.85864		206.8	-115968	-91639.6	-98814.7	-115311	-97828.1	-83458.3	-87710.8	-89801.1	-85107.6	-71816.9
	206.9	-6.27168	-4.97369	-5.37464	-6.21986	-5.2668	-4.47988	-4.71586	-4.83225	-4.56391	-3.87771		206.9	-116729	-92570.2	-100033	-115764	-98025.6	-83379.4	-87771.5	-89937.8	-84943.4	-72171.8
	207	-6.31237	-5.02444	-5.43973	-6.24346	-5.27673	-4.47549	-4.71799	-4.83889	-4.55386	-3.89558		207	-117486	-93514.7	-101244	-116203	-98210.4	-83297.8	-87811.1	-90061.4	-84756.5	-72504.4
	207.1	-6.35288	-5.07592	-5.50436	-6.26629	-5.28598	-4.47102	-4.71904	-4.84489	-4.54265	-3.91221		207.1	-118240	-94472.9	-102447	-116628	-98382.5	-83214.5	-87830.8	-90173.1	-84547.7	-72814
	207.2	-6.3932	-5.12814	-5.56842	-6.28834	-5.29455	-4.46649	-4.7191	-4.85029	-4.53032	-3.9276		207.2	-118990	-95444.9	-103639	-117038	-98542	-83130.3	-87831.8	-90273.5	-84318.3	-73100.5
	207.3	-6.4333	-5.18114	-5.63182	-6.30964	-5.30244	-4.46191	-4.71822	-4.85508	-4.51703	-3.94178		207.3	-119736	-96431.3	-104819	-117435	-98688.9	-83045	-87815.4	-90362.7	-84070.9	-73364.3
	207.4	-6.47314	-5.23493	-5.69449	-6.33028	-5.30967	-4.45722	-4.71642	-4.85925	-4.50291	-3.95478		207.4	-120478	-97432.5	-105986	-117819	-98823.5	-82957.7	-87781.9	-90440.4	-83808.2	-73606.3
	207.5	-6.51271	-5.28957	-5.75638	-6.35035	-5.31626	-4.45241	-4.71372	-4.86279	-4.4881	-3.96668		207.5	-121214	-98449.4	-107138	-118193	-98946.2	-82868.1	-87731.6	-90506.3	-83532.5	-73827.7
	207.6	-6.55203	-5.34509	-5.81738	-6.36994	-5.32224	-4.44752	-4.71011	-4.86572	-4.47268	-3.97753		207.6	-121946	-99482.7	-108273	-118557	-99057.4	-82777.1	-87664.6	-90560.7	-83245.5	-74029.7
	207.7	-6.59109	-5.40151	-5.87741	-6.38917	-5.32765	-4.44263	-4.70564	-4.86804	-4.45674	-3.98741		207.7	-122673	-100533	-109390	-118915	-99158.2	-82686.1	-87581.2	-90603.8	-82948.7	-74213.6
	207.8	-6.62992	-5.45882	-5.93639	-6.40818	-5.33257	-4.43783	-4.70035	-4.86976	-4.44034	-3.99635		207.8	-123396	-101599	-110488	-119269	-99249.8	-82596.8	-87482.8	-90635.8	-82643.6	-74380
	207.9	-6.66855	-5.51702	-5.99424	-6.42703	-5.33705	-4.43322	-4.69431	-4.87086	-4.42355	-4.00437		207.9	-124115	-102683	-111565	-119620	-99333	-82511	-87370.3	-90656.4	-82331.1	-74529.2
	208	-6.70698	-5.57606	-6.05087	-6.44584	-5.34111	-4.42887	-4.68759	-4.87132	-4.40637	-4.01145		208	-124830	-103781	-112619	-119970	-99408.6	-82430	-87245.4	-90664.9	-82011.2	-74661
	208.1	-6.74524	-5.6359	-6.10617	-6.46467	-5.3448	-4.42485	-4.68029	-4.87107	-4.38877	-4.0176		208.1	-125542	-104895	-113648	-120320	-99477.4	-82355.3	-87109.5	-90660.4	-81683.8	-74775.6
	208.2	-6.78334	-5.6965	-6.16008	-6.48357	-5.34815	-4.42127	-4.6725	-4.87009	-4.3708	-4.02287		208.2	-126252	-106023	-114651	-120672	-99539.7	-82288.5	-86964.5	-90642	-81349.3	-74873.5
	208.3	-6.82132	-5.7578	-6.2126	-6.50257	-5.35116	-4.4182	-4.6643	-4.86839	-4.35248	-4.0273		208.3	-126958	-107164	-115629	-121026	-99595.8	-82231.6	-86811.8	-90610.4	-81008.3	-74956
	208.4	-6.85922	-5.81971	-6.26371	-6.52171	-5.35388	-4.41572	-4.65572	-4.86599	-4.33385	-4.03095		208.4	-127664	-108316	-116580	-121382	-99646.3	-82185.4	-86652.2	-90565.8	-80661.5	-75024
	208.5	-6.89707	-5.88217	-6.31338	-6.54104	-5.35635	-4.41392	-4.64678	-4.86297	-4.31498	-4.0338		208.5	-128368	-109479	-117505	-121742	-99692.2	-82151.8	-86485.8	-90509.6	-80310.4	-75077
	208.6	-6.93489	-5.94513	-6.36162	-6.5606	-5.35859	-4.41286	-4.63747	-4.8594	-4.29596	-4.0359		208.6	-129072	-110651	-118402	-122106	-99734	-82132	-86312.5	-90443.2	-79956.4	-75116
	208.7	-6.97262	-6.00851	-6.40838	-6.58041	-5.36064	-4.41258	-4.62778	-4.85536	-4.2769	-4.03731		208.7	-129774	-111830	-119273	-122475	-99772.1	-82126.9	-86132.2	-90367.9	-79601.6	-75142.3
	208.8	-7.01024	-6.07221	-6.45362	-6.60048	-5.36253	-4.41315	-4.61775	-4.85087	-4.25783	-4.03811		208.8	-130475	-113016	-120115	-122848	-99807.4	-82137.5	-85945.4	-90284.3	-79246.7	-75157.3
	208.9	-7.04779	-6.13612	-6.49728	-6.6208	-5.36437	-4.41463	-4.60735	-4.84593	-4.23877	-4.03847		208.9	-131173	-114205	-120927	-123226	-99841.5	-82165.1	-85752	-90192.4	-78892	-75163.9
	209	-7.08531	-6.20014	-6.53928	-6.64138	-5.36621	-4.41706	-4.59662	-4.84058	-4.21971	-4.03851		209	-131872	-115397	-121709	-123609	-99875.8	-82210.2	-85552.2	-90092.7	-78537.2	-75164.6
	209.1	-7.12285	-6.26418	-6.57959	-6.66222	-5.3681	-4.42043	-4.58561	-4.83484	-4.20062	-4.03829		209.1	-132570	-116589	-122459	-123997	-99911	-82272.9	-85347.3	-89986	-78181.9	-75160.7
	209.2	-7.16044	-6.32823	-6.61811	-6.68333	-5.37011	-4.42476	-4.57442	-4.82879	-4.18149	-4.03791		209.2	-133270	-117781	-123176	-124390	-99948.5	-82353.6	-85139.1	-89873.4	-77825.9	-75153.4
	209.3	-7.19809	-6.39229	-6.65482	-6.70477	-5.37234	-4.43007	-4.56314	-4.8225	-4.16233	-4.0374		209.3	-133971	-118973	-123860	-124789	-99990	-82452.4	-84929.2	-89756.4	-77469.3	-75144.1
	209.4	-7.23577	-6.45639	-6.68969	-6.72655	-5.37482	-4.43641	-4.55183	-4.81605	-4.1431	-4.03682		209.4	-134672	-120166	-124509	-125194	-100036	-82570.5	-84718.6	-89636.3	-77111.3	-75133.2
	209.5	-7.27349	-6.52054	-6.72271	-6.74867	-5.37755	-4.44386	-4.54053	-4.80946	-4.1238	-4.03621		209.5	-135374	-121360	-125123	-125606	-100087	-82709	-84508.3	-89513.6	-76752.1	-75121.8
	209.6	-7.31124	-6.58469	-6.75387	-6.77107	-5.38052	-4.45246	-4.52934	-4.80274	-4.10449	-4.03562		209.6	-136077	-122554	-125703	-126023	-100142	-82869.2	-84300.1	-89388.6	-76392.6	-75110.9
	209.7	-7.349	-6.64881	-6.78315	-6.79368	-5.38372	-4.46225	-4.51835	-4.79587	-4.08517	-4.03505		209.7	-136780	-123748	-126248	-126444	-100202	-83051.3	-84095.4	-89260.6	-76033.1	-75100.3
	209.8	-7.38679	-6.71287	-6.81058	-6.81651	-5.38709	-4.47326	-4.5076	-4.78875	-4.06582	-4.03449		209.8	-137483	-124940	-126758	-126869	-100264	-83256.3	-83895.4	-89128.2	-75673	-75089.9
	209.9	-7.42461	-6.77682	-6.83621	-6.83955	-5.39059	-4.4856	-4.49721	-4.78136	-4.04642	-4.03393		209.9	-138187	-126130	-127235	-127298	-100330	-83485.9	-83702.1	-88990.7	-75311.9	-75079.4
	210	-7.46248	-6.84063	-6.86008	-6.8628	-5.39421	-4.49931	-4.48732	-4.77373	-4.02703	-4.03335		210	-138892	-127318	-127680	-127730	-100397	-83741.1	-83517.9	-88848.5	-74951.1	-75068.7
	210.1	-7.50036	-6.9042	-6.8823	-6.88622	-5.39798	-4.51443	-4.47799	-4.76587	-4.00774	-4.0328		210.1	-139597	-128501	-128093	-128166	-100467	-84022.5	-83344.3	-88702.3	-74592.1	-75058.5
	210.2	-7.53827	-6.96747	-6.90295	-6.90982	-5.40189	-4.53098	-4.46925	-4.75783	-3.98866	-4.0323		210.2	-140302	-129678	-128478	-128605	-100540	-84330.5	-83181.7	-88552.7	-74237	-75049.1
	210.3	-7.57616	-7.03036	-6.92213	-6.93361	-5.40599	-4.54895	-4.46107	-4.74962	-3.96986	-4.03184		210.3	-141007	-130849	-128835	-129048	-100616	-84665	-83029.3	-88399.9	-73887	-75040.5
	210.4	-7.61403	-7.09277	-6.93991	-6.95762	-5.41032	-4.56834	-4.45341	-4.74126	-3.95138	-4.03136		210.4	-141712	-132011	-129166	-129495	-100697	-85025.9	-82886.7	-88244.3	-73543.1	-75031.7
	210.5	-7.6519	-7.1546	-6.95638	-6.98185	-5.4149	-4.58915	-4.44627	-4.73275	-3.93327	-4.0308		210.5	-142417	-133161	-129472	-129946	-100782	-85413.2	-82754	-88085.9	-73205.9	-75021.2
	210.6	-7.68978	-7.21573	-6.97158	-7.00628	-5.41977	-4.61137	-4.43968	-4.72413	-3.9155	-4.0301		210.6	-143122	-134299	-129755	-130401	-100873	-85826.8	-82631.3	-87925.4	-72875.3	-75008.1
	210.7	-7.72768	-7.27607	-6.98558	-7.03087	-5.42497	-4.63497	-4.43364	-4.71541	-3.89807	-4.02923		210.7	-143827	-135422	-130016	-130858	-100970	-86266.1	-82518.8	-87763.2	-72550.9	-74991.9
	210.8	-7.76558	-7.33551	-6.99844	-7.05559	-5.43054	-4.65993	-4.42815	-4.70658	-3.88093	-4.02814		210.8	-144533	-136528	-130255	-131319	-101073	-86730.6	-82416.7	-87598.9	-72231.8	-74971.7
	210.9	-7.80346	-7.39395	-7.01023	-7.08038	-5.43649	-4.6862	-4.42323	-4.6976	-3.86406	-4.0268		210.9	-145238	-137616	-130474	-131780	-101184	-87219.5	-82325.1	-87431.7	-71917.9	-74946.8
	211	-7.8413	-7.45125	-7.02102	-7.10517	-5.44286	-4.71374	-4.41884	-4.68843	-3.84749	-4.02519		211	-145942	-138683	-130675	-132241	-101302	-87732.1	-82243.4	-87261.1	-71609.5	-74916.8
	211.1	-7.87907	-7.50734	-7.03095	-7.12987	-5.44958	-4.74248	-4.41495	-4.67908	-3.83128	-4.02326		211.1	-146645	-139726	-130860	-132701	-101428	-88267	-82171.1	-87087	-71307.6	-74880.9
	211.2	-7.91673	-7.56211	-7.04014	-7.15443	-5.45663	-4.77236	-4.41149	-4.66954	-3.81546	-4.02099		211.2	-147346	-140746	-131031	-133158	-101559	-88823.1	-82106.7	-86909.4	-71013.4	-74838.6
	211.3	-7.95427	-7.61555	-7.04867	-7.17877	-5.46397	-4.80333	-4.40845	-4.65984	-3.80011	-4.01837		211.3	-148045	-141741	-131190	-133611	-101695	-89399.5	-82050.1	-86728.9	-70727.5	-74789.9
	211.4	-7.99166	-7.66761	-7.05663	-7.20283	-5.47157	-4.83531	-4.40584	-4.65	-3.78527	-4.01544		211.4	-148741	-142709	-131338	-134059	-101837	-89994.7	-82001.5	-86545.8	-70451.4	-74735.2
	211.5	-8.02886	-7.71824	-7.06412	-7.22654	-5.47938	-4.86822	-4.40367	-4.64005	-3.771	-4.01211		211.5	-149433	-143652	-131477	-134500	-101982	-90607.2	-81961.1	-86360.6	-70185.8	-74673.3
	211.6	-8.06584	-7.76746	-7.07122	-7.2499	-5.48741	-4.90195	-4.40196	-4.63004	-3.75729	-4.00837		211.6	-150121	-144568	-131609	-134935	-102132	-91235	-81929.2	-86174.3	-69930.7	-74603.8
	211.7	-8.10259	-7.81526	-7.07799	-7.27291	-5.49567	-4.93645	-4.40071	-4.62002	-3.74409	-4.00427		211.7	-150805	-145457	-131736	-135363	-102285	-91877.1	-81905.9	-85987.8	-69684.9	-74527.5
	211.8	-8.13907	-7.86159	-7.08452	-7.29553	-5.50421	-4.97163	-4.39994	-4.61002	-3.73129	-3.99989		211.8	-151484	-146320	-131857	-135784	-102444	-92531.9	-81891.7	-85801.7	-69446.7	-74445.9
	211.9	-8.17528	-7.90642	-7.09087	-7.31774	-5.51307	-5.00741	-4.39971	-4.60006	-3.71884	-3.99524		211.9	-152158	-147154	-131975	-136198	-102609	-93197.9	-81887.4	-85616.2	-69215	-74359.4
	212	-8.21119	-7.94971	-7.09715	-7.33954	-5.52223	-5.04375	-4.40005	-4.59013	-3.70669	-3.9903		212	-152827	-147960	-132092	-136603	-102780	-93874.1	-81893.6	-85431.5	-68988.9	-74267.3
	212.1	-8.24679	-7.99147	-7.10348	-7.36094	-5.53171	-5.08058	-4.40096	-4.58028	-3.6948	-3.98504		212.1	-153489	-148737	-132210	-137002	-102956	-94559.7	-81910.6	-85248.1	-68767.6	-74169.5
	212.2	-8.28204	-8.03176	-7.10995	-7.38192	-5.54145	-5.11781	-4.40247	-4.57049	-3.68315	-3.97945		212.2	-154145	-149487	-132330	-137392	-103137	-95252.6	-81938.7	-85065.9	-68550.7	-74065.5
	212.3	-8.31688	-8.07064	-7.11665	-7.40251	-5.55146	-5.15536	-4.4046	-4.56078	-3.67172	-3.97349		212.3	-154794	-150211	-132455	-137775	-103324	-95951.4	-81978.4	-84885.2	-68338.1	-73954.6
	212.4	-8.35125	-8.10817	-7.12364	-7.42275	-5.56171	-5.19315	-4.40737	-4.55115	-3.66054	-3.96713		212.4	-155433	-150909	-132585	-138152	-103514	-96654.8	-82030	-84705.9	-68129.9	-73836.1
	212.5	-8.38515	-8.14435	-7.13096	-7.44262	-5.57215	-5.23111	-4.41076	-4.54158	-3.64958	-3.96034		212.5	-156064	-151583	-132721	-138522	-103709	-97361.4	-82093.1	-84527.8	-67925.9	-73709.7
	212.6	-8.41859	-8.17916	-7.13868	-7.46207	-5.58276	-5.26917	-4.41476	-4.53208	-3.63883	-3.95306		212.6	-156687	-152230	-132865	-138884	-103906	-98069.7	-82167.5	-84351	-67725.9	-73574.4
	212.7	-8.45156	-8.21258	-7.14685	-7.48107	-5.5935	-5.30725	-4.41936	-4.52264	-3.62829	-3.94528		212.7	-157300	-152852	-133017	-139238	-104106	-98778.5	-82253	-84175.3	-67529.7	-73429.5
	212.8	-8.48405	-8.24464	-7.15553	-7.49961	-5.60436	-5.34525	-4.42449	-4.51324	-3.61795	-3.93697		212.8	-157905	-153449	-133179	-139583	-104308	-99485.7	-82348.6	-84000.4	-67337.2	-73274.8
	212.9	-8.51601	-8.27538	-7.1648	-7.51767	-5.61531	-5.38306	-4.43012	-4.50388	-3.60779	-3.92811		212.9	-158500	-154021	-133351	-139919	-104512	-100190	-82453.3	-83826.1	-67148.1	-73109.9
	213	-8.54747	-8.30483	-7.17472	-7.53526	-5.62636	-5.42061	-4.43616	-4.49455	-3.59784	-3.91868		213	-159085	-154569	-133536	-140246	-104718	-100888	-82565.7	-83652.6	-66963	-72934.4
	213.1	-8.57843	-8.33301	-7.1853	-7.55238	-5.63754	-5.4578	-4.44255	-4.4853	-3.58815	-3.90869		213.1	-159662	-155094	-133733	-140565	-104926	-101580	-82684.7	-83480.3	-66782.5	-72748.5
	213.2	-8.6089	-8.35994	-7.19654	-7.56899	-5.64889	-5.4945	-4.4492	-4.47612	-3.57874	-3.89812		213.2	-160229	-155595	-133942	-140874	-105137	-102264	-82808.4	-83309.4	-66607.5	-72551.8
	213.3	-8.63886	-8.38566	-7.20847	-7.5851	-5.66045	-5.53061	-4.45603	-4.46699	-3.56961	-3.88698		213.3	-160786	-156074	-134164	-141174	-105352	-102936	-82935.5	-83139.6	-66437.6	-72344.5
	213.4	-8.66834	-8.41022	-7.22108	-7.60071	-5.67225	-5.56604	-4.46299	-4.45791	-3.56073	-3.87522		213.4	-161335	-156531	-134399	-141464	-105572	-103595	-83065.1	-82970.5	-66272.2	-72125.6
	213.5	-8.69731	-8.4336	-7.23435	-7.61579	-5.68436	-5.60072	-4.47005	-4.44888	-3.55208	-3.8628		213.5	-161874	-156966	-134646	-141745	-105797	-104241	-83196.6	-82802.6	-66111.2	-71894.5
	213.6	-8.72579	-8.45587	-7.24828	-7.63028	-5.69678	-5.63458	-4.47721	-4.43994	-3.54365	-3.84973		213.6	-162404	-157381	-134905	-142015	-106028	-104871	-83329.8	-82636	-65954.4	-71651.1
	213.7	-8.75379	-8.47706	-7.26289	-7.64415	-5.7095	-5.66757	-4.48445	-4.43105	-3.53543	-3.83603		213.7	-162925	-157775	-135177	-142273	-106265	-105485	-83464.4	-82470.7	-65801.3	-71396.2
	213.8	-8.7813	-8.49721	-7.27818	-7.65735	-5.72247	-5.69963	-4.49175	-4.42223	-3.52737	-3.82181		213.8	-163437	-158150	-135461	-142518	-106507	-106081	-83600.4	-82306.4	-65651.4	-71131.6
	213.9	-8.8083	-8.5164	-7.29418	-7.66986	-5.73566	-5.73071	-4.4991	-4.41344	-3.5195	-3.80715		213.9	-163940	-158507	-135759	-142751	-106752	-106660	-83737.2	-82143	-65504.8	-70858.7
	214	-8.83478	-8.53464	-7.31091	-7.68163	-5.74902	-5.76076	-4.50648	-4.40468	-3.51181	-3.7921		214	-164433	-158847	-136071	-142970	-107001	-107219	-83874.6	-81979.9	-65361.8	-70578.6
	214.1	-8.86073	-8.55196	-7.3284	-7.69263	-5.76251	-5.78975	-4.51386	-4.39595	-3.50434	-3.77672		214.1	-164916	-159169	-136396	-143175	-107252	-107759	-84011.9	-81817.3	-65222.8	-70292.3
	214.2	-8.88617	-8.56841	-7.34662	-7.70284	-5.77608	-5.81758	-4.52121	-4.38728	-3.49712	-3.76106		214.2	-165389	-159475	-136735	-143365	-107504	-108277	-84148.7	-81655.9	-65088.3	-70000.9
	214.3	-8.91105	-8.58403	-7.36555	-7.71222	-5.78971	-5.84422	-4.5285	-4.37868	-3.49017	-3.7452		214.3	-165852	-159766	-137088	-143540	-107758	-108772	-84284.4	-81495.9	-64958.9	-69705.5
	214.4	-8.93536	-8.59884	-7.38517	-7.72075	-5.80339	-5.86963	-4.53573	-4.37015	-3.48353	-3.72917		214.4	-166305	-160042	-137453	-143698	-108013	-109245	-84418.9	-81337.2	-64835.4	-69407.2
	214.5	-8.95907	-8.61287	-7.40541	-7.72841	-5.81712	-5.8938	-4.54289	-4.3617	-3.47721	-3.71305		214.5	-166746	-160303	-137829	-143841	-108268	-109695	-84552.2	-81179.9	-64717.8	-69107.3
	214.6	-8.98217	-8.62614	-7.42625	-7.7352	-5.83085	-5.9167	-4.54995	-4.35332	-3.47123	-3.69688		214.6	-167176	-160550	-138217	-143967	-108524	-110122	-84683.5	-81023.9	-64606.4	-68806.3
	214.7	-9.00465	-8.63866	-7.44764	-7.74108	-5.84455	-5.9383	-4.55687	-4.34501	-3.46559	-3.68071		214.7	-167594	-160783	-138615	-144077	-108779	-110524	-84812.4	-80869.2	-64501.4	-68505.2
	214.8	-9.02647	-8.65048	-7.46953	-7.74606	-5.85823	-5.95858	-4.56362	-4.33675	-3.46029	-3.66457		214.8	-168000	-161003	-139023	-144170	-109033	-110901	-84938	-80715.6	-64403	-68204.9
	214.9	-9.04758	-8.66163	-7.49184	-7.75012	-5.87191	-5.97755	-4.57017	-4.32852	-3.45535	-3.64849		214.9	-168393	-161210	-139438	-144245	-109288	-111254	-85059.9	-80562.4	-64311	-67905.6
	215	-9.06795	-8.67213	-7.51451	-7.75327	-5.88554	-5.9952	-4.57652	-4.32027	-3.45077	-3.63246		215	-168773	-161406	-139860	-144304	-109542	-111583	-85178.1	-80408.8	-64225.7	-67607.4
	215.1	-9.08756	-8.68203	-7.5375	-7.75553	-5.89912	-6.01148	-4.58265	-4.31195	-3.44659	-3.61648		215.1	-169138	-161590	-140288	-144346	-109794	-111886	-85292.2	-80253.9	-64147.9	-67309.8
	215.2	-9.10635	-8.69136	-7.56069	-7.75685	-5.91258	-6.02639	-4.58852	-4.30351	-3.44286	-3.60054		215.2	-169487	-161763	-140720	-144370	-110045	-112163	-85401.5	-80096.8	-64078.4	-67013.2
	215.3	-9.12429	-8.70017	-7.58403	-7.75722	-5.92589	-6.03989	-4.59407	-4.29487	-3.43957	-3.58468		215.3	-169821	-161927	-141154	-144377	-110293	-112414	-85504.8	-79936	-64017.3	-66718
	215.4	-9.14137	-8.70847	-7.60746	-7.75661	-5.939	-6.05194	-4.59927	-4.28595	-3.43671	-3.56889		215.4	-170139	-162082	-141590	-144366	-110537	-112639	-85601.5	-79770	-63964.1	-66424.1
	215.5	-9.15754	-8.71628	-7.63091	-7.75504	-5.95186	-6.0625	-4.60405	-4.27668	-3.43426	-3.55317		215.5	-170440	-162227	-142026	-144337	-110776	-112835	-85690.5	-79597.5	-63918.3	-66131.6
	215.6	-9.17278	-8.72359	-7.65433	-7.7525	-5.96441	-6.07158	-4.60836	-4.26701	-3.43217	-3.53753		215.6	-170724	-162363	-142462	-144289	-111010	-113004	-85770.8	-79417.5	-63879.5	-65840.4
	215.7	-9.18707	-8.73038	-7.67766	-7.74897	-5.97661	-6.07921	-4.61213	-4.25691	-3.43044	-3.52197		215.7	-170990	-162490	-142897	-144224	-111236	-113146	-85840.9	-79229.5	-63847.3	-65550.8
	215.8	-9.20038	-8.73667	-7.70088	-7.74445	-5.98842	-6.08541	-4.61527	-4.24636	-3.42907	-3.50651		215.8	-171237	-162607	-143329	-144140	-111456	-113262	-85899.3	-79033.1	-63821.9	-65263.1
	215.9	-9.21269	-8.74246	-7.72396	-7.73898	-5.99984	-6.09021	-4.61773	-4.23533	-3.4281	-3.49119		215.9	-171466	-162715	-143758	-144038	-111669	-113351	-85945.1	-78828	-63803.8	-64978
	216	-9.224	-8.74775	-7.74684	-7.73257	-6.01081	-6.0936	-4.61949	-4.22378	-3.42755	-3.47605		216	-171677	-162813	-144184	-143918	-111873	-113414	-85977.8	-78612.9	-63793.6	-64696.1
	216.1	-9.2343	-8.75248	-7.76946	-7.7252	-6.02131	-6.09561	-4.62054	-4.21164	-3.42741	-3.46107		216.1	-171869	-162901	-144605	-143781	-112068	-113451	-85997.5	-78387	-63790.9	-64417.5
	216.2	-9.2436	-8.75663	-7.79176	-7.7169	-6.03127	-6.09624	-4.62088	-4.19889	-3.42763	-3.44628		216.2	-172042	-162978	-145020	-143627	-112254	-113463	-86003.8	-78149.6	-63795	-64142.2
	216.3	-9.25188	-8.76013	-7.81367	-7.70771	-6.04066	-6.0955	-4.62046	-4.18548	-3.42818	-3.43169		216.3	-172196	-163044	-145428	-143456	-112429	-113449	-85996	-77900.1	-63805.2	-63870.5
	216.4	-9.25912	-8.76299	-7.83513	-7.69765	-6.04945	-6.09341	-4.61928	-4.1714	-3.42898	-3.41728		216.4	-172331	-163097	-145827	-143269	-112592	-113410	-85974	-77638	-63820.2	-63602.3
	216.5	-9.26529	-8.76517	-7.85606	-7.68675	-6.05759	-6.08999	-4.61732	-4.15662	-3.43	-3.40305		216.5	-172445	-163137	-146217	-143066	-112744	-113347	-85937.5	-77363	-63839.2	-63337.6
	216.6	-9.27039	-8.76659	-7.87639	-7.67504	-6.06504	-6.0853	-4.61457	-4.14114	-3.43119	-3.38902		216.6	-172540	-163164	-146595	-142848	-112882	-113260	-85886.4	-77074.8	-63861.2	-63076.5
	216.7	-9.27439	-8.76717	-7.89608	-7.6625	-6.07176	-6.07939	-4.61103	-4.12493	-3.4325	-3.37521		216.7	-172615	-163174	-146962	-142614	-113008	-113150	-85820.4	-76773.1	-63885.6	-62819.4
	216.8	-9.27727	-8.76688	-7.91511	-7.64913	-6.07773	-6.07228	-4.60667	-4.10796	-3.43387	-3.36166		216.8	-172669	-163169	-147316	-142366	-113119	-113017	-85739.3	-76457.2	-63911.2	-62567.3
	216.9	-9.27904	-8.76567	-7.93345	-7.63494	-6.08291	-6.06397	-4.6015	-4.09016	-3.43527	-3.34837		216.9	-172701	-163147	-147657	-142101	-113215	-112863	-85643.1	-76126.1	-63937.3	-62319.9
	217	-9.27964	-8.76352	-7.95104	-7.61995	-6.08732	-6.05448	-4.59554	-4.07152	-3.43666	-3.33531		217	-172713	-163106	-147985	-141822	-113297	-112686	-85532.2	-75779.1	-63963	-62076.7
	217.1	-9.27905	-8.7604	-7.96783	-7.60413	-6.09094	-6.04377	-4.58879	-4.05204	-3.43801	-3.32242		217.1	-172702	-163048	-148297	-141528	-113364	-112487	-85406.5	-75416.6	-63988.2	-61836.9
	217.2	-9.27724	-8.75628	-7.98373	-7.58747	-6.09377	-6.03182	-4.58124	-4.03176	-3.43932	-3.30966		217.2	-172668	-162972	-148593	-141218	-113417	-112264	-85266	-75039.1	-64012.6	-61599.3
	217.3	-9.27418	-8.75113	-7.99865	-7.56999	-6.09582	-6.01862	-4.57287	-4.01072	-3.44056	-3.29694		217.3	-172611	-162876	-148871	-140893	-113455	-112019	-85110.2	-74647.4	-64035.7	-61362.7
	217.4	-9.26983	-8.74492	-8.01247	-7.55169	-6.09708	-6.00418	-4.56365	-3.98894	-3.44168	-3.28425		217.4	-172530	-162760	-149128	-140552	-113479	-111750	-84938.5	-74242.2	-64056.4	-61126.4
	217.5	-9.26415	-8.73765	-8.02511	-7.53257	-6.09754	-5.98854	-4.55356	-3.96648	-3.44263	-3.27154		217.5	-172424	-162625	-149363	-140196	-113487	-111459	-84750.9	-73824	-64074.2	-60889.9
	217.6	-9.25715	-8.72926	-8.03649	-7.51264	-6.09717	-5.97171	-4.54261	-3.94334	-3.44337	-3.2588		217.6	-172294	-162469	-149575	-139825	-113480	-111145	-84546.9	-73393.4	-64087.9	-60652.7
	217.7	-9.24879	-8.71972	-8.04651	-7.49189	-6.09597	-5.95371	-4.53077	-3.91954	-3.4438	-3.24596		217.7	-172138	-162291	-149761	-139439	-113458	-110810	-84326.7	-72950.4	-64095.9	-60413.8
	217.8	-9.23905	-8.70901	-8.05507	-7.47031	-6.09392	-5.93454	-4.51804	-3.89507	-3.44382	-3.23301		217.8	-171957	-162092	-149921	-139037	-113420	-110454	-84089.8	-72495.1	-64096.3	-60172.8
	217.9	-9.22788	-8.69713	-8.06211	-7.44789	-6.09101	-5.91422	-4.50444	-3.86996	-3.44334	-3.21992		217.9	-171749	-161871	-150052	-138620	-113366	-110075	-83836.5	-72027.6	-64087.4	-59929.1
	218	-9.21521	-8.68403	-8.06756	-7.42462	-6.08726	-5.89277	-4.48996	-3.84421	-3.44227	-3.20664		218	-171513	-161627	-150153	-138187	-113296	-109676	-83567	-71548.4	-64067.4	-59681.9
	218.1	-9.20096	-8.66966	-8.07136	-7.40048	-6.08263	-5.8702	-4.47463	-3.81785	-3.4405	-3.19314		218.1	-171248	-161360	-150224	-137738	-113210	-109256	-83281.7	-71057.8	-64034.6	-59430.7
	218.2	-9.18507	-8.65395	-8.07346	-7.37544	-6.07711	-5.84652	-4.45848	-3.7909	-3.43801	-3.17942		218.2	-170952	-161067	-150263	-137272	-113107	-108815	-82981.1	-70556.3	-63988.2	-59175.4
	218.3	-9.16747	-8.63685	-8.07383	-7.34946	-6.07065	-5.82174	-4.4415	-3.76337	-3.43471	-3.16545		218.3	-170625	-160749	-150270	-136788	-112987	-108354	-82665.2	-70043.8	-63926.9	-58915.3
	218.4	-9.14812	-8.6183	-8.07239	-7.32246	-6.06319	-5.79585	-4.42371	-3.73523	-3.43056	-3.15118		218.4	-170265	-160404	-150243	-136285	-112848	-107872	-82334	-69520	-63849.5	-58649.7
	218.5	-9.12698	-8.59824	-8.06912	-7.29437	-6.05466	-5.76886	-4.4051	-3.70646	-3.42549	-3.13653		218.5	-169871	-160030	-150182	-135763	-112689	-107370	-81987.7	-68984.6	-63755.2	-58377.1
	218.6	-9.104	-8.57659	-8.06396	-7.2652	-6.04505	-5.74075	-4.3857	-3.67707	-3.41946	-3.12144		218.6	-169443	-159627	-150086	-135220	-112510	-106847	-81626.6	-68437.6	-63643	-58096.1
	218.7	-9.07912	-8.55328	-8.05685	-7.23493	-6.0343	-5.71153	-4.36551	-3.64708	-3.41244	-3.10584		218.7	-168981	-159194	-149954	-134656	-112310	-106303	-81250.9	-67879.3	-63512.2	-57805.8
	218.8	-9.05232	-8.52822	-8.04773	-7.20352	-6.02241	-5.68121	-4.34452	-3.61648	-3.40439	-3.08972		218.8	-168482	-158727	-149784	-134072	-112089	-105739	-80860.1	-67309.9	-63362.5	-57505.8
	218.9	-9.02356	-8.50133	-8.03655	-7.17091	-6.00936	-5.64979	-4.32272	-3.5853	-3.39532	-3.07305		218.9	-167946	-158227	-149576	-133465	-111846	-105154	-80454.4	-66729.6	-63193.7	-57195.5
	219	-8.99279	-8.47252	-8.02324	-7.13704	-5.99514	-5.61724	-4.3001	-3.55353	-3.38524	-3.05579		219	-167374	-157690	-149328	-132835	-111581	-104548	-80033.3	-66138.2	-63006	-56874.4
	219.1	-8.95994	-8.44167	-8.00776	-7.10189	-5.9797	-5.58354	-4.27667	-3.52114	-3.3741	-3.03791		219.1	-166762	-157116	-149040	-132180	-111294	-103921	-79597.2	-65535.4	-62798.6	-56541.5
	219.2	-8.92493	-8.40869	-7.99004	-7.06542	-5.96301	-5.54866	-4.25242	-3.48812	-3.36186	-3.01934		219.2	-166111	-156502	-148711	-131502	-110984	-103272	-79146	-64920.9	-62570.8	-56195.8
	219.3	-8.88767	-8.3735	-7.97001	-7.02758	-5.94503	-5.51258	-4.22735	-3.45451	-3.34848	-3.00002		219.3	-165417	-155848	-148338	-130797	-110649	-102600	-78679.3	-64295.2	-62321.8	-55836.2
	219.4	-8.84808	-8.33605	-7.9476	-6.98834	-5.92571	-5.4753	-4.20141	-3.42032	-3.33396	-2.97991		219.4	-164680	-155150	-147921	-130067	-110289	-101906	-78196.6	-63659	-62051.6	-55462.1
	219.5	-8.80609	-8.29627	-7.92273	-6.94763	-5.90502	-5.43681	-4.1746	-3.38559	-3.31832	-2.95902		219.5	-163899	-154410	-147458	-129309	-109904	-101190	-77697.7	-63012.6	-61760.5	-55073.3
	219.6	-8.76162	-8.25412	-7.89534	-6.9054	-5.88291	-5.39708	-4.14692	-3.35034	-3.30158	-2.93734		219.6	-163071	-153626	-146948	-128523	-109493	-100450	-77182.5	-62356.5	-61448.9	-54669.8
	219.7	-8.71459	-8.20954	-7.86541	-6.8616	-5.85936	-5.35609	-4.11836	-3.31455	-3.28374	-2.91485		219.7	-162196	-152796	-146391	-127708	-109054	-99687.4	-76650.8	-61690.4	-61116.9	-54251.2
	219.8	-8.66493	-8.16246	-7.83292	-6.81616	-5.83431	-5.31381	-4.08889	-3.27824	-3.26486	-2.89153		219.8	-161272	-151920	-145786	-126862	-108588	-98900.5	-76102.3	-61014.6	-60765.6	-53817.2
	219.9	-8.61259	-8.11285	-7.79784	-6.76904	-5.80772	-5.27019	-4.0585	-3.24143	-3.24499	-2.86737		219.9	-160297	-150996	-145133	-125985	-108093	-98088.7	-75536.8	-60329.5	-60395.7	-53367.5
	220	-8.5575	-8.06068	-7.76011	-6.72017	-5.77952	-5.2252	-4.02719	-3.20417	-3.22415	-2.84235		220	-159272	-150025	-144431	-125076	-107568	-97251.4	-74954	-59635.9	-60007.8	-52901.9
	220.1	-8.49958	-8.00594	-7.71966	-6.66949	-5.74963	-5.17883	-3.99493	-3.16648	-3.20234	-2.81649		220.1	-158194	-149006	-143678	-124133	-107012	-96388.3	-74353.6	-58934.6	-59601.9	-52420.4
	220.2	-8.43881	-7.9486	-7.6764	-6.61698	-5.71796	-5.13106	-3.96171	-3.12842	-3.17956	-2.7898		220.2	-157063	-147939	-142873	-123155	-106423	-95499.2	-73735.2	-58226.2	-59177.8	-51923.6
	220.3	-8.37516	-7.88861	-7.63027	-6.56258	-5.68445	-5.0819	-3.9275	-3.09003	-3.1558	-2.76232		220.3	-155878	-146823	-142014	-122143	-105799	-94584.3	-73098.6	-57511.5	-58735.8	-51412.3
	220.4	-8.30857	-7.82591	-7.58121	-6.50628	-5.64904	-5.03138	-3.89229	-3.0513	-3.13109	-2.73408		220.4	-154639	-145656	-141101	-121095	-105140	-93643.9	-72443.3	-56790.7	-58275.7	-50886.7
	220.5	-8.239	-7.76045	-7.52917	-6.44808	-5.61167	-4.9795	-3.85607	-3.01223	-3.1054	-2.70508		220.5	-153344	-144437	-140133	-120012	-104444	-92678.3	-71769.2	-56063.6	-57797.7	-50347
	220.6	-8.16644	-7.69223	-7.47411	-6.38799	-5.57228	-4.92626	-3.81883	-2.97281	-3.07874	-2.67538		220.6	-151994	-143168	-139108	-118893	-103711	-91687.5	-71076.1	-55329.9	-57301.4	-49794.1
	220.7	-8.09083	-7.62118	-7.41595	-6.326	-5.53086	-4.87166	-3.78057	-2.93304	-3.05111	-2.64501		220.7	-150586	-141845	-138026	-117739	-102940	-90671.3	-70363.9	-54589.6	-56787.3	-49228.9
	220.8	-8.01213	-7.54727	-7.35464	-6.2621	-5.48734	-4.81566	-3.74127	-2.89289	-3.02252	-2.61398		220.8	-149122	-140470	-136885	-116550	-102130	-89629	-69632.5	-53842.4	-56255	-48651.4
	220.9	-7.93026	-7.47045	-7.29013	-6.19626	-5.44169	-4.75825	-3.70094	-2.85234	-2.99295	-2.58232		220.9	-147598	-139040	-135684	-115325	-101281	-88560.4	-68881.9	-53087.8	-55704.7	-48062.1
	221	-7.84516	-7.39071	-7.22232	-6.12847	-5.39385	-4.69939	-3.65958	-2.8114	-2.96243	-2.55004		221	-146014	-137556	-134422	-114063	-100390	-87465	-68112	-52325.7	-55136.7	-47461.2
	221.1	-7.75681	-7.30802	-7.15119	-6.05868	-5.34379	-4.63907	-3.61716	-2.77005	-2.93101	-2.51714		221.1	-144370	-136017	-133098	-112764	-99458.6	-86342.4	-67322.5	-51556.1	-54551.9	-46849
	221.2	-7.6652	-7.22234	-7.07666	-5.98685	-5.29149	-4.57729	-3.57368	-2.72829	-2.89872	-2.48365		221.2	-142665	-134422	-131711	-111427	-98485.1	-85192.4	-66513.2	-50778.8	-53951	-46225.7
	221.3	-7.57031	-7.13367	-6.99871	-5.91299	-5.23692	-4.51404	-3.5291	-2.68609	-2.8656	-2.44957		221.3	-140898	-132772	-130260	-110052	-97469.4	-84015.2	-65683.6	-49993.6	-53334.5	-45591.4
	221.4	-7.47214	-7.04201	-6.91729	-5.83704	-5.18005	-4.44931	-3.48338	-2.64346	-2.83171	-2.41493		221.4	-139071	-131066	-128745	-108639	-96411	-82810.5	-64832.6	-49200.1	-52703.7	-44946.6
	221.5	-7.37071	-6.94735	-6.83238	-5.75897	-5.12086	-4.3831	-3.43647	-2.60039	-2.7971	-2.37974		221.5	-137184	-129304	-127164	-107186	-95309.3	-81578.2	-63959.5	-48398.5	-52059.5	-44291.7
	221.6	-7.26598	-6.84967	-6.74393	-5.67877	-5.05933	-4.31543	-3.3883	-2.55688	-2.76182	-2.34405		221.6	-135234	-127486	-125518	-105693	-94164.1	-80318.6	-63063	-47588.5	-51403	-43627.5
	221.7	-7.15793	-6.74894	-6.65191	-5.59646	-4.99547	-4.24628	-3.33883	-2.51289	-2.72594	-2.3079		221.7	-133223	-125611	-123805	-104161	-92975.6	-79031.7	-62142.2	-46769.9	-50735.1	-42954.7
	221.8	-7.04653	-6.64513	-6.55629	-5.51203	-4.92929	-4.17567	-3.28802	-2.46844	-2.68947	-2.27135		221.8	-131150	-123679	-122026	-102590	-91743.8	-77717.5	-61196.7	-45942.5	-50056.4	-42274.4
	221.9	-6.93179	-6.53821	-6.45705	-5.42545	-4.8608	-4.1036	-3.23586	-2.42352	-2.65244	-2.23446		221.9	-129014	-121689	-120179	-100978	-90469.1	-76376.2	-60225.8	-45106.5	-49367.1	-41587.7
	222	-6.8137	-6.42817	-6.35416	-5.33667	-4.79001	-4.03009	-3.18231	-2.37814	-2.61485	-2.1973		222	-126816	-119641	-118263	-99326.1	-89151.6	-75007.9	-59229.1	-44262	-48667.6	-40896.1
	222.1	-6.69226	-6.31498	-6.24758	-5.24564	-4.71691	-3.95513	-3.12738	-2.33232	-2.57674	-2.15994		222.1	-124556	-117534	-116280	-97631.9	-87791.1	-73612.8	-58206.8	-43409.1	-47958.2	-40200.8
	222.2	-6.56746	-6.19864	-6.13734	-5.15233	-4.6415	-3.87872	-3.07108	-2.28604	-2.53811	-2.1224		222.2	-122234	-115369	-114228	-95895.1	-86387.5	-72190.6	-57158.9	-42547.8	-47239.2	-39502.2
	222.3	-6.43927	-6.07912	-6.02343	-5.05673	-4.56375	-3.80087	-3.01342	-2.23931	-2.49898	-2.08474		222.3	-119848	-113144	-112108	-94115.8	-84940.4	-70741.7	-56085.8	-41678	-46510.9	-38801.1
	222.4	-6.30768	-5.95639	-5.90586	-4.9588	-4.48363	-3.72159	-2.95442	-2.19214	-2.45937	-2.04698		222.4	-117398	-110860	-109920	-92293.1	-83449.3	-69266.1	-54987.6	-40800.1	-45773.8	-38098.3
	222.5	-6.17266	-5.83045	-5.78464	-4.85847	-4.40113	-3.64087	-2.89405	-2.14453	-2.41933	-2.00919		222.5	-114885	-108516	-107664	-90425.7	-81913.7	-67763.8	-53864.1	-39914	-45028.6	-37395.1
	222.6	-6.03422	-5.7013	-5.65982	-4.75569	-4.31621	-3.55872	-2.83233	-2.09648	-2.37887	-1.97144		222.6	-112309	-106113	-105340	-88512.8	-80333.3	-66234.8	-52715.3	-39019.7	-44275.5	-36692.5
	222.7	-5.89236	-5.56894	-5.53142	-4.65042	-4.22887	-3.47514	-2.76925	-2.04797	-2.33802	-1.93381		222.7	-109668	-103649	-102951	-86553.6	-78707.6	-64679.3	-51541.3	-38116.8	-43515.2	-35992.1
	222.8	-5.74706	-5.43337	-5.39948	-4.54264	-4.13906	-3.39015	-2.70481	-1.99899	-2.2968	-1.89636		222.8	-106964	-101126	-100495	-84547.5	-77036.2	-63097.4	-50341.9	-37205.2	-42748	-35295.1
	222.9	-5.59833	-5.2946	-5.26402	-4.4323	-4.0468	-3.30376	-2.639	-1.94957	-2.25524	-1.85914		222.9	-104196	-98542.9	-97973.9	-82493.9	-75318.9	-61489.6	-49117.1	-36285.4	-41974.4	-34602.3
	223	-5.4462	-5.15262	-5.12505	-4.31939	-3.95206	-3.21602	-2.57182	-1.89971	-2.21334	-1.82218		223	-101365	-95900.5	-95387.4	-80392.4	-73555.7	-59856.5	-47866.7	-35357.4	-41194.7	-33914.5
	223.1	-5.29066	-5.00747	-4.98259	-4.20387	-3.85485	-3.12696	-2.50328	-1.84941	-2.17112	-1.78554		223.1	-98469.8	-93199	-92735.9	-78242.4	-71746.3	-58198.9	-46591.1	-34421.1	-40408.8	-33232.5
	223.2	-5.13172	-4.85916	-4.83664	-4.08573	-3.75515	-3.03661	-2.43339	-1.79864	-2.12856	-1.74928		223.2	-95511.5	-90438.6	-90019.6	-76043.6	-69890.7	-56517.4	-45290.2	-33476.3	-39616.7	-32557.6
	223.3	-4.96936	-4.70768	-4.68725	-3.96495	-3.65297	-2.94502	-2.36213	-1.74739	-2.08568	-1.71344		223.3	-92489.7	-87619.3	-87239.1	-73795.5	-67989	-54812.6	-43963.9	-32522.5	-38818.6	-31890.5
	223.4	-4.80361	-4.55305	-4.53447	-3.84152	-3.54834	-2.85219	-2.28952	-1.69564	-2.04248	-1.67801		223.4	-89404.7	-84741.2	-84395.6	-71498.2	-66041.7	-53084.8	-42612.5	-31559.2	-38014.6	-31231.1
	223.5	-4.63445	-4.39528	-4.37837	-3.71546	-3.44127	-2.75814	-2.21557	-1.64337	-1.99897	-1.64297		223.5	-86256.3	-81804.8	-81490.2	-69152.1	-64048.9	-51334.4	-41236.2	-30586.4	-37204.8	-30578.9
	223.6	-4.46187	-4.23441	-4.21902	-3.58678	-3.33178	-2.66288	-2.14031	-1.59058	-1.95518	-1.60829		223.6	-83044.2	-78810.8	-78524.4	-66757.1	-62011	-49561.5	-39835.3	-29603.9	-36389.8	-29933.4
	223.7	-4.28587	-4.07049	-4.05649	-3.4555	-3.21988	-2.56643	-2.06375	-1.53726	-1.91112	-1.57396		223.7	-79768.5	-75760	-75499.4	-64313.7	-59928.4	-47766.4	-38410.4	-28611.5	-35569.8	-29294.5
	223.8	-4.10646	-3.90356	-3.89085	-3.32162	-3.10562	-2.46881	-1.98591	-1.4834	-1.8668	-1.53998		223.8	-76429.4	-72652.9	-72416.4	-61822	-57801.8	-45949.5	-36961.7	-27608.9	-34744.9	-28662.1
	223.9	-3.92366	-3.73362	-3.72217	-3.18516	-2.98903	-2.37006	-1.9068	-1.42897	-1.82221	-1.50634		223.9	-73027.2	-69490.1	-69276.9	-59282.2	-55631.8	-44111.5	-35489.3	-26595.9	-33915	-28036
	224	-3.7375	-3.56073	-3.55054	-3.04612	-2.87013	-2.27017	-1.82642	-1.37398	-1.77737	-1.47302		224	-69562.4	-66272.2	-66082.6	-56694.3	-53418.8	-42252.3	-33993.3	-25572.4	-33080.3	-27415.8
	224.1	-3.54801	-3.3849	-3.37605	-2.90449	-2.74896	-2.16916	-1.74477	-1.31843	-1.73228	-1.43999		224.1	-66035.6	-62999.8	-62835	-54058.4	-51163.5	-40372.4	-32473.7	-24538.6	-32241.2	-26801.2
	224.2	-3.35524	-3.20618	-3.19878	-2.7603	-2.62554	-2.06708	-1.66187	-1.26235	-1.68697	-1.40725		224.2	-62447.7	-59673.3	-59535.6	-51374.7	-48866.6	-38472.4	-30930.7	-23494.9	-31397.8	-26191.7
	224.3	-3.15925	-3.0246	-3.01885	-2.61358	-2.49993	-1.96395	-1.5777	-1.20574	-1.64141	-1.37476		224.3	-58799.9	-56293.8	-56186.8	-48643.9	-46528.7	-36553	-29364.2	-22441.3	-30549.9	-25587.1
	224.4	-2.96009	-2.84024	-2.83639	-2.46436	-2.37215	-1.85983	-1.4923	-1.14864	-1.5956	-1.34255		224.4	-55093.1	-52862.6	-52790.8	-45866.7	-44150.5	-34615.1	-27774.6	-21378.4	-29697.4	-24987.5
	224.5	-2.7578	-2.65316	-2.65147	-2.31268	-2.24226	-1.75477	-1.40568	-1.09108	-1.54955	-1.31061		224.5	-51328.2	-49380.5	-49349.1	-43043.5	-41732.8	-32659.8	-26162.5	-20307.2	-28840.1	-24393
	224.6	-2.55243	-2.46337	-2.4642	-2.15854	-2.11029	-1.64881	-1.31789	-1.03311	-1.50326	-1.27894		224.6	-47505.9	-45848.3	-45863.6	-40174.7	-39276.7	-30687.6	-24528.5	-19228.3	-27978.6	-23803.6
	224.7	-2.34405	-2.27095	-2.27466	-2.00197	-1.97631	-1.54196	-1.22896	-0.974785	-1.45674	-1.24754		224.7	-43627.4	-42266.9	-42335.9	-37260.7	-36783.1	-28699	-22873.3	-18142.7	-27112.8	-23219.2
	224.8	-2.13274	-2.07595	-2.08294	-1.84304	-1.84036	-1.43427	-1.13894	-0.916117	-1.40998	-1.21639		224.8	-39694.5	-38637.5	-38767.7	-34302.7	-34252.7	-26694.6	-21198	-17050.8	-26242.4	-22639.4
	224.9	-1.91859	-1.87844	-1.88915	-1.68181	-1.70248	-1.32577	-1.04791	-0.857147	-1.36296	-1.18545		224.9	-35708.7	-34961.4	-35160.8	-31301.8	-31686.5	-24675.2	-19503.7	-15953.2	-25367.3	-22063.6
	225	-1.70167	-1.6785	-1.69337	-1.51831	-1.56274	-1.21649	-0.955938	-0.797923	-1.31566	-1.15471		225	-31671.5	-31240.2	-31517	-28258.8	-29085.6	-22641.3	-17791.9	-14850.9	-24487.1	-21491.4
	225.1	-1.48208	-1.47621	-1.49572	-1.35261	-1.42118	-1.10646	-0.86308	-0.738487	-1.26809	-1.12414		225.1	-27584.4	-27475.2	-27838.3	-25174.7	-26451.1	-20593.5	-16063.6	-13744.7	-23601.8	-20922.4
	225.2	-1.25987	-1.27168	-1.29629	-1.18479	-1.27789	-0.995717	-0.769385	-0.678855	-1.2203	-1.09374		225.2	-23448.7	-23668.5	-24126.6	-22051.2	-23784.1	-18532.3	-14319.8	-12634.8	-22712.2	-20356.8
	225.3	-1.03512	-1.06499	-1.0952	-1.01493	-1.13295	-0.884296	-0.67491	-0.619017	-1.17232	-1.06352		225.3	-19265.6	-19821.6	-20383.9	-18889.8	-21086.4	-16458.5	-12561.4	-11521.1	-21819.2	-19794.2
	225.4	-0.807897	-0.856256	-0.892541	-0.843127	-0.986435	-0.772245	-0.579709	-0.558973	-1.1242	-1.03343		225.4	-15036.6	-15936.6	-16612	-15692.3	-18359.5	-14373	-10789.5	-10403.6	-20923.5	-19234.2
	225.5	-0.578319	-0.645574	-0.688427	-0.669471	-0.838447	-0.659622	-0.483831	-0.498746	-1.07593	-1.00347		225.5	-10763.7	-12015.4	-12813	-12460.2	-15605.2	-12276.9	-9005.06	-9282.66	-20025.2	-18676.5
	225.6	-0.346496	-0.433065	-0.482965	-0.494034	-0.689069	-0.546469	-0.387315	-0.438378	-1.02752	-0.973595		225.6	-6448.98	-8060.2	-8988.93	-9194.95	-12824.9	-10170.9	-7208.71	-8159.08	-19124.2	-18120.5
	225.7	-0.112547	-0.218878	-0.276263	-0.316887	-0.538391	-0.432821	-0.290203	-0.377905	-0.97896	-0.94378		225.7	-2094.72	-4073.76	-5141.8	-5897.9	-10020.5	-8055.65	-5401.25	-7033.57	-18220.4	-17565.6
	225.8	0.123402	-0.00315503	-0.0684179	-0.13812	-0.386503	-0.318715	-0.192559	-0.317383	-0.93024	-0.913985		225.8	2296.75	-58.7214	-1273.39	-2570.69	-7193.59	-5931.92	-3583.91	-5907.12	-17313.6	-17011.1
	225.9	0.361234	0.213971	0.140475	0.0421782	-0.233498	-0.204197	-0.0944612	-0.256869	-0.881363	-0.884169		225.9	6723.28	3982.42	2614.52	785.019	-4345.86	-3800.51	-1758.11	-4780.84	-16403.9	-16456.1
	226	0.600829	0.432377	0.350327	0.223906	-0.0794813	-0.0893125	0.00402088	-0.196423	-0.832327	-0.854291		226	11182.6	8047.4	6520.29	4167.33	-1479.31	-1662.28	74.8365	-3655.82	-15491.3	-15900.1
	226.1	0.842051	0.651937	0.56102	0.406953	0.0754293	0.0258864	0.102824	-0.136098	-0.783116	-0.824292		226.1	15672.2	12133.9	10441.7	7574.2	1403.89	481.797	1913.77	-2533.06	-14575.3	-15341.7
	226.2	1.08474	0.872526	0.772423	0.591204	0.231131	0.141334	0.201883	-0.0759179	-0.73372	-0.79414		226.2	20189.2	16239.4	14376.3	11003.5	4301.82	2630.51	3757.44	-1412.98	-13656	-14780.5
	226.3	1.32875	1.09402	0.984415	0.77652	0.387524	0.256985	0.301131	-0.0159094	-0.684128	-0.763812		226.3	24730.7	20361.9	18321.9	14452.6	7212.59	4783.01	5604.65	-296.105	-12733	-14216.1
	226.4	1.57392	1.3163	1.19688	0.962781	0.544499	0.372809	0.400513	0.0438869	-0.634332	-0.733287		226.4	29293.8	24498.9	22276.4	17919.3	10134.2	6938.72	7454.34	816.822	-11806.2	-13647.9
	226.5	1.82012	1.53921	1.40971	1.14984	0.701959	0.48879	0.499958	0.103445	-0.584342	-0.702547		226.5	33876	28647.8	26237.4	21400.7	13064.9	9097.35	9305.2	1925.32	-10875.8	-13075.8
	226.6	2.06719	1.76263	1.62276	1.33754	0.859794	0.604908	0.599379	0.162738	-0.534154	-0.671583		226.6	38474.6	32806	30202.8	24894.2	16002.5	11258.5	11155.6	3028.88	-9941.67	-12499.5
	226.7	2.31502	1.9864	1.83593	1.52576	1.01789	0.721125	0.698689	0.221755	-0.483785	-0.64041		226.7	43087.1	36970.8	34170.3	28397.3	18945	13421.6	13004	4127.3	-9004.2	-11919.3
	226.8	2.56345	2.21038	2.04911	1.71437	1.17616	0.837394	0.797797	0.280473	-0.43327	-0.609039		226.8	47710.9	41139.5	38138	31907.8	21890.7	15585.6	14848.6	5220.16	-8064.02	-11335.4
	226.9	2.81232	2.43445	2.26218	1.90326	1.33448	0.953673	0.896622	0.338857	-0.382633	-0.577468		226.9	52342.9	45310	42103.6	35423.5	24837.3	17749.7	16687.9	6306.81	-7121.56	-10747.8
	227	3.06146	2.6585	2.47503	2.09232	1.49275	1.06991	0.995102	0.396877	-0.331906	-0.545698		227	56979.8	49480.1	46065.2	38942.2	27783.1	19913.2	18520.8	7386.67	-6177.43	-10156.5
	227.1	3.31066	2.88239	2.68754	2.28143	1.65088	1.18607	1.09317	0.454509	-0.281131	-0.513725		227.1	61618	53647.1	50020.5	42461.9	30726.1	22075.1	20346	8459.31	-5232.41	-9561.45
	227.2	3.55976	3.10596	2.89961	2.47049	1.80875	1.3021	1.19076	0.511715	-0.230346	-0.48156		227.2	66254.2	57808.1	53967.5	45980.8	33664.5	24234.6	22162.3	9524.04	-4287.19	-8962.79
	227.3	3.80858	3.32904	3.11113	2.65939	1.96627	1.41792	1.28781	0.568459	-0.179581	-0.449208		227.3	70885.2	61960.1	57904.2	49496.6	36596.3	26390.3	23968.7	10580.2	-3342.36	-8360.66
	227.4	4.05693	3.55148	3.32196	2.848	2.12335	1.53347	1.38426	0.624707	-0.12888	-0.416677		227.4	75507.5	66100.2	61828.3	53007	39519.8	28540.9	25763.8	11627	-2398.72	-7755.19
	227.5	4.30463	3.77313	3.53198	3.03619	2.27989	1.64866	1.48001	0.680419	-0.0782895	-0.383995		227.5	80117.8	70225.5	65737.1	56509.5	42433.3	30684.9	27545.9	12664	-1457.12	-7146.9
	227.6	4.55151	3.99385	3.74106	3.22382	2.43579	1.76344	1.57496	0.73555	-0.0278651	-0.351189		227.6	84712.6	74333.5	69628.5	60001.6	45334.9	32821.1	29313.2	13690	-518.624	-6536.32
	227.7	4.79738	4.21351	3.94906	3.41077	2.59098	1.87775	1.66905	0.790054	0.0223242	-0.31829		227.7	89288.8	78421.8	73499.9	63481.2	48223.2	34948.6	31064.3	14704.5	415.498	-5924.02
	227.8	5.04209	4.43198	4.15583	3.59691	2.74536	1.99154	1.7622	0.843912	0.0722156	-0.285317		227.8	93843.3	82487.9	77348.2	66945.7	51096.6	37066.5	32798	15706.9	1344.07	-5310.32
	227.9	5.28545	4.64909	4.36121	3.78209	2.89886	2.10475	1.85433	0.897106	0.121748	-0.252283		227.9	98372.7	86528.9	81170.8	70392.1	53953.6	39173.7	34512.9	16696.9	2265.97	-4695.5
	228	5.5273	4.86473	4.56507	3.96615	3.05141	2.21735	1.94539	0.949613	0.170868	-0.219203		228	102874	90542.3	84964.9	73818	56792.8	41269.3	36207.6	17674.2	3180.2	-4079.8
	228.1	5.76749	5.07874	4.76725	4.14898	3.20291	2.32925	2.03532	1.0014	0.219524	-0.186112		228.1	107344	94525.4	88728	77220.7	59612.5	43352.1	37881.4	18638.1	4085.77	-3463.91
	228.2	6.00585	5.29096	4.96762	4.33043	3.35329	2.4404	2.12407	1.05244	0.267663	-0.153045		228.2	111781	98475.3	92457.3	80598	62411.3	45420.7	39533.3	19588.1	4981.74	-2848.48
	228.3	6.2422	5.50128	5.16602	4.51039	3.50246	2.55073	2.2116	1.10273	0.315226	-0.12003		228.3	116180	102390	96150	83947.4	65187.8	47474.2	41162.3	20523.9	5866.98	-2233.99
	228.4	6.47635	5.70953	5.36232	4.68873	3.65035	2.66017	2.29785	1.15223	0.362157	-0.0870839		228.4	120538	106266	99803.4	87266.6	67940.3	49511	42767.5	21445.2	6740.46	-1620.8
	228.5	6.70813	5.91556	5.55635	4.86533	3.79687	2.76864	2.38275	1.20091	0.408419	-0.0542177		228.5	124852	110100	103415	90553.5	70667.4	51529.9	44347.6	22351.4	7601.49	-1009.1
	228.6	6.93735	6.11922	5.748	5.04007	3.94196	2.87609	2.46625	1.24873	0.453998	-0.0214537		228.6	129118	113891	106982	93805.8	73367.7	53529.7	45901.8	23241.4	8449.81	-399.297
	228.7	7.16382	6.32035	5.93711	5.21281	4.08555	2.98243	2.54831	1.29563	0.49886	0.0111867		228.7	133333	117634	110501	97020.8	76040.1	55508.9	47429	24114.2	9284.78	208.207
	228.8	7.38735	6.51879	6.12359	5.3834	4.22758	3.08759	2.62887	1.34154	0.542961	0.0436689		228.8	137493	121328	113972	100196	78683.6	57466.3	48928.6	24968.8	10105.6	812.766
	228.9	7.60777	6.7144	6.30732	5.5517	4.36797	3.1915	2.7079	1.38646	0.586264	0.0759447		228.9	141596	124968	117392	103328	81296.6	59400.1	50399.4	25804.8	10911.5	1413.48
	229	7.82489	6.90704	6.4882	5.71757	4.50664	3.29406	2.78534	1.43037	0.628734	0.10796		229	145637	128554	120758	106415	83877.4	61309	51840.8	26622	11702	2009.35
	229.1	8.03853	7.09657	6.6661	5.88087	4.64348	3.39519	2.86116	1.47325	0.670345	0.139681		229.1	149613	132081	124069	109455	86424.4	63191.3	53251.8	27420.2	12476.5	2599.73
	229.2	8.24853	7.28287	6.8409	6.04144	4.77839	3.49481	2.9353	1.51514	0.711066	0.171079		229.2	153522	135549	127323	112443	88935.3	65045.4	54631.8	28199.7	13234.4	3184.12
	229.3	8.45473	7.46577	7.01248	6.19914	4.91124	3.59285	3.00775	1.55603	0.750874	0.20213		229.3	157359	138953	130516	115378	91408	66870	55980.1	28960.8	13975.3	3762.04
	229.4	8.65696	7.64515	7.1807	6.35381	5.04193	3.68925	3.07845	1.59594	0.78974	0.232798		229.4	161123	142291	133647	118257	93840.4	68664.2	57296	29703.7	14698.6	4332.84
	229.5	8.85508	7.82086	7.34546	6.50532	5.17035	3.78397	3.14736	1.63488	0.827641	0.263043		229.5	164811	145562	136714	121077	96230.5	70427.2	58578.6	30428.4	15404.1	4895.76
	229.6	9.04895	7.99279	7.50665	6.65353	5.29639	3.87698	3.21446	1.67283	0.864544	0.292824		229.6	168419	148762	139714	123835	98576.3	72158.4	59827.4	31134.7	16090.9	5450.04
	229.7	9.23842	8.16082	7.66414	6.79833	5.41995	3.96823	3.27971	1.70978	0.900415	0.322121		229.7	171945	151889	142645	126530	100876	73856.7	61042	31822.5	16758.5	5995.31
	229.8	9.42335	8.32482	7.81782	6.93961	5.54091	4.05763	3.3431	1.74572	0.935237	0.350905		229.8	175387	154941	145505	129160	103127	75520.6	62221.7	32491.3	17406.6	6531.03
	229.9	9.60355	8.48466	7.96757	7.07728	5.65917	4.14509	3.4046	1.78061	0.968989	0.379163		229.9	178741	157916	148292	131722	105328	77148.4	63366.3	33140.8	18034.8	7056.98
	230	9.77885	8.64023	8.11328	7.21123	5.77466	4.23052	3.46418	1.81442	1.00163	0.406888		230	182004	160812	151004	134215	107478	78738.5	64475.3	33770	18642.3	7572.99
	230.1	9.94907	8.79139	8.25483	7.34138	5.88728	4.31386	3.52183	1.84711	1.03313	0.434049		230.1	185172	163625	153639	136638	109574	80289.5	65548.2	34378.4	19228.5	8078.51
	230.2	10.1141	8.93802	8.39213	7.46762	5.99695	4.39501	3.57749	1.87866	1.06344	0.460613		230.2	188243	166354	156194	138987	111615	81799.9	66584.3	34965.7	19792.8	8572.91
	230.3	10.2737	9.08002	8.52506	7.58985	6.10357	4.47392	3.63113	1.90905	1.09254	0.486552		230.3	191214	168997	158668	141262	113600	83268.5	67582.5	35531.2	20334.4	9055.71
	230.4	10.4278	9.21726	8.65354	7.708	6.20706	4.55052	3.68269	1.93823	1.12041	0.511841		230.4	194082	171552	161060	143461	115526	84694.1	68542.2	36074.2	20853	9526.39
	230.5	10.5763	9.34968	8.77749	7.82197	6.30733	4.62475	3.73214	1.96617	1.14703	0.536466		230.5	196846	174016	163366	145582	117392	86075.7	69462.5	36594.4	21348.6	9984.69
	230.6	10.7191	9.4772	8.89682	7.93168	6.40431	4.69656	3.77942	1.99288	1.17242	0.560412		230.6	199503	176389	165588	147624	119197	87412.3	70342.6	37091.4	21821.1	10430.4
	230.7	10.8559	9.59976	9.01147	8.03706	6.49793	4.7659	3.82452	2.0183	1.19659	0.583654		230.7	202050	178671	167721	149586	120939	88702.8	71181.9	37564.7	22270.9	10863
	230.8	10.9868	9.71728	9.12135	8.13807	6.5881	4.83272	3.86741	2.04244	1.21954	0.606176		230.8	204487	180858	169766	151466	122618	89946.5	71980.1	38013.8	22698.1	11282.1
	230.9	11.1117	9.82965	9.22639	8.23464	6.67477	4.89697	3.90809	2.06527	1.24129	0.627971		230.9	206811	182949	171721	153263	124231	91142.4	72737.4	38438.8	23103	11687.8
	231	11.2305	9.93678	9.32654	8.32674	6.75788	4.95862	3.94658	2.0868	1.26185	0.649039		231	209021	184943	173585	154977	125777	92289.8	73453.7	38839.6	23485.6	12079.9
	231.1	11.3431	10.0386	9.42175	8.41429	6.83736	5.01762	3.98287	2.10705	1.28123	0.669379		231.1	211117	186839	175358	156607	127257	93387.8	74129	39216.4	23846.2	12458.5
	231.2	11.4494	10.1351	9.51199	8.49723	6.91318	5.07393	4.01696	2.12602	1.29944	0.688976		231.2	213096	188634	177037	158150	128668	94435.9	74763.6	39569.4	24185.1	12823.2
	231.3	11.5494	10.2261	9.59721	8.57553	6.98526	5.12752	4.04887	2.14371	1.31649	0.707804		231.3	214957	190328	178623	159608	130010	95433.3	75357.6	39898.8	24502.4	13173.6
	231.4	11.643	10.3116	9.6774	8.64913	7.05355	5.17836	4.07861	2.16015	1.33239	0.725864		231.4	216699	191920	180116	160977	131281	96379.5	75911	40204.7	24798.3	13509.8
	231.5	11.7301	10.3916	9.75253	8.71798	7.118	5.22642	4.10616	2.17534	1.34714	0.743159		231.5	218321	193408	181514	162259	132480	97274.1	76423.8	40487.4	25073	13831.7
	231.6	11.8108	10.4659	9.82261	8.78207	7.17857	5.2717	4.13154	2.18927	1.36078	0.759679		231.6	219822	194791	182818	163452	133607	98116.8	76896.1	40746.7	25326.9	14139.1
	231.7	11.8849	10.5346	9.88762	8.84134	7.23523	5.31415	4.15476	2.20197	1.37332	0.775409		231.7	221201	196069	184028	164555	134662	98907	77328.3	40983	25560.3	14431.9
	231.8	11.9524	10.5975	9.94755	8.89576	7.28795	5.35377	4.17584	2.21344	1.38478	0.790344		231.8	222458	197241	185144	165568	135643	99644.3	77720.6	41196.4	25773.6	14709.9
	231.9	12.0133	10.6548	10.0024	8.94534	7.3367	5.39053	4.19478	2.2237	1.39517	0.804496		231.9	223592	198306	186165	166491	136551	100329	78073.3	41387.5	25966.9	14973.3
	232	12.0676	10.7062	10.0522	8.99007	7.38143	5.42444	4.21161	2.2328	1.40451	0.817876		232	224603	199264	187091	167323	137383	100960	78386.5	41556.8	26140.7	15222.3
	232.1	12.1154	10.752	10.0968	9.02994	7.42211	5.45551	4.22633	2.24076	1.41281	0.830498		232.1	225491	200115	187922	168065	138140	101538	78660.4	41704.9	26295.2	15457.2
	232.2	12.1565	10.7919	10.1364	9.06496	7.45869	5.48374	4.23892	2.24761	1.4201	0.842386		232.2	226258	200859	188658	168717	138821	102063	78894.7	41832.4	26430.8	15678.5
	232.3	12.1912	10.8261	10.1708	9.09514	7.49113	5.50914	4.24938	2.25336	1.42638	0.853587		232.3	226902	201495	189299	169279	139425	102536	79089.4	41939.5	26547.7	15887
	232.4	12.2193	10.8545	10.2001	9.12047	7.51943	5.53171	4.2577	2.25803	1.43165	0.864139		232.4	227426	202023	189844	169750	139952	102956	79244.2	42026.4	26645.9	16083.4
	232.5	12.241	10.877	10.2243	9.14099	7.54359	5.55145	4.26388	2.26161	1.43592	0.874064		232.5	227830	202443	190295	170132	140401	103324	79359.3	42093.1	26725.2	16268.1
	232.6	12.2563	10.8939	10.2434	9.15673	7.56361	5.56837	4.26794	2.26411	1.43916	0.883369		232.6	228113	202756	190651	170425	140774	103638	79434.8	42139.6	26785.7	16441.3
	232.7	12.2651	10.9049	10.2575	9.16774	7.57951	5.58246	4.2699	2.26552	1.44139	0.892062		232.7	228278	202963	190912	170630	141070	103901	79471.3	42165.8	26827.2	16603
	232.8	12.2675	10.9103	10.2665	9.17404	7.5913	5.59374	4.26977	2.26585	1.44261	0.900152		232.8	228323	203062	191080	170747	141289	104111	79469	42172	26849.8	16753.6
	232.9	12.2637	10.9099	10.2705	9.17569	7.59902	5.60221	4.2676	2.26512	1.44281	0.90766		232.9	228251	203056	191155	170778	141433	104268	79428.6	42158.4	26853.6	16893.3
	233	12.2536	10.9039	10.2696	9.17273	7.6027	5.60791	4.26341	2.26333	1.44199	0.91459		233	228063	202944	191137	170723	141501	104374	79350.5	42125	26838.2	17022.3
	233.1	12.2372	10.8923	10.2637	9.1652	7.60238	5.61085	4.25721	2.26047	1.44011	0.920943		233.1	227759	202728	191028	170583	141495	104429	79235.1	42071.9	26803.4	17140.6
	233.2	12.2148	10.8752	10.253	9.15313	7.59812	5.61104	4.24901	2.25655	1.43719	0.926726		233.2	227341	202409	190828	170358	141416	104433	79082.5	41999	26749	17248.2
	233.3	12.1862	10.8526	10.2374	9.1366	7.58994	5.60853	4.23883	2.25157	1.43323	0.931933		233.3	226810	201988	190539	170050	141264	104386	78893.1	41906.3	26675.2	17345.1
	233.4	12.1518	10.8246	10.2171	9.11566	7.57789	5.60332	4.22672	2.24554	1.42824	0.936566		233.4	226168	201467	190161	169660	141040	104289	78667.6	41793.9	26582.5	17431.4
	233.5	12.1114	10.7913	10.1921	9.09038	7.56199	5.59548	4.21269	2.23845	1.42225	0.940628		233.5	225418	200848	189695	169190	140744	104143	78406.5	41662	26470.9	17507
	233.6	12.0654	10.7528	10.1625	9.06083	7.5423	5.58504	4.1968	2.23033	1.41527	0.944122		233.6	224560	200131	189144	168640	140377	103949	78110.8	41510.9	26340.9	17572
	233.7	12.0136	10.7092	10.1283	9.02706	7.51885	5.57207	4.17909	2.22121	1.4073	0.94705		233.7	223597	199319	188508	168012	139941	103707	77781.2	41341.2	26192.7	17626.5
	233.8	11.9563	10.6605	10.0897	8.98916	7.49169	5.5566	4.15961	2.21113	1.39837	0.949418		233.8	222530	198413	187789	167306	139435	103419	77418.5	41153.4	26026.4	17670.6
	233.9	11.8935	10.6068	10.0466	8.9472	7.46087	5.53869	4.13838	2.20009	1.38846	0.951236		233.9	221362	197414	186988	166525	138862	103086	77023.5	40948	25842	17704.4
	234	11.8254	10.5483	9.99928	8.90126	7.42643	5.51837	4.11547	2.18815	1.3776	0.952523		234	220095	196325	186107	165670	138221	102708	76597	40725.8	25639.9	17728.3
	234.1	11.7521	10.485	9.94769	8.85143	7.38844	5.4957	4.09091	2.17534	1.3658	0.953299		234.1	218730	195146	185146	164743	137513	102286	76139.9	40487.4	25420.2	17742.8
	234.2	11.6737	10.417	9.89196	8.79778	7.34693	5.47074	4.06476	2.16169	1.35309	0.953586		234.2	217270	193880	184109	163744	136741	101821	75653.3	40233.3	25183.6	17748.1
	234.3	11.5902	10.3444	9.83219	8.7404	7.30197	5.44354	4.03708	2.1472	1.33953	0.95341		234.3	215717	192530	182997	162676	135904	101315	75138	39963.7	24931.2	17744.8
	234.4	11.5019	10.2675	9.76847	8.67941	7.25362	5.41414	4.00788	2.13189	1.32516	0.952791		234.4	214072	191098	181811	161541	135004	100768	74594.7	39678.6	24664	17733.3
	234.5	11.4087	10.1862	9.70093	8.61489	7.20195	5.3826	3.9772	2.11575	1.31006	0.951745		234.5	212338	189586	180554	160340	134043	100181	74023.7	39378.4	24382.9	17713.9
	234.6	11.3109	10.1008	9.62966	8.54697	7.14704	5.34896	3.94508	2.09883	1.29427	0.95029		234.6	210517	187995	179227	159076	133021	99554.7	73425.8	39063.3	24088.9	17686.8
	234.7	11.2085	10.0113	9.55476	8.47573	7.08898	5.31325	3.91155	2.08114	1.27781	0.948435		234.7	208612	186330	177833	157750	131940	98890.1	72801.7	38734.2	23782.7	17652.3
	234.8	11.1017	9.91787	9.47631	8.40126	7.02782	5.27552	3.87664	2.06274	1.26073	0.946186		234.8	206624	184591	176373	156364	130802	98187.9	72152	38391.7	23464.8	17610.4
	234.9	10.9906	9.8207	9.39439	8.32367	6.96364	5.23583	3.84041	2.04365	1.24305	0.943557		234.9	204557	182783	174848	154920	129607	97449.1	71477.6	38036.4	23135.5	17561.5
	235	10.8754	9.71989	9.30911	8.24305	6.89652	5.19423	3.80288	2.0239	1.22476	0.940566		235	202413	180906	173261	153420	128358	96674.9	70779.1	37668.8	22795.2	17505.8
	235.1	10.7563	9.61556	9.22059	8.15951	6.82653	5.1508	3.76409	2.0035	1.20589	0.93722		235.1	200195	178965	171613	151865	127055	95866.6	70057.2	37289.1	22444	17443.5
	235.2	10.6333	9.50789	9.12895	8.07314	6.75377	5.10561	3.72408	1.98246	1.18646	0.93351		235.2	197907	176961	169908	150257	125701	95025.5	69312.6	36897.4	22082.4	17374.5
	235.3	10.5067	9.39702	9.0343	7.98407	6.67835	5.05871	3.68291	1.96078	1.16649	0.92943		235.3	195550	174897	168146	148599	124297	94152.7	68546.2	36494.1	21710.8	17298.5
	235.4	10.3766	9.2831	8.93677	7.89243	6.60035	5.01017	3.64062	1.9385	1.146	0.924973		235.4	193129	172777	166331	146894	122846	93249.2	67759.1	36079.3	21329.3	17215.6
	235.5	10.2431	9.16627	8.83645	7.79832	6.5199	4.96002	3.59728	1.91561	1.12497	0.920138		235.5	190645	170603	164464	145142	121348	92315.8	66952.4	35653.3	20937.9	17125.6
	235.6	10.1065	9.0467	8.73345	7.7019	6.43708	4.9083	3.55296	1.89214	1.10342	0.914917		235.6	188102	168377	162547	143348	119807	91353.3	66127.6	35216.5	20536.8	17028.4
	235.7	9.96686	8.92456	8.62789	7.60328	6.352	4.85507	3.50775	1.8681	1.08137	0.909297		235.7	185503	166104	160582	141512	118223	90362.5	65286.1	34769.1	20126.5	16923.8
	235.8	9.82433	8.8	8.51991	7.50258	6.26477	4.80038	3.4617	1.84352	1.05886	0.903265		235.8	182850	163786	158572	139638	116600	89344.6	64429.1	34311.6	19707.5	16811.6
	235.9	9.67909	8.67319	8.40962	7.39993	6.17549	4.74429	3.41488	1.81842	1.03592	0.896803		235.9	180147	161425	156520	137727	114938	88300.7	63557.8	33844.3	19280.5	16691.3
	236	9.53131	8.54428	8.29718	7.29545	6.08428	4.68686	3.36735	1.79279	1.01258	0.889889		236	177397	159026	154427	135783	113241	87231.9	62673.2	33367.4	18846.1	16562.6
	236.1	9.38114	8.41344	8.1827	7.1893	5.99125	4.62815	3.31916	1.76665	0.988893	0.882506		236.1	174602	156591	152296	133807	111509	86139.1	61776.1	32880.9	18405.3	16425.2
	236.2	9.22878	8.28084	8.06631	7.0816	5.89651	4.5682	3.27034	1.74	0.964901	0.874635		236.2	171766	154123	150130	131803	109746	85023.3	60867.5	32384.9	17958.7	16278.7
	236.3	9.07438	8.14663	7.94813	6.97248	5.8002	4.50708	3.22095	1.71285	0.940649	0.866266		236.3	168892	151625	147930	129772	107953	83885.7	59948.2	31879.6	17507.4	16122.9
	236.4	8.91812	8.01098	7.82826	6.8621	5.70244	4.44485	3.17102	1.68523	0.916189	0.857404		236.4	165984	149100	145700	127717	106134	82727.5	59019	31365.6	17052.1	15958
	236.5	8.76018	7.87403	7.70684	6.75057	5.60336	4.38158	3.12063	1.65718	0.89156	0.848058		236.5	163044	146551	143440	125642	104290	81549.8	58081.1	30843.4	16593.7	15784
	236.6	8.60075	7.73593	7.58398	6.63804	5.50309	4.31734	3.06982	1.62872	0.86678	0.838255		236.6	160077	143981	141153	123547	102424	80354.3	57135.5	30313.7	16132.5	15601.6
	236.7	8.43998	7.59683	7.45979	6.52461	5.40177	4.25221	3.01865	1.5999	0.841872	0.828023		236.7	157085	141392	138841	121436	100538	79142.2	56183.1	29777.4	15668.9	15411.1
	236.8	8.27808	7.45687	7.3344	6.41038	5.29953	4.18626	2.96718	1.57077	0.816872	0.817382		236.8	154072	138787	136508	119310	98634.8	77914.6	55225	29235.2	15203.6	15213.1
	236.9	8.11521	7.31618	7.20796	6.29549	5.1965	4.11953	2.91546	1.54135	0.791829	0.806344		236.9	151040	136169	134154	117171	96717.1	76672.7	54262.5	28687.7	14737.5	15007.7
	237	7.95156	7.17491	7.08058	6.18004	5.09279	4.05209	2.86356	1.51169	0.766792	0.794919		237	147994	133539	131784	115023	94786.9	75417.4	53296.5	28135.5	14271.5	14795
	237.1	7.78731	7.03322	6.95241	6.06417	4.98853	3.98398	2.81154	1.48181	0.741809	0.783121		237.1	144937	130902	129398	112866	92846.5	74149.7	52328.3	27579.4	13806.5	14575.4
	237.2	7.62263	6.89123	6.82356	5.94797	4.88385	3.91526	2.75944	1.45176	0.716924	0.770966		237.2	141872	128259	127000	110704	90898.2	72870.7	51358.6	27020.1	13343.4	14349.2
	237.3	7.45769	6.74909	6.69416	5.83156	4.77886	3.846	2.7073	1.42156	0.692168	0.758467		237.3	138802	125614	124592	108537	88944	71581.6	50388.2	26458.1	12882.6	14116.6
	237.4	7.29266	6.60693	6.56433	5.71505	4.67366	3.77625	2.65516	1.39124	0.667567	0.745637		237.4	135731	122968	122175	106368	86986	70283.5	49417.7	25893.7	12424.7	13877.8
	237.5	7.1277	6.46487	6.43418	5.59854	4.56835	3.70608	2.60303	1.36082	0.643148	0.732484		237.5	132661	120324	119753	104200	85026.1	68977.5	48447.6	25327.6	11970.3	13633
	237.6	6.96297	6.32305	6.30382	5.48214	4.46304	3.63555	2.55096	1.33034	0.618929	0.719022		237.6	129595	117684	117327	102034	83066.1	67664.7	47478.4	24760.4	11519.5	13382.4
	237.7	6.79865	6.18158	6.17338	5.36596	4.35783	3.56472	2.49897	1.29983	0.594916	0.705269		237.7	126536	115052	114899	99871.2	81107.9	66346.5	46510.7	24192.5	11072.6	13126.5
	237.8	6.6349	6.0406	6.04295	5.2501	4.25278	3.49368	2.44711	1.26932	0.571118	0.691236		237.8	123489	112428	112471	97714.8	79152.8	65024.3	45545.5	23624.6	10629.6	12865.3
	237.9	6.47186	5.90023	5.91263	5.13466	4.14798	3.42249	2.39541	1.23884	0.547556	0.676944		237.9	120454	109815	110046	95566.2	77202.1	63699.4	44583.3	23057.2	10191.1	12599.3
	238	6.30969	5.7606	5.78254	5.01974	4.04349	3.35124	2.3439	1.20839	0.524262	0.662421		238	117436	107216	107625	93427.3	75257.4	62373.3	43624.7	22490.6	9757.56	12329
	238.1	6.14854	5.62182	5.65277	4.90542	3.93942	3.27999	2.29264	1.17799	0.501269	0.647679		238.1	114437	104633	105209	91299.6	73320.4	61047.2	42670.5	21924.8	9329.61	12054.6
	238.2	5.98852	5.48403	5.52346	4.7918	3.83584	3.20881	2.24164	1.14766	0.478613	0.632717		238.2	111458	102069	102803	89184.9	71392.5	59722.3	41721.3	21360.3	8907.93	11776.1
	238.3	5.82975	5.34732	5.39469	4.67896	3.73283	3.13775	2.19096	1.11741	0.45633	0.617547		238.3	108503	99524.3	100406	87084.8	69475.5	58399.8	40778.1	20797.2	8493.22	11493.8
	238.4	5.67235	5.21184	5.26656	4.56701	3.6305	3.06689	2.14064	1.08723	0.434446	0.602189		238.4	105574	97002.7	98021.2	85001.2	67570.8	57080.9	39841.5	20235.5	8085.9	11207.9
	238.5	5.51643	5.07767	5.13916	4.45604	3.52891	2.99629	2.09072	1.05713	0.41298	0.586674		238.5	102672	94505.6	95650	82935.8	65679.9	55766.8	38912.5	19675.4	7686.37	10919.2
	238.6	5.3621	4.94492	5.01256	4.34614	3.42813	2.92599	2.04125	1.02713	0.39194	0.571036		238.6	99799.3	92034.8	93293.7	80890.3	63804.4	54458.4	37991.6	19116.9	7294.78	10628.1
	238.7	5.20945	4.81367	4.88686	4.2374	3.32827	2.85604	1.99223	0.99721	0.371354	0.555314		238.7	96958.1	89592	90954.1	78866.4	61945.8	53156.7	37079.4	18560.1	6911.64	10335.5
	238.8	5.05856	4.68401	4.76217	4.12988	3.22942	2.7865	1.94371	0.967386	0.351253	0.539544		238.8	94149.9	87178.7	88633.4	76865.2	60105.9	51862.3	36176.3	18005	6537.51	10042
	238.9	4.90954	4.55602	4.63859	4.02366	3.13166	2.7174	1.89569	0.937668	0.331656	0.52375		238.9	91376.3	84796.6	86333.4	74888.3	58286.5	50576.3	35282.6	17451.9	6172.78	9748.02
	239	4.76247	4.42978	4.51622	3.91881	3.03509	2.64883	1.84818	0.908071	0.312581	0.507954		239	88639.1	82447	84055.9	72936.9	56489.1	49300	34398.3	16901	5817.76	9454.04
	239.1	4.61745	4.30536	4.39515	3.8154	2.93977	2.58084	1.80118	0.878612	0.294039	0.492188		239.1	85939.9	80131.3	81802.6	71012.1	54714.9	48034.6	33523.5	16352.7	5472.65	9160.59
	239.2	4.47456	4.18283	4.27546	3.71347	2.84577	2.51349	1.75471	0.849308	0.276047	0.476494		239.2	83280.4	77850.7	79574.8	69115.1	52965.4	46781	32658.7	15807.3	5137.79	8868.51
	239.3	4.33386	4.06224	4.15722	3.61309	2.75316	2.44685	1.70881	0.820173	0.258628	0.460921		239.3	80661.8	75606.3	77374	67246.8	51241.7	45540.7	31804.4	15265	4813.57	8578.65
	239.4	4.19544	3.94365	4.04049	3.51429	2.66201	2.38097	1.66353	0.791233	0.241795	0.445512		239.4	78085.5	73399.2	75201.5	65408	49545.2	44314.5	30961.5	14726.4	4500.29	8291.87
	239.5	4.05937	3.82713	3.92534	3.41711	2.57238	2.3159	1.61888	0.762527	0.225557	0.43031		239.5	75552.9	71230.5	73058.4	63599.2	47877.1	43103.5	30130.7	14192.1	4198.07	8008.92
	239.6	3.92573	3.71272	3.81184	3.32158	2.48432	2.25169	1.57492	0.734084	0.209918	0.415352		239.6	73065.6	69101.1	70946	61821.3	46238.1	41908.5	29312.5	13662.8	3907	7730.52
	239.7	3.7946	3.60046	3.70006	3.22775	2.39786	2.18839	1.53168	0.705929	0.194877	0.400663		239.7	70625	67011.7	68865.4	60074.9	44629	40730.3	28507.6	13138.7	3627.04	7457.14
	239.8	3.66603	3.49038	3.59005	3.13565	2.31304	2.12602	1.48918	0.678104	0.180437	0.386272		239.8	68232.2	64962.9	66817.9	58360.7	43050.3	39569.5	27716.5	12620.9	3358.28	7189.3
	239.9	3.54008	3.38251	3.48188	3.04531	2.2299	2.06463	1.44745	0.650634	0.166622	0.372201		239.9	65887.9	62955.2	64804.8	56679.3	41502.8	38426.9	26939.9	12109.6	3101.17	6927.41
	240	3.41676	3.27687	3.37561	2.95678	2.14845	2.00426	1.40652	0.623544	0.15346	0.358462		240	63592.8	60989.1	62826.9	55031.5	39986.8	37303.3	26178.1	11605.4	2856.2	6671.68
	240.1	3.29612	3.1735	3.27128	2.87007	2.06871	1.94494	1.36641	0.596844	0.140958	0.345066		240.1	61347.3	59065.2	60885.1	53417.8	38502.7	36199.2	25431.7	11108.5	2623.51	6422.37
	240.2	3.17817	3.07244	3.16893	2.78524	1.99071	1.8867	1.32715	0.570557	0.129113	0.33203		240.2	59152.1	57184.2	58980.1	51838.8	37051.1	35115.3	24700.9	10619.2	2403.05	6179.74
	240.3	3.06294	2.97369	3.06859	2.70228	1.9145	1.82958	1.28874	0.544695	0.117918	0.319368		240.3	57007.4	55346.3	57112.5	50294.7	35632.7	34052.2	23986.1	10137.9	2194.69	5944.08
	240.4	2.95047	2.87728	2.97027	2.6212	1.84009	1.77361	1.2512	0.519261	0.107366	0.3071		240.4	54914	53551.9	55282.7	48785.7	34247.7	33010.4	23287.3	9664.48	1998.3	5715.74
[truncated: 346 more rows]

## Sheet: 1b
T (oC )	T (K)	θ - θcoil(95)		c	3.4e-05	M		Results from OriginPro					T (oC )	T (K)	DGfit	DHfit	TDSfit	Keq	cF	F(T)
[truncated: 951 more rows]

[truncated: 57 more sheets: CD-1c, 1c, CD-1d, 1d, CD-2a, 2a, CD-2b, 2b, CD-2c, 2c, CD-2d, 2d, CD-2e, 2e, CD-2f, 2f, CD-2g, 2g, CD-2h, 2h …]
